# Supplementary material for: Discovery of Biomarkers for Amyotrophic Lateral Sclerosis and Frontotemporal Lobar Degeneration From Human Cerebrospinal Fluid Using Mass Spectrometry-Based Proteomics
Source: Research Square preprint supplement (doi:10.21203/rs.3.rs-148356/v1), 2021-01-19
Supplement: Supplementary file 1 [file 4e524921e01fd3296e1fa254.xlsx]

## Sheet: ALS_CSF_4sets
log2 (relative abundance)																																								Statistical analysis				Protein information
Control_1	Control_2	Control_3	Control_4	Control_5	ALS_1	ALS_2	ALS_3	ALS_4	ALS_5	Control_6	Control_7	Control_8	Control_9	Control_10	ALS_6	ALS_7	ALS_8	ALS_9	ALS_10	Control_11	Control_12	Control_13	Control_14	Control_15	ALS_11	ALS_12	ALS_13	ALS_14	ALS_15	Control_16	Control_17	Control_18	Control_19	Control_20	ALS_16	ALS_17	ALS_18	ALS_19	ALS_20	-log10 (P value)	P value	q-value	log2 (ALS/Control)	Accession	Description	FASTA Title Lines	Coverage [%]	# Peptides	# PSMs
-1.44489	-1.02903	-0.808339	-1.5308	0.600066	1.5431	-0.452631	0.747403	1.04777	1.91214	-0.864819	-1.4563	-1.53672	-1.58991	-1.647	3.16432	1.40044	0.682474	1.30985	1.6719	-0.351288	-0.0890701	0.114926	-0.306	-0.331489	-0.273485	0.0149663	0.701074	-0.0843376	0.272914	-1.33216	-0.973227	-1.65155	-0.907868	-0.614862	-0.0930979	0.345515	-0.175107	2.6956	0.268605	6.83336	1.46771e-07	0	1.72249	P07196	Neurofilament light polypeptide OS=Homo sapiens OX=9606 GN=NEFL PE=1 SV=3	>sp|P07196|NFL_HUMAN Neurofilament light polypeptide OS=Homo sapiens OX=9606 GN=NEFL PE=1 SV=3	32	14	168
-1.68192	-1.54602	-1.55936	-2.12368	-1.82386	1.78005	-0.899551	1.76906	3.71205	1.19169	-0.146607	-1.15235	-1.18087	-1.56691	-1.66007	2.21651	2.57628	3.18445	0.560365	-0.100616	-1.25434	-0.98071	-2.34261	-2.29576	-2.54199	0.614147	-0.0417244	0.68441	-1.22399	-0.400033	-1.93349	-0.664983	-2.65198	-1.53128	-1.42111	-1.5073	1.287	-0.570636	2.36526	1.29663	7.69734	2.00751e-08	0	2.5277	Q15782	Chitinase-3-like protein 2 OS=Homo sapiens OX=9606 GN=CHI3L2 PE=1 SV=1	>sp|Q15782|CH3L2_HUMAN Chitinase-3-like protein 2 OS=Homo sapiens OX=9606 GN=CHI3L2 PE=1 SV=1	47	14	89
-4.09472	-4.68783	-4.15756	-5.06078	-0.0231261	-0.699823	-4.2592	-1.09296	7.7462	2.91288	-3.28665	-3.09553	-3.87437	-3.95926	-3.55386	5.34675	1.48395	-1.1479	0.324148	0.830087	-4.82947	-4.34615	-3.10762	-2.37649	-4.61488	-4.57582	-1.35166	0.210161	0.0365886	-1.64748	-3.64553	-4.40793	-4.18815	-3.50771	-3.46995	-2.33933	-0.973004	-3.11893	8.32702	-0.413654	4.72637	1.87771e-05	0	3.99428	Q13231	Chitotriosidase-1 OS=Homo sapiens OX=9606 GN=CHIT1 PE=1 SV=1	>sp|Q13231|CHIT1_HUMAN Chitotriosidase-1 OS=Homo sapiens OX=9606 GN=CHIT1 PE=1 SV=1	52	19	129
-1.86866	-1.83817	-1.36315	-1.75806	-0.147824	2.16599	-0.368527	0.915866	1.24252	1.64548	-1.77684	-3.09096	-2.87153	-3.12951	-3.0958	4.50284	1.25495	0.848208	1.71633	2.15671	-3.48337	-2.78701	-3.13103	-2.01586	-3.63039	-0.054675	0.614228	4.75198	0.940095	0.426544	-3.26195	-2.77813	-3.57488	-1.40676	-2.66824	-1.81091	-0.519982	0.405943	4.12513	1.05189	10.1565	6.97457e-11	0	3.78444	P07197	Neurofilament medium polypeptide OS=Homo sapiens OX=9606 GN=NEFM PE=1 SV=3	>sp|P07197|NFM_HUMAN Neurofilament medium polypeptide OS=Homo sapiens OX=9606 GN=NEFM PE=1 SV=3	29	25	76
-2.21261	1.32768	-1.39412	-1.6996	0.55678	3.07697	-0.776879	2.2081	0.92358	2.72873	NaN	NaN	NaN	NaN	NaN	NaN	NaN	NaN	NaN	NaN	-0.938366	-0.66551	-1.04627	-0.35474	-1.5533	0.322998	0.421326	3.15718	0.558785	0.353529	-3.52239	-3.60956	-3.13266	-3.24	-4.02489	-2.14806	0.526304	-0.411285	3.65956	1.58953	4.22805	5.9149e-05	0.00133333	2.77999	P12036	Neurofilament heavy polypeptide OS=Homo sapiens OX=9606 GN=NEFH PE=1 SV=4	>sp|P12036|NFH_HUMAN Neurofilament heavy polypeptide OS=Homo sapiens OX=9606 GN=NEFH PE=1 SV=4	10	9	35
-0.750466	0.518646	-1.67604	-0.482689	-0.180135	1.1422	-0.262	-0.10648	1.70122	1.41225	0.278326	-1.53754	-0.606619	-0.0405785	0.176485	0.555063	1.39112	1.52301	1.14532	1.23845	-0.921463	-0.436386	-0.659786	-0.120592	-0.878756	0.355365	0.726986	0.026318	0.231043	0.503004	-0.886578	-0.69583	-0.360322	0.398434	-0.970919	-0.0626092	0.764916	-0.975726	0.533303	-0.116681	5.15848	6.94249e-06	0.00857143	1.07794	P01011	Alpha-1-antichymotrypsin OS=Homo sapiens OX=9606 GN=SERPINA3 PE=1 SV=2	>sp|P01011|AACT_HUMAN Alpha-1-antichymotrypsin OS=Homo sapiens OX=9606 GN=SERPINA3 PE=1 SV=2	71	30	1986
-0.654345	-0.0888901	0.0779176	-0.867019	-0.178807	1.3339	-0.26368	0.405898	1.14812	0.00849297	-0.795604	-1.32231	-0.234358	-0.836345	-0.973024	1.00421	1.14942	0.246331	0.314247	1.95996	-0.57908	-0.567102	-0.932649	0.136355	-0.304514	-0.442802	0.276937	2.14823	0.673971	0.849032	0.0966472	-0.268459	-0.381032	-0.327	-0.706896	-0.934997	-0.815044	0.0711147	0.83623	0.583023	4.83119	1.47506e-05	0.015	1.01295	P09936	Ubiquitin carboxyl-terminal hydrolase isozyme L1 OS=Homo sapiens OX=9606 GN=UCHL1 PE=1 SV=2	>sp|P09936|UCHL1_HUMAN Ubiquitin carboxyl-terminal hydrolase isozyme L1 OS=Homo sapiens OX=9606 GN=UCHL1 PE=1 SV=2	49	8	42
-1.22924	-1.31665	-1.38354	-0.714694	0.0628624	1.42575	0.18297	0.706948	0.93943	0.289734	1.09732	-1.27557	-0.709249	-0.918021	-0.565744	-0.755248	1.40111	1.50717	1.1134	0.368349	-1.39126	-0.00939712	-0.864592	-0.190074	0.24916	1.02731	0.939137	0.832434	0.63712	0.423607	-0.807132	1.28132	-1.29021	0.619169	-1.37904	-0.980446	-0.119979	-0.132357	0.773781	0.0740525	4.09344	8.06411e-05	0.0244	1.06944	Q14956	Transmembrane glycoprotein NMB OS=Homo sapiens OX=9606 GN=GPNMB PE=1 SV=2	>sp|Q14956|GPNMB_HUMAN Transmembrane glycoprotein NMB OS=Homo sapiens OX=9606 GN=GPNMB PE=1 SV=2	12	5	50
1.31805	0.528316	0.829263	1.12539	0.0269537	-0.288006	0.118249	-0.648603	-0.927746	0.0785201	0.381786	0.549508	0.57948	0.758618	0.44877	-0.674278	-0.357048	-0.419944	0.633855	-0.61722	1.08954	-0.0652761	0.558675	0.992961	-0.0194658	0.272993	-1.0313	0.414911	-0.131492	0.316184	0.604642	0.118289	0.613699	0.000553015	0.353778	-0.294444	-0.185444	-0.00310228	0.287787	-0.309564	5.36078	4.35735e-06	0.0261818	-0.727961	Q7Z7M0	Multiple epidermal growth factor-like domains protein 8 OS=Homo sapiens OX=9606 GN=MEGF8 PE=1 SV=2	>sp|Q7Z7M0|MEGF8_HUMAN Multiple epidermal growth factor-like domains protein 8 OS=Homo sapiens OX=9606 GN=MEGF8 PE=1 SV=2	29	56	708
-0.235484	-0.408815	-0.52516	-0.0946599	-0.545859	-0.18959	1.21568	-0.539687	-0.142323	-0.449498	-0.141987	-1.49628	-0.960569	-1.02267	-0.736529	-2.37913	-0.215985	0.19604	3.74626	-0.233766	-1.11788	-1.73715	-1.93298	-1.72538	-2.51391	2.49361	1.4657	1.98243	-0.399463	0.559367	0.231939	-2.45171	-1.16867	-0.435904	-1.05154	0.268486	-1.0641	1.84908	-0.985288	2.98832	3.49501	0.000319879	0.0262222	1.51187	P00505	Aspartate aminotransferase, mitochondrial OS=Homo sapiens OX=9606 GN=GOT2 PE=1 SV=3	>sp|P00505|AATM_HUMAN Aspartate aminotransferase, mitochondrial OS=Homo sapiens OX=9606 GN=GOT2 PE=1 SV=3	14	4	8
NaN	NaN	NaN	NaN	NaN	NaN	NaN	NaN	NaN	NaN	-2.27714	-0.563675	-0.923715	-1.26621	-1.0528	2.06294	1.19542	1.20324	0.466657	4.34337	NaN	NaN	NaN	NaN	NaN	NaN	NaN	NaN	NaN	NaN	-1.527	1.12617	0.417919	-2.35418	-0.971669	1.13736	2.74171	-0.446476	0.206717	-0.249551	2.91343	0.0012206	0.028	2.20537	P49454	Centromere protein F OS=Homo sapiens OX=9606 GN=CENPF PE=1 SV=2	>sp|P49454|CENPF_HUMAN Centromere protein F OS=Homo sapiens OX=9606 GN=CENPF PE=1 SV=2	1	3	5
0.951745	0.37005	1.72044	0.432691	0.357414	-0.375161	0.681722	0.269569	-1.08523	0.183897	-0.149534	2.36916	1.43102	1.03667	1.20389	0.10796	-1.8737	-0.106659	0.321705	-0.865369	1.54142	-0.0713619	0.141094	0.411492	0.613637	-0.0111514	-2.3371	0.597533	-0.612653	-1.7234	1.31695	0.340886	0.914158	-0.301943	-0.194805	-1.87625	-1.07303	0.00109877	0.615133	0.920308	3.79708	0.00015956	0.0286667	-1.13379	P47972	Neuronal pentraxin-2 OS=Homo sapiens OX=9606 GN=NPTX2 PE=1 SV=2	>sp|P47972|NPTX2_HUMAN Neuronal pentraxin-2 OS=Homo sapiens OX=9606 GN=NPTX2 PE=1 SV=2	48	16	149
0.581908	0.236902	0.351444	0.0441008	-0.844842	-0.681531	-0.368196	-0.774843	-0.028183	-0.300088	1.06505	0.0527085	1.1933	0.0549078	0.859708	-1.69884	-2.29424	-1.42593	0.587356	-1.0777	0.846809	0.125017	-0.0392487	0.643601	-0.744783	-0.738074	-1.82517	0.663184	-1.58348	-0.184093	0.764221	0.272972	0.303852	0.830117	-0.198076	-0.457565	-0.716963	0.258981	0.496257	-0.554911	3.93489	0.000116175	0.0331429	-0.955184	Q9UQM7	Calcium/calmodulin-dependent protein kinase type II subunit alpha OS=Homo sapiens OX=9606 GN=CAMK2A PE=1 SV=2	>sp|Q9UQM7|KCC2A_HUMAN Calcium/calmodulin-dependent protein kinase type II subunit alpha OS=Homo sapiens OX=9606 GN=CAMK2A PE=1 SV=2	24	9	132
-2.37504	-2.76075	-3.26887	-2.91668	-3.59062	-3.36367	-3.66473	-1.95268	-2.98349	-0.784309	-1.67266	-3.70824	-3.54247	-3.38694	-4.06628	-2.43867	-0.192864	-1.51432	3.90115	-0.339037	-1.48188	-1.36817	-2.0501	-1.64013	-2.86331	-2.06075	1.1302	-0.117818	1.0443	7.99767	-3.75188	-3.05811	-2.32405	-1.51579	1.03936	-0.305176	0.0310405	0.832397	0.0746148	-2.88208	2.59648	0.00253235	0.0410526	2.13572	P04114	Apolipoprotein B-100 OS=Homo sapiens OX=9606 GN=APOB PE=1 SV=2	>sp|P04114|APOB_HUMAN Apolipoprotein B-100 OS=Homo sapiens OX=9606 GN=APOB PE=1 SV=2	39	153	888
1.33408	0.967784	0.983248	0.684311	0.150599	-0.361249	0.651714	-0.422534	-0.171573	-0.501395	0.086844	1.07498	0.334911	0.542288	-0.147668	-0.643065	-1.10364	-0.31979	0.507542	-0.763093	0.705549	-0.239493	1.0015	1.48451	-0.0655611	0.213157	-0.797889	0.758939	-0.224122	-0.0540706	0.530055	1.06152	0.843117	0.28119	-0.334836	-0.815792	-0.573913	-0.0237912	0.597571	0.129495	4.16407	6.85382e-05	0.0424444	-0.759821	P05067	Amyloid-beta A4 protein OS=Homo sapiens OX=9606 GN=APP PE=1 SV=3	>sp|P05067|A4_HUMAN Amyloid-beta A4 protein OS=Homo sapiens OX=9606 GN=APP PE=1 SV=3	46	31	1620
1.24648	0.174642	1.30945	0.58014	0.227688	0.0389282	0.450213	-0.171414	-0.620118	-0.0748745	0.57841	1.33523	0.541182	0.982091	0.781299	-0.696239	-1.13168	-0.538615	0.773812	-0.732993	0.471833	-0.571645	0.386023	0.693578	0.211797	0.19507	-0.953413	0.724309	-0.455722	-0.241027	0.843476	-0.0721419	0.736215	0.441213	0.0832144	-0.838041	-0.469976	0.517164	0.507687	-0.126161	4.11969	7.59115e-05	0.043	-0.741163	P32004	Neural cell adhesion molecule L1 OS=Homo sapiens OX=9606 GN=L1CAM PE=1 SV=2	>sp|P32004|L1CAM_HUMAN Neural cell adhesion molecule L1 OS=Homo sapiens OX=9606 GN=L1CAM PE=1 SV=2	36	37	311
-1.69928	-0.329885	-2.238	-2.88255	-1.60143	0.561059	-0.505045	0.416809	0.212671	0.781099	1.28123	-2.91456	0.246539	-1.6395	-1.12034	0.908699	0.721217	0.583485	0.502277	1.27423	-0.544727	0.616238	-0.631294	-0.273054	-1.35562	0.216864	0.544887	1.52298	-0.152365	0.264487	0.855737	-1.05748	-0.134697	0.530075	-0.734488	-0.0163943	-1.59987	0.836327	-0.00618251	0.0628428	3.23454	0.000582714	0.044	1.13786	P36222	Chitinase-3-like protein 1 OS=Homo sapiens OX=9606 GN=CHI3L1 PE=1 SV=2	>sp|P36222|CH3L1_HUMAN Chitinase-3-like protein 1 OS=Homo sapiens OX=9606 GN=CHI3L1 PE=1 SV=2	66	23	223
NaN	NaN	NaN	NaN	NaN	NaN	NaN	NaN	NaN	NaN	-2.06113	-1.96924	-2.74401	-2.40668	-2.11402	-2.20755	-0.55212	-1.63814	6.18996	2.76872	-1.68737	-1.66046	-3.00197	-2.73612	-2.35969	-1.08787	5.19711	-1.57035	-0.735943	5.70142	-1.68592	-2.68859	-1.82376	-1.20736	-0.745498	0.883809	-1.71168	-0.130727	-1.25756	-2.14492	2.5611	0.00274726	0.0445333	2.57307	P02776	Platelet factor 4 OS=Homo sapiens OX=9606 GN=PF4 PE=1 SV=2	>sp|P02776|PLF4_HUMAN Platelet factor 4 OS=Homo sapiens OX=9606 GN=PF4 PE=1 SV=2	26	2	6
0.3737	-0.299019	-0.439455	-0.0340331	-0.109913	1.77889	0.455578	2.1867	0.605998	0.504039	-2.90254	-0.856256	-0.327083	-1.40476	-0.387546	0.0584862	1.63675	1.07245	-0.49959	1.31434	-1.08862	1.3573	-0.875333	-0.698568	-0.200585	0.909253	0.530659	-0.0527869	1.0524	0.0638644	-0.424473	1.31814	0.705005	-0.0438708	-0.79125	0.251793	-0.0135444	0.602189	0.0472773	0.684416	3.43358	0.000368488	0.0465	1.01592	P61626	Lysozyme C OS=Homo sapiens OX=9606 GN=LYZ PE=1 SV=1	>gi|179| LYSC_HUMAN;>sp|P61626|LYSC_HUMAN Lysozyme C OS=Homo sapiens OX=9606 GN=LYZ PE=1 SV=1	57	7	127
0.902716	0.662468	1.30792	0.833202	-0.334266	-0.356269	0.0769604	0.416389	-1.07641	-0.382596	0.123992	1.31097	0.700072	1.18093	0.300013	0.0725238	-1.20863	-0.895131	0.465343	-1.05316	0.332628	0.0327882	0.643113	0.685096	-0.0691853	0.435443	-0.111454	0.44365	-0.142145	-0.73275	1.15028	-0.114766	0.704251	0.419907	-0.392651	-0.933408	-0.555171	0.458132	-0.352185	0.665452	3.83498	0.000146224	0.0514286	-0.757245	O94985	Calsyntenin-1 OS=Homo sapiens OX=9606 GN=CLSTN1 PE=1 SV=1	>sp|O94985|CSTN1_HUMAN Calsyntenin-1 OS=Homo sapiens OX=9606 GN=CLSTN1 PE=1 SV=1	45	42	883
1.08807	-0.155516	0.765902	0.245607	-0.343304	-0.588193	0.226393	-0.381762	-0.217837	-0.190484	0.758316	1.11699	1.74131	0.571056	0.766098	-0.385087	-1.34076	-0.136413	0.730251	-0.614588	0.706704	-0.453452	0.5313	0.783226	-0.107439	0.482986	-0.926169	0.668586	-0.90169	-0.480836	0.999846	0.192105	0.942889	0.76679	0.0425258	-0.868905	-0.658725	0.738651	0.951171	-1.12299	3.64798	0.000224916	0.0521818	-0.798771	Q9UHC6	Contactin-associated protein-like 2 OS=Homo sapiens OX=9606 GN=CNTNAP2 PE=1 SV=1	>sp|Q9UHC6|CNTP2_HUMAN Contactin-associated protein-like 2 OS=Homo sapiens OX=9606 GN=CNTNAP2 PE=1 SV=1	35	36	289
-0.0020787	-0.0417487	-0.600262	-0.506951	0.341741	0.304239	0.503384	1.05094	1.52777	1.1412	0.297604	-1.47789	-1.92052	-0.532135	0.362751	0.224805	0.889055	0.594051	-0.386059	0.370477	-0.291388	-0.339086	-0.748919	-0.938926	-2.34376	-0.888781	0.0578845	-0.419455	0.0163144	-0.35658	-0.147561	-0.83366	0.287455	-0.644804	-0.379216	-0.360844	0.189885	0.108994	0.784208	1.00614	3.43208	0.000369761	0.0565217	0.840849	P40121	Macrophage-capping protein OS=Homo sapiens OX=9606 GN=CAPG PE=1 SV=2	>sp|P40121|CAPG_HUMAN Macrophage-capping protein OS=Homo sapiens OX=9606 GN=CAPG PE=1 SV=2	36	9	40
0.584558	0.430603	0.598797	0.423068	-0.355385	-0.607668	0.200816	-0.379284	-0.132252	-0.221315	0.457564	0.864783	0.408303	0.372655	0.749129	-0.786423	-0.618359	-0.270406	0.289696	0.649376	0.457393	0.610837	0.34269	0.656733	0.742913	-0.110714	-0.328228	0.90882	0.37741	-0.00499853	0.876373	-0.00348604	0.791732	0.315373	-0.0324517	-0.637971	-0.734045	0.193823	0.0163577	-0.464567	4.54186	2.87169e-05	0.05712	-0.597606	P60174	Triosephosphate isomerase OS=Homo sapiens OX=9606 GN=TPI1 PE=1 SV=3	>sp|P60174|TPIS_HUMAN Triosephosphate isomerase OS=Homo sapiens OX=9606 GN=TPI1 PE=1 SV=3	77	18	280
0.224593	0.233018	0.424185	0.343248	0.822986	-1.14339	0.134133	0.085825	0.353854	-0.571673	1.11911	-0.587726	0.939042	0.821874	0.821957	-0.640169	0.0805885	0.0583352	-0.283879	-0.149916	1.05364	0.335865	-0.175149	0.408545	0.273232	-0.827272	-0.157008	0.0309389	-0.449491	-0.380324	0.290893	0.146975	-0.154222	1.58079	0.878877	-0.5479	0.230706	-0.496161	0.897564	0.236296	3.92202	0.000119668	0.0584286	-0.667034	K7ES70	Microfibril-associated glycoprotein 4 OS=Homo sapiens OX=9606 GN=MFAP4 PE=1 SV=1	>tr|K7ES70|K7ES70_HUMAN Microfibril-associated glycoprotein 4 OS=Homo sapiens OX=9606 GN=MFAP4 PE=1 SV=1	22	5	151
-2.01172	0.40186	-2.02381	-2.23498	0.448337	0.220984	0.235264	0.0586236	2.14533	0.242999	-1.54751	0.154658	-1.75488	0.546144	-1.98647	1.86204	1.51134	1.46645	0.227633	-1.08853	1.21726	-1.52781	-1.25472	-1.4224	-0.102562	1.06101	0.306112	0.962806	0.870245	-0.606182	-1.81577	0.272582	0.780438	-0.29749	0.410425	-0.0649063	1.09659	-1.65673	-0.763424	1.12192	2.75605	0.00175368	0.0588966	1.1479	Q6P179	Endoplasmic reticulum aminopeptidase 2 OS=Homo sapiens OX=9606 GN=ERAP2 PE=1 SV=2	>sp|Q6P179|ERAP2_HUMAN Endoplasmic reticulum aminopeptidase 2 OS=Homo sapiens OX=9606 GN=ERAP2 PE=1 SV=2	19	18	52
4.39678	2.50786	4.18615	3.80701	0.410334	-0.0442382	0.330727	-0.466536	-0.102905	1.26395	NaN	NaN	NaN	NaN	NaN	NaN	NaN	NaN	NaN	NaN	NaN	NaN	NaN	NaN	NaN	NaN	NaN	NaN	NaN	NaN	NaN	NaN	NaN	NaN	NaN	NaN	NaN	NaN	NaN	NaN	2.15487	0.00700059	0.058963	-2.86543	P07320	Gamma-crystallin D OS=Homo sapiens OX=9606 GN=CRYGD PE=1 SV=3	>sp|P07320|CRGD_HUMAN Gamma-crystallin D OS=Homo sapiens OX=9606 GN=CRYGD PE=1 SV=3	15	2	2
NaN	NaN	NaN	NaN	NaN	NaN	NaN	NaN	NaN	NaN	-0.668972	-0.229369	-0.551913	-1.13547	-0.732138	1.34407	0.938648	1.85975	0.286336	0.133647	-0.396641	-0.0798078	0.103651	-0.135624	-0.207526	-0.636796	0.838205	-0.350369	-0.279259	0.906834	-0.575625	-0.0646182	-1.09344	-0.15552	-0.105743	0.751475	0.655172	-0.751743	0.246303	0.727918	3.33669	0.000460588	0.059	0.846597	G5EA09	Syndecan binding protein (Syntenin), isoform CRA_a OS=Homo sapiens OX=9606 GN=SDCBP PE=1 SV=1	>tr|G5EA09|G5EA09_HUMAN Syndecan binding protein (Syntenin), isoform CRA_a OS=Homo sapiens OX=9606 GN=SDCBP PE=1 SV=1	24	3	13
1.62267	0.739875	0.80512	0.603874	-0.622401	-1.06642	0.489925	-1.0344	-0.0488402	-1.13498	0.0916084	0.923928	0.344736	0.920918	0.112809	-0.316195	-0.938653	-0.151258	0.99347	-0.911812	0.837087	-0.589992	0.901035	1.78575	0.227061	0.40351	-1.50721	0.861676	-0.507424	0.0942094	1.12445	0.959675	1.03316	-0.377953	-0.366583	-0.73755	-0.246274	0.171846	0.151104	0.0150682	3.26614	0.000541827	0.0593333	-0.824852	Q6MZW2	Follistatin-related protein 4 OS=Homo sapiens OX=9606 GN=FSTL4 PE=2 SV=3	>sp|Q6MZW2|FSTL4_HUMAN Follistatin-related protein 4 OS=Homo sapiens OX=9606 GN=FSTL4 PE=2 SV=3	51	35	364
0.317802	0.366748	0.691237	0.133453	0.383654	-0.0898442	-0.0540958	-0.0136444	0.0253584	-0.127908	0.395257	0.0984369	-0.0575494	0.166882	-0.111367	0.0455131	-0.406428	-0.41753	-0.250574	-0.450969	0.741542	0.106071	0.764362	0.211954	0.482354	0.296814	-0.299676	0.111044	-0.0948286	-0.217375	0.652876	0.325814	0.457951	0.364052	-0.0110833	-0.480316	-0.274348	-0.0435768	-0.0980113	0.150222	6.3834	4.13616e-07	0.0612308	-0.458531	Q5JRA6	Transport and Golgi organization protein 1 homolog OS=Homo sapiens OX=9606 GN=MIA3 PE=1 SV=1	>sp|Q5JRA6|TGO1_HUMAN Transport and Golgi organization protein 1 homolog OS=Homo sapiens OX=9606 GN=MIA3 PE=1 SV=1	16	24	97
1.205	0.0960202	0.634681	0.0380496	-0.483587	-0.209087	0.540244	-0.98799	-0.77978	0.0820707	0.992827	1.09802	0.94232	0.916617	0.413065	-0.639317	-1.25242	-1.02702	0.431726	-1.21004	0.110645	-0.0286676	0.0879601	0.953719	-0.0300804	0.514576	-0.728741	1.0256	-0.799858	-0.159518	0.540805	0.0778777	0.357766	0.823534	0.00314956	-0.734374	-0.829708	1.02394	0.0277434	-0.256981	3.32277	0.000475589	0.0705455	-0.735933	O14594	Neurocan core protein OS=Homo sapiens OX=9606 GN=NCAN PE=1 SV=3	>sp|O14594|NCAN_HUMAN Neurocan core protein OS=Homo sapiens OX=9606 GN=NCAN PE=1 SV=3	32	32	420
-1.79525	-0.606526	-2.77511	-2.8077	-2.11806	-1.1832	-2.41336	-1.35378	-2.85116	-1.55415	-3.31395	-3.83157	-3.85009	-4.31257	-3.46743	-3.4873	-1.59085	-2.52317	7.21049	3.59608	-2.01528	-0.227127	-3.5543	-2.46028	-2.96903	-1.72159	4.34891	-2.35729	-0.157012	5.40827	-2.16662	-1.64535	-3.19281	-0.092604	-2.47615	1.41206	-1.64475	-0.33362	-3.87874	-2.06269	2.16158	0.00689323	0.072625	2.12705	P02775	Platelet basic protein OS=Homo sapiens OX=9606 GN=PPBP PE=1 SV=3	>sp|P02775|CXCL7_HUMAN Platelet basic protein OS=Homo sapiens OX=9606 GN=PPBP PE=1 SV=3	38	4	27
0.0203708	-0.388219	-1.04815	-0.615777	-0.57	-0.0334051	-0.301839	0.0907011	0.426243	0.712574	0.11533	-1.00696	-0.17818	-0.833506	-0.0389953	-0.225531	0.632131	-0.108528	-0.0890403	0.850275	-0.463647	-0.195271	-0.417493	0.0312357	-0.641023	-0.187276	0.878071	-0.158177	1.11914	-0.208649	-0.821905	-0.926076	-0.614925	0.476857	-0.330159	0.377635	-0.0527524	-0.221019	0.00596621	-0.0767302	4.05939	8.72185e-05	0.0736774	0.593814	P09960	Leukotriene A-4 hydrolase OS=Homo sapiens OX=9606 GN=LTA4H PE=1 SV=2	>sp|P09960|LKHA4_HUMAN Leukotriene A-4 hydrolase OS=Homo sapiens OX=9606 GN=LTA4H PE=1 SV=2	30	16	53
1.07118	0.352075	0.922931	0.314857	-0.437214	-0.315759	0.977612	-0.644639	-0.910821	0.271255	0.94652	1.22883	1.58888	0.535069	1.14918	-0.579635	-2.04118	-1.03546	0.322371	-1.20361	0.703218	0.00798665	0.144659	0.36371	0.949534	0.66442	-0.897702	1.16261	-0.101933	-0.784558	0.768646	-0.191645	0.732252	0.620655	-0.216679	-1.3769	-0.875722	1.54847	0.596813	-0.0243048	2.89082	0.00128581	0.0834118	-0.840166	O95196	Chondroitin sulfate proteoglycan 5 OS=Homo sapiens OX=9606 GN=CSPG5 PE=1 SV=3	>sp|O95196|CSPG5_HUMAN Chondroitin sulfate proteoglycan 5 OS=Homo sapiens OX=9606 GN=CSPG5 PE=1 SV=3	8	3	20
-0.927508	-0.560773	-0.244518	-1.26968	0.0589416	0.747667	0.455335	-0.00171851	0.880312	0.480163	NaN	NaN	NaN	NaN	NaN	NaN	NaN	NaN	NaN	NaN	NaN	NaN	NaN	NaN	NaN	NaN	NaN	NaN	NaN	NaN	NaN	NaN	NaN	NaN	NaN	NaN	NaN	NaN	NaN	NaN	2.35578	0.0044078	0.0926857	1.10106	Q9Y2J2	Band 4.1-like protein 3 OS=Homo sapiens OX=9606 GN=EPB41L3 PE=1 SV=2	>sp|Q9Y2J2|E41L3_HUMAN Band 4.1-like protein 3 OS=Homo sapiens OX=9606 GN=EPB41L3 PE=1 SV=2	3	2	2
-1.6208	-1.06215	-1.75901	-0.932357	-0.385549	9.28037	0.383573	1.26	-1.41918	0.0113383	0.0906707	-2.2131	-0.943803	-0.612788	1.40638	0.912999	0.909243	-0.400131	-1.45775	0.6998	2.33512	0.146236	-1.01197	-0.536794	-0.105445	-0.603162	0.641093	0.430154	-0.411751	0.769741	-4.96327	-4.43262	-4.97847	-3.53436	-0.124118	0.648352	-0.333664	-0.348342	1.56911	-1.72968	1.99197	0.0101866	0.0965217	1.80252	P01817	Immunoglobulin heavy variable 2-5 OS=Homo sapiens OX=9606 GN=IGHV2-5 PE=1 SV=2	>sp|P01817|HV205_HUMAN Immunoglobulin heavy variable 2-5 OS=Homo sapiens OX=9606 GN=IGHV2-5 PE=1 SV=2	49	6	21
-0.313382	0.365914	-0.85758	-0.503655	0.0819623	-0.174743	-0.675323	-0.263768	0.60568	-0.27938	-0.229838	-0.0500445	-0.448502	-0.113553	-0.270284	0.359957	0.126813	0.667553	0.318182	0.518665	-0.378783	-0.282216	-0.233706	-0.146013	-0.496343	0.257595	0.521835	-0.132371	0.792158	-0.062706	-0.698434	0.487926	-1.09063	-0.935313	-0.702553	1.42027	0.974933	0.377465	-0.734037	0.297385	3.4322	0.000369657	0.0966809	0.586559	Q15149	Plectin OS=Homo sapiens OX=9606 GN=PLEC PE=1 SV=3	>sp|Q15149|PLEC_HUMAN Plectin OS=Homo sapiens OX=9606 GN=PLEC PE=1 SV=3	4	13	15
-1.00012	-0.697247	-1.11692	-0.778909	-0.505365	0.328378	0.353581	0.12488	-0.482169	0.290007	-0.213074	-0.317287	0.0805798	-0.190641	-0.848872	0.112083	0.190964	-0.336001	-0.628369	0.425897	-0.603743	-0.164404	-0.16328	-0.195318	0.233188	-0.124947	0.79451	0.459327	0.394089	0.206901	NaN	NaN	NaN	NaN	NaN	NaN	NaN	NaN	NaN	NaN	3.39101	0.000406432	0.09688	0.572703	Q15746	Myosin light chain kinase, smooth muscle OS=Homo sapiens OX=9606 GN=MYLK PE=1 SV=4	>sp|Q15746|MYLK_HUMAN Myosin light chain kinase, smooth muscle OS=Homo sapiens OX=9606 GN=MYLK PE=1 SV=4	1	2	12
0.30729	0.330688	0.976518	0.403368	0.53386	-0.34452	0.0881783	0.0338189	-0.101032	-0.266242	-0.210996	1.59706	0.176274	0.666397	0.340506	0.247959	-0.453235	0.259868	0.183353	-0.0990004	0.65175	-0.305914	0.658995	0.383402	0.273973	0.238785	-0.0255916	0.147763	-0.353953	-0.533756	0.971831	0.188955	0.716195	0.261566	0.0308086	-0.315586	0.118188	0.142992	0.213168	-0.0541658	4.06926	8.52584e-05	0.0972549	-0.491277	Q9BQT9	Calsyntenin-3 OS=Homo sapiens OX=9606 GN=CLSTN3 PE=1 SV=1	>sp|Q9BQT9|CSTN3_HUMAN Calsyntenin-3 OS=Homo sapiens OX=9606 GN=CLSTN3 PE=1 SV=1	28	21	154
-0.317747	-1.08709	-0.287029	-0.482757	-1.00416	0.349108	-0.34695	0.941544	-0.458646	-1.18748	-0.273371	-1.15218	-0.0768237	-1.11919	-0.659821	-0.302949	-0.118911	-0.793738	-0.422847	1.32614	-0.655626	-0.726098	-1.33122	-1.10639	-1.33728	-0.647675	0.307356	0.0413238	-0.0457364	-0.0879066	-0.35547	-0.891639	-0.03577	0.218573	-0.121295	0.353853	0.181176	0.510033	0.248417	0.0962241	3.29684	0.000504845	0.0978	0.637236	Q15257	Serine/threonine-protein phosphatase 2A activator OS=Homo sapiens OX=9606 GN=PTPA PE=1 SV=3	>sp|Q15257|PTPA_HUMAN Serine/threonine-protein phosphatase 2A activator OS=Homo sapiens OX=9606 GN=PTPA PE=1 SV=3	23	6	13
NaN	NaN	NaN	NaN	NaN	NaN	NaN	NaN	NaN	NaN	NaN	NaN	NaN	NaN	NaN	NaN	NaN	NaN	NaN	NaN	-0.50095	-0.0853042	-0.821724	-0.718185	-0.441043	-0.268835	0.744781	0.246306	1.48337	0.687423	0.261317	0.209492	0.097376	-0.324126	-0.584658	0.566071	1.6021	0.782225	-0.301073	-0.0149388	2.58126	0.00262265	0.0979556	0.843523	P30085	UMP-CMP kinase OS=Homo sapiens OX=9606 GN=CMPK1 PE=1 SV=3	>sp|P30085|KCY_HUMAN UMP-CMP kinase OS=Homo sapiens OX=9606 GN=CMPK1 PE=1 SV=3	9	2	4
1.75854	0.023261	1.93941	1.47656	0.636516	-0.220173	0.986155	0.724488	-0.734835	-0.336473	-0.550159	1.58056	0.0368802	1.16857	0.28391	0.345236	-1.68241	-0.678133	0.835778	-0.548514	1.34075	-0.419907	0.488314	0.766039	0.369468	0.141659	-1.30457	0.586774	0.0432651	-0.591807	1.63829	0.483862	0.912026	-0.478556	-0.432078	-1.08528	-0.417485	0.608016	-0.0112446	0.479018	2.60021	0.00251065	0.0982222	-0.794139	Q15818	Neuronal pentraxin-1 OS=Homo sapiens OX=9606 GN=NPTX1 PE=2 SV=2	>sp|Q15818|NPTX1_HUMAN Neuronal pentraxin-1 OS=Homo sapiens OX=9606 GN=NPTX1 PE=2 SV=2	49	20	440
-1.11537	0.421988	-1.28129	-0.0559035	-1.54609	1.06039	-0.349214	-0.312955	1.2385	1.40315	0.851274	-1.33702	-0.388276	-0.250998	0.751139	-0.29616	1.22494	0.911647	1.52672	1.68191	-0.734572	-0.964707	-0.182063	0.900897	-0.562924	-0.0968861	0.240427	-0.301688	0.503556	0.499905	-0.881468	-2.08523	-0.738164	0.187862	0.53133	0.356666	0.250185	-1.37516	0.65628	-0.458721	2.57397	0.00266706	0.098449	0.842153	P01009	Alpha-1-antitrypsin OS=Homo sapiens OX=9606 GN=SERPINA1 PE=1 SV=3	>sp|P01009|A1AT_HUMAN Alpha-1-antitrypsin OS=Homo sapiens OX=9606 GN=SERPINA1 PE=1 SV=3	81	51	12360
2.03796	0.609351	0.856041	0.8645	0.098682	-0.758058	0.206154	-0.574083	-0.123876	-0.752605	0.0801338	0.391856	0.725804	0.247857	0.0632763	-0.310304	-0.729117	0.846448	0.475885	-0.264833	1.05181	-0.48085	0.458626	0.842333	-0.357513	0.142935	-0.913993	0.406233	-0.708666	-0.205397	0.637423	1.19634	0.564815	0.353104	0.113885	-0.2982	-0.272309	-0.0848541	1.37064	-0.103459	3.02005	0.000954877	0.0984615	-0.650345	Q96FE5	Leucine-rich repeat and immunoglobulin-like domain-containing nogo receptor-interacting protein 1 OS=Homo sapiens OX=9606 GN=LINGO1 PE=1 SV=2	>sp|Q96FE5|LIGO1_HUMAN Leucine-rich repeat and immunoglobulin-like domain-containing nogo receptor-interacting protein 1 OS=Homo sapiens OX=9606 GN=LINGO1 PE=1 SV=2	27	14	135
-0.738112	-1.46849	-2.01275	-1.73523	2.48023	2.53096	1.26546	0.297975	0.116097	0.67962	-4.4487	0.53838	-1.79653	-0.548207	-1.69752	0.609158	1.6154	-0.0238523	-3.0132	-0.531096	-1.85309	-0.81984	-0.548764	-1.10339	-0.109924	2.88018	0.442723	0.897217	-0.115515	-0.973668	-0.442219	-0.673573	-3.36261	-4.11749	-3.41192	-1.36843	-0.0689055	-2.5811	-1.14151	-1.20793	2.16456	0.00684603	0.0985366	1.40897	P01714	Immunoglobulin lambda variable 3-19 OS=Homo sapiens OX=9606 GN=IGLV3-19 PE=1 SV=2	>sp|P01714|LV319_HUMAN Immunoglobulin lambda variable 3-19 OS=Homo sapiens OX=9606 GN=IGLV3-19 PE=1 SV=2	35	2	42
NaN	NaN	NaN	NaN	NaN	NaN	NaN	NaN	NaN	NaN	-0.738902	0.170957	-1.05082	0.300133	-1.05213	1.52312	1.28824	0.606013	-0.362229	-0.56963	-0.641732	-0.283654	0.703985	0.929608	-0.624154	2.07124	0.105511	0.223772	-0.352059	0.617723	-0.793908	-0.391731	-0.592853	-0.315775	0.536931	1.57926	1.44313	-0.200678	1.53985	-0.0616961	2.44203	0.00361384	0.098566	0.886375	P01718	Immunoglobulin lambda variable 3-27 OS=Homo sapiens OX=9606 GN=IGLV3-27 PE=1 SV=2	>sp|P01718|LV327_HUMAN Immunoglobulin lambda variable 3-27 OS=Homo sapiens OX=9606 GN=IGLV3-27 PE=1 SV=2	33	3	11
0.321688	0.562595	0.632772	0.131798	0.0568588	-0.441783	0.204492	-0.410118	-0.115222	-0.668421	-0.0582183	0.697148	0.0467052	1.0307	0.744677	-0.173338	-0.882682	-0.828957	-0.629078	-0.967513	0.61237	-0.311592	0.764848	0.75228	0.635928	0.382827	-0.120056	0.457904	0.204336	0.0611139	0.524222	-0.345566	1.03867	0.39878	0.212687	0.188669	-0.264017	0.566956	0.615619	-0.239289	3.64153	0.000228281	0.0989744	-0.575395	O15466	Alpha-2,8-sialyltransferase 8E OS=Homo sapiens OX=9606 GN=ST8SIA5 PE=1 SV=2	>sp|O15466|SIA8E_HUMAN Alpha-2,8-sialyltransferase 8E OS=Homo sapiens OX=9606 GN=ST8SIA5 PE=1 SV=2	27	10	35
-0.393863	-0.92273	-0.607311	-0.0918414	0.109971	0.627217	1.30018	0.720868	0.592714	0.0369118	NaN	NaN	NaN	NaN	NaN	NaN	NaN	NaN	NaN	NaN	NaN	NaN	NaN	NaN	NaN	NaN	NaN	NaN	NaN	NaN	NaN	NaN	NaN	NaN	NaN	NaN	NaN	NaN	NaN	NaN	2.29036	0.00512434	0.099	1.03673	P78410	Butyrophilin subfamily 3 member A2 OS=Homo sapiens OX=9606 GN=BTN3A2 PE=1 SV=2	>sp|P78410|BT3A2_HUMAN Butyrophilin subfamily 3 member A2 OS=Homo sapiens OX=9606 GN=BTN3A2 PE=1 SV=2	11	3	5
1.02743	0.591939	0.443101	0.209788	-0.567938	-0.713934	0.142143	-0.735623	-0.497567	-0.104044	0.403719	-0.00442717	0.959183	-0.190247	0.412445	-1.04949	-1.81327	-0.540013	0.826815	-0.585487	0.939626	-0.0353107	0.251082	0.230535	0.0699754	0.0847563	-0.825931	0.579581	-0.493902	-0.383684	0.863297	0.569742	0.771621	0.439681	-0.00402841	-0.912871	-0.771106	0.532631	0.928274	0.181629	3.1936	0.00064033	0.0991111	-0.676615	Q86UN3	Reticulon-4 receptor-like 2 OS=Homo sapiens OX=9606 GN=RTN4RL2 PE=1 SV=1	>sp|Q86UN3|R4RL2_HUMAN Reticulon-4 receptor-like 2 OS=Homo sapiens OX=9606 GN=RTN4RL2 PE=1 SV=1	30	11	108
1.05227	0.259642	0.862498	0.372615	-0.669028	-0.187256	0.81378	-0.124668	-0.656753	0.268631	0.892418	0.566088	1.81323	0.563359	1.19789	-0.717466	-1.53363	-0.992016	0.75134	-1.15151	0.500563	0.207336	0.0839123	-0.0308315	0.322619	0.257176	-1.1096	0.754019	-0.817102	-0.73127	0.989352	-0.483839	0.410067	0.756671	-0.346892	-1.32308	-1.08663	1.31928	0.151397	-0.231196	2.86107	0.00137699	0.0991351	-0.783325	Q99435	Protein kinase C-binding protein NELL2 OS=Homo sapiens OX=9606 GN=NELL2 PE=1 SV=1	>sp|Q99435|NELL2_HUMAN Protein kinase C-binding protein NELL2 OS=Homo sapiens OX=9606 GN=NELL2 PE=1 SV=1	65	40	768
-0.0261149	-3.86855	-1.08958	-2.94053	-2.28092	-0.810134	1.24483	-3.10353	-1.17845	-0.255031	-0.76618	-3.6338	-1.31613	-2.95249	-2.222	-1.18116	2.29928	0.198674	2.72343	-3.01289	-4.1572	-0.281073	-3.37108	0.348674	-4.08871	0.372062	-0.751896	-2.82944	1.74817	1.7641	-1.83399	-0.203698	-2.1296	1.02806	2.47428	4.23148	0.583538	1.1021	-0.54781	-2.68142	1.99922	0.010018	0.0991667	1.66133	P01591	Immunoglobulin J chain OS=Homo sapiens OX=9606 GN=JCHAIN PE=1 SV=4	>sp|P01591|IGJ_HUMAN Immunoglobulin J chain OS=Homo sapiens OX=9606 GN=JCHAIN PE=1 SV=4	64	7	77
0.636821	0.119681	0.95025	0.742645	0.54088	0.29341	0.771231	0.336448	-0.437359	-0.0486509	0.665553	0.364976	0.99347	0.440954	1.06663	-0.725643	-1.05312	-0.797521	0.578198	-0.469627	0.534878	-0.0971168	0.177734	-0.0277895	0.443298	0.0524077	-0.753473	0.466662	-0.116333	-0.806166	1.09216	-0.315965	0.540631	-0.19154	-0.549927	-1.67649	-0.818728	0.415094	-0.0621663	-0.257658	3.21977	0.000602873	0.0992632	-0.661886	Q9H1U4	Multiple epidermal growth factor-like domains protein 9 OS=Homo sapiens OX=9606 GN=MEGF9 PE=2 SV=3	>sp|Q9H1U4|MEGF9_HUMAN Multiple epidermal growth factor-like domains protein 9 OS=Homo sapiens OX=9606 GN=MEGF9 PE=2 SV=3	17	8	64
NaN	NaN	NaN	NaN	NaN	NaN	NaN	NaN	NaN	NaN	1.09238	-1.41499	-1.50003	1.85667	-2.13627	-1.32184	1.19362	0.89433	1.59224	2.5552	NaN	NaN	NaN	NaN	NaN	NaN	NaN	NaN	NaN	NaN	-2.21815	0.855456	-1.61522	-0.757761	-0.764039	1.32896	1.30447	0.437539	1.04944	0.564684	2.0532	0.00884713	0.0998095	1.62006	P09488	Glutathione S-transferase Mu 1 OS=Homo sapiens OX=9606 GN=GSTM1 PE=1 SV=3	>sp|P09488|GSTM1_HUMAN Glutathione S-transferase Mu 1 OS=Homo sapiens OX=9606 GN=GSTM1 PE=1 SV=3	24	5	6
0.983153	0.305587	0.626075	0.584129	0.203847	-0.591186	0.836962	-0.256122	-0.246938	-0.427778	0.236261	0.746902	0.702097	0.618102	0.180789	-0.335659	-1.12698	-0.39317	0.71479	-0.316906	1.11551	-0.341638	0.661162	0.230219	0.652983	0.576275	-1.0749	0.675327	-0.604909	-0.313518	1.04666	0.511938	0.6831	-0.0586204	-0.347125	-0.917036	-0.566807	0.698573	0.191701	0.278607	3.28406	0.00051992	0.099907	-0.62704	O94856	Neurofascin OS=Homo sapiens OX=9606 GN=NFASC PE=1 SV=4	>sp|O94856|NFASC_HUMAN Neurofascin OS=Homo sapiens OX=9606 GN=NFASC PE=1 SV=4	40	45	480
1.08302	0.449281	0.834889	0.299418	-0.365994	-0.235862	0.840826	-0.376382	-0.478478	0.236552	0.289071	1.20706	0.830978	0.824017	1.00468	-0.225595	-1.20435	-0.396339	0.388423	-0.848808	0.654381	-0.460451	0.41861	0.568038	0.513319	0.471554	-0.61388	0.679574	-0.313815	-0.0483543	0.682431	0.044176	0.736078	0.368005	-0.00274009	-0.721322	-0.429949	0.831836	0.488713	-0.0180122	3.12304	0.000753295	0.101103	-0.597596	E7ERL8	Neurexin-1-beta OS=Homo sapiens OX=9606 GN=NRXN1 PE=1 SV=1	>tr|E7ERL8|E7ERL8_HUMAN Neurexin-1-beta OS=Homo sapiens OX=9606 GN=NRXN1 PE=1 SV=1	47	55	847
0.745099	0.478154	0.449251	0.297226	0.0019529	-0.440209	0.511457	-1.00703	0.105947	0.0637195	0.151338	0.772472	0.456202	0.47019	0.395962	-0.235713	-0.502343	0.0327924	0.491786	-0.373993	0.545261	-0.625328	1.22215	0.36349	0.503803	0.135954	-0.590692	0.111988	-0.465542	-0.00309075	0.516023	0.430213	1.93174	0.714628	0.358898	-0.151666	-0.0962041	0.411274	0.97549	0.0110217	3.25893	0.000550892	0.102033	-0.559689	Q8NFY4	Semaphorin-6D OS=Homo sapiens OX=9606 GN=SEMA6D PE=1 SV=1	>sp|Q8NFY4|SEM6D_HUMAN Semaphorin-6D OS=Homo sapiens OX=9606 GN=SEMA6D PE=1 SV=1	20	18	156
NaN	NaN	NaN	NaN	NaN	NaN	NaN	NaN	NaN	NaN	NaN	NaN	NaN	NaN	NaN	NaN	NaN	NaN	NaN	NaN	NaN	NaN	NaN	NaN	NaN	NaN	NaN	NaN	NaN	NaN	-0.236186	0.30971	-0.195205	0.055324	0.944105	1.6676	1.80503	0.444535	2.23033	1.03226	1.97182	0.0106704	0.102452	1.2604	Q07075	Glutamyl aminopeptidase OS=Homo sapiens OX=9606 GN=ENPEP PE=1 SV=3	>sp|Q07075|AMPE_HUMAN Glutamyl aminopeptidase OS=Homo sapiens OX=9606 GN=ENPEP PE=1 SV=3	3	2	2
0.870545	0.000742215	1.10516	0.226498	-0.376701	0.0324195	0.286497	0.225728	-0.801219	0.378538	0.65669	0.539657	2.1668	0.0798597	1.10763	-0.647596	-1.3814	-0.528866	0.694612	-0.826183	0.386683	-0.296689	-0.176604	-0.108244	0.294062	0.0250377	-1.01897	0.498063	-0.764494	-1.19013	0.895614	-0.733518	0.639578	0.670502	-0.0538448	-1.25026	-0.819442	1.11042	-0.05044	-0.467199	2.70135	0.00198908	0.102667	-0.719465	O00533	Neural cell adhesion molecule L1-like protein OS=Homo sapiens OX=9606 GN=CHL1 PE=1 SV=4	>sp|O00533|NCHL1_HUMAN Neural cell adhesion molecule L1-like protein OS=Homo sapiens OX=9606 GN=CHL1 PE=1 SV=4	46	41	1137
0.911789	0.748238	0.683774	0.194696	-0.825545	-0.173938	0.338107	-0.204063	-1.03328	0.032737	1.08368	0.349021	2.02471	0.30512	1.37865	-0.679054	-1.89152	-1.0103	0.906702	-1.24187	0.283349	-0.217742	-0.104554	0.0311696	0.0584447	0.255812	-1.02302	0.800777	-0.145549	-0.953215	0.795252	-0.745211	0.396188	0.993234	-0.185149	-1.15438	-1.08179	1.19024	0.500863	-0.771936	2.53171	0.00293961	0.103733	-0.77489	Q9NTU7	Cerebellin-4 OS=Homo sapiens OX=9606 GN=CBLN4 PE=1 SV=1	>sp|Q9NTU7|CBLN4_HUMAN Cerebellin-4 OS=Homo sapiens OX=9606 GN=CBLN4 PE=1 SV=1	23	4	35
-0.0201241	0.0157564	-0.945415	-0.530562	-0.132637	1.7569	0.335829	0.159461	0.503797	0.671019	-0.488021	-0.665866	-1.15134	-1.03712	-0.525974	0.222323	0.687431	0.863447	-0.437971	0.689467	-0.538434	0.7954	-1.62233	0.681378	-0.695257	-0.141128	0.677837	-0.715829	-0.0714095	0.99652	-1.14776	0.114735	-1.79906	0.336536	0.186772	2.03644	0.302777	-0.928331	0.252854	-1.46944	2.53729	0.00290212	0.103797	0.778066	P59665	Neutrophil defensin 1 OS=Homo sapiens OX=9606 GN=DEFA1 PE=1 SV=1	>sp|P59665|DEF1_HUMAN Neutrophil defensin 1 OS=Homo sapiens OX=9606 GN=DEFA1 PE=1 SV=1	44	3	13
0.578558	0.493124	0.580852	0.502388	0.483797	-0.269082	0.607342	-0.357139	0.0453119	-0.0929121	0.758466	0.541511	0.417394	0.410499	0.295294	-0.323964	-0.57186	-0.00157275	0.536597	-0.670849	0.554347	-0.113071	0.489047	0.557282	0.024822	0.048152	-0.718495	0.549818	0.158344	-0.199272	0.523294	-0.0759945	0.325999	0.281144	0.11562	-0.600674	-0.365998	0.384346	0.224399	0.00794879	4.10258	7.89629e-05	0.104	-0.467696	P23471	Receptor-type tyrosine-protein phosphatase zeta OS=Homo sapiens OX=9606 GN=PTPRZ1 PE=1 SV=4	>sp|P23471|PTPRZ_HUMAN Receptor-type tyrosine-protein phosphatase zeta OS=Homo sapiens OX=9606 GN=PTPRZ1 PE=1 SV=4	14	32	515
-0.141345	-0.117165	0.00625001	-0.217375	0.836451	-1.86462	-0.720383	-0.236623	0.289435	0.131517	0.699632	0.94999	0.446561	0.226076	0.0802271	-1.64228	-0.508827	0.35214	0.476533	-0.371637	-0.994668	1.13458	-0.322799	0.204271	-0.147006	-0.307975	-0.645811	-0.848308	-0.654216	-0.216575	0.348267	1.02728	-0.0702278	-0.113942	-0.420227	-0.272559	-0.628019	-0.545495	-1.69703	0.0945518	2.88348	0.00130775	0.1048	-0.66155	P25774	Cathepsin S OS=Homo sapiens OX=9606 GN=CTSS PE=1 SV=3	>sp|P25774|CATS_HUMAN Cathepsin S OS=Homo sapiens OX=9606 GN=CTSS PE=1 SV=3	26	7	41
NaN	NaN	NaN	NaN	NaN	NaN	NaN	NaN	NaN	NaN	NaN	NaN	NaN	NaN	NaN	NaN	NaN	NaN	NaN	NaN	-0.34321	-0.300312	-0.0577016	-0.087033	-0.170154	0.265609	0.488878	0.282135	0.371788	1.16661	NaN	NaN	NaN	NaN	NaN	NaN	NaN	NaN	NaN	NaN	2.39941	0.00398652	0.110176	0.706686	O60936	Nucleolar protein 3 OS=Homo sapiens OX=9606 GN=NOL3 PE=1 SV=2	>sp|O60936|NOL3_HUMAN Nucleolar protein 3 OS=Homo sapiens OX=9606 GN=NOL3 PE=1 SV=2	21	2	2
1.05254	1.23854	0.454838	0.139812	-0.277601	-0.501378	0.955843	-0.834551	-0.314089	-0.098522	1.03703	-0.0787117	1.14866	0.291357	0.282787	-1.22265	-1.19119	-0.387667	0.746738	-0.36657	0.867097	-0.770266	0.521789	0.444987	-0.00596696	-0.323662	-1.39701	0.646785	-0.408258	-0.220928	1.11921	0.251403	0.817279	0.504232	-0.119563	-0.787915	-0.383431	1.05616	0.497662	0.20094	2.68559	0.00206259	0.110545	-0.662658	P23515	Oligodendrocyte-myelin glycoprotein OS=Homo sapiens OX=9606 GN=OMG PE=1 SV=2	>sp|P23515|OMGP_HUMAN Oligodendrocyte-myelin glycoprotein OS=Homo sapiens OX=9606 GN=OMG PE=1 SV=2	27	11	165
-0.799952	0.393752	-0.222329	-0.116869	0.776288	0.950598	1.98392	0.852801	0.0713256	0.871246	-0.516008	-1.46902	-1.17825	-0.0650933	-0.255771	-0.162064	2.38115	0.500473	-0.0768215	0.241545	0.289407	0.261294	-0.307814	0.251713	0.656335	0.97056	0.85575	-0.403003	0.678813	-0.493799	-0.0289618	-1.6469	-0.328512	-0.797083	-0.235513	-0.0588152	-0.910293	0.443931	0.0212354	0.451964	2.50486	0.00312706	0.111463	0.72549	P08138	Tumor necrosis factor receptor superfamily member 16 OS=Homo sapiens OX=9606 GN=NGFR PE=1 SV=1	>sp|P08138|TNR16_HUMAN Tumor necrosis factor receptor superfamily member 16 OS=Homo sapiens OX=9606 GN=NGFR PE=1 SV=1	13	4	36
1.27616	0.936636	0.613313	0.84076	-0.690724	-1.2649	0.762515	-1.41366	-0.899598	-0.550122	-0.0812734	0.692338	0.193773	0.811909	0.552579	-0.865375	-1.60123	-1.10862	0.937659	-0.980554	1.05723	-1.20298	0.363515	1.05044	-0.383405	-0.0493991	-1.09457	0.649992	0.147396	0.106751	1.22324	0.592639	-0.0133954	-0.243584	-0.201941	-0.790712	-0.309116	0.475262	0.698534	-0.213098	2.49883	0.00317077	0.111508	-0.737504	P48058	Glutamate receptor 4 OS=Homo sapiens OX=9606 GN=GRIA4 PE=1 SV=2	>sp|P48058|GRIA4_HUMAN Glutamate receptor 4 OS=Homo sapiens OX=9606 GN=GRIA4 PE=1 SV=2	20	17	218
-3.82028	-4.565	-4.25658	-4.76628	-3.34036	-2.25795	-5.02309	4.65487	-5.00303	-2.22188	-2.50511	-3.71426	-3.11803	0.823186	-3.85743	3.09241	-0.389806	-1.25928	-2.39953	-0.42359	-4.04965	-2.22748	-4.10093	-2.9395	-3.62183	-3.04225	-2.84151	-3.18116	8.38255	-1.93427	1.87409	-2.58771	-2.24332	-2.95173	-3.06719	2.63464	-2.33696	-1.9128	-3.40353	1.39897	1.75272	0.0176717	0.111683	2.07841	P07451	Carbonic anhydrase 3 OS=Homo sapiens OX=9606 GN=CA3 PE=1 SV=3	>sp|P07451|CAH3_HUMAN Carbonic anhydrase 3 OS=Homo sapiens OX=9606 GN=CA3 PE=1 SV=3	49	10	46
-1.24137	0.247826	-0.285201	-0.986803	-0.222221	-0.70407	-0.487298	-0.224418	0.318901	0.178875	-0.805503	-0.51373	-1.25943	-0.151954	-1.6303	-0.971363	0.373605	-0.748236	4.00431	2.08434	-1.78549	0.884687	-1.79609	-1.30895	-2.24162	-0.823432	1.69435	-1.33239	-0.362388	1.9135	NaN	NaN	NaN	NaN	NaN	NaN	NaN	NaN	NaN	NaN	1.95813	0.0110121	0.112058	1.2007	P10720	Platelet factor 4 variant OS=Homo sapiens OX=9606 GN=PF4V1 PE=1 SV=1	>sp|P10720|PF4V_HUMAN Platelet factor 4 variant OS=Homo sapiens OX=9606 GN=PF4V1 PE=1 SV=1	25	2	3
1.16845	0.51985	0.544664	0.592367	-0.0776426	-0.319595	0.608293	-0.765196	-0.251848	-0.204608	0.172063	0.598547	0.390376	0.444324	0.38731	-0.696045	-0.834511	-0.138485	0.744905	-0.561369	1.02348	-0.694711	0.432172	0.696589	0.412396	0.256051	-0.722964	0.596386	-0.782675	-0.122375	0.75819	0.0462437	0.204377	0.114264	-0.150478	-0.775632	-0.351876	0.309404	0.763117	-0.243184	3.04383	0.000903994	0.112451	-0.553751	Q9HC56	Protocadherin-9 OS=Homo sapiens OX=9606 GN=PCDH9 PE=1 SV=2	>sp|Q9HC56|PCDH9_HUMAN Protocadherin-9 OS=Homo sapiens OX=9606 GN=PCDH9 PE=1 SV=2	30	30	200
0.507455	0.445707	0.551346	0.457256	-0.312502	0.0911282	0.6205	-0.953032	-0.0987451	-0.699179	0.29897	0.388364	-0.369371	0.454341	0.276185	-0.747714	-0.801362	-1.09607	0.375638	-0.422717	1.06675	0.316841	0.637723	0.705837	0.775669	1.03179	0.0948664	0.808717	-0.331661	0.420114	0.793366	-0.0197747	0.724381	0.724069	-0.188156	-0.628868	-0.598331	-0.10932	0.09273	-0.277748	3.036	0.000920454	0.112562	-0.573186	E9PBG7	Calcium/calmodulin-dependent protein kinase type II subunit delta OS=Homo sapiens OX=9606 GN=CAMK2D PE=1 SV=1	>tr|E9PBG7|E9PBG7_HUMAN Calcium/calmodulin-dependent protein kinase type II subunit delta OS=Homo sapiens OX=9606 GN=CAMK2D PE=1 SV=1	22	9	91
-0.612613	-0.375375	-0.959375	-0.616358	0.112399	1.41807	-0.0180246	0.628017	0.115328	0.147346	-0.432938	-1.70765	0.114555	-0.843033	-0.455039	0.282578	1.00691	0.378852	-0.134955	0.583679	0.7464	0.76884	-0.286242	0.0544309	-0.102664	1.02671	1.29093	0.178306	0.537891	0.0476361	-0.160204	0.25395	-0.140933	1.04551	-0.891602	0.797167	0.455442	-0.102067	-0.45595	-0.240163	2.727	0.00187499	0.113041	0.621582	K7ERG9	Complement factor D OS=Homo sapiens OX=9606 GN=CFD PE=1 SV=1	>tr|K7ERG9|K7ERG9_HUMAN Complement factor D OS=Homo sapiens OX=9606 GN=CFD PE=1 SV=1	54	10	106
0.848257	0.0499546	0.81052	0.645412	-0.315538	-0.0474897	0.735751	-0.696046	-0.234369	0.0106809	0.00121218	1.06746	0.0572357	0.331849	0.638636	-0.479251	-0.968172	-0.577545	-0.0165566	-0.691643	1.17587	0.0673145	0.579166	0.637035	1.38234	0.624458	-0.605013	0.725407	-0.462001	0.113074	0.984765	0.569987	0.767429	-0.54086	-0.092841	-0.727228	0.148106	0.477711	0.454114	0.249797	2.91035	0.00122927	0.113943	-0.581571	O75078	Disintegrin and metalloproteinase domain-containing protein 11 OS=Homo sapiens OX=9606 GN=ADAM11 PE=2 SV=3	>sp|O75078|ADA11_HUMAN Disintegrin and metalloproteinase domain-containing protein 11 OS=Homo sapiens OX=9606 GN=ADAM11 PE=2 SV=3	36	17	118
1.56864	0.810286	0.55931	1.08259	-0.235352	-1.11611	0.433049	-1.00631	-0.0221728	-0.888722	-0.0334831	0.977602	0.147895	0.933968	-0.0622847	-0.179971	-0.808729	-0.179279	1.11651	-0.587164	1.29738	-1.15064	0.987788	0.868095	-0.091164	0.232827	-0.782873	0.786959	-0.367632	0.563052	1.15843	1.34537	0.761325	0.185904	-0.217661	-0.68333	-0.148067	0.181869	0.725691	0.141297	2.52498	0.00298551	0.114182	-0.674155	O75326	Semaphorin-7A OS=Homo sapiens OX=9606 GN=SEMA7A PE=1 SV=1	>sp|O75326|SEM7A_HUMAN Semaphorin-7A OS=Homo sapiens OX=9606 GN=SEMA7A PE=1 SV=1	50	31	494
NaN	NaN	NaN	NaN	NaN	NaN	NaN	NaN	NaN	NaN	-0.101622	-1.46248	-0.0525405	-0.286306	0.493124	0.97328	1.58562	1.06196	-0.353753	0.574858	-0.970554	-0.77906	0.0624936	0.189317	-0.0268454	0.57612	0.0731553	0.00277038	0.0131867	0.239984	-0.330478	0.146087	0.307686	-0.485868	-0.213333	-0.160135	0.723544	0.142253	-0.018609	0.67356	2.62563	0.00236791	0.114216	0.641212	P32971	Tumor necrosis factor ligand superfamily member 8 OS=Homo sapiens OX=9606 GN=TNFSF8 PE=2 SV=1	>sp|P32971|TNFL8_HUMAN Tumor necrosis factor ligand superfamily member 8 OS=Homo sapiens OX=9606 GN=TNFSF8 PE=2 SV=1	9	2	10
0.490973	0.446573	0.803613	0.340295	-0.326303	0.229795	0.53765	-0.42109	-0.422034	-0.31266	0.0374322	0.687359	0.205047	0.461001	0.72895	-0.324923	-1.27329	-0.527135	-0.0392947	-0.653753	0.211707	0.0791228	-0.041913	-0.163503	0.35492	0.375432	-0.305795	0.31444	-0.611997	-0.255486	0.191303	-0.100093	0.338888	0.0927071	-0.569413	-0.831251	-0.956814	-0.247838	-0.0967218	0.0983887	3.35428	0.000442303	0.114611	-0.499652	Q13554	Calcium/calmodulin-dependent protein kinase type II subunit beta OS=Homo sapiens OX=9606 GN=CAMK2B PE=1 SV=3	>sp|Q13554|KCC2B_HUMAN Calcium/calmodulin-dependent protein kinase type II subunit beta OS=Homo sapiens OX=9606 GN=CAMK2B PE=1 SV=3	18	9	75
-0.228392	0.209759	-0.594983	-0.452006	-0.222312	-0.017382	-1.05855	0.716843	-1.05495	-0.678128	0.263701	0.216669	0.836459	0.348667	0.800738	-0.634502	-0.567899	0.0152943	-0.394107	-0.498673	0.482257	0.11001	0.0419344	0.611026	0.141006	0.11247	-0.59613	0.0745845	0.0346077	-0.195614	0.637911	0.368328	0.47099	0.173486	0.149277	-0.153353	-0.182423	0.363476	-0.319263	-0.631065	3.29219	0.000510286	0.115307	-0.501464	Q13228	Methanethiol oxidase OS=Homo sapiens OX=9606 GN=SELENBP1 PE=1 SV=2	>sp|Q13228|SBP1_HUMAN Methanethiol oxidase OS=Homo sapiens OX=9606 GN=SELENBP1 PE=1 SV=2	68	31	179
1.42369	0.751361	0.609443	0.41851	-0.0166216	-0.309054	0.764188	-0.912683	-0.0771719	-0.649332	-0.236981	0.995614	-0.00700741	0.421569	0.0176371	-0.448683	-1.17475	-0.245287	0.175607	-0.574952	0.817015	-0.295022	1.28479	1.42859	0.488394	0.770377	-0.36752	0.882036	-0.116687	0.6004	0.624136	1.33464	0.464856	0.0817761	-0.208803	-0.691434	-0.136949	-0.00222262	0.446212	0.310546	2.73062	0.00185942	0.115632	-0.607747	Q06481	Amyloid-like protein 2 OS=Homo sapiens OX=9606 GN=APLP2 PE=1 SV=2	>sp|Q06481|APLP2_HUMAN Amyloid-like protein 2 OS=Homo sapiens OX=9606 GN=APLP2 PE=1 SV=2	44	34	630
0.699868	0.73678	0.871369	0.453976	-0.488985	-0.342998	0.744675	-0.146706	-0.455723	-0.139011	0.0908713	0.492114	0.305314	0.942682	0.467907	-0.191123	-0.694841	-0.256246	0.452409	-0.330425	0.04431	-0.0804386	0.0622385	1.19684	0.148638	0.270205	-0.416906	0.366682	-0.178111	-0.104743	0.894772	0.0136042	0.89201	0.301527	0.285495	-0.308951	-0.308973	0.607517	0.124271	-0.130383	3.32997	0.000467771	0.115949	-0.488514	Q15904	V-type proton ATPase subunit S1 OS=Homo sapiens OX=9606 GN=ATP6AP1 PE=1 SV=2	>sp|Q15904|VAS1_HUMAN V-type proton ATPase subunit S1 OS=Homo sapiens OX=9606 GN=ATP6AP1 PE=1 SV=2	26	7	151
-1.44318	-0.29962	-0.96144	-2.92388	-0.533838	-0.17054	0.274952	0.646311	-0.263003	1.0922	-0.830356	0.623825	0.226839	-3.11188	-0.239673	0.732865	0.49808	-0.560559	0.115929	-0.814271	-0.474837	1.62492	-2.65148	-1.6036	-3.28415	-0.893328	-1.00682	-0.391862	-0.436052	-2.0738	-3.27865	-1.00961	-2.92177	-0.1114	0.369764	0.652511	0.964614	3.12754	-1.05454	-1.28808	1.95668	0.011049	0.116051	1.09931	A0A075B6R2	Immunoglobulin heavy variable 4-4 OS=Homo sapiens OX=9606 GN=IGHV4-4 PE=3 SV=2	>sp|A0A075B6R2|HV404_HUMAN Immunoglobulin heavy variable 4-4 OS=Homo sapiens OX=9606 GN=IGHV4-4 PE=3 SV=2	44	5	78
-0.345481	0.166705	-0.411461	-0.14929	0.019977	0.426163	-0.466959	0.112761	-0.0698884	0.0350533	-0.577272	-0.352202	-0.306474	-0.382466	-0.47236	0.864227	0.612209	0.715495	-0.526686	0.878605	0.0959913	-0.367771	-0.0615884	0.599753	-0.172504	0.111123	0.622905	0.547076	0.132848	0.341513	-0.796034	-0.966335	0.0332985	0.186534	-0.00747843	0.170374	0.227681	0.127021	0.130505	0.0677012	3.49982	0.000316357	0.1162	0.466309	F5GYJ8	Ubiquitin thioesterase OTUB1 OS=Homo sapiens OX=9606 GN=OTUB1 PE=1 SV=1	>tr|F5GYJ8|F5GYJ8_HUMAN Ubiquitin thioesterase OTUB1 OS=Homo sapiens OX=9606 GN=OTUB1 PE=1 SV=1	21	5	13
2.31628	-3.99742	-2.66975	-0.84342	-1.27375	-0.783414	1.67573	-1.44375	0.658601	-1.25162	-2.37941	-1.37392	-1.59376	0.329944	0.749867	-2.25483	2.05685	2.02427	1.94635	2.39903	1.96702	-2.9816	-1.72342	-0.275993	-0.770403	-0.287481	1.07475	3.95713	2.13285	5.37481	-0.888163	-1.2789	-3.68592	-6.70262	2.36271	0.354001	0.864083	-3.3642	-1.763	-3.2285	1.70123	0.0198962	0.117659	1.74271	P00738	Haptoglobin OS=Homo sapiens OX=9606 GN=HP PE=1 SV=1	>sp|P00738|HPT_HUMAN Haptoglobin OS=Homo sapiens OX=9606 GN=HP PE=1 SV=1	69	32	1562
0.40088	0.36307	0.859266	0.524798	-0.0647666	-0.327493	0.591681	0.0453567	-0.588702	0.237184	0.757599	0.26368	0.717378	0.228748	0.676844	-0.146725	-0.837307	-0.574706	-0.712461	-0.629137	0.219598	-0.196045	-0.566795	0.0638494	-0.142918	-0.149917	-0.964849	0.4514	-0.390564	-0.981373	0.59443	-0.232584	0.436691	0.729358	-0.0797281	-0.550267	-0.733071	0.932416	0.298501	-0.106357	2.9872	0.00102992	0.118123	-0.534487	E7EWD3	Disintegrin and metalloproteinase domain-containing protein 23 OS=Homo sapiens OX=9606 GN=ADAM23 PE=1 SV=2	>tr|E7EWD3|E7EWD3_HUMAN Disintegrin and metalloproteinase domain-containing protein 23 OS=Homo sapiens OX=9606 GN=ADAM23 PE=1 SV=2	21	12	56
1.14359	-0.609808	1.12013	0.667845	1.28336	0.43209	0.571205	0.937075	-1.3879	-1.74212	-1.16335	0.734498	-1.45744	1.60663	-1.4633	-1.37385	-0.657231	-1.32779	1.56837	0.970603	1.90611	0.766409	-0.0793612	1.48135	2.02802	-3.80977	0.784127	-1.45465	-0.407118	-1.89554	1.17927	1.15806	1.21649	-0.106775	0.56722	0.298254	1.04654	0.383642	-0.391342	-0.974673	1.9577	0.0110231	0.121667	-1.02045	Q9BTY2	Plasma alpha-L-fucosidase OS=Homo sapiens OX=9606 GN=FUCA2 PE=1 SV=2	>sp|Q9BTY2|FUCO2_HUMAN Plasma alpha-L-fucosidase OS=Homo sapiens OX=9606 GN=FUCA2 PE=1 SV=2	53	23	185
1.08502	0.00973043	-0.703296	-0.934515	-0.820335	0.211333	-0.8259	1.00231	-0.517328	-0.493606	-0.494338	-0.954391	-0.646082	-1.07348	-1.31703	0.102192	-0.16036	-0.299893	-0.925297	1.0639	-1.14766	0.309466	-1.29769	-1.12817	-0.738719	-1.53122	0.422585	-0.836375	0.494671	0.630514	-0.658461	-0.540918	-0.816218	-1.05289	-1.05056	0.763624	0.467043	0.318826	-0.538638	-0.388233	2.5047	0.00312827	0.121928	0.646534	Q5HYB6	Epididymis luminal protein 189 OS=Homo sapiens OX=9606 GN=TPM3 PE=1 SV=1	>tr|Q5HYB6|Q5HYB6_HUMAN Epididymis luminal protein 189 OS=Homo sapiens OX=9606 GN=TPM3 PE=1 SV=1	36	10	30
-3.04216	-2.28539	-3.18086	-3.762	-2.86285	-1.845	-3.09957	5.36724	-3.77582	-1.42149	-2.64814	-3.13105	-2.96126	1.77536	-3.73495	4.71964	-0.100437	-1.37612	-2.95051	-1.24375	-3.2894	-1.66047	-3.54845	-3.50289	-3.09254	-2.73181	-2.81448	-2.68036	8.285	-2.06294	2.39287	-2.77348	-2.25992	-3.1012	-2.88666	2.98871	-1.90678	-0.883902	-3.22807	-0.00900266	1.62548	0.0236874	0.122607	1.9393	180	MYG_HUMAN	>gi|180| MYG_HUMAN	55	7	53
0.965974	0.0524407	0.783318	0.480278	0.492268	-0.756119	0.586526	-0.0649037	-0.0149013	-0.250493	-0.00992292	0.836443	0.299898	1.15879	-0.157514	-0.341873	-0.230064	0.814576	0.462825	0.155248	0.730332	-0.532977	0.690127	0.92819	0.342761	0.522249	-0.526573	0.602177	0.080824	0.0633045	1.39107	1.64099	1.07039	0.589576	0.570607	-0.498129	0.297122	-0.493207	0.38888	0.706729	2.84443	0.00143076	0.123455	-0.540942	P07602	Prosaposin OS=Homo sapiens OX=9606 GN=PSAP PE=1 SV=2	>sp|P07602|SAP_HUMAN Prosaposin OS=Homo sapiens OX=9606 GN=PSAP PE=1 SV=2	64	27	459
0.523821	0.241289	0.266012	0.0601117	1.11524	-0.972006	-0.194296	-0.397974	-0.310287	-0.824663	0.345131	0.429445	0.167455	0.928618	0.306877	0.336882	0.540975	0.927636	-0.124451	0.38824	1.06036	-0.286797	0.781108	1.01042	0.600255	-0.0388984	-0.789977	0.352668	-0.406764	0.190285	0.375709	1.44146	0.308804	-0.191389	0.290297	-0.393862	0.286065	-0.830626	0.433715	0.699847	2.82432	0.00149859	0.124828	-0.545085	P06865	Beta-hexosaminidase subunit alpha OS=Homo sapiens OX=9606 GN=HEXA PE=1 SV=2	>sp|P06865|HEXA_HUMAN Beta-hexosaminidase subunit alpha OS=Homo sapiens OX=9606 GN=HEXA PE=1 SV=2	52	23	192
1.36417	0.514133	0.412133	0.43356	-0.523256	-1.09403	0.792475	-1.55127	-0.661235	-0.870268	-0.0890353	1.13809	-0.286497	1.24055	0.239369	-0.381013	-0.8787	-0.229552	0.280894	-0.818092	0.993433	-0.637278	1.04736	1.64255	0.252441	1.05464	-0.995541	0.789304	-0.283455	0.621874	1.18185	0.593317	0.273833	-0.332227	-0.438013	-0.500229	-0.27052	-0.231257	0.729024	-0.182055	2.37526	0.00421446	0.125412	-0.684974	Q9NS85	Carbonic anhydrase-related protein 10 OS=Homo sapiens OX=9606 GN=CA10 PE=2 SV=1	>sp|Q9NS85|CAH10_HUMAN Carbonic anhydrase-related protein 10 OS=Homo sapiens OX=9606 GN=CA10 PE=2 SV=1	27	6	39
NaN	NaN	NaN	NaN	NaN	NaN	NaN	NaN	NaN	NaN	NaN	NaN	NaN	NaN	NaN	NaN	NaN	NaN	NaN	NaN	2.07656	1.02984	0.618322	1.19233	1.63442	0.948062	0.863222	-0.376167	-0.890828	-0.644914	NaN	NaN	NaN	NaN	NaN	NaN	NaN	NaN	NaN	NaN	1.69058	0.0203903	0.125526	-1.33042	P24855	Deoxyribonuclease-1 OS=Homo sapiens OX=9606 GN=DNASE1 PE=1 SV=1	>sp|P24855|DNAS1_HUMAN Deoxyribonuclease-1 OS=Homo sapiens OX=9606 GN=DNASE1 PE=1 SV=1	13	2	7
1.01638	0.611557	0.108371	0.736745	0.57142	-0.627088	0.380003	-1.14039	-0.30438	-0.598447	-0.11672	0.352212	0.158464	0.732817	-0.128891	-0.505394	-0.316739	0.18591	0.693713	-0.309811	1.00127	-0.812235	0.813051	0.862376	0.165771	0.37838	-0.888158	0.134602	-0.549163	0.1218	0.70007	0.94666	0.183476	0.0265916	-0.230946	-0.545716	0.134357	-0.586889	0.907685	0.240815	2.71251	0.00193861	0.125673	-0.544667	Q5VU97	VWFA and cache domain-containing protein 1 OS=Homo sapiens OX=9606 GN=CACHD1 PE=2 SV=2	>sp|Q5VU97|CAHD1_HUMAN VWFA and cache domain-containing protein 1 OS=Homo sapiens OX=9606 GN=CACHD1 PE=2 SV=2	24	26	166
0.639054	0.0787844	1.67149	0.705329	-0.549616	-0.275826	0.616264	-0.0996533	-0.859815	-0.26717	-0.0528564	1.74393	0.0972977	1.82512	0.747926	0.995347	-1.38762	-0.540371	0.365958	-0.911402	0.382715	0.136998	0.296861	0.316051	1.1697	0.5592	-0.541288	0.267608	0.406419	-0.655404	1.15116	-0.270242	0.78891	-0.153907	-0.193131	-0.727134	-0.264804	0.62432	-0.0836489	0.34248	2.42625	0.00374754	0.126	-0.648405	P05060	Secretogranin-1 OS=Homo sapiens OX=9606 GN=CHGB PE=1 SV=2	>sp|P05060|SCG1_HUMAN Secretogranin-1 OS=Homo sapiens OX=9606 GN=CHGB PE=1 SV=2	61	46	1958
0.901392	-0.0590247	1.28415	0.683834	-0.40695	0.269417	0.344631	0.456375	-0.786835	0.43165	0.803495	0.659975	1.33379	1.07338	0.930678	-0.238449	-0.34762	0.0384928	0.549503	-0.64989	0.321894	0.246515	0.3658	0.240129	0.592566	0.567443	-0.0755099	0.834754	-0.306631	-0.980683	1.53264	-0.0351134	1.19031	0.779775	0.0785261	-0.993027	-0.881413	1.48255	0.477025	0.15745	2.57237	0.00267691	0.126279	-0.608427	Q9ULF5	Zinc transporter ZIP10 OS=Homo sapiens OX=9606 GN=SLC39A10 PE=1 SV=2	>sp|Q9ULF5|S39AA_HUMAN Zinc transporter ZIP10 OS=Homo sapiens OX=9606 GN=SLC39A10 PE=1 SV=2	12	8	87
0.6196	-0.104631	0.616728	0.831511	0.504818	0.038367	0.527136	0.027295	0.0512899	-0.0986531	0.526449	0.905868	0.610578	0.368462	0.803907	0.0696693	-0.705254	-0.820179	-0.169324	-0.507475	0.252796	-0.0995716	0.0984284	-0.0616015	0.715433	0.11198	0.0214621	0.0821494	-0.427921	-0.332004	0.0679003	-0.286877	0.000122453	0.0453515	-0.320844	-0.806871	-0.417499	0.0839163	0.291123	-0.0233357	3.29584	0.000506016	0.126625	-0.454928	Q6UXK5	Leucine-rich repeat neuronal protein 1 OS=Homo sapiens OX=9606 GN=LRRN1 PE=1 SV=1	>sp|Q6UXK5|LRRN1_HUMAN Leucine-rich repeat neuronal protein 1 OS=Homo sapiens OX=9606 GN=LRRN1 PE=1 SV=1	25	14	95
0.806181	0.214818	0.655051	0.36426	-0.677299	-0.598266	0.762653	-0.620873	-0.260759	0.0798563	0.114688	0.759478	0.817383	0.917589	0.64209	-0.482194	-1.48121	-0.75786	0.624344	-0.459945	0.98744	-0.361189	0.240509	0.38742	0.0970668	0.262303	-0.858938	0.519908	0.0416889	-0.322167	0.691602	-0.447983	0.571456	0.11751	-0.0806271	-0.941984	-0.769245	0.604758	0.250773	-0.0760345	2.64011	0.00229029	0.127789	-0.565032	Q7Z3B1	Neuronal growth regulator 1 OS=Homo sapiens OX=9606 GN=NEGR1 PE=1 SV=3	>sp|Q7Z3B1|NEGR1_HUMAN Neuronal growth regulator 1 OS=Homo sapiens OX=9606 GN=NEGR1 PE=1 SV=3	36	13	225
0.705398	0.373834	0.447006	0.817737	-0.195867	-0.0231608	0.433789	-0.911058	-0.0993053	-0.120548	0.348815	0.527762	0.0130066	0.743884	0.473425	-0.516882	-0.518971	-0.0265947	0.540576	-0.549602	0.610375	-0.314565	0.456732	0.657903	0.190076	0.326217	-0.840457	0.572338	-0.150721	-0.110048	0.606496	0.116814	0.658596	-0.143431	0.161997	-0.813991	-0.658817	0.2863	0.691191	0.118318	3.02768	0.000938263	0.12784	-0.481371	E7EUW2	Adhesion G protein-coupled receptor L3 OS=Homo sapiens OX=9606 GN=ADGRL3 PE=1 SV=1	>tr|E7EUW2|E7EUW2_HUMAN Adhesion G protein-coupled receptor L3 OS=Homo sapiens OX=9606 GN=ADGRL3 PE=1 SV=1	23	29	227
1.16162	0.0311677	0.551785	0.757335	-0.218408	0.035549	0.638741	-0.0775034	-0.362891	0.198826	0.498163	-0.0541773	1.05275	0.225936	0.587509	-1.32598	-1.98046	-1.42654	0.937681	-0.653045	0.979977	0.111238	-0.422033	-0.177098	0.131343	-0.023201	-0.966306	0.180785	-0.352736	-1.16799	0.848779	-0.909409	0.241348	0.335116	-0.2785	-1.46828	-1.04505	0.955623	0.424019	-0.390179	2.29981	0.00501402	0.128081	-0.66617	P54289	Voltage-dependent calcium channel subunit alpha-2/delta-1 OS=Homo sapiens OX=9606 GN=CACNA2D1 PE=1 SV=3	>sp|P54289|CA2D1_HUMAN Voltage-dependent calcium channel subunit alpha-2/delta-1 OS=Homo sapiens OX=9606 GN=CACNA2D1 PE=1 SV=3	48	46	688
0.911667	-0.148268	0.985114	-0.122286	-0.456846	0.432587	0.6048	-0.0160657	-0.702798	0.992644	1.66462	0.697179	1.64075	0.557154	1.98615	-1.29168	-2.18711	-0.601754	1.17825	-0.754662	0.591498	0.151377	-0.623595	-0.472114	-0.128775	-0.0307142	-1.2869	0.144632	-1.13746	-1.31236	0.567564	-0.787418	0.685541	0.947775	-0.427614	-1.69865	-1.70816	1.13499	0.483128	-0.203968	2.08108	0.00829707	0.128766	-0.809037	Q9NY72	Sodium channel subunit beta-3 OS=Homo sapiens OX=9606 GN=SCN3B PE=1 SV=1	>sp|Q9NY72|SCN3B_HUMAN Sodium channel subunit beta-3 OS=Homo sapiens OX=9606 GN=SCN3B PE=1 SV=1	25	4	21
0.750663	-0.322624	0.0658985	0.294316	-0.311164	-0.709223	0.315415	-1.24875	-0.245118	-0.137746	0.29612	0.760792	0.0597988	1.05567	0.488079	-0.723354	-0.922589	-0.66582	0.138475	-0.63795	0.956219	-0.383494	0.38662	0.514195	0.235495	0.192794	-0.56919	0.37315	0.0309033	0.160977	0.77068	-0.136016	0.387599	-0.172396	0.355129	0.101689	-0.0236121	0.194089	0.535341	-0.300427	2.91372	0.00121976	0.129462	-0.509626	Q9NY47	Voltage-dependent calcium channel subunit alpha-2/delta-2 OS=Homo sapiens OX=9606 GN=CACNA2D2 PE=1 SV=2	>sp|Q9NY47|CA2D2_HUMAN Voltage-dependent calcium channel subunit alpha-2/delta-2 OS=Homo sapiens OX=9606 GN=CACNA2D2 PE=1 SV=2	32	32	138
0.721785	0.530083	-0.0180581	-0.102439	0.204456	-0.77701	0.393662	-0.926361	0.237657	-0.616773	0.749826	0.527473	0.278533	0.457256	0.161433	-0.70975	0.247978	0.394272	0.581795	-0.347238	0.958458	-0.146788	0.583075	1.06404	0.257823	0.653645	-0.594152	0.673092	-0.61893	0.368932	1.05147	0.896733	0.365395	0.146836	-0.0842724	-0.663478	-0.201317	-0.353808	0.603812	-0.167208	2.85694	0.00139014	0.130261	-0.521215	P11279	Lysosome-associated membrane glycoprotein 1 OS=Homo sapiens OX=9606 GN=LAMP1 PE=1 SV=3	>sp|P11279|LAMP1_HUMAN Lysosome-associated membrane glycoprotein 1 OS=Homo sapiens OX=9606 GN=LAMP1 PE=1 SV=3	13	6	44
0.212367	0.348047	0.119943	0.227112	-0.0510492	0.575981	0.302074	1.08459	0.511323	0.319702	0.0410805	-1.28151	0.414548	-0.854536	-0.276713	0.169562	0.680077	0.0905127	0.158587	0.834653	0.0556631	0.278595	-0.0370525	-0.196811	0.131892	0.634997	1.28655	0.604377	1.11095	0.259315	0.294114	-0.475925	0.193658	0.893415	-0.134031	0.780292	-0.317889	1.06008	-0.72417	1.03682	2.82443	0.00149819	0.131341	0.527779	P04080	Cystatin-B OS=Homo sapiens OX=9606 GN=CSTB PE=1 SV=2	>sp|P04080|CYTB_HUMAN Cystatin-B OS=Homo sapiens OX=9606 GN=CSTB PE=1 SV=2	86	6	34
-0.430785	-1.19637	-1.35213	-1.18592	0.0307326	-0.140566	-0.390086	-2.30313	-1.46911	4.06247	-0.126456	-0.484323	-0.442794	0.167632	-0.0406865	1.16836	1.73392	0.0408469	-1.07411	-0.0990595	-1.8376	-0.0341984	-2.18198	-1.05289	-1.85005	-1.35206	0.920964	-0.160696	0.244203	1.42517	-3.9965	-0.710026	-3.35149	0.865825	0.882361	1.26252	0.594448	-0.15203	0.601318	-1.67243	1.79587	0.0160005	0.132911	1.07843	P01699	Immunoglobulin lambda variable 1-44 OS=Homo sapiens OX=9606 GN=IGLV1-44 PE=1 SV=2	>sp|P01699|LV144_HUMAN Immunoglobulin lambda variable 1-44 OS=Homo sapiens OX=9606 GN=IGLV1-44 PE=1 SV=2	38	2	38
-0.540111	0.0166315	0.40742	0.255581	0.620078	0.184892	-0.266679	0.653162	0.449563	0.0668041	NaN	NaN	NaN	NaN	NaN	NaN	NaN	NaN	NaN	NaN	-0.525612	0.199496	0.13974	-0.889132	-0.480625	0.297603	0.805956	0.515202	0.712502	0.965086	-0.629362	0.104869	-0.865359	-1.71222	-0.138283	-0.434989	0.909672	-0.487246	0.0923874	0.853301	2.34392	0.00452978	0.133059	0.623607	O00300	Tumor necrosis factor receptor superfamily member 11B OS=Homo sapiens OX=9606 GN=TNFRSF11B PE=1 SV=3	>sp|O00300|TR11B_HUMAN Tumor necrosis factor receptor superfamily member 11B OS=Homo sapiens OX=9606 GN=TNFRSF11B PE=1 SV=3	16	6	10
NaN	NaN	NaN	NaN	NaN	NaN	NaN	NaN	NaN	NaN	0.190095	-0.468677	0.0792546	-0.902851	-0.497362	0.771606	1.25448	0.464202	-0.324349	0.467852	0.0917045	-0.54631	-0.696241	0.292536	0.116576	0.227386	1.12062	0.787795	0.551079	0.184536	0.254974	-0.310788	0.925011	0.220648	0.680638	-0.33394	1.91444	1.51866	-0.273461	0.806296	2.22352	0.00597693	0.134667	0.6472	Q9NZD2	Glycolipid transfer protein OS=Homo sapiens OX=9606 GN=GLTP PE=1 SV=3	>sp|Q9NZD2|GLTP_HUMAN Glycolipid transfer protein OS=Homo sapiens OX=9606 GN=GLTP PE=1 SV=3	16	3	9
0.670374	0.386242	1.84634	0.462609	-0.797682	-0.0288497	0.840653	0.622191	-0.987943	0.0266067	0.31264	0.826701	0.796723	0.563779	0.969739	-0.219366	-0.745946	-0.707449	1.2463	-1.25471	1.36108	0.389123	0.486413	-0.335809	0.654076	0.306571	-1.53717	0.734528	-0.615993	-0.561293	1.32186	-0.340589	1.07262	-0.0771788	-0.699577	-0.81354	-0.194677	1.02192	-0.172181	-0.408865	2.18899	0.00647154	0.134857	-0.665935	Q8WXD2	Secretogranin-3 OS=Homo sapiens OX=9606 GN=SCG3 PE=1 SV=3	>sp|Q8WXD2|SCG3_HUMAN Secretogranin-3 OS=Homo sapiens OX=9606 GN=SCG3 PE=1 SV=3	69	33	658
0.110625	-0.123523	0.0688835	-0.0304	0.495611	0.330533	-0.454799	1.19567	0.323323	0.324994	-0.388179	-0.209327	-0.543749	-0.218041	0.415828	0.590473	0.442976	0.555747	-0.27007	0.598349	-0.0605649	-0.711331	-0.0815182	-0.437598	-0.429316	-0.228682	0.330693	0.0523308	0.907125	0.0133385	-0.160803	-0.475035	0.378933	-0.0890795	-0.198042	0.266273	-0.188286	1.00078	-0.247984	0.909598	3.04853	0.000894274	0.135673	0.456951	P15121	Aldose reductase OS=Homo sapiens OX=9606 GN=AKR1B1 PE=1 SV=3	>sp|P15121|ALDR_HUMAN Aldose reductase OS=Homo sapiens OX=9606 GN=AKR1B1 PE=1 SV=3	59	14	49
0.396014	0.132638	0.207904	0.146621	-0.367376	-0.435997	0.322196	-0.37732	-0.861802	0.31208	0.588013	0.422946	0.54022	0.2286	0.856226	-0.644352	-0.851276	-0.680881	0.304624	-0.0685171	0.350913	0.0364677	-0.00249577	0.169378	0.273503	0.0633223	-0.311679	0.296442	-0.225079	-0.36418	0.61322	-0.500911	0.2708	0.379866	-0.00285233	-0.537178	-0.759734	0.410676	0.465907	-0.369885	3.14844	0.000710489	0.136233	-0.452617	A0A0D9SFP6	Tyrosine-protein kinase receptor OS=Homo sapiens OX=9606 GN=NTRK3 PE=1 SV=1	>tr|A0A0D9SFP6|A0A0D9SFP6_HUMAN Tyrosine-protein kinase receptor OS=Homo sapiens OX=9606 GN=NTRK3 PE=1 SV=1	9	6	45
1.64326	0.52257	0.896962	0.943936	0.436339	-0.446263	0.435022	-0.163256	0.152625	0.392831	-0.179759	1.12625	0.536552	1.1287	0.486774	0.82367	-0.102967	0.262796	0.785563	0.04519	0.77374	-0.705545	0.594744	0.242923	0.191737	0.177499	-1.26134	0.573453	-0.405856	-0.158218	1.42188	1.68208	1.25915	0.303318	-0.144678	-0.480756	0.134247	-0.175294	0.741568	0.508305	2.47549	0.00334586	0.136514	-0.566105	Q9Y2I2	Netrin-G1 OS=Homo sapiens OX=9606 GN=NTNG1 PE=1 SV=3	>sp|Q9Y2I2|NTNG1_HUMAN Netrin-G1 OS=Homo sapiens OX=9606 GN=NTNG1 PE=1 SV=3	31	12	98
0.997181	0.544556	0.264037	0.214946	0.196391	-0.921297	0.30202	-1.10206	0.203152	-0.444736	0.360625	0.0553324	0.0675476	0.590189	0.194801	-0.2475	-0.448563	0.624132	0.389018	-0.237075	1.28607	-0.900243	1.06596	1.01564	0.520521	0.200047	-0.892803	0.851415	-0.670294	0.15831	0.862839	0.774999	0.531306	0.402499	-0.0161796	-0.205891	0.0176779	-0.00634385	0.786428	-0.030079	2.59891	0.00251819	0.137519	-0.535173	A0A0A0MQU6	Sema domain, transmembrane domain (TM), and cytoplasmic domain, (Semaphorin) 6A, isoform CRA_d OS=Homo sapiens OX=9606 GN=SEMA6A PE=1 SV=1	>tr|A0A0A0MQU6|A0A0A0MQU6_HUMAN Sema domain, transmembrane domain (TM), and cytoplasmic domain, (Semaphorin) 6A, isoform CRA_d OS=Homo sapiens OX=9606 GN=SEMA6A PE=1 SV=1	18	17	134
0.522635	-0.107366	0.509458	0.688137	-0.393616	-0.561259	0.161014	-0.481871	-0.124972	-0.457884	-0.0954913	0.508337	-0.066772	0.897668	-0.399988	-0.373678	-0.510899	-0.119066	0.654576	-0.0226413	0.748658	-0.85041	0.697734	0.942133	0.469506	0.177448	-0.855163	0.450816	-0.58242	0.100386	0.824926	0.680703	0.546994	0.667806	0.34049	-0.204352	0.015179	-0.285589	0.569476	-0.251128	2.82103	0.00150997	0.138542	-0.491678	P22304	Iduronate 2-sulfatase OS=Homo sapiens OX=9606 GN=IDS PE=1 SV=1	>sp|P22304|IDS_HUMAN Iduronate 2-sulfatase OS=Homo sapiens OX=9606 GN=IDS PE=1 SV=1	43	16	120
0.6267	-0.190365	0.618805	0.375716	0.039977	-0.371561	0.600498	-0.439205	-0.0324173	0.0395274	0.142151	1.01816	0.482259	0.711282	0.847426	-0.197532	-1.02785	-0.869174	0.454176	-0.881857	0.580797	-0.495866	0.133112	0.240269	0.360552	0.270803	-0.68145	0.280172	-0.318099	-0.365026	0.461193	-0.0656884	0.248547	-0.0715938	-0.193049	-0.810418	-0.83107	0.479091	0.389168	0.201443	2.80399	0.00157039	0.138615	-0.499058	Q9Y6N7	Roundabout homolog 1 OS=Homo sapiens OX=9606 GN=ROBO1 PE=1 SV=1	>sp|Q9Y6N7|ROBO1_HUMAN Roundabout homolog 1 OS=Homo sapiens OX=9606 GN=ROBO1 PE=1 SV=1	25	32	272
-0.119716	0.103673	-0.075472	-0.622575	-0.399564	0.34233	0.472088	0.17078	0.479754	-0.0830939	0.817632	-0.58214	0.371164	-0.56642	-0.249673	-0.0124652	-0.0436386	-0.0177364	0.32186	0.641331	-0.334515	-0.121987	-1.15446	-0.577356	-0.619644	-0.32855	0.59676	1.12173	0.975437	1.14973	0.608615	-1.02008	0.166551	0.620381	-0.659026	-0.311119	-0.666794	1.24905	0.212445	0.0741613	2.54167	0.00287297	0.138796	0.537934	P61981	14-3-3 protein gamma OS=Homo sapiens OX=9606 GN=YWHAG PE=1 SV=2	>sp|P61981|1433G_HUMAN 14-3-3 protein gamma OS=Homo sapiens OX=9606 GN=YWHAG PE=1 SV=2	43	9	78
0.608168	0.249237	0.429526	0.171992	-0.369233	-0.357161	0.21712	-0.642549	-0.0523418	0.658561	0.142125	0.022767	1.10073	-0.16022	0.546555	-0.66223	-1.25872	-1.03616	0.25984	-0.896467	1.002	-0.58451	0.223618	-0.248654	0.252346	0.0555567	-1.39763	0.326823	-1.00991	-0.427694	0.429911	0.184234	0.340012	0.447213	-0.0451966	-0.54855	-0.703824	0.645982	0.825926	-0.320476	2.52948	0.00295474	0.139132	-0.553326	P43146	Netrin receptor DCC OS=Homo sapiens OX=9606 GN=DCC PE=1 SV=2	>sp|P43146|DCC_HUMAN Netrin receptor DCC OS=Homo sapiens OX=9606 GN=DCC PE=1 SV=2	30	33	236
0.469408	0.32893	1.37687	0.591297	0.086025	0.0147537	1.06231	0.512709	-0.672092	0.511767	0.59607	0.818899	1.29793	0.290556	1.08122	-0.385015	-1.32545	-0.445638	0.65014	-0.673009	0.834873	0.144583	0.076087	-0.386291	0.486766	0.301654	-0.606821	0.467069	-0.338187	-0.598321	0.927138	-0.411522	1.0214	0.760191	-0.162973	-0.984875	-0.632244	1.26042	0.279961	0.0860154	2.35845	0.0043808	0.139193	-0.587116	P54764	Ephrin type-A receptor 4 OS=Homo sapiens OX=9606 GN=EPHA4 PE=1 SV=1	>sp|P54764|EPHA4_HUMAN Ephrin type-A receptor 4 OS=Homo sapiens OX=9606 GN=EPHA4 PE=1 SV=1	28	18	383
1.04857	0.250733	0.788914	0.307504	-0.428625	-0.468495	1.01933	-0.480019	-0.489863	0.183646	0.205941	0.844108	0.906104	0.738025	0.754378	-0.443315	-1.31685	-0.651153	0.783993	-0.823815	0.600556	-0.425953	0.318898	0.506251	0.287993	0.364837	-0.699307	0.618565	-0.0999592	-0.248205	0.921339	-0.106416	0.707015	0.356347	-0.11499	-0.879716	-0.574595	0.835427	0.635488	-0.0119255	2.5087	0.00309958	0.139352	-0.560631	A0A0U1RQC5	Neurexin-3-beta OS=Homo sapiens OX=9606 GN=NRXN3 PE=1 SV=1	>tr|A0A0U1RQC5|A0A0U1RQC5_HUMAN Neurexin-3-beta OS=Homo sapiens OX=9606 GN=NRXN3 PE=1 SV=1	38	52	785
0.941623	0.655834	0.258553	0.597197	-0.487299	-0.993444	0.587262	-1.33244	-0.243185	-0.454974	-0.242037	1.37016	-0.134774	1.26748	-0.117405	-0.60739	-0.811865	0.0269471	0.341431	-0.345858	1.5266	-0.860012	0.808577	1.05496	0.39186	0.904463	-1.08461	0.804025	-0.775852	0.17394	1.31943	0.944631	0.36438	0.422928	0.0340063	-0.621824	-0.219605	-0.0891872	1.88232	-0.119596	2.17107	0.00674412	0.139621	-0.654807	E9PDN6	Contactin-associated protein-like 4 OS=Homo sapiens OX=9606 GN=CNTNAP4 PE=1 SV=1	>tr|E9PDN6|E9PDN6_HUMAN Contactin-associated protein-like 4 OS=Homo sapiens OX=9606 GN=CNTNAP4 PE=1 SV=1	40	38	358
1.56621	-0.286171	0.374539	0.646397	-0.427531	-2.09378	0.720286	-0.421081	-0.375309	-1.38924	0.620076	0.703365	0.579845	0.800536	0.145418	-0.0763609	-0.454136	-0.052215	0.436633	-0.935732	0.873515	-0.52523	0.995965	1.451	-0.475503	0.311077	-1.03896	0.796119	-0.268849	0.720433	0.374987	1.01853	0.0690803	-0.0765687	-0.124835	-0.303938	-0.133014	-0.072383	0.555423	-0.207079	2.23167	0.00586582	0.140452	-0.629287	O75493	Carbonic anhydrase-related protein 11 OS=Homo sapiens OX=9606 GN=CA11 PE=1 SV=2	>sp|O75493|CAH11_HUMAN Carbonic anhydrase-related protein 11 OS=Homo sapiens OX=9606 GN=CA11 PE=1 SV=2	9	4	34
0.303983	0.303067	-0.385273	-0.243739	-0.597769	0.511278	-0.493719	0.996473	0.193517	-0.234603	-0.728252	-0.516055	-0.272151	-0.388537	0.00519046	-0.401435	-0.586879	-0.291096	0.278378	0.527172	-0.181224	-0.755223	-0.643225	-0.382704	-0.699022	0.153254	1.06226	0.350317	0.6655	0.14798	0.056016	-0.90144	0.127874	-0.168536	-0.368397	0.204642	-0.0405488	0.108259	-0.610785	0.299116	2.89711	0.00126733	0.140821	0.463725	P13489	Ribonuclease inhibitor OS=Homo sapiens OX=9606 GN=RNH1 PE=1 SV=2	>sp|P13489|RINI_HUMAN Ribonuclease inhibitor OS=Homo sapiens OX=9606 GN=RNH1 PE=1 SV=2	47	16	61
-0.953051	-0.649371	-1.74471	-1.18739	-2.76029	-0.605573	-2.02055	4.0817	-2.09211	-1.6587	-1.1714	0.653916	-1.976	-0.97394	-3.19997	2.80992	-1.58306	-0.502687	-1.80047	-0.232082	-2.60925	-1.87527	-2.71998	-3.38636	-1.96886	-2.3484	0.292363	-1.03214	7.12837	-0.166472	0.696476	-0.956737	-0.49642	-0.244252	-0.7128	1.35111	-1.82713	0.110751	-2.73045	3.52028	1.56731	0.0270823	0.141559	1.44652	Q5JXI8	Four and a half LIM domains protein 1 (Fragment) OS=Homo sapiens OX=9606 GN=FHL1 PE=1 SV=1	>tr|Q5JXI8|Q5JXI8_HUMAN Four and a half LIM domains protein 1 (Fragment) OS=Homo sapiens OX=9606 GN=FHL1 PE=1 SV=1	33	6	23
NaN	NaN	NaN	NaN	NaN	NaN	NaN	NaN	NaN	NaN	-0.381862	-0.663173	-1.08338	-0.206878	0.31915	0.163049	0.768445	1.07207	-0.103015	0.567063	-0.576892	-0.54265	-0.338512	-0.505713	-1.72324	-0.439151	-0.0213103	-0.786744	0.147394	-0.0468258	NaN	NaN	NaN	NaN	NaN	NaN	NaN	NaN	NaN	NaN	1.99511	0.0101132	0.14322	0.702413	O75340	Programmed cell death protein 6 OS=Homo sapiens OX=9606 GN=PDCD6 PE=1 SV=1	>sp|O75340|PDCD6_HUMAN Programmed cell death protein 6 OS=Homo sapiens OX=9606 GN=PDCD6 PE=1 SV=1	21	2	4
1.14101	-0.144606	0.860332	0.819578	0.41104	-0.957512	0.334058	-0.734872	0.293022	-0.695016	-0.108141	2.84642	-0.877838	2.13893	0.233258	0.173485	-0.454281	0.0771034	-0.194932	-0.617379	1.21794	-0.560706	1.15492	1.05687	0.517061	0.157646	-0.733989	0.350409	0.107375	0.409755	0.212516	0.508992	0.00707081	-0.639809	-0.00969284	-0.281433	0.41149	-0.635204	0.855956	-0.250316	2.12441	0.00750911	0.143966	-0.658489	P78509	Reelin OS=Homo sapiens OX=9606 GN=RELN PE=1 SV=3	>sp|P78509|RELN_HUMAN Reelin OS=Homo sapiens OX=9606 GN=RELN PE=1 SV=3	34	83	980
0.517049	0.33733	0.688638	0.444822	-0.226213	-0.0261945	0.848852	-0.35056	-0.219129	0.0462112	0.097025	1.00282	0.73316	0.760212	0.911695	-0.475214	-1.33486	-0.5142	0.485106	-1.14752	1.13441	-0.0426267	0.646583	0.346449	0.934918	0.603816	-0.181363	0.782643	0.0994512	-0.0924685	0.541532	-0.391716	0.182741	0.0605432	-0.172751	-0.860017	-0.510608	0.654698	0.211936	-0.0179429	2.47708	0.00333368	0.144096	-0.525199	Q9NZ53	Podocalyxin-like protein 2 OS=Homo sapiens OX=9606 GN=PODXL2 PE=1 SV=1	>sp|Q9NZ53|PDXL2_HUMAN Podocalyxin-like protein 2 OS=Homo sapiens OX=9606 GN=PODXL2 PE=1 SV=1	21	8	97
0.394504	0.27062	0.644762	0.261622	-0.364166	-0.114308	0.936209	0.0679589	-0.261653	-0.312869	-0.228199	0.548324	0.450104	0.686806	0.604756	-0.59045	-0.961933	-0.389325	0.143	-0.413993	0.306896	0.362252	-0.373453	-0.0632105	0.462788	0.100828	-0.374275	-0.0248145	0.259437	-0.280161	0.932575	0.291705	0.160694	0.330184	-0.172641	-0.873609	-0.934177	0.304474	-0.16365	0.275193	2.87439	0.0013354	0.144393	-0.455752	P99999	Cytochrome c OS=Homo sapiens OX=9606 GN=CYCS PE=1 SV=2	>sp|P99999|CYC_HUMAN Cytochrome c OS=Homo sapiens OX=9606 GN=CYCS PE=1 SV=2	63	9	115
0.477337	0.561598	0.633177	0.265602	-0.426963	-0.640972	0.596226	-1.13377	-0.253857	-0.515575	0.259317	1.06471	-0.404639	1.23223	0.506403	-0.177045	-0.520859	-0.40139	0.0993192	-0.953192	0.672358	-0.53357	0.59122	0.972439	0.505473	0.400098	-0.279346	0.860912	0.313323	0.288971	0.722655	0.139913	0.324217	0.0200208	0.206438	-0.018112	-0.203459	0.097455	0.574163	-0.49461	2.55883	0.00276166	0.144581	-0.507583	Q8IUC8	Polypeptide N-acetylgalactosaminyltransferase 13 OS=Homo sapiens OX=9606 GN=GALNT13 PE=2 SV=2	>sp|Q8IUC8|GLT13_HUMAN Polypeptide N-acetylgalactosaminyltransferase 13 OS=Homo sapiens OX=9606 GN=GALNT13 PE=2 SV=2	40	19	126
1.15051	0.359538	0.616655	0.295907	-0.510478	-0.16147	0.451017	-0.217747	0.126332	0.644091	-0.0992186	0.9016	0.977837	1.18513	0.536893	-0.309491	-1.81172	-0.525965	0.637888	-0.411789	0.793947	-0.185098	0.496044	0.455029	0.489575	0.393082	-1.12429	0.632547	-0.28205	-0.254283	1.05608	-0.033663	0.644874	0.404758	-0.360894	-0.909545	-0.713088	0.71628	0.45653	0.459742	2.33788	0.00459326	0.144793	-0.568948	J3KNF6	RGM domain family member B OS=Homo sapiens OX=9606 GN=RGMB PE=1 SV=1	>tr|J3KNF6|J3KNF6_HUMAN RGM domain family member B OS=Homo sapiens OX=9606 GN=RGMB PE=1 SV=1	35	9	70
-0.342888	0.119826	-0.701875	-0.707998	-0.944455	0.791974	-0.29583	-0.00311775	-0.216867	1.20263	0.0726919	0.173835	0.0804715	-0.126413	-0.0252218	0.430538	0.357637	0.271214	-0.259331	0.424619	-0.237974	-0.185179	-0.307208	-0.725965	-0.238741	-0.581185	0.660556	-0.149642	1.40325	-0.153596	-0.922721	-0.482548	-0.574725	0.249517	1.09493	2.1348	1.26141	-0.172787	0.628226	-0.816713	2.25924	0.00550501	0.145197	0.582522	P21399	Cytoplasmic aconitate hydratase OS=Homo sapiens OX=9606 GN=ACO1 PE=1 SV=3	>sp|P21399|ACOC_HUMAN Cytoplasmic aconitate hydratase OS=Homo sapiens OX=9606 GN=ACO1 PE=1 SV=3	14	8	16
0.85539	0.470143	1.2107	0.21335	-0.61823	0.255642	0.843055	0.126731	-0.51037	0.42654	0.667371	0.183191	0.522385	0.259857	1.09209	0.376786	-0.765268	-0.682476	0.864633	-1.52777	0.549822	0.523026	-0.00266033	0.1333	0.524084	0.581206	-0.535602	0.704241	-0.910269	-0.97673	1.17964	-1.15802	1.39888	0.971507	-0.044577	-1.06713	-0.635983	0.0776475	-1.23111	0.808327	2.16188	0.00688838	0.145233	-0.635457	Q99674	Cell growth regulator with EF hand domain protein 1 OS=Homo sapiens OX=9606 GN=CGREF1 PE=2 SV=2	>sp|Q99674|CGRE1_HUMAN Cell growth regulator with EF hand domain protein 1 OS=Homo sapiens OX=9606 GN=CGREF1 PE=2 SV=2	66	16	148
0.867155	0.605415	0.308656	0.476611	-0.392763	-0.255127	0.708866	-0.225694	-0.428385	0.554564	1.32837	-0.0297892	0.966472	0.474755	0.669781	-0.615939	-0.957622	-0.682612	0.770681	-0.489875	0.770965	0.0716616	-0.0217072	-0.403151	-0.0275258	-0.0948719	-1.05334	0.285645	-0.340489	-0.785175	0.559686	-0.190242	0.467664	0.437645	0.0713694	-0.835016	-0.641703	1.01124	0.412012	0.0138886	2.42666	0.00374399	0.146222	-0.532999	E9PNQ8	Thy-1 membrane glycoprotein (Fragment) OS=Homo sapiens OX=9606 GN=THY1 PE=1 SV=1	>tr|E9PNQ8|E9PNQ8_HUMAN Thy-1 membrane glycoprotein (Fragment) OS=Homo sapiens OX=9606 GN=THY1 PE=1 SV=1	24	4	166
-0.762294	-0.757611	-1.91301	-1.51358	-1.00248	-0.439602	-1.96606	-0.97429	-0.189456	0.0815234	-0.492639	-1.89486	-1.32548	-1.01291	-0.324917	-0.255632	0.621723	0.119161	1.75516	0.601117	-1.69971	-0.494707	-1.28648	-1.12271	-1.33123	-1.78031	0.839563	-1.52174	0.556601	5.16158	-1.10134	-0.190532	-0.461108	-0.360419	2.07858	1.49298	0.738208	-0.928786	-0.031358	-1.30916	1.70337	0.0197986	0.148031	0.977034	O75636	Ficolin-3 OS=Homo sapiens OX=9606 GN=FCN3 PE=1 SV=2	>sp|O75636|FCN3_HUMAN Ficolin-3 OS=Homo sapiens OX=9606 GN=FCN3 PE=1 SV=2	30	6	34
0.672686	0.33523	0.618021	0.118337	-0.162732	-0.117746	0.645602	-0.343776	-0.947713	-0.14917	0.103967	0.832347	0.147075	0.882512	0.784836	-0.529351	-0.811501	-0.567174	0.16782	-0.886475	0.381399	-0.430242	0.340433	0.519042	0.293595	0.606155	-0.0691549	0.757688	-0.109766	-0.224617	0.689454	-0.365947	0.573458	0.540191	0.193907	-0.67126	-0.434093	0.336856	0.592148	0.28022	2.63622	0.00231087	0.148697	-0.477144	Q53EL9	Seizure protein 6 homolog OS=Homo sapiens OX=9606 GN=SEZ6 PE=1 SV=2	>sp|Q53EL9|SEZ6_HUMAN Seizure protein 6 homolog OS=Homo sapiens OX=9606 GN=SEZ6 PE=1 SV=2	25	17	207
0.794984	0.163674	0.701742	0.253989	0.284655	0.615422	0.341551	-0.273367	-0.31163	0.238566	0.659566	0.426821	1.63823	0.407962	1.07859	-0.633443	-0.833123	-0.200176	0.648028	-0.525802	0.243745	-0.246531	0.0497302	0.376156	-0.11988	0.168895	-0.222575	0.388974	-0.615674	-0.497682	0.509816	-0.221529	0.232461	0.688288	-0.275996	-0.764144	-0.707283	0.581218	0.53434	-0.186603	2.55669	0.00277532	0.149364	-0.495049	Q9UMF0	Intercellular adhesion molecule 5 OS=Homo sapiens OX=9606 GN=ICAM5 PE=1 SV=3	>sp|Q9UMF0|ICAM5_HUMAN Intercellular adhesion molecule 5 OS=Homo sapiens OX=9606 GN=ICAM5 PE=1 SV=3	28	21	246
0.329969	0.0628903	0.864933	0.51147	0.171999	-0.0890641	1.04174	-0.0923563	-0.0633165	-0.346654	0.0946278	0.775516	0.579631	0.870796	0.782746	-0.0708621	-0.431633	-0.0540234	0.36705	0.487352	0.714852	0.0755609	0.324864	0.264041	0.671476	0.286963	-0.212742	0.136841	-0.244021	-0.112037	0.813762	-0.436916	0.808928	0.137143	0.00204894	-0.762711	-0.396564	0.465437	-0.069319	0.00644047	2.97185	0.00106697	0.149374	-0.428691	O94760	N(G),N(G)-dimethylarginine dimethylaminohydrolase 1 OS=Homo sapiens OX=9606 GN=DDAH1 PE=1 SV=3	>sp|O94760|DDAH1_HUMAN N(G),N(G)-dimethylarginine dimethylaminohydrolase 1 OS=Homo sapiens OX=9606 GN=DDAH1 PE=1 SV=3	64	15	125
-0.622208	-0.269781	-0.254071	-0.426505	-0.689468	0.701635	0.451046	0.471529	0.826856	0.0537449	0.857002	-1.30802	0.685489	-0.688999	-0.624437	0.4517	0.438684	-0.212012	0.363951	0.259246	-0.465614	0.69801	-1.072	-0.847395	0.819454	0.190482	0.794209	0.574009	1.6682	0.0990859	1.11148	-1.32349	-0.0346291	0.309636	-0.659452	-0.0216911	-1.2043	1.56315	-0.381778	0.438617	2.13387	0.00734727	0.149908	0.616568	P05413	Fatty acid-binding protein, heart OS=Homo sapiens OX=9606 GN=FABP3 PE=1 SV=4	>sp|P05413|FABPH_HUMAN Fatty acid-binding protein, heart OS=Homo sapiens OX=9606 GN=FABP3 PE=1 SV=4	63	10	49
NaN	NaN	NaN	NaN	NaN	NaN	NaN	NaN	NaN	NaN	NaN	NaN	NaN	NaN	NaN	NaN	NaN	NaN	NaN	NaN	0.585509	0.498937	0.0113103	-0.858372	-0.240428	-1.22181	-2.39988	-0.980348	0.0879686	-2.1108	NaN	NaN	NaN	NaN	NaN	NaN	NaN	NaN	NaN	NaN	1.48404	0.0328065	0.1585	-1.32437	Q96JJ7	Protein disulfide-isomerase TMX3 OS=Homo sapiens OX=9606 GN=TMX3 PE=1 SV=2	>sp|Q96JJ7|TMX3_HUMAN Protein disulfide-isomerase TMX3 OS=Homo sapiens OX=9606 GN=TMX3 PE=1 SV=2	3	1	2
1.0586	0.413092	0.854675	0.385014	-0.40972	-0.346402	0.981583	-0.428102	-0.374542	0.214597	0.187716	1.03373	0.453198	0.932518	0.617995	-0.249581	-0.95606	-0.153757	0.465135	-0.68049	0.585191	-0.401411	0.555893	0.904298	0.549733	0.610673	-0.558021	0.764772	-0.106696	-0.0749198	0.654479	0.176044	0.688272	-0.0175983	-0.0658823	-0.636604	-0.349575	0.528458	0.55295	0.199694	2.49312	0.0032128	0.158745	-0.487636	Q9P2S2	Neurexin-2 OS=Homo sapiens OX=9606 GN=NRXN2 PE=2 SV=1	>sp|Q9P2S2|NRX2A_HUMAN Neurexin-2 OS=Homo sapiens OX=9606 GN=NRXN2 PE=2 SV=1	40	57	637
1.02619	0.00502232	1.06958	0.618907	-0.026954	-0.459015	0.637689	0.121952	-1.16814	0.289366	0.255519	0.0779053	0.695788	-0.412354	-0.231827	0.178251	-1.35949	-0.563009	0.474355	-0.386186	1.07953	0.357242	0.705297	0.124372	0.61576	0.522784	-0.874069	1.0724	0.0937605	-0.56542	0.660635	-0.413898	0.935049	0.757679	-0.0258936	-1.24875	-0.864047	0.852379	0.270845	-0.437037	2.20972	0.00616988	0.15923	-0.564247	Q9BYH1	Seizure 6-like protein OS=Homo sapiens OX=9606 GN=SEZ6L PE=1 SV=1	>sp|Q9BYH1|SE6L1_HUMAN Seizure 6-like protein OS=Homo sapiens OX=9606 GN=SEZ6L PE=1 SV=1	24	14	144
0.389858	0.521229	0.0289819	0.103824	-0.142236	-0.349697	0.34978	-0.951222	0.332974	0.0999051	-0.0866163	1.15568	0.529712	1.01422	0.260887	-0.279382	-0.981973	-0.0890098	0.033227	-0.471721	0.905122	-0.0822016	0.0141085	0.678414	0.40469	0.00352841	-0.752107	0.0233118	0.14441	-0.225711	0.00434671	-0.730918	0.270295	0.00268713	-0.405608	-0.834477	-1.00656	0.0487345	0.448004	-0.210187	2.58053	0.00262705	0.159338	-0.475232	Q14114	Low-density lipoprotein receptor-related protein 8 OS=Homo sapiens OX=9606 GN=LRP8 PE=1 SV=4	>sp|Q14114|LRP8_HUMAN Low-density lipoprotein receptor-related protein 8 OS=Homo sapiens OX=9606 GN=LRP8 PE=1 SV=4	36	24	88
-0.156909	1.2213	0.465057	0.732683	-0.952106	-0.541245	-0.0618083	-0.645419	-0.496369	0.56953	0.795786	-0.194005	0.798106	0.672809	0.210468	-0.736795	-1.08033	-0.450988	0.384732	-1.09764	-0.257095	0.261333	-0.0469057	0.282299	0.698323	0.313308	-0.539145	0.171004	0.0962659	-0.72305	0.194615	-0.234621	0.0403111	-0.0329939	-0.603719	-0.803277	-0.631096	0.349347	0.216677	-0.600381	2.40773	0.00391087	0.159343	-0.51007	F6SYF8	Dickkopf-related protein 3 OS=Homo sapiens OX=9606 GN=DKK3 PE=1 SV=1	>tr|F6SYF8|F6SYF8_HUMAN Dickkopf-related protein 3 OS=Homo sapiens OX=9606 GN=DKK3 PE=1 SV=1	54	15	911
0.967559	0.183997	0.998526	0.338137	-0.452216	-0.154318	0.834125	0.288838	-0.587466	0.218585	0.790643	0.692221	1.37863	0.384583	0.612948	-0.49171	-1.5939	-0.625278	0.648853	-0.789661	0.893297	-0.185848	0.216438	0.0922833	0.249969	0.41009	-0.897899	0.778622	-0.824762	-0.804315	0.697618	-0.762092	0.609941	0.403388	-1.00104	-1.07542	-0.789837	1.16843	-0.21028	-0.307762	2.08906	0.00814587	0.159465	-0.595702	Q92823	Neuronal cell adhesion molecule OS=Homo sapiens OX=9606 GN=NRCAM PE=1 SV=3	>sp|Q92823|NRCAM_HUMAN Neuronal cell adhesion molecule OS=Homo sapiens OX=9606 GN=NRCAM PE=1 SV=3	43	46	1469
0.688759	0.573622	-0.161323	-0.0189152	0.774031	-1.05593	0.412334	-1.4749	0.63078	-0.801239	-0.269361	0.0160773	0.16425	0.192548	-0.170685	-0.699387	-0.433211	-0.0333348	0.480992	-0.24775	0.598754	-0.783774	0.823127	0.889894	0.378942	0.256562	-1.44073	0.376415	-0.783775	0.293132	1.39471	1.347	0.692059	-0.153574	-0.011443	-0.853843	0.119744	-0.472184	0.991331	0.218805	2.14995	0.0070802	0.159688	-0.574044	Q9Y6X5	Bis(5'-adenosyl)-triphosphatase ENPP4 OS=Homo sapiens OX=9606 GN=ENPP4 PE=1 SV=3	>sp|Q9Y6X5|ENPP4_HUMAN Bis(5'-adenosyl)-triphosphatase ENPP4 OS=Homo sapiens OX=9606 GN=ENPP4 PE=1 SV=3	11	6	28
0.774713	0.464347	0.807979	0.274415	-0.718205	-0.230797	0.704448	-0.146572	-1.12591	0.127494	0.388111	0.232	0.731997	0.664955	0.43096	-0.201997	-1.27288	-0.395645	0.565029	-0.36902	0.293769	0.162075	0.177107	-0.0316859	0.347168	0.107948	-0.479143	0.286614	-0.504386	-0.73136	0.356545	-0.387812	0.53745	0.105007	-0.131804	-0.846802	-0.432219	0.976262	0.0909981	-0.298198	2.4604	0.00346415	0.16011	-0.482761	Q9NQ79	Cartilage acidic protein 1 OS=Homo sapiens OX=9606 GN=CRTAC1 PE=1 SV=2	>sp|Q9NQ79|CRAC1_HUMAN Cartilage acidic protein 1 OS=Homo sapiens OX=9606 GN=CRTAC1 PE=1 SV=2	57	28	474
0.505583	0.258751	0.565021	0.275392	0.476792	-0.56771	0.254608	-0.113192	-0.363544	-0.0763699	0.562309	0.642868	0.343313	0.807813	0.192405	-0.0960876	-0.139531	-0.433772	0.105738	-0.721388	0.524222	-0.273272	0.608425	0.52005	-0.0110737	0.0472576	-0.161645	0.315696	-0.0801959	-0.323067	-0.0754932	-0.147949	-0.0916108	-0.155665	-0.280234	-0.346617	0.199554	0.244515	-0.206444	0.140508	3.29201	0.000510496	0.160222	-0.378467	Q92752	Tenascin-R OS=Homo sapiens OX=9606 GN=TNR PE=1 SV=3	>sp|Q92752|TENR_HUMAN Tenascin-R OS=Homo sapiens OX=9606 GN=TNR PE=1 SV=3	34	33	235
-1.3554	-0.798425	0.903288	1.27393	3.61151	0.241632	-0.0486786	2.00324	0.81662	0.745954	2.28312	-0.111308	1.28958	0.528264	1.81861	-0.94425	0.641191	-1.73173	-1.52432	1.8741	0.85948	0.484776	2.29517	0.1481	-0.10085	-1.50423	1.69179	-0.322165	0.434729	-1.90897	-0.386373	-0.173431	0.997184	-0.369231	0.644597	-0.816213	-0.132825	-1.82582	-0.415377	-2.42302	1.65729	0.0220145	0.160319	-0.949547	Q5T1S8	Noncompact myelin-associated protein OS=Homo sapiens OX=9606 GN=NCMAP PE=3 SV=1	>sp|Q5T1S8|NCMAP_HUMAN Noncompact myelin-associated protein OS=Homo sapiens OX=9606 GN=NCMAP PE=3 SV=1	7	1	10
0.828488	0.238778	1.0238	1.1994	0.94329	0.0495511	0.649214	0.498528	0.16537	-0.0225219	0.343076	0.604961	0.500096	0.568294	0.348791	-0.388049	-0.460438	-0.125939	0.792742	-0.252589	0.487109	-0.609204	0.456624	0.362963	0.6096	0.362009	-0.389863	0.293366	-0.310038	-0.126342	0.162498	0.0873183	0.123217	-0.00823877	-0.207831	-0.607272	-0.393928	-0.182535	-0.0292672	-0.158828	2.77847	0.00166546	0.160571	-0.434993	O75976	Carboxypeptidase D OS=Homo sapiens OX=9606 GN=CPD PE=1 SV=2	>sp|O75976|CBPD_HUMAN Carboxypeptidase D OS=Homo sapiens OX=9606 GN=CPD PE=1 SV=2	17	19	81
0.365474	0.365615	0.285132	-0.0559322	-0.0653829	0.38624	0.119024	0.192286	-0.165992	0.0749133	0.296903	-0.279929	0.244854	-0.208123	0.391304	1.17046	0.85664	0.7175	0.731729	0.974686	0.0552961	0.0610297	0.171625	-0.0147273	0.387292	0.554453	0.582755	0.462093	0.532648	-0.0502447	0.0610183	-0.139902	-0.145092	-0.347951	-0.518646	0.0407211	1.32099	0.578963	-0.174477	0.136181	3.02473	0.000944643	0.160892	0.406586	P63167	Dynein light chain 1, cytoplasmic OS=Homo sapiens OX=9606 GN=DYNLL1 PE=1 SV=1	>sp|P63167|DYL1_HUMAN Dynein light chain 1, cytoplasmic OS=Homo sapiens OX=9606 GN=DYNLL1 PE=1 SV=1	46	4	24
0.463631	0.500164	0.276932	0.175009	-0.138314	0.121911	0.28935	-0.359157	-0.518739	-0.353895	0.267674	0.693715	-0.0608759	0.430503	0.0769075	-0.584875	-0.710254	-0.403781	-0.0402583	-0.671286	0.455726	0.217806	0.292139	0.963296	0.193271	0.26925	-0.518723	0.586709	-0.0768442	0.377158	0.445895	0.164171	0.264637	0.217953	0.0426499	-0.0996774	-0.117875	0.406518	0.448167	0.0489174	3.12678	0.000746833	0.161259	-0.392514	A0A0A0MTH0	Neuroligin-4, X-linked OS=Homo sapiens OX=9606 GN=NLGN4X PE=1 SV=1	>tr|A0A0A0MTH0|A0A0A0MTH0_HUMAN Neuroligin-4, X-linked OS=Homo sapiens OX=9606 GN=NLGN4X PE=1 SV=1	20	12	72
1.36913	-0.27013	1.84729	1.17994	-0.068031	0.09127	0.961037	0.786189	-0.492024	0.211651	0.459021	0.927318	1.47358	0.55504	0.877079	-0.279459	-1.28408	-0.631707	0.823762	-0.624105	0.609343	0.109423	0.277419	-0.230695	0.53706	0.490812	-0.96211	0.430796	-0.461448	-1.14793	1.08974	0.0559412	0.617436	-0.870085	-0.924218	-1.27535	-0.691551	0.853519	0.0425029	0.186686	1.97969	0.0104789	0.162286	-0.629658	Q6ZVL6	UPF0606 protein KIAA1549L OS=Homo sapiens OX=9606 GN=KIAA1549L PE=2 SV=2	>sp|Q6ZVL6|K154L_HUMAN UPF0606 protein KIAA1549L OS=Homo sapiens OX=9606 GN=KIAA1549L PE=2 SV=2	11	17	90
1.30501	0.542763	0.860668	0.48334	-0.266139	-0.658041	0.736813	-0.924699	-0.134688	-0.462017	0.126692	1.26449	0.0249054	1.41378	0.370765	0.31163	-1.02862	0.026669	0.933368	-0.977059	1.55009	-0.647645	1.44577	1.3186	0.637607	0.989532	-0.561188	1.09513	0.341291	0.331516	1.08291	0.669887	1.02949	-0.133104	-0.211654	-0.565997	-0.166722	0.507294	0.940142	0.269846	2.04987	0.00891527	0.162309	-0.593201	H7C215	Reticulon-4 receptor (Fragment) OS=Homo sapiens OX=9606 GN=RTN4R PE=1 SV=1	>tr|H7C215|H7C215_HUMAN Reticulon-4 receptor (Fragment) OS=Homo sapiens OX=9606 GN=RTN4R PE=1 SV=1	39	16	139
0.461546	0.338362	0.213345	0.0664977	-0.310169	0.0473018	0.408922	-0.545009	-0.229224	-0.123384	0.390154	0.728951	0.0380151	0.506219	0.166058	-0.602027	-1.09671	-0.555352	0.215424	-0.428665	0.672165	0.0979927	0.252848	0.69787	0.426432	0.272335	-0.361886	0.687285	-0.323647	0.420678	0.402643	0.101918	0.408827	0.762373	-0.190194	-0.289672	-0.413322	0.645243	0.20792	-0.11869	2.82517	0.00149564	0.162603	-0.420716	Q8N2Q7	Neuroligin-1 OS=Homo sapiens OX=9606 GN=NLGN1 PE=1 SV=2	>sp|Q8N2Q7|NLGN1_HUMAN Neuroligin-1 OS=Homo sapiens OX=9606 GN=NLGN1 PE=1 SV=2	18	10	98
1.13603	0.0218312	1.01016	0.197342	0.122116	0.151065	0.521324	0.258676	-0.383978	-0.277818	0.0578224	-0.303521	0.754487	-0.666005	0.306755	-1.44301	-1.52448	-0.9782	0.599166	-1.04541	0.587206	0.172967	-0.40827	-0.122942	-0.651821	-0.146232	-1.09712	0.324376	-1.29671	-0.648038	1.13586	-0.612256	0.216244	0.58648	-0.545914	-1.10922	-1.02134	0.75078	-0.0242218	-0.220102	2.08359	0.00824913	0.163027	-0.580253	Q9Y2T3	Guanine deaminase OS=Homo sapiens OX=9606 GN=GDA PE=1 SV=1	>sp|Q9Y2T3|GUAD_HUMAN Guanine deaminase OS=Homo sapiens OX=9606 GN=GDA PE=1 SV=1	47	19	110
0.8398	-0.266479	1.32406	0.418463	-0.112774	-0.370906	0.0391027	0.241207	-0.564708	0.310359	0.0179907	1.08987	1.1886	0.550805	0.378253	0.471184	-0.950883	0.787855	0.82602	0.0518742	1.67276	-0.416897	0.860927	1.26538	-0.253794	0.506442	-0.446389	0.667849	-0.807322	-0.164926	1.07768	0.548754	1.74533	0.0197962	-0.110496	-1.05886	-0.425015	0.430893	0.565965	0.453555	2.11004	0.00776178	0.164747	-0.563737	Q99574	Neuroserpin OS=Homo sapiens OX=9606 GN=SERPINI1 PE=1 SV=1	>sp|Q99574|NEUS_HUMAN Neuroserpin OS=Homo sapiens OX=9606 GN=SERPINI1 PE=1 SV=1	65	21	344
1.04457	0.18371	0.872805	1.06978	0.279418	-0.553619	0.754496	-0.409133	-1.2988	-0.919338	-0.352414	2.43752	-1.38382	1.72121	0.446046	0.382985	-0.777382	-0.8891	0.00967184	-1.14478	1.4497	-0.625904	0.860812	0.612603	0.569448	0.480053	0.274015	0.206928	0.102326	-0.0863434	0.386711	-0.35919	-0.0952686	-0.382031	0.515366	-0.00292264	0.0329362	-0.415293	0.665353	0.185638	1.94562	0.0113339	0.16498	-0.632669	Q9NYQ8	Protocadherin Fat 2 OS=Homo sapiens OX=9606 GN=FAT2 PE=1 SV=2	>sp|Q9NYQ8|FAT2_HUMAN Protocadherin Fat 2 OS=Homo sapiens OX=9606 GN=FAT2 PE=1 SV=2	37	119	1021
NaN	NaN	NaN	NaN	NaN	NaN	NaN	NaN	NaN	NaN	-0.238779	-0.293487	-0.0770672	0.485982	-0.399719	0.661628	0.936408	0.665938	0.165735	0.840813	-0.315236	-0.477344	-0.288602	-0.19687	-0.316019	0.117737	0.149456	-0.11312	1.672	-0.219867	-0.546643	0.0910756	-0.00339014	0.189277	-0.894405	0.857709	0.16961	-0.210776	-0.60158	-0.459048	2.16497	0.00683951	0.170118	0.527591	Q96DG6	Carboxymethylenebutenolidase homolog OS=Homo sapiens OX=9606 GN=CMBL PE=1 SV=1	>sp|Q96DG6|CMBL_HUMAN Carboxymethylenebutenolidase homolog OS=Homo sapiens OX=9606 GN=CMBL PE=1 SV=1	11	3	8
-0.314994	-0.573412	-0.8611	-1.03414	-2.08231	1.50276	-1.22801	0.622718	0.359682	0.450828	NaN	NaN	NaN	NaN	NaN	NaN	NaN	NaN	NaN	NaN	NaN	NaN	NaN	NaN	NaN	NaN	NaN	NaN	NaN	NaN	NaN	NaN	NaN	NaN	NaN	NaN	NaN	NaN	NaN	NaN	1.4011	0.0397102	0.17044	1.31479	P08133	Annexin A6 OS=Homo sapiens OX=9606 GN=ANXA6 PE=1 SV=3	>sp|P08133|ANXA6_HUMAN Annexin A6 OS=Homo sapiens OX=9606 GN=ANXA6 PE=1 SV=3	13	7	7
0.464161	0.592829	0.627142	-0.0733796	-0.952515	-0.36897	0.591409	-0.657531	-0.306993	0.146714	-0.506056	0.860859	-0.33698	0.742575	0.338754	-0.169688	-1.48431	-0.816954	-0.8067	-0.600638	0.928188	-0.0699548	0.332828	0.260928	0.859522	0.377189	-0.274982	0.642666	0.440513	0.360463	1.32977	-0.31182	1.05029	0.423822	-0.146641	-0.757175	-0.534485	0.628976	-0.0161592	-0.614009	2.15831	0.00694535	0.170831	-0.531749	P22748	Carbonic anhydrase 4 OS=Homo sapiens OX=9606 GN=CA4 PE=1 SV=2	>sp|P22748|CAH4_HUMAN Carbonic anhydrase 4 OS=Homo sapiens OX=9606 GN=CA4 PE=1 SV=2	38	12	70
0.570419	0.721676	0.405603	1.18374	0.251972	0.57381	0.310789	-0.246393	0.186466	-0.0224039	NaN	NaN	NaN	NaN	NaN	NaN	NaN	NaN	NaN	NaN	NaN	NaN	NaN	NaN	NaN	NaN	NaN	NaN	NaN	NaN	0.104351	0.5585	0.162291	1.43143	0.699257	0.252064	0.35046	-0.439661	-0.391254	0.25815	2.14414	0.0071757	0.170868	-0.525721	P08069	Insulin-like growth factor 1 receptor OS=Homo sapiens OX=9606 GN=IGF1R PE=1 SV=1	>sp|P08069|IGF1R_HUMAN Insulin-like growth factor 1 receptor OS=Homo sapiens OX=9606 GN=IGF1R PE=1 SV=1	1	1	3
NaN	NaN	NaN	NaN	NaN	NaN	NaN	NaN	NaN	NaN	0.0110349	-0.614569	-0.498519	-0.379718	-0.68986	0.183535	0.795188	0.23659	-0.409203	0.468356	NaN	NaN	NaN	NaN	NaN	NaN	NaN	NaN	NaN	NaN	NaN	NaN	NaN	NaN	NaN	NaN	NaN	NaN	NaN	NaN	1.73865	0.0182538	0.171089	0.68922	A0A2R8Y5S1	Serpin B6 (Fragment) OS=Homo sapiens OX=9606 GN=SERPINB6 PE=1 SV=1	>tr|A0A2R8Y5S1|A0A2R8Y5S1_HUMAN Serpin B6 (Fragment) OS=Homo sapiens OX=9606 GN=SERPINB6 PE=1 SV=1	23	1	4
-0.622131	-0.0788684	-0.377432	-1.32185	0.396369	1.51259	1.20073	0.146347	1.23023	0.202898	0.606719	-1.54631	1.11092	-1.02866	-0.21895	-0.0142047	0.90825	0.468578	0.513854	0.238538	0.173539	0.642926	0.112918	0.267235	0.437539	1.41312	0.536073	0.500123	0.63386	-1.05599	0.214547	-0.54624	0.0446133	0.11603	-1.35442	-0.868005	-0.168419	1.80805	-0.629263	0.992412	1.91249	0.0122324	0.171355	0.627064	P20333	Tumor necrosis factor receptor superfamily member 1B OS=Homo sapiens OX=9606 GN=TNFRSF1B PE=1 SV=3	>sp|P20333|TNR1B_HUMAN Tumor necrosis factor receptor superfamily member 1B OS=Homo sapiens OX=9606 GN=TNFRSF1B PE=1 SV=3	14	4	19
-0.0830564	0.39094	-1.12171	0.3304	-0.349923	-0.138782	-1.94499	-0.0276382	-0.188318	1.19381	-0.220038	0.974598	-0.644248	-0.72624	1.50788	1.30302	0.878308	1.22354	0.680397	1.55923	-2.06437	-0.322737	-0.499848	-2.29771	-0.531168	-1.49614	0.715766	0.952711	1.17676	3.30748	-2.38441	-0.267726	0.386004	-2.45702	1.54852	1.58766	0.778631	-1.4589	-0.286675	-0.696742	1.60111	0.0250547	0.171487	0.897549	O14791	Apolipoprotein L1 OS=Homo sapiens OX=9606 GN=APOL1 PE=1 SV=5	>sp|O14791|APOL1_HUMAN Apolipoprotein L1 OS=Homo sapiens OX=9606 GN=APOL1 PE=1 SV=5	33	14	106
0.382802	0.383548	0.5254	0.280386	-0.0768132	-0.299268	0.511666	-0.46217	-0.00216052	0.174806	0.745468	0.518975	0.494927	0.756926	0.726439	-0.308018	-1.07754	-0.135329	0.567055	-0.58396	0.689681	-0.335634	0.0774659	0.303157	0.222665	0.185451	-0.595434	0.349257	-0.184838	-0.125551	0.370271	-0.484413	0.200944	0.145614	0.0547714	-0.450317	-0.429984	0.346492	0.486486	-0.27478	2.72398	0.00188809	0.171618	-0.414536	O94910	Adhesion G protein-coupled receptor L1 OS=Homo sapiens OX=9606 GN=ADGRL1 PE=1 SV=1	>sp|O94910|AGRL1_HUMAN Adhesion G protein-coupled receptor L1 OS=Homo sapiens OX=9606 GN=ADGRL1 PE=1 SV=1	26	29	190
NaN	NaN	NaN	NaN	NaN	NaN	NaN	NaN	NaN	NaN	NaN	NaN	NaN	NaN	NaN	NaN	NaN	NaN	NaN	NaN	NaN	NaN	NaN	NaN	NaN	NaN	NaN	NaN	NaN	NaN	0.333718	0.420688	0.101934	-0.264315	-0.151085	2.02428	2.9273	0.361038	1.15866	0.331926	1.40625	0.0392418	0.171975	1.27245	P19971	Thymidine phosphorylase OS=Homo sapiens OX=9606 GN=TYMP PE=1 SV=2	>sp|P19971|TYPH_HUMAN Thymidine phosphorylase OS=Homo sapiens OX=9606 GN=TYMP PE=1 SV=2	3	1	2
-0.702567	0.311036	-1.90846	-0.243255	-0.0612459	0.682235	-0.158636	-0.594912	1.68129	1.37034	-0.304994	-2.57456	-0.665717	0.489166	1.19839	-0.465053	0.835871	1.1471	1.83487	1.99307	-1.80323	-0.535871	-0.645339	1.37856	-1.12076	-0.688275	0.551626	-0.658836	1.41731	0.218611	-0.288224	-0.983339	0.260937	-0.253899	0.549305	0.6419	1.03043	-2.01448	-0.160288	-0.931291	1.66644	0.0215558	0.173472	0.781848	P02763	Alpha-1-acid glycoprotein 1 OS=Homo sapiens OX=9606 GN=ORM1 PE=1 SV=1	>sp|P02763|A1AG1_HUMAN Alpha-1-acid glycoprotein 1 OS=Homo sapiens OX=9606 GN=ORM1 PE=1 SV=1	67	16	1481
0.482279	0.0443835	0.188803	-0.645775	0.0540206	-0.500506	-0.0829911	-0.654599	-0.605957	0.0555262	0.372931	0.590777	1.36428	0.24439	1.15443	-0.647088	-1.0978	-0.113059	0.914416	-0.639964	0.632513	-0.42441	0.124542	0.360584	-0.22308	0.522467	-1.54777	0.354299	-0.783924	-0.589174	0.620679	-0.501333	0.519398	0.683568	-0.0344563	-1.12904	-0.700687	0.716776	1.14797	0.0564134	2.05534	0.00880355	0.174296	-0.546661	A0A0A0MTQ4	Repulsive guidance molecule A OS=Homo sapiens OX=9606 GN=RGMA PE=1 SV=1	>tr|A0A0A0MTQ4|A0A0A0MTQ4_HUMAN Repulsive guidance molecule A OS=Homo sapiens OX=9606 GN=RGMA PE=1 SV=1	36	11	110
0.709593	-0.734412	-0.591908	-0.120937	0.952635	1.15849	1.13143	0.524565	0.625324	3.90387	-0.244136	1.28503	-1.84582	0.183104	-1.56864	-0.182178	0.569257	0.813323	-0.501992	-1.49199	-1.01219	-0.0189434	-0.922547	0.985033	-0.999058	-1.22074	0.0546171	0.735827	0.0887474	1.03837	-2.88756	-2.79762	0.393001	0.696404	-1.97833	1.67209	0.942482	0.118905	1.41315	-3.01444	1.54598	0.0284461	0.17513	0.944821	A0A0C4DH30	Immunoglobulin heavy variable 3-16 (non-functional) (Fragment) OS=Homo sapiens OX=9606 GN=IGHV3-16 PE=1 SV=1	>tr|A0A0C4DH30|A0A0C4DH30_HUMAN Immunoglobulin heavy variable 3-16 (non-functional) (Fragment) OS=Homo sapiens OX=9606 GN=IGHV3-16 PE=1 SV=1	36	2	8
-0.915952	-0.954753	-1.11796	-0.878559	-0.353878	0.0448385	-0.778718	-0.312441	0.696205	1.67464	NaN	NaN	NaN	NaN	NaN	NaN	NaN	NaN	NaN	NaN	NaN	NaN	NaN	NaN	NaN	NaN	NaN	NaN	NaN	NaN	NaN	NaN	NaN	NaN	NaN	NaN	NaN	NaN	NaN	NaN	1.42359	0.0377059	0.175976	1.10913	D6RF20	Vitamin D-binding protein (Fragment) OS=Homo sapiens OX=9606 GN=GC PE=1 SV=1	>tr|D6RF20|D6RF20_HUMAN Vitamin D-binding protein (Fragment) OS=Homo sapiens OX=9606 GN=GC PE=1 SV=1	76	11	703
0.861625	0.0438328	0.763994	0.311325	0.318437	-0.350245	0.405843	-0.562489	0.10415	-0.34621	0.112339	0.637554	0.294511	0.489495	0.255414	0.204226	-0.174436	-0.108701	0.205373	-0.64699	1.47167	-0.555559	0.801656	0.854564	0.828097	0.842568	-0.484735	0.645017	-0.134702	-0.136354	0.528082	0.213524	0.0903352	0.063082	-0.0147664	-0.746487	-0.400291	0.265421	0.87207	0.0158921	2.41991	0.00380271	0.176263	-0.445015	Q92854	Semaphorin-4D OS=Homo sapiens OX=9606 GN=SEMA4D PE=1 SV=1	>sp|Q92854|SEM4D_HUMAN Semaphorin-4D OS=Homo sapiens OX=9606 GN=SEMA4D PE=1 SV=1	14	10	52
-0.586027	-0.602782	-0.570929	-1.78108	0.183156	0.65644	1.53894	0.533255	-0.181565	0.382956	0.275878	-0.648737	0.0151579	-0.493689	-0.325661	0.2082	0.296308	-0.297207	0.0563225	0.512048	0.596209	0.875586	-0.266602	-1.09282	0.602686	1.18916	0.440111	-0.643741	0.666566	-0.809507	-0.616215	-0.761298	-0.48651	1.31186	-0.922485	-0.316058	-0.525928	1.7792	-0.217302	1.6526	1.87733	0.0132639	0.176361	0.610755	M9MML0	Low affinity immunoglobulin gamma Fc region receptor III-A OS=Homo sapiens OX=9606 GN=FCGR3A PE=4 SV=2	>tr|M9MML0|M9MML0_HUMAN Low affinity immunoglobulin gamma Fc region receptor III-A OS=Homo sapiens OX=9606 GN=FCGR3A PE=4 SV=2	14	6	41
0.911625	0.454707	0.123581	0.661288	0.604037	0.100485	0.855844	-0.141843	0.821711	0.0171948	0.810792	0.398649	0.229527	1.15005	0.0639237	-0.796453	0.0588649	-0.693315	-0.117914	-0.943569	0.065006	-0.658541	-0.558925	0.421913	-0.268121	-0.291997	-1.66549	-0.135885	-1.17022	-0.362343	NaN	NaN	NaN	NaN	NaN	NaN	NaN	NaN	NaN	NaN	1.90974	0.0123101	0.176679	-0.591629	P18827	Syndecan-1 OS=Homo sapiens OX=9606 GN=SDC1 PE=1 SV=3	>sp|P18827|SDC1_HUMAN Syndecan-1 OS=Homo sapiens OX=9606 GN=SDC1 PE=1 SV=3	5	1	4
0.290836	0.280213	0.300682	0.376368	0.447038	-0.348418	0.463979	-0.86143	-0.0539313	-0.105282	-0.576739	0.649756	-0.308318	0.209628	-0.440162	-0.0918691	-0.829229	-0.853336	-0.463302	-0.718829	0.528255	-0.36039	0.914205	0.53104	0.0147243	0.364248	-1.0909	0.308369	-0.929527	0.0614972	0.44666	0.823785	-0.0998572	-0.438781	-0.343855	-0.383951	-0.181857	-0.43314	0.313212	0.0565757	2.40201	0.00396267	0.176976	-0.451111	P22303	Acetylcholinesterase OS=Homo sapiens OX=9606 GN=ACHE PE=1 SV=1	>sp|P22303|ACES_HUMAN Acetylcholinesterase OS=Homo sapiens OX=9606 GN=ACHE PE=1 SV=1	31	12	69
-0.977441	0.160714	-0.00367073	-0.718023	0.509029	0.0633395	0.0235614	-0.223792	-0.183917	0.0860719	0.126786	-1.36996	-0.0977317	-1.03873	-0.340123	0.0257038	0.827229	0.0965069	-0.494081	0.121039	-0.244696	-0.0374223	-0.130777	0.571949	-0.153656	0.25483	0.472467	0.286385	0.44868	0.134504	-0.981943	-0.31945	-0.855329	-0.176464	-0.317927	0.523251	0.360106	-0.368041	0.0195617	-0.252888	2.48345	0.00328513	0.17768	0.430769	P37173	TGF-beta receptor type-2 OS=Homo sapiens OX=9606 GN=TGFBR2 PE=1 SV=2	>sp|P37173|TGFR2_HUMAN TGF-beta receptor type-2 OS=Homo sapiens OX=9606 GN=TGFBR2 PE=1 SV=2	5	2	8
1.24272	0.380343	0.391256	0.162651	0.0777719	-1.21511	0.626621	-0.507035	-0.136537	-0.310432	0.178032	0.480895	0.739737	0.626382	0.514055	-0.209659	-0.456412	0.678775	0.385839	-0.225513	0.859797	-0.171984	0.810523	0.176301	0.309355	1.04082	-0.466645	0.195058	-0.375366	0.279846	0.0268307	1.11946	0.768117	-0.173981	-0.0176472	-0.929931	-0.33202	0.240835	0.794355	0.0606648	2.27889	0.00526149	0.177741	-0.468123	Q8IV08	Phospholipase D3 OS=Homo sapiens OX=9606 GN=PLD3 PE=1 SV=1	>sp|Q8IV08|PLD3_HUMAN Phospholipase D3 OS=Homo sapiens OX=9606 GN=PLD3 PE=1 SV=1	37	12	67
1.11475	0.156569	0.712471	0.132879	-0.55196	-0.352136	0.659113	-0.338418	-0.332315	0.332108	0.525648	0.39938	0.820282	0.298354	0.608941	-0.633348	-1.10399	-0.182583	0.346115	-0.650907	0.657363	-0.235193	0.124908	0.218501	0.0634436	0.332904	-1.05422	0.894641	-0.283334	-0.438773	0.0319434	0.556518	0.169689	-0.287035	-0.70469	-1.28622	-1.1355	-0.0758647	0.601118	-0.423219	2.15432	0.00700947	0.177942	-0.49688	O14514	Adhesion G protein-coupled receptor B1 OS=Homo sapiens OX=9606 GN=ADGRB1 PE=1 SV=2	>sp|O14514|AGRB1_HUMAN Adhesion G protein-coupled receptor B1 OS=Homo sapiens OX=9606 GN=ADGRB1 PE=1 SV=2	13	15	93
0.368875	0.721285	0.518167	0.277255	-0.092376	0.0211903	0.637722	-0.29353	-0.0407741	-0.300109	1.25864	-0.566005	0.752565	-0.15898	0.481562	-0.477021	-0.330744	0.118737	0.960347	-0.606418	0.589155	-0.552823	0.571033	0.457039	0.619138	0.675893	-0.815162	0.672256	-0.254917	-0.14955	1.08625	0.170602	0.72863	0.734851	0.166902	-0.615854	-0.5219	0.849328	-0.357894	-0.4876	2.24833	0.00564507	0.17807	-0.472388	A0A0A0MR25	Fibroblast growth factor receptor OS=Homo sapiens OX=9606 GN=FGFR2 PE=1 SV=1	>tr|A0A0A0MR25|A0A0A0MR25_HUMAN Fibroblast growth factor receptor OS=Homo sapiens OX=9606 GN=FGFR2 PE=1 SV=1	14	11	123
0.171024	0.228075	-0.114315	-0.402399	-0.31754	-0.0750953	-0.108748	-0.713288	0.217292	0.0266977	0.598074	0.548687	0.902772	0.105073	0.406534	-0.709778	-1.18262	-0.458028	0.653287	-0.791049	0.623175	-0.27388	0.562014	0.356566	0.625324	0.19853	-0.762415	0.655698	-0.623105	0.523126	0.54006	0.0495876	0.4901	0.474336	-0.111059	-0.690046	-0.479043	0.550889	0.543995	-0.438371	2.30908	0.00490812	0.179792	-0.456214	O14525	Astrotactin-1 OS=Homo sapiens OX=9606 GN=ASTN1 PE=2 SV=3	>sp|O14525|ASTN1_HUMAN Astrotactin-1 OS=Homo sapiens OX=9606 GN=ASTN1 PE=2 SV=3	17	15	48
-0.180121	-2.0666	-1.33265	0.222545	-0.0976847	-0.619746	-1.39577	1.72263	0.385793	-0.796021	-2.12111	-1.37977	-1.87324	-1.46088	-1.45844	-1.13647	-0.451269	-0.729862	0.157916	3.12976	-1.25607	1.66966	-0.547864	-0.525131	-0.400726	-0.949231	1.22189	-1.08583	1.75676	0.407259	-1.53443	0.268345	-0.566602	-0.654012	-0.872838	2.3311	0.140562	-1.2289	-0.72885	-1.60187	1.54516	0.0284999	0.182889	0.834875	P00491	Purine nucleoside phosphorylase OS=Homo sapiens OX=9606 GN=PNP PE=1 SV=2	>sp|P00491|PNPH_HUMAN Purine nucleoside phosphorylase OS=Homo sapiens OX=9606 GN=PNP PE=1 SV=2	13	3	8
-0.308822	-0.799273	-0.458857	-3.23785	-0.0659413	-0.101135	-0.362475	0.462089	-0.848907	3.04033	-0.884299	1.46459	-0.51508	1.13553	0.768572	-0.572497	0.457286	-0.0935225	2.30918	0.56203	-0.0544957	-0.205012	-2.69109	-4.31455	-2.20819	-0.776783	-1.40938	-0.0233914	-2.04574	-0.359223	-4.22168	-3.0028	-7.60676	-0.881611	-0.75553	-1.65017	1.23849	0.672705	-0.194661	-4.07496	1.36962	0.0426956	0.182971	1.25362	A0A0C4DH29	Immunoglobulin heavy variable 1-3 OS=Homo sapiens OX=9606 GN=IGHV1-3 PE=3 SV=1	>sp|A0A0C4DH29|HV103_HUMAN Immunoglobulin heavy variable 1-3 OS=Homo sapiens OX=9606 GN=IGHV1-3 PE=3 SV=1	41	4	60
0.67522	0.0663101	0.565068	0.434589	-0.48259	-0.193984	0.264332	-0.466006	0.442509	-0.626186	-1.08814	0.57618	-0.0673071	0.411936	0.246082	-0.204011	-1.56609	-0.0518457	0.037888	-0.256336	0.213149	-0.209326	0.624014	0.427523	0.664401	0.625772	-1.19832	0.598288	-0.814606	0.187867	1.38199	0.224353	0.727559	-0.0550468	0.198571	-0.746754	-0.554426	-0.0183404	0.148348	0.140059	2.12275	0.00753792	0.183039	-0.489319	Q14894	Ketimine reductase mu-crystallin OS=Homo sapiens OX=9606 GN=CRYM PE=1 SV=1	>sp|Q14894|CRYM_HUMAN Ketimine reductase mu-crystallin OS=Homo sapiens OX=9606 GN=CRYM PE=1 SV=1	57	11	39
0.652311	0.775129	0.841107	0.511074	-0.656252	0.140484	0.764925	0.0453048	-0.470105	0.459527	0.829226	0.222068	0.961775	0.0439437	0.945183	-1.82613	-1.09688	-0.861978	0.658157	-0.684386	0.766459	-0.0604005	0.212112	0.206215	1.14255	0.891927	-0.0760393	0.906565	0.10859	0.140501	0.705263	-0.521771	0.453589	0.450387	0.525482	-0.187224	-0.621174	0.412528	0.308549	-0.481382	2.01274	0.00971081	0.183146	-0.523685	Q9NX62	Inositol monophosphatase 3 OS=Homo sapiens OX=9606 GN=IMPAD1 PE=1 SV=1	>sp|Q9NX62|IMPA3_HUMAN Inositol monophosphatase 3 OS=Homo sapiens OX=9606 GN=IMPAD1 PE=1 SV=1	43	12	226
0.624737	0.234538	-0.554524	-0.841643	-0.723477	0.771406	-0.982355	1.48379	-1.08557	-1.17071	-1.49189	-1.45957	-1.34713	-1.87959	-1.34214	-1.34225	-0.532632	-0.94446	-0.867755	1.23754	-1.29441	-0.178623	-1.18551	-1.16121	-0.867651	-1.56478	1.12156	-0.666926	1.09912	1.77979	-0.0422849	-0.00433585	-0.442301	-0.836779	-0.473423	1.40525	-0.08668	0.526977	-1.71655	0.577149	1.66976	0.0213912	0.183586	0.715457	P67936	Tropomyosin alpha-4 chain OS=Homo sapiens OX=9606 GN=TPM4 PE=1 SV=3	>sp|P67936|TPM4_HUMAN Tropomyosin alpha-4 chain OS=Homo sapiens OX=9606 GN=TPM4 PE=1 SV=3	34	10	26
-0.248024	-0.837466	-2.85895	-1.50451	-2.08054	-2.05569	-3.1596	-1.99353	-0.851228	-0.94483	-0.694491	-3.37127	-1.76561	-3.27289	-2.02459	-0.887877	-1.44372	-1.21276	3.00342	0.18896	-2.72282	-2.10646	-2.096	-1.93672	-2.53054	-2.72931	1.61205	-0.896785	0.481039	6.28291	-3.23699	-1.70621	-1.23391	0.75105	2.63398	1.7733	-0.829171	-1.0475	0.122795	-3.21729	1.36399	0.0432522	0.183955	1.25191	P20851	C4b-binding protein beta chain OS=Homo sapiens OX=9606 GN=C4BPB PE=1 SV=1	>sp|P20851|C4BPB_HUMAN C4b-binding protein beta chain OS=Homo sapiens OX=9606 GN=C4BPB PE=1 SV=1	39	8	30
0.4501	0.199354	0.509473	0.450521	-0.173178	-0.02792	0.777183	-0.0748083	-0.283341	-0.296155	0.510674	0.324432	0.620076	0.601975	0.856988	0.0784301	-0.500195	-0.299009	0.194215	0.013701	0.603082	0.303684	0.447774	0.119448	1.05452	0.720694	0.365989	0.663522	0.0143513	-0.128381	1.14627	-0.654879	0.829003	0.796098	0.271239	-0.504793	-0.413866	0.869889	0.0200629	-0.211546	2.47472	0.00335182	0.184681	-0.414431	P07195	L-lactate dehydrogenase B chain OS=Homo sapiens OX=9606 GN=LDHB PE=1 SV=2	>sp|P07195|LDHB_HUMAN L-lactate dehydrogenase B chain OS=Homo sapiens OX=9606 GN=LDHB PE=1 SV=2	55	18	262
-4.26202	-4.44852	-4.78267	-4.39705	-2.96223	-3.49783	-5.08008	5.23804	-4.15214	-2.11618	-1.98375	-2.92475	-3.30642	1.32875	-3.51528	2.5727	-0.884105	-1.98879	-2.14676	-1.00914	-4.39564	-2.21169	-4.74508	-2.79531	-3.0824	-3.80642	-3.65965	-2.49689	8.6325	-1.75981	4.16645	-3.35668	-1.91196	-2.59976	-2.65228	3.2911	-1.97586	-0.8978	-2.76047	-0.510109	1.27046	0.0536466	0.184727	1.79153	176	KCRM_HUMAN	>gi|176| KCRM_HUMAN;>sp|P06732|KCRM_HUMAN Creatine kinase M-type OS=Homo sapiens OX=9606 GN=CKM PE=1 SV=2	46	14	49
-0.131369	0.122284	0.091699	0.203784	-0.196034	-0.698402	-0.0101989	-0.397582	0.0230128	-0.217019	0.601347	0.699287	0.0349344	0.653039	0.383511	0.0293388	-0.315334	-0.0906912	-0.0787949	-0.411575	0.605728	-0.378625	0.175479	0.648726	0.695773	0.274235	0.048989	0.125354	0.302132	-0.128453	0.606286	-0.109769	0.181572	0.147413	0.278776	-0.142296	0.106607	0.10589	0.0985067	-0.167698	3.18978	0.000645985	0.18526	-0.342891	O75063	Glycosaminoglycan xylosylkinase OS=Homo sapiens OX=9606 GN=FAM20B PE=1 SV=1	>sp|O75063|XYLK_HUMAN Glycosaminoglycan xylosylkinase OS=Homo sapiens OX=9606 GN=FAM20B PE=1 SV=1	38	12	81
0.699164	0.480509	0.761983	0.454518	-0.175918	-0.0901641	0.698419	-0.0142427	0.111062	0.0778487	0.54609	0.369577	1.06248	0.151804	0.409612	-0.433097	-1.06585	-0.590026	0.642868	-0.64312	0.623599	0.107742	0.222077	-0.222569	0.328893	0.249781	-0.776852	0.575308	-0.317105	-0.61197	0.699504	-0.442246	0.359229	0.166988	-0.633352	-1.16409	-0.71999	0.880755	-0.181511	0.0286378	2.18116	0.00658925	0.186609	-0.465651	P13591	Neural cell adhesion molecule 1 OS=Homo sapiens OX=9606 GN=NCAM1 PE=1 SV=3	>sp|P13591|NCAM1_HUMAN Neural cell adhesion molecule 1 OS=Homo sapiens OX=9606 GN=NCAM1 PE=1 SV=3	53	40	1824
0.0103626	-0.0341894	0.300555	0.408529	0.522542	2.38307	0.674224	0.437842	0.414527	0.0795324	-0.286215	-0.471257	-0.0823993	-0.165308	0.107233	-0.0469597	0.31757	0.868791	0.284734	0.719745	0.25503	-0.378754	0.65208	0.0943404	0.724858	1.0397	0.937497	-0.021938	1.02868	-0.270289	0.451291	-0.163942	-0.2415	-0.121136	-0.166194	-0.228599	1.07157	-0.0867973	0.278779	0.699604	2.20618	0.00622041	0.186962	0.458267	Q01469	Fatty acid-binding protein 5 OS=Homo sapiens OX=9606 GN=FABP5 PE=1 SV=3	>sp|Q01469|FABP5_HUMAN Fatty acid-binding protein 5 OS=Homo sapiens OX=9606 GN=FABP5 PE=1 SV=3	66	9	76
0.85987	0.30246	1.54453	0.794666	0.0332468	0.17455	1.33506	0.958701	-0.477289	0.744147	0.59332	0.449616	1.73037	0.261881	1.57897	0.0594703	-1.30706	-0.0697245	0.75661	-0.727378	0.453973	0.371184	0.469909	0.411254	0.777892	0.575545	-0.500689	0.884192	-0.175669	-0.873168	1.05958	-0.374056	0.726888	0.389997	-0.0475637	-0.972594	-0.991969	1.37602	-0.14891	0.485691	1.86458	0.0136589	0.187204	-0.564123	P13521	Secretogranin-2 OS=Homo sapiens OX=9606 GN=SCG2 PE=1 SV=2	>sp|P13521|SCG2_HUMAN Secretogranin-2 OS=Homo sapiens OX=9606 GN=SCG2 PE=1 SV=2	71	39	920
0.582788	0.546146	1.11971	1.12138	0.308933	-0.34149	0.61734	0.212758	-0.0433634	-0.561395	-0.167108	0.378788	0.522455	0.237151	0.274228	0.0395645	-0.882468	-0.182513	0.686057	-0.00699878	0.537886	-0.115454	0.256088	0.204915	0.452691	0.39009	-0.546397	0.263322	-0.0664567	-0.904969	0.388264	-0.142101	0.580944	-0.413314	-0.232538	-0.970271	-0.502556	0.90164	-0.529489	-0.0244084	2.27931	0.00525637	0.187563	-0.444693	Q14515	SPARC-like protein 1 OS=Homo sapiens OX=9606 GN=SPARCL1 PE=1 SV=2	>sp|Q14515|SPRL1_HUMAN SPARC-like protein 1 OS=Homo sapiens OX=9606 GN=SPARCL1 PE=1 SV=2	66	36	1317
0.723328	0.199901	0.953547	0.475832	0.517452	-0.831068	0.428198	-0.898628	-0.305518	-0.548746	-0.653423	1.87664	-0.716093	1.40352	0.914749	-0.872474	-0.578891	-0.0585677	0.509041	-0.397876	0.948559	-0.161192	0.795077	1.24006	0.752989	0.468332	0.694935	1.08643	0.113118	0.34329	1.15116	0.616741	0.188563	0.0839362	-0.187299	-0.133082	0.360532	0.0325704	1.33759	-0.468007	1.90228	0.0125232	0.188063	-0.542144	Q8N475	Follistatin-related protein 5 OS=Homo sapiens OX=9606 GN=FSTL5 PE=2 SV=2	>sp|Q8N475|FSTL5_HUMAN Follistatin-related protein 5 OS=Homo sapiens OX=9606 GN=FSTL5 PE=2 SV=2	47	33	214
0.499196	0.577658	0.943227	0.527347	-0.264998	-0.169093	0.581167	0.0114626	-0.20611	-0.213097	0.0656745	0.532209	0.495466	0.311792	0.208041	0.13774	-0.272457	-0.00725437	0.208023	0.434528	0.955933	0.0563724	0.374557	0.216618	0.642157	0.20312	-0.294989	0.712772	0.152706	0.356162	1.27598	-0.0810408	1.3736	0.471566	-0.124105	-0.818059	-0.649278	0.667981	-0.00231711	0.00896054	2.42209	0.0037836	0.188249	-0.410764	P40925	Malate dehydrogenase, cytoplasmic OS=Homo sapiens OX=9606 GN=MDH1 PE=1 SV=4	>sp|P40925|MDHC_HUMAN Malate dehydrogenase, cytoplasmic OS=Homo sapiens OX=9606 GN=MDH1 PE=1 SV=4	41	15	146
0.613191	0.0806522	0.642225	0.203405	-0.510605	0.0590427	0.138683	-0.157199	-0.702813	0.153704	0.0960712	0.656292	0.562124	0.575126	1.08004	0.49511	-1.25648	-0.532933	1.10755	-0.325504	0.364579	-0.436055	0.105749	-0.27707	-0.063667	-0.344434	-1.46831	0.0181033	-0.567179	-1.12376	0.598364	0.138946	0.576986	0.10999	0.120765	-0.261783	-0.39283	0.375752	0.805403	-0.263313	2.05743	0.00876126	0.188333	-0.474015	P16519	Neuroendocrine convertase 2 OS=Homo sapiens OX=9606 GN=PCSK2 PE=1 SV=2	>sp|P16519|NEC2_HUMAN Neuroendocrine convertase 2 OS=Homo sapiens OX=9606 GN=PCSK2 PE=1 SV=2	29	13	100
1.45893	0.942762	1.46501	1.7235	0.84195	-1.1192	0.236977	-0.730573	-0.774892	-0.523729	-1.25123	3.33866	-1.02366	3.20222	2.15096	2.07262	-1.26556	-0.438065	-0.0491366	-1.75734	0.236759	0.156434	0.226485	0.0117847	-0.163192	-0.21816	-1.49761	-0.91273	-0.321999	-0.450928	0.268915	-1.3079	2.0747	-0.497778	-0.720656	-0.375208	0.502834	0.339909	2.49623	0.67713	1.48421	0.0327933	0.188604	-0.862205	E9PGA6	C1QTNF3-AMACR readthrough (NMD candidate) OS=Homo sapiens OX=9606 GN=C1QTNF3-AMACR PE=4 SV=1	>tr|E9PGA6|E9PGA6_HUMAN C1QTNF3-AMACR readthrough (NMD candidate) OS=Homo sapiens OX=9606 GN=C1QTNF3-AMACR PE=4 SV=1	14	4	20
0.0568572	-0.0328868	0.506072	0.999926	-0.0799518	-0.228824	0.384211	0.0147122	-0.383685	-0.160603	-1.11961	1.35337	0.88541	0.669007	0.351472	-0.016947	-0.819047	-0.110569	0.736076	0.0702154	1.32447	0.731864	1.69811	0.865465	0.946492	0.651308	0.231961	0.54724	-0.182833	0.070915	1.02272	2.31767	1.02662	-0.597502	-0.165017	-0.793652	0.92135	-0.212361	-0.269697	1.27113	1.83232	0.0147124	0.188611	-0.551982	A0A087WUD8	Vascular endothelial growth factor A OS=Homo sapiens OX=9606 GN=VEGFA PE=1 SV=1	>tr|A0A087WUD8|A0A087WUD8_HUMAN Vascular endothelial growth factor A OS=Homo sapiens OX=9606 GN=VEGFA PE=1 SV=1	4	2	9
0.0188886	0.216488	0.381763	-0.124109	-0.391792	-0.121251	0.306228	-0.17572	-0.337428	-0.205379	1.03926	-0.114625	1.31792	0.365031	0.854179	-0.615569	-1.52704	-0.8688	0.381575	-0.63905	0.248883	0.244968	-0.160573	0.0485031	0.290049	0.134602	-0.435958	0.427668	0.0493351	-0.329745	1.53705	-0.606765	0.389788	1.09618	0.174917	-0.948751	-1.07884	1.02819	-0.0328248	1.27048	1.94304	0.0114014	0.18866	-0.527214	A0A2R8Y6X2	D-aminoacyl-tRNA deacylase OS=Homo sapiens OX=9606 GN=DTD1 PE=1 SV=1	>tr|A0A2R8Y6X2|A0A2R8Y6X2_HUMAN D-aminoacyl-tRNA deacylase OS=Homo sapiens OX=9606 GN=DTD1 PE=1 SV=1	39	7	22
0.380822	0.436193	0.360185	0.262224	-0.380313	-0.24369	0.634895	-0.346034	-0.601348	0.25251	0.300439	0.520062	0.770161	0.333884	0.80978	-0.25775	-0.880412	-0.605599	0.216978	-0.802592	-0.22465	-0.51987	-0.308584	0.254191	-0.255155	-0.0269513	-0.875792	0.154596	-0.774854	-0.46354	0.595979	-0.813249	0.669989	0.765993	0.0458944	-0.587314	-0.730594	1.14331	-0.0771121	-0.199522	2.14902	0.00709544	0.189254	-0.45374	A0A087WYL5	Seizure 6-like protein 2 OS=Homo sapiens OX=9606 GN=SEZ6L2 PE=1 SV=1	>tr|A0A087WYL5|A0A087WYL5_HUMAN Seizure 6-like protein 2 OS=Homo sapiens OX=9606 GN=SEZ6L2 PE=1 SV=1	24	19	228
-0.163052	0.214738	-0.31783	-0.808497	-0.613399	-0.923427	-0.345561	-0.9821	-0.167324	-0.469542	0.224373	0.712331	0.406708	0.314931	0.887916	0.0936662	-0.450925	-0.256705	0.324257	-0.339624	0.449453	-0.300107	0.42961	0.175211	0.115234	-0.0543417	-0.438069	-0.0129594	-0.28744	-0.430777	0.206725	0.00151035	0.166919	-0.00398585	-0.236613	-0.955196	-0.97671	0.00146919	0.416348	-0.000839728	2.43853	0.00364307	0.189272	-0.405899	R4GMM8	Roundabout homolog 2 (Fragment) OS=Homo sapiens OX=9606 GN=ROBO2 PE=1 SV=1	>tr|R4GMM8|R4GMM8_HUMAN Roundabout homolog 2 (Fragment) OS=Homo sapiens OX=9606 GN=ROBO2 PE=1 SV=1	40	35	152
0.266046	-0.50917	0.185415	-0.29472	0.170394	-0.217086	-0.260159	0.0944173	0.404697	-0.344481	0.308173	-0.23362	0.280244	-0.233317	0.173107	0.595852	0.0878828	0.242701	-0.0809488	1.2913	-0.0647619	-0.370926	-0.179311	-0.18026	-0.0597595	0.340474	1.18836	0.512796	1.29918	0.189142	0.276364	-0.944275	0.280876	-0.10718	-0.54641	-0.272424	0.598009	0.260427	-0.162209	0.745294	2.34464	0.0045223	0.189465	0.414816	A0A0B4J2C3	Translationally-controlled tumor protein OS=Homo sapiens OX=9606 GN=TPT1 PE=1 SV=1	>tr|A0A0B4J2C3|A0A0B4J2C3_HUMAN Translationally-controlled tumor protein OS=Homo sapiens OX=9606 GN=TPT1 PE=1 SV=1	23	4	10
NaN	NaN	NaN	NaN	NaN	NaN	NaN	NaN	NaN	NaN	NaN	NaN	NaN	NaN	NaN	NaN	NaN	NaN	NaN	NaN	-0.954464	-0.125951	-1.08441	-0.785706	-0.661782	-0.640068	-0.405351	0.144246	1.04212	0.933459	NaN	NaN	NaN	NaN	NaN	NaN	NaN	NaN	NaN	NaN	1.41527	0.0384353	0.189466	0.937344	Q14353	Guanidinoacetate N-methyltransferase OS=Homo sapiens OX=9606 GN=GAMT PE=1 SV=1	>sp|Q14353|GAMT_HUMAN Guanidinoacetate N-methyltransferase OS=Homo sapiens OX=9606 GN=GAMT PE=1 SV=1	9	1	1
1.03836	0.486802	0.439417	0.0162359	0.147138	0.125728	0.219797	-0.647975	-0.0598766	-0.430362	-0.0151909	0.753352	0.0130622	1.01111	0.0258934	0.0549774	-0.426088	-0.214655	-0.333359	-0.58229	0.513575	-0.479369	0.955774	1.89366	-0.0755965	0.762321	-0.27522	1.06591	-0.285406	0.603931	0.189763	0.56707	0.372522	0.370683	0.338755	-0.237632	-0.163307	-0.322255	0.471316	0.191799	2.21207	0.00613665	0.189519	-0.452283	Q86Y38	Xylosyltransferase 1 OS=Homo sapiens OX=9606 GN=XYLT1 PE=1 SV=1	>sp|Q86Y38|XYLT1_HUMAN Xylosyltransferase 1 OS=Homo sapiens OX=9606 GN=XYLT1 PE=1 SV=1	36	31	196
-0.676754	0.0724317	-1.30223	-0.531911	-0.188987	-0.0614264	-0.0735686	-0.0463047	0.607053	0.648978	0.213381	-0.374724	0.414769	-0.1143	0.107367	1.35112	0.457002	0.784138	-0.791942	1.51125	NaN	NaN	NaN	NaN	NaN	NaN	NaN	NaN	NaN	NaN	NaN	NaN	NaN	NaN	NaN	NaN	NaN	NaN	NaN	NaN	1.62863	0.0235161	0.189546	0.676726	Q5SRI9	Glycoprotein endo-alpha-1,2-mannosidase OS=Homo sapiens OX=9606 GN=MANEA PE=1 SV=1	>sp|Q5SRI9|MANEA_HUMAN Glycoprotein endo-alpha-1,2-mannosidase OS=Homo sapiens OX=9606 GN=MANEA PE=1 SV=1	14	3	7
1.54669	-1.46503	-0.000698089	-0.269616	0.376331	-1.15432	-0.353664	-1.73968	-1.32164	0.902989	-1.30772	-1.04905	-0.040194	-1.94121	-1.10592	-0.554786	0.301518	0.285409	-1.79507	-1.35756	-2.00995	-1.32911	-2.39836	-2.37234	0.0191369	0.249399	-2.11815	0.0252479	-0.332481	8.32198	-1.51181	-4.21066	-5.25896	-1.18803	-1.36833	0.0852037	-0.269568	2.57357	-1.99755	-1.55011	1.31333	0.0486043	0.189798	1.25428	A0A075B6J9	Immunoglobulin lambda variable 2-18 OS=Homo sapiens OX=9606 GN=IGLV2-18 PE=3 SV=2	>sp|A0A075B6J9|LV218_HUMAN Immunoglobulin lambda variable 2-18 OS=Homo sapiens OX=9606 GN=IGLV2-18 PE=3 SV=2	25	2	19
0.946431	0.676419	0.32719	0.15598	-0.799343	-0.492812	0.86449	-0.767243	-0.875008	0.0120264	0.814938	-0.145279	1.42468	0.17178	0.14204	-0.737366	-1.33552	-0.59931	0.961589	-0.300862	0.98133	-0.518065	0.996221	0.551459	0.912871	0.673437	-0.833397	1.12104	-0.211486	-0.0201673	1.09599	0.177378	0.837416	0.487089	-0.0205899	-0.908605	-1.20539	1.17547	0.919523	0.350799	1.82699	0.014894	0.189958	-0.571237	P52797	Ephrin-A3 OS=Homo sapiens OX=9606 GN=EFNA3 PE=1 SV=1	>sp|P52797|EFNA3_HUMAN Ephrin-A3 OS=Homo sapiens OX=9606 GN=EFNA3 PE=1 SV=1	7	1	20
-0.19192	0.418046	0.579702	1.02389	0.591898	0.153362	0.319223	0.402488	0.268973	0.194571	0.88222	-0.403396	0.274844	0.351156	-0.214052	-0.719318	-0.327333	-0.276954	0.831156	-0.291352	1.12498	0.253898	0.782449	0.208945	0.335228	0.118083	-0.877164	-0.307272	-0.0226814	-0.817509	0.249376	0.822363	0.13708	0.0171199	-0.336195	-0.724165	-0.492225	0.718258	-0.374338	0.38759	2.22814	0.00591374	0.19002	-0.437212	Q9BX67	Junctional adhesion molecule C OS=Homo sapiens OX=9606 GN=JAM3 PE=1 SV=1	>sp|Q9BX67|JAM3_HUMAN Junctional adhesion molecule C OS=Homo sapiens OX=9606 GN=JAM3 PE=1 SV=1	31	7	67
0.0499067	-1.43538	0.336369	-0.265294	-0.864432	-0.15909	0.352596	0.681877	1.44922	0.155171	-0.176602	-0.657712	-0.45718	0.204185	-2.99886	-0.18633	-0.919905	0.564119	0.644778	0.851588	-0.00917457	0.61313	0.623687	-0.974664	0.672732	-0.255379	0.572111	0.235677	0.62401	-0.312633	-0.3065	-0.483683	0.64731	0.0667727	0.00613427	-0.0679958	0.232242	1.02662	-0.1482	0.670213	1.76506	0.0171768	0.190171	0.570997	P31995	Low affinity immunoglobulin gamma Fc region receptor II-c OS=Homo sapiens OX=9606 GN=FCGR2C PE=1 SV=1	>sp|P31995|FCG2C_HUMAN Low affinity immunoglobulin gamma Fc region receptor II-c OS=Homo sapiens OX=9606 GN=FCGR2C PE=1 SV=1	11	3	22
-0.155876	0.0723841	0.603843	0.0939488	-0.0529569	0.310647	0.857106	0.565866	0.0776608	-0.575111	NaN	NaN	NaN	NaN	NaN	NaN	NaN	NaN	NaN	NaN	0.0103399	0.00525894	-0.178647	-0.138363	0.353033	0.494103	0.430801	0.386792	0.793455	-0.227991	-1.05988	-0.42812	-0.680509	-0.763477	-0.914258	-0.11439	1.27937	-0.362915	0.179853	-0.0670007	1.97507	0.0105909	0.190332	0.484101	P54725	UV excision repair protein RAD23 homolog A OS=Homo sapiens OX=9606 GN=RAD23A PE=1 SV=1	>sp|P54725|RD23A_HUMAN UV excision repair protein RAD23 homolog A OS=Homo sapiens OX=9606 GN=RAD23A PE=1 SV=1	21	6	27
NaN	NaN	NaN	NaN	NaN	NaN	NaN	NaN	NaN	NaN	NaN	NaN	NaN	NaN	NaN	NaN	NaN	NaN	NaN	NaN	-0.640399	-0.455016	-0.601052	-0.783647	-0.271317	-0.367006	0.599664	-0.354894	1.10541	0.12024	NaN	NaN	NaN	NaN	NaN	NaN	NaN	NaN	NaN	NaN	1.49677	0.0318586	0.190352	0.77097	I3L0M9	Elongin-B (Fragment) OS=Homo sapiens OX=9606 GN=ELOB PE=1 SV=1	>tr|I3L0M9|I3L0M9_HUMAN Elongin-B (Fragment) OS=Homo sapiens OX=9606 GN=ELOB PE=1 SV=1	24	2	3
-0.138849	0.439693	-0.01839	-0.116749	0.0905458	-0.241013	0.271356	0.0630087	-0.0720004	-0.266649	0.727572	0.590745	-0.006227	1.51544	0.738504	-1.10072	0.170352	-0.139461	0.28728	-1.03807	0.596582	0.200086	0.116979	1.54772	0.135705	0.127708	-1.14177	0.200195	0.328064	0.532309	0.323361	0.239556	-0.394444	0.589946	-0.113789	0.530489	-0.292849	0.506233	-0.593872	-0.21037	2.09472	0.00804038	0.190545	-0.457188	D6RGZ6	Versican core protein (Fragment) OS=Homo sapiens OX=9606 GN=VCAN PE=1 SV=1	>tr|D6RGZ6|D6RGZ6_HUMAN Versican core protein (Fragment) OS=Homo sapiens OX=9606 GN=VCAN PE=1 SV=1	17	17	92
0.586634	0.498476	0.0877046	-0.0156482	-0.0900108	-0.632429	0.408026	-0.938852	-0.0194763	-0.157625	0.395787	0.454181	0.709832	0.17784	0.326744	-0.378789	-0.514962	0.291007	0.945044	-0.404395	0.750889	-0.354993	0.474612	0.746497	0.458662	0.542663	-0.264462	0.742062	-0.529476	-0.263351	0.653459	0.180286	0.438089	0.919908	0.155409	-0.374683	-0.15436	0.322421	0.801632	-0.186908	2.35718	0.00439355	0.190721	-0.416064	O14917	Protocadherin-17 OS=Homo sapiens OX=9606 GN=PCDH17 PE=2 SV=2	>sp|O14917|PCD17_HUMAN Protocadherin-17 OS=Homo sapiens OX=9606 GN=PCDH17 PE=2 SV=2	25	19	145
NaN	NaN	NaN	NaN	NaN	NaN	NaN	NaN	NaN	NaN	-1.57792	1.57968	1.21474	1.22535	0.185999	-0.830953	-1.19386	-0.137429	0.641178	-0.340813	1.34289	0.301756	0.746636	1.09398	0.316216	-0.40527	-1.83469	0.366789	-0.879141	-0.0229791	1.88764	2.05976	1.44203	-2.88271	-2.00085	-1.70102	0.169875	-0.51058	-0.724045	0.338208	1.4265	0.037454	0.191204	-0.933329	M0QZL2	Multiple epidermal growth factor-like domains protein 8 (Fragment) OS=Homo sapiens OX=9606 GN=MEGF8 PE=1 SV=1	>tr|M0QZL2|M0QZL2_HUMAN Multiple epidermal growth factor-like domains protein 8 (Fragment) OS=Homo sapiens OX=9606 GN=MEGF8 PE=1 SV=1	50	5	30
-0.889226	0.259844	-1.07573	-0.55848	-1.1317	0.709763	-1.88455	1.45001	-1.62123	-2.17033	-0.232206	-0.799073	-0.82397	-0.917586	-1.80353	-0.538213	-0.321185	-0.835193	-0.347732	1.15426	-1.6769	-0.408692	-1.4007	-1.46201	-0.69227	-1.2766	1.72397	-0.459815	3.92963	0.402534	0.171678	-0.293993	-0.969393	0.311892	-0.386502	0.680287	1.89406	-0.0260687	-1.28387	-0.00873935	1.48719	0.0325697	0.191346	0.797477	P04792	Heat shock protein beta-1 OS=Homo sapiens OX=9606 GN=HSPB1 PE=1 SV=2	>sp|P04792|HSPB1_HUMAN Heat shock protein beta-1 OS=Homo sapiens OX=9606 GN=HSPB1 PE=1 SV=2	50	7	18
0.295567	-0.117867	0.430352	-0.100663	0.000169519	-0.392238	-0.715273	-0.613081	-0.701209	-0.818633	-0.416579	0.194404	0.233871	0.108957	-0.151548	0.248549	-0.090555	-0.0901482	-0.00386358	-0.690967	NaN	NaN	NaN	NaN	NaN	NaN	NaN	NaN	NaN	NaN	NaN	NaN	NaN	NaN	NaN	NaN	NaN	NaN	NaN	NaN	2.15215	0.00704453	0.191633	-0.434408	P43007	Neutral amino acid transporter A OS=Homo sapiens OX=9606 GN=SLC1A4 PE=1 SV=1	>sp|P43007|SATT_HUMAN Neutral amino acid transporter A OS=Homo sapiens OX=9606 GN=SLC1A4 PE=1 SV=1	2	1	3
0.516625	0.551734	0.85924	0.0737571	0.556563	0.308072	0.703815	0.0529687	-0.229428	0.394276	0.666442	0.552482	1.12776	0.887073	0.691199	-0.0990151	0.249321	0.27198	0.784778	-0.61396	NaN	NaN	NaN	NaN	NaN	NaN	NaN	NaN	NaN	NaN	NaN	NaN	NaN	NaN	NaN	NaN	NaN	NaN	NaN	NaN	2.02513	0.00943772	0.191767	-0.466006	Q8IYR6	Tomoregulin-1 OS=Homo sapiens OX=9606 GN=TMEFF1 PE=1 SV=1	>sp|Q8IYR6|TEFF1_HUMAN Tomoregulin-1 OS=Homo sapiens OX=9606 GN=TMEFF1 PE=1 SV=1	7	3	4
NaN	NaN	NaN	NaN	NaN	NaN	NaN	NaN	NaN	NaN	NaN	NaN	NaN	NaN	NaN	NaN	NaN	NaN	NaN	NaN	0.323935	0.905189	0.856603	0.800618	0.484176	0.310247	-0.326276	0.147761	0.0998228	0.477036	NaN	NaN	NaN	NaN	NaN	NaN	NaN	NaN	NaN	NaN	1.77853	0.0166522	0.192644	-0.532386	P22735	Protein-glutamine gamma-glutamyltransferase K OS=Homo sapiens OX=9606 GN=TGM1 PE=1 SV=4	>sp|P22735|TGM1_HUMAN Protein-glutamine gamma-glutamyltransferase K OS=Homo sapiens OX=9606 GN=TGM1 PE=1 SV=4	3	2	2
0.660383	0.120857	0.4646	0.241161	0.303656	-0.29157	0.588632	-0.0909045	0.183485	0.0280255	0.787122	-0.0137116	0.897528	0.247997	0.691622	-0.675751	-0.654095	-0.36069	0.66935	-0.32348	0.572938	-0.334106	0.00709425	-0.681697	-0.0476714	-0.70273	-1.19312	0.0628838	-0.779048	-0.619942	0.473109	-0.548125	0.283753	0.491961	-0.374353	-0.903913	-0.527562	0.811327	0.0179965	0.137276	2.11333	0.0077031	0.197868	-0.443397	Q13740	CD166 antigen OS=Homo sapiens OX=9606 GN=ALCAM PE=1 SV=2	>sp|Q13740|CD166_HUMAN CD166 antigen OS=Homo sapiens OX=9606 GN=ALCAM PE=1 SV=2	45	21	378
1.01382	0.249146	1.24825	0.973662	0.164849	0.0796935	0.98656	0.626175	-0.63112	0.335441	-0.0260005	0.794762	1.33818	0.471921	0.690078	-0.157309	-1.47479	-0.877	0.67597	-0.367559	0.356962	-0.00979087	0.107291	-0.173017	0.86643	0.467225	-0.554116	0.609557	-0.34556	-0.628139	1.26078	0.158926	0.647662	-0.639196	-0.930922	-1.81618	-0.784729	1.06737	-0.410799	0.601931	1.74119	0.0181472	0.200074	-0.558059	O75509	Tumor necrosis factor receptor superfamily member 21 OS=Homo sapiens OX=9606 GN=TNFRSF21 PE=1 SV=1	>sp|O75509|TNR21_HUMAN Tumor necrosis factor receptor superfamily member 21 OS=Homo sapiens OX=9606 GN=TNFRSF21 PE=1 SV=1	17	9	91
-0.479511	0.0980081	-0.771368	-0.293101	-0.0770604	1.23938	0.409268	0.207623	1.72589	-0.353763	NaN	NaN	NaN	NaN	NaN	NaN	NaN	NaN	NaN	NaN	NaN	NaN	NaN	NaN	NaN	NaN	NaN	NaN	NaN	NaN	NaN	NaN	NaN	NaN	NaN	NaN	NaN	NaN	NaN	NaN	1.34117	0.0455855	0.200222	0.950287	Q14213	Interleukin-27 subunit beta OS=Homo sapiens OX=9606 GN=EBI3 PE=1 SV=2	>sp|Q14213|IL27B_HUMAN Interleukin-27 subunit beta OS=Homo sapiens OX=9606 GN=EBI3 PE=1 SV=2	10	2	3
0.289314	0.440502	0.278446	-0.313323	-0.384685	-0.246133	0.572976	-0.19081	-0.717113	-0.476084	NaN	NaN	NaN	NaN	NaN	NaN	NaN	NaN	NaN	NaN	0.301545	0.616429	0.427144	0.347043	0.405722	-0.203644	-0.0432971	-0.669805	-0.490157	0.0343742	0.717998	0.0236117	-0.239965	0.105685	-0.246456	0.243721	-0.104557	-0.807262	-0.241332	0.0852957	2.29709	0.00504557	0.200243	-0.401523	Q92542	Nicastrin OS=Homo sapiens OX=9606 GN=NCSTN PE=1 SV=2	>sp|Q92542|NICA_HUMAN Nicastrin OS=Homo sapiens OX=9606 GN=NCSTN PE=1 SV=2	3	2	5
0.421821	0.0384162	0.390998	0.397459	0.556641	-0.231825	0.079418	0.0880738	0.162016	-0.258776	0.282362	0.457543	0.132284	0.749885	0.256935	-0.182259	0.161094	0.00757208	-0.0482149	-0.177033	0.510347	-0.236909	0.589615	0.622964	0.174231	0.354373	-0.168367	0.322442	0.144308	0.0319575	0.110825	0.167541	0.0624586	-0.0104827	-0.013335	-0.224836	-0.0423274	-0.232523	0.214586	-0.271897	3.64407	0.000226948	0.200563	-0.296691	Q07954	Prolow-density lipoprotein receptor-related protein 1 OS=Homo sapiens OX=9606 GN=LRP1 PE=1 SV=2	>sp|Q07954|LRP1_HUMAN Prolow-density lipoprotein receptor-related protein 1 OS=Homo sapiens OX=9606 GN=LRP1 PE=1 SV=2	37	127	749
0.709471	-0.224982	0.724458	0.0716714	-0.300681	-0.745178	0.562594	-0.648259	-0.602105	0.412794	0.840441	0.128845	1.42907	-0.462847	0.814107	-0.633538	-1.63705	-0.963387	0.646789	-0.915258	0.621176	-0.063683	-0.410039	-0.599041	0.182925	0.155234	-0.76093	0.450147	-0.426777	-1.01433	0.557168	-0.939237	0.810713	0.829878	-0.38104	-1.13297	-1.09794	1.51693	0.184889	-0.134838	1.74877	0.0178334	0.200837	-0.556079	Q96PX8	SLIT and NTRK-like protein 1 OS=Homo sapiens OX=9606 GN=SLITRK1 PE=1 SV=2	>sp|Q96PX8|SLIK1_HUMAN SLIT and NTRK-like protein 1 OS=Homo sapiens OX=9606 GN=SLITRK1 PE=1 SV=2	28	16	158
-0.155798	-0.556396	0.247636	-0.00871893	0.258413	0.957635	0.450759	0.815997	0.292964	0.0107694	0.772763	-0.338111	-0.418013	-0.607467	0.440481	-0.0358222	1.36187	-0.10911	0.703272	0.365334	0.832372	0.446454	-0.0321454	-0.702658	0.334415	0.790418	0.464387	0.787531	0.28121	0.0451345	-0.275566	-0.444373	-0.17107	-0.0896288	0.0534359	0.677388	-0.245961	0.0505381	-0.0610466	0.0961215	2.26415	0.0054432	0.202385	0.405668	Q96GD0	Pyridoxal phosphate phosphatase OS=Homo sapiens OX=9606 GN=PDXP PE=1 SV=2	>sp|Q96GD0|PLPP_HUMAN Pyridoxal phosphate phosphatase OS=Homo sapiens OX=9606 GN=PDXP PE=1 SV=2	15	4	8
-0.498217	-0.0498935	-1.35119	0.151674	-0.176694	-0.0359769	-0.34118	-0.317557	0.657877	0.94759	0.0337315	-1.01732	0.333139	-0.808912	0.33003	0.15827	1.13477	1.11733	0.454212	0.651003	-0.488694	-0.315259	-0.0418385	-0.304545	-0.620511	-0.127717	0.94068	0.507663	0.134517	0.630939	-0.319408	-0.38402	0.632743	0.294313	1.11442	0.633975	0.54523	-0.861902	0.0778211	-0.756346	1.92084	0.0119994	0.202959	0.481882	E7ETH0	Complement factor I OS=Homo sapiens OX=9606 GN=CFI PE=1 SV=1	>tr|E7ETH0|E7ETH0_HUMAN Complement factor I OS=Homo sapiens OX=9606 GN=CFI PE=1 SV=1	50	23	519
0.404417	-0.208225	2.69992	1.22964	0.606496	-0.637418	1.12023	2.30614	-1.46909	-1.18714	-0.307407	1.4908	1.866	0.605296	0.565952	0.224836	-2.65619	-0.818714	0.478537	0.111089	1.11906	0.596118	0.291666	-0.0444577	0.613203	0.733882	-0.225419	1.1068	-0.721326	-1.1632	1.46818	-0.91201	1.40878	-0.227859	-1.28077	-2.1361	-1.5175	1.91431	0.409832	0.385575	1.4414	0.0361909	0.203403	-0.786283	P12272	Parathyroid hormone-related protein OS=Homo sapiens OX=9606 GN=PTHLH PE=1 SV=1	>sp|P12272|PTHR_HUMAN Parathyroid hormone-related protein OS=Homo sapiens OX=9606 GN=PTHLH PE=1 SV=1	18	3	9
0.527914	0.452856	0.660494	0.475025	0.305385	0.0634999	0.576732	-0.270669	-0.0458764	0.0405983	0.264219	0.461959	0.0885973	0.436027	0.318014	-0.0769558	-0.32916	-0.0448137	0.359179	-0.333542	0.499682	-0.202975	0.567526	0.560331	0.479384	0.706029	-0.375963	0.432462	0.0226368	-0.257228	0.486258	-0.0398372	0.357513	0.160283	-0.409299	-0.547428	-0.277064	0.23275	0.10487	-0.261656	2.85127	0.0014084	0.203855	-0.336548	Q12860	Contactin-1 OS=Homo sapiens OX=9606 GN=CNTN1 PE=1 SV=1	>sp|Q12860|CNTN1_HUMAN Contactin-1 OS=Homo sapiens OX=9606 GN=CNTN1 PE=1 SV=1	64	51	1855
0.584776	0.144648	0.95362	0.311586	-0.333605	-0.0361222	0.873157	-0.0200899	-0.42519	0.126539	0.727047	0.0822888	0.979058	-0.112819	0.543326	-0.373669	-0.829974	-0.637322	0.284467	-0.657669	0.288807	0.0766496	0.246479	0.284117	0.443408	0.402024	-0.464583	0.470658	-0.00702808	-0.456686	0.493174	-0.580153	0.321297	0.720838	0.0432087	-0.862359	-0.849613	0.997064	0.238847	-0.102783	2.11534	0.00766753	0.204305	-0.427404	Q8N3J6	Cell adhesion molecule 2 OS=Homo sapiens OX=9606 GN=CADM2 PE=2 SV=1	>sp|Q8N3J6|CADM2_HUMAN Cell adhesion molecule 2 OS=Homo sapiens OX=9606 GN=CADM2 PE=2 SV=1	43	16	168
-0.909753	0.849355	-1.12043	0.129421	0.394087	1.63755	0.271646	0.147288	0.644813	2.15985	0.073723	-0.20357	-0.514431	0.880718	-0.582245	2.40043	0.592432	0.693017	-0.988558	0.0360946	-1.6051	1.35899	-1.59778	0.136364	-1.67804	-2.35012	-0.420149	-0.292542	-0.243947	-0.308387	-1.85391	-0.233039	-1.34518	-0.10735	-0.420578	1.90324	0.558303	-0.965422	1.58778	-0.582455	1.46785	0.0340523	0.204554	0.741481	P01857	Immunoglobulin heavy constant gamma 1 OS=Homo sapiens OX=9606 GN=IGHG1 PE=1 SV=1	>sp|P01857|IGHG1_HUMAN Immunoglobulin heavy constant gamma 1 OS=Homo sapiens OX=9606 GN=IGHG1 PE=1 SV=1	75	27	4615
0.451628	0.458655	0.376959	0.224994	-0.164211	-0.224751	0.624571	-0.144198	-0.0527109	0.132972	0.93699	0.256589	1.02671	0.406524	0.89609	-0.498927	-1.09613	-0.289663	0.498704	-0.582255	0.799577	-0.449181	-0.188599	-0.148316	0.320019	0.212736	-0.302877	0.530432	-0.161176	-0.3898	0.84038	-0.914107	0.387469	0.626509	0.0598034	-0.98737	-0.811386	0.817125	0.139837	-0.0963595	2.03966	0.00912722	0.205009	-0.444285	P52799	Ephrin-B2 OS=Homo sapiens OX=9606 GN=EFNB2 PE=1 SV=1	>sp|P52799|EFNB2_HUMAN Ephrin-B2 OS=Homo sapiens OX=9606 GN=EFNB2 PE=1 SV=1	23	7	97
-4.37321	-6.90851	-5.79683	-7.10243	-6.6309	-2.95739	-6.14051	6.26585	-4.96908	-3.27727	-3.08607	-4.36542	-4.45142	-4.59058	-4.83584	-3.58902	-2.66143	-2.36261	4.47231	8.47013	-3.05798	4.98515	-5.13111	-3.26714	-1.34792	-5.76708	3.25457	-5.77594	4.5181	-3.17265	-3.06687	2.26195	0.738432	-2.14754	-3.34877	6.50514	-3.69369	-1.82216	-4.78088	-2.42727	1.12279	0.0753713	0.206169	2.28061	172	HBA_HUMAN	>gi|172| HBA_HUMAN	92	10	479
-0.170729	0.0737468	-0.546268	-0.405046	0.00625605	0.504469	-0.715936	0.0518581	0.546289	0.709307	0.69653	-1.01608	-0.327911	-1.37328	0.670711	0.321598	2.07204	1.04512	-0.670819	1.49208	NaN	NaN	NaN	NaN	NaN	NaN	NaN	NaN	NaN	NaN	NaN	NaN	NaN	NaN	NaN	NaN	NaN	NaN	NaN	NaN	1.42209	0.0378364	0.206761	0.774808	Q8NBZ7	UDP-glucuronic acid decarboxylase 1 OS=Homo sapiens OX=9606 GN=UXS1 PE=1 SV=1	>sp|Q8NBZ7|UXS1_HUMAN UDP-glucuronic acid decarboxylase 1 OS=Homo sapiens OX=9606 GN=UXS1 PE=1 SV=1	10	3	7
1.1057	0.240488	0.128306	0.289671	0.206671	-0.444298	0.0196387	-0.704619	0.304514	0.0357008	0.0445375	0.599305	0.147211	0.492508	0.386651	-0.511564	-0.0556409	-0.0428237	0.203649	0.0699983	0.185561	-0.655574	0.429486	0.188221	-0.432303	-0.0592368	-0.891279	0.164133	-0.594458	-0.224013	0.529676	0.0551931	0.103685	0.294776	0.225238	0.0893975	-0.116992	-0.263696	0.754146	-0.539578	2.44834	0.00356174	0.20786	-0.368601	Q9NZR2	Low-density lipoprotein receptor-related protein 1B OS=Homo sapiens OX=9606 GN=LRP1B PE=1 SV=2	>sp|Q9NZR2|LRP1B_HUMAN Low-density lipoprotein receptor-related protein 1B OS=Homo sapiens OX=9606 GN=LRP1B PE=1 SV=2	15	50	163
8.34257	4.15242	1.86106	0.0918187	-1.32784	-1.04181	-1.7896	1.17137	-1.59307	-1.07682	NaN	NaN	NaN	NaN	NaN	NaN	NaN	NaN	NaN	NaN	NaN	NaN	NaN	NaN	NaN	NaN	NaN	NaN	NaN	NaN	NaN	NaN	NaN	NaN	NaN	NaN	NaN	NaN	NaN	NaN	1.06884	0.0853421	0.208245	-3.48999	P06899	Histone H2B type 1-J OS=Homo sapiens OX=9606 GN=HIST1H2BJ PE=1 SV=3	>sp|P06899|H2B1J_HUMAN Histone H2B type 1-J OS=Homo sapiens OX=9606 GN=HIST1H2BJ PE=1 SV=3	32	4	33
0.106106	-1.22815	-2.1052	0.36908	-2.84233	-0.356801	0.620083	-1.72999	0.908724	0.778082	0.298205	-1.90965	-1.0847	-1.13622	-0.132645	0.337609	-0.00606271	1.9799	0.645345	1.6417	-1.78593	0.0114381	-1.40631	-0.785575	-0.0680818	-1.35381	0.422076	-0.96938	0.414831	1.44913	-1.42559	-0.0714514	-0.162062	2.20519	1.79721	1.6375	0.963239	-0.516022	-0.353137	-1.84008	1.40727	0.0391499	0.208405	0.801481	Q06033	Inter-alpha-trypsin inhibitor heavy chain H3 OS=Homo sapiens OX=9606 GN=ITIH3 PE=1 SV=2	>sp|Q06033|ITIH3_HUMAN Inter-alpha-trypsin inhibitor heavy chain H3 OS=Homo sapiens OX=9606 GN=ITIH3 PE=1 SV=2	35	22	168
0.597641	0.021878	0.952129	0.318499	-0.185644	-0.433004	0.67775	-0.185869	-0.410816	-0.209134	0.0521943	0.771497	0.444918	0.583213	0.475399	-0.366525	-0.935242	-0.722656	0.416462	-0.740415	0.625653	-0.202208	0.210393	0.307871	0.274202	0.53755	-0.0724451	0.391258	-0.222788	0.101831	0.435906	-0.622597	0.474422	0.182987	-0.0993733	-0.465782	-0.621921	0.663665	0.45047	-0.2601	2.19238	0.00642127	0.212539	-0.401334	Q8IWV2	Contactin-4 OS=Homo sapiens OX=9606 GN=CNTN4 PE=1 SV=1	>sp|Q8IWV2|CNTN4_HUMAN Contactin-4 OS=Homo sapiens OX=9606 GN=CNTN4 PE=1 SV=1	43	30	245
0.60732	0.173862	0.715103	0.667801	1.43142	-0.460824	0.0848302	-0.748274	0.784083	-0.0185801	0.549808	1.19795	1.97778	2.00557	0.942227	1.53228	0.510306	1.41905	0.850414	0.563695	0.100903	0.745097	1.22091	-0.109381	0.814495	-0.105182	0.490159	0.397651	0.0511465	-0.723929	0.374511	1.2452	0.688001	-0.314277	0.390016	-1.03389	0.0955529	-0.360168	0.0106813	1.54384	1.71962	0.0190711	0.212545	-0.527073	O95467	Neuroendocrine secretory protein 55 OS=Homo sapiens OX=9606 GN=GNAS PE=2 SV=1	>sp|O95467|GNAS3_HUMAN Neuroendocrine secretory protein 55 OS=Homo sapiens OX=9606 GN=GNAS PE=2 SV=1	8	1	7
NaN	NaN	NaN	NaN	NaN	NaN	NaN	NaN	NaN	NaN	-1.88128	0.034617	-1.22816	0.0699571	-0.568702	1.6889	-0.36734	1.02122	-0.369665	0.427574	NaN	NaN	NaN	NaN	NaN	NaN	NaN	NaN	NaN	NaN	NaN	NaN	NaN	NaN	NaN	NaN	NaN	NaN	NaN	NaN	1.2142	0.0610663	0.213214	1.19485	P16562	Cysteine-rich secretory protein 2 OS=Homo sapiens OX=9606 GN=CRISP2 PE=1 SV=1	>sp|P16562|CRIS2_HUMAN Cysteine-rich secretory protein 2 OS=Homo sapiens OX=9606 GN=CRISP2 PE=1 SV=1	12	2	3
-0.17645	0.377254	0.292278	-0.323965	-0.058292	1.06878	-0.519362	0.165627	0.341754	0.0466247	0.237603	-0.0249948	-0.146	0.0331205	-0.378673	-0.321901	-0.151789	-0.32119	-0.695941	-0.346287	0.669706	0.349241	2.09031	0.402358	1.78	0.52001	-0.338731	0.0848885	-0.219032	-0.682545	1.16599	0.396646	1.31282	0.866325	0.861496	0.455012	0.0661468	-0.128732	0.172232	0.944427	1.8379	0.0145244	0.213458	-0.479339	Q9GZV7	Hyaluronan and proteoglycan link protein 2 OS=Homo sapiens OX=9606 GN=HAPLN2 PE=2 SV=1	>sp|Q9GZV7|HPLN2_HUMAN Hyaluronan and proteoglycan link protein 2 OS=Homo sapiens OX=9606 GN=HAPLN2 PE=2 SV=1	19	5	13
0.765277	-0.00738196	0.443839	0.648725	1.19803	-1.03201	-0.352047	0.183883	0.476802	-0.456334	-0.0349988	0.81112	-0.050877	0.894697	0.249926	0.395542	0.367684	0.783914	-0.224926	0.536008	0.910021	-0.642842	0.786083	0.388026	-0.22557	-0.441459	-0.931979	0.196815	-0.401309	-0.341238	0.674146	1.27947	0.175635	-0.546629	0.0867783	-0.493534	0.264226	-1.15116	0.578361	0.533935	1.89684	0.0126812	0.213853	-0.465614	P42785	Lysosomal Pro-X carboxypeptidase OS=Homo sapiens OX=9606 GN=PRCP PE=1 SV=1	>sp|P42785|PCP_HUMAN Lysosomal Pro-X carboxypeptidase OS=Homo sapiens OX=9606 GN=PRCP PE=1 SV=1	33	13	122
-0.33114	0.398912	-1.9434	-0.342271	0.493538	0.0667637	-1.17006	-1.27589	0.976335	1.10906	-0.01383	-2.14096	-0.766159	-1.09369	0.869556	0.983716	1.01522	2.70602	0.359039	0.646089	-1.43356	-0.605544	-0.774058	0.383844	-1.04784	-1.10166	0.259499	-0.265402	0.389198	0.373191	-1.78698	-0.984917	-0.317555	0.992131	0.586633	2.03217	-0.0298219	-1.76152	1.32238	-1.75324	1.43343	0.0368616	0.213906	0.736918	P19652	Alpha-1-acid glycoprotein 2 OS=Homo sapiens OX=9606 GN=ORM2 PE=1 SV=2	>sp|P19652|A1AG2_HUMAN Alpha-1-acid glycoprotein 2 OS=Homo sapiens OX=9606 GN=ORM2 PE=1 SV=2	59	14	1144
-1.0409	0.566365	-0.318449	0.245769	-0.430431	0.384107	-0.991643	0.100535	-0.275097	-0.507119	-0.636837	-0.149363	-0.208054	-0.12855	-1.07317	-0.217788	0.421288	0.0743074	-0.613759	0.907889	-0.390054	-0.250645	-0.951345	-0.351618	-0.484255	-0.334563	1.44015	1.13266	-0.0885275	0.625393	-0.078328	0.606087	-0.201823	-0.398215	-0.199067	-0.340279	0.223341	-0.106534	0.587319	0.780526	1.93216	0.0116908	0.214638	0.453755	P05121	Plasminogen activator inhibitor 1 OS=Homo sapiens OX=9606 GN=SERPINE1 PE=1 SV=1	>sp|P05121|PAI1_HUMAN Plasminogen activator inhibitor 1 OS=Homo sapiens OX=9606 GN=SERPINE1 PE=1 SV=1	25	8	19
-0.197497	-0.0689928	-0.342311	0.272515	-0.687937	0.137359	-0.0247057	0.461301	0.257833	-0.59117	-0.121512	-0.294266	-0.479314	0.0240799	-0.236406	-0.111415	-0.149795	0.220477	-0.14921	0.51387	-0.510178	-0.495794	0.0163299	-0.671931	0.0491764	-0.102383	0.612952	0.171379	1.28138	0.261782	0.0858385	-0.84904	0.19665	0.292319	-0.0298735	0.0127696	-0.147887	0.520799	0.156695	-0.188578	2.44624	0.00357895	0.215207	0.35958	P15259	Phosphoglycerate mutase 2 OS=Homo sapiens OX=9606 GN=PGAM2 PE=1 SV=3	>sp|P15259|PGAM2_HUMAN Phosphoglycerate mutase 2 OS=Homo sapiens OX=9606 GN=PGAM2 PE=1 SV=3	34	7	54
0.140677	0.293828	-0.326253	-0.287574	0.840658	-0.764305	-0.382392	-1.0863	-0.453291	0.596518	0.546018	-0.108553	-0.0833733	0.120424	0.17107	-0.699171	-0.123948	-0.461118	-0.0413464	-0.393437	0.211622	0.0785462	0.359131	0.583983	0.00467025	0.186823	-0.637982	-0.0252949	-0.252026	-0.0553479	0.0319625	-0.411999	-0.0967346	-0.0162783	-0.174294	0.0822759	0.151946	-0.589381	0.170044	-0.505729	2.45049	0.0035441	0.21595	-0.358049	O43909	Exostosin-like 3 OS=Homo sapiens OX=9606 GN=EXTL3 PE=1 SV=1	>sp|O43909|EXTL3_HUMAN Exostosin-like 3 OS=Homo sapiens OX=9606 GN=EXTL3 PE=1 SV=1	14	10	22
-0.0132558	-0.158039	-0.44783	-0.62362	-0.549842	0.0742028	-0.791916	1.66272	-0.73963	-0.629906	-0.328468	-0.298672	-0.711699	-0.991137	-0.618857	0.452972	-0.397389	0.809875	-0.448769	1.65021	-0.250785	0.120361	0.294361	-0.0745336	-0.388547	0.52448	0.517484	0.0992766	0.568895	-0.0364048	-0.153155	0.815519	0.160562	-0.124951	0.0597969	1.03809	0.304482	-0.0600344	-0.087834	0.536895	1.85171	0.0140699	0.217112	0.466524	P53004	Biliverdin reductase A OS=Homo sapiens OX=9606 GN=BLVRA PE=1 SV=2	>sp|P53004|BIEA_HUMAN Biliverdin reductase A OS=Homo sapiens OX=9606 GN=BLVRA PE=1 SV=2	7	2	8
-0.0485902	1.2443	-0.0762395	0.615433	-0.0826006	-0.390865	0.914845	-0.0292772	-1.39831	1.03952	NaN	NaN	NaN	NaN	NaN	NaN	NaN	NaN	NaN	NaN	0.157999	1.23549	0.840495	3.67453	-0.294951	0.030224	-0.641756	-1.59174	-0.876648	-0.845197	2.41155	1.04602	0.307819	-0.463007	-1.26704	-1.47643	0.0474289	2.29296	-1.50538	0.50287	1.31789	0.0480957	0.217383	-0.881932	Q92956	Tumor necrosis factor receptor superfamily member 14 OS=Homo sapiens OX=9606 GN=TNFRSF14 PE=1 SV=3	>sp|Q92956|TNR14_HUMAN Tumor necrosis factor receptor superfamily member 14 OS=Homo sapiens OX=9606 GN=TNFRSF14 PE=1 SV=3	5	1	4
0.498801	0.50645	0.199793	-0.341591	-0.884765	0.374927	0.628887	0.625951	-0.651224	0.0457052	NaN	NaN	NaN	NaN	NaN	NaN	NaN	NaN	NaN	NaN	-0.444158	-0.896666	-1.07614	-0.59326	-0.703572	0.0806345	0.0625289	-0.772904	0.869843	2.19984	NaN	NaN	NaN	NaN	NaN	NaN	NaN	NaN	NaN	NaN	1.40865	0.0390259	0.217721	0.719929	P51148	Ras-related protein Rab-5C OS=Homo sapiens OX=9606 GN=RAB5C PE=1 SV=2	>sp|P51148|RAB5C_HUMAN Ras-related protein Rab-5C OS=Homo sapiens OX=9606 GN=RAB5C PE=1 SV=2	12	2	3
NaN	NaN	NaN	NaN	NaN	NaN	NaN	NaN	NaN	NaN	NaN	NaN	NaN	NaN	NaN	NaN	NaN	NaN	NaN	NaN	1.14642	1.16046	-1.16617	-0.717384	0.816721	1.02963	-0.805069	-0.615051	-1.38942	0.151246	0.385214	0.0939284	1.15346	2.77488	0.391196	0.0931278	-0.51813	-0.485066	0.887236	-1.52799	1.28913	0.0513892	0.217745	-0.921821	M9MML6	Low affinity immunoglobulin gamma Fc region receptor III-B OS=Homo sapiens OX=9606 GN=FCGR3B PE=1 SV=1	>tr|M9MML6|M9MML6_HUMAN Low affinity immunoglobulin gamma Fc region receptor III-B OS=Homo sapiens OX=9606 GN=FCGR3B PE=1 SV=1	16	5	38
-0.531488	-0.751135	-1.69819	-1.89336	-0.0939252	-0.344646	-1.75434	-0.856028	1.79411	-2.9785	2.65458	-1.49427	2.14054	-0.106943	-0.577782	-0.477298	-0.451981	-0.775602	-0.775845	-1.24427	1.66888	3.46591	-0.392099	0.602788	-0.101569	1.15392	-0.772271	-0.853591	1.00168	-0.766563	4.14383	0.219872	1.569	-1.35413	0.439112	-0.804268	-0.622987	1.43175	-2.86248	-0.069529	1.29036	0.0512431	0.218126	-0.946919	Q9Y6R7	IgGFc-binding protein OS=Homo sapiens OX=9606 GN=FCGBP PE=1 SV=3	>sp|Q9Y6R7|FCGBP_HUMAN IgGFc-binding protein OS=Homo sapiens OX=9606 GN=FCGBP PE=1 SV=3	36	95	1109
0.460489	-0.802842	-1.38609	-1.73876	-1.15672	-1.98687	-0.531979	-0.759581	0.95299	0.232233	-1.89717	-1.7319	-2.15696	-1.08922	-1.84038	-2.63135	-0.193759	-1.38857	-0.472726	-0.6271	-1.13339	-1.44989	-0.456405	-1.81305	-0.727237	-1.11226	0.861689	-1.69407	-0.148305	2.53549	NaN	NaN	NaN	NaN	NaN	NaN	NaN	NaN	NaN	NaN	1.36085	0.0435662	0.218281	0.797024	Q15485	Ficolin-2 OS=Homo sapiens OX=9606 GN=FCN2 PE=1 SV=2	>sp|Q15485|FCN2_HUMAN Ficolin-2 OS=Homo sapiens OX=9606 GN=FCN2 PE=1 SV=2	17	4	7
0.621684	0.194966	0.677732	0.13798	-0.258678	-0.126398	0.799117	-0.0398844	-0.907862	0.801529	0.471791	0.800163	1.87144	0.77938	1.4124	-0.470181	-1.25092	-0.487678	0.629561	-0.540986	0.379728	-0.446953	-0.117466	-0.5667	0.360537	0.26756	-0.770583	-0.028312	-0.719556	-1.15368	-0.138252	-0.381918	0.438039	0.107511	-0.37985	-0.825371	-0.580535	0.866127	0.667725	-0.300374	1.72027	0.0190429	0.21938	-0.506712	B7ZKJ3	EPH receptor A5, isoform CRA_b OS=Homo sapiens OX=9606 GN=EPHA5 PE=1 SV=1	>tr|B7ZKJ3|B7ZKJ3_HUMAN EPH receptor A5, isoform CRA_b OS=Homo sapiens OX=9606 GN=EPHA5 PE=1 SV=1	14	9	102
-1.78711	1.9721	0.134197	-1.40823	1.47201	0.379383	-1.44527	-0.14059	0.337146	0.504528	-1.83458	-1.13766	-1.73813	-2.05091	-1.00409	0.060032	0.602165	-1.71747	1.43503	0.886096	-1.08118	0.90411	-1.10278	-0.605577	-0.959611	0.164104	1.02346	-0.803702	-0.403541	2.10268	-1.31557	-1.85095	-1.57134	0.453005	1.19545	0.227947	-0.287251	-0.702981	-1.27152	0.570244	1.39073	0.0406699	0.220764	0.741866	P11226	Mannose-binding protein C OS=Homo sapiens OX=9606 GN=MBL2 PE=1 SV=2	>sp|P11226|MBL2_HUMAN Mannose-binding protein C OS=Homo sapiens OX=9606 GN=MBL2 PE=1 SV=2	35	8	29
1.48806	0.14839	0.302415	0.0299817	-0.266832	-1.27448	0.44114	-1.401	0.11392	-0.644899	-0.136158	0.398676	-0.161495	0.653088	-0.12561	-0.414711	-0.843639	0.257127	0.64158	-0.522176	0.846379	-1.04668	0.792734	1.09932	-0.0673052	0.0652474	-1.10509	0.673596	-0.196875	0.214799	0.931856	1.20586	0.473878	-0.524154	0.0120938	-0.621324	-0.320747	-0.3181	1.26672	-0.14297	1.7031	0.0198108	0.221296	-0.509319	O60242	Adhesion G protein-coupled receptor B3 OS=Homo sapiens OX=9606 GN=ADGRB3 PE=1 SV=2	>sp|O60242|AGRB3_HUMAN Adhesion G protein-coupled receptor B3 OS=Homo sapiens OX=9606 GN=ADGRB3 PE=1 SV=2	7	10	55
-4.70637	-6.57694	-5.89712	-7.45252	-6.9338	-2.77345	-5.71003	5.11165	-0.00663745	-4.29726	-3.25463	-5.2142	-5.07882	-5.59571	-4.90172	-4.68031	-2.97945	-3.44415	2.19242	7.17311	-2.25282	3.97847	-5.86941	-3.83383	-2.10195	-7.02362	2.83768	-6.7343	4.81926	-3.63537	-3.27264	1.43149	0.433389	-0.0657858	-3.75079	6.24652	-4.18659	-2.22335	-5.73913	-2.71208	1.0796	0.0832528	0.222661	2.15753	158	CAH1_HUMAN	>gi|158| CAH1_HUMAN	43	9	99
-4.21635	-6.78825	-5.60635	-7.17608	-6.56541	-2.87874	-6.15726	6.33806	-5.41825	-3.23297	-3.54236	-5.01755	-5.35195	-5.17278	-5.48227	-5.05933	-3.5265	-4.20684	3.09183	6.97205	-3.01703	4.44074	-4.47869	-2.30086	-1.54274	-4.36131	2.54561	-4.66465	3.95793	-2.82758	-3.25693	1.93961	0.218029	-2.5699	-3.90947	6.05039	-4.26339	-1.78146	-5.24965	-2.65445	1.07954	0.0832648	0.224369	2.1035	173	HBB_HUMAN	>gi|173| HBB_HUMAN	96	15	697
0.146711	0.632985	0.373878	0.503373	-0.597349	-0.81744	0.496276	0.0941232	0.117115	-0.105955	0.596372	-0.269397	0.256995	0.0296703	0.45541	-0.289619	-0.0815963	-0.594317	0.309356	-0.350554	0.261729	0.0044863	0.345241	0.156746	0.197043	0.227461	-0.612149	0.563152	-0.452412	-0.192852	0.895679	0.0372161	0.52388	1.13348	0.286291	0.245323	-0.366682	0.486147	0.269084	-0.326113	2.26695	0.00540812	0.225568	-0.367605	Q13555	Calcium/calmodulin-dependent protein kinase type II subunit gamma OS=Homo sapiens OX=9606 GN=CAMK2G PE=1 SV=4	>sp|Q13555|KCC2G_HUMAN Calcium/calmodulin-dependent protein kinase type II subunit gamma OS=Homo sapiens OX=9606 GN=CAMK2G PE=1 SV=4	18	7	70
-0.549271	-0.401409	-0.678582	-0.600066	0.0209232	0.514926	0.148541	0.373505	0.434746	0.0429067	0.32735	-0.592107	0.469357	-0.135197	0.472851	0.0646044	0.902659	-0.474331	0.362309	-0.0343767	-0.26614	0.000387661	-0.468238	-0.514618	0.343025	0.560394	1.26129	0.130267	-0.0253708	-0.192739	-0.0473838	-0.432943	-0.0472622	0.561179	0.0933441	0.493162	0.497913	0.316615	-0.432432	0.105713	2.20573	0.00622684	0.225984	0.374755	Q9NPY3	Complement component C1q receptor OS=Homo sapiens OX=9606 GN=CD93 PE=1 SV=3	>sp|Q9NPY3|C1QR1_HUMAN Complement component C1q receptor OS=Homo sapiens OX=9606 GN=CD93 PE=1 SV=3	17	8	46
0.261548	0.485624	0.642122	0.357612	-0.196887	0.708616	0.88824	-0.0329434	-0.43374	0.142342	0.783938	0.448772	0.370719	0.412812	0.848145	-0.299361	-0.680935	-0.685808	0.236124	-0.526962	0.286854	0.28664	0.332051	0.601647	1.17928	0.564466	-0.104592	0.411319	0.60116	-0.475241	0.956874	-0.848667	0.677557	0.541313	0.115699	-0.444815	-0.40612	0.755978	0.114955	0.0858856	2.02375	0.00946789	0.226789	-0.406254	O75071	EF-hand calcium-binding domain-containing protein 14 OS=Homo sapiens OX=9606 GN=EFCAB14 PE=1 SV=1	>sp|O75071|EFC14_HUMAN EF-hand calcium-binding domain-containing protein 14 OS=Homo sapiens OX=9606 GN=EFCAB14 PE=1 SV=1	17	7	55
-4.10651	-6.49074	-6.28272	-7.64481	-7.11927	-2.90622	-6.21249	6.65906	-4.78644	-3.11454	-2.65308	-4.67752	-4.50336	-4.56401	-4.66913	-3.97142	-2.2772	-3.21141	3.09205	7.17148	-2.18951	3.904	-2.9751	-2.51747	-1.29429	-3.93371	2.91562	-3.8109	3.34619	-2.25929	-3.15948	2.33949	0.972732	-2.21949	-3.69263	6.48204	-4.7948	-2.00711	-5.94013	-2.45102	1.06676	0.0857508	0.227891	2.07663	P02042	Hemoglobin subunit delta OS=Homo sapiens OX=9606 GN=HBD PE=1 SV=2	>sp|P02042|HBD_HUMAN Hemoglobin subunit delta OS=Homo sapiens OX=9606 GN=HBD PE=1 SV=2	90	13	310
0.0812435	-0.281815	0.179494	0.0355336	-0.278482	-0.0449852	-0.205279	1.2645	0.304908	-0.288119	-0.671607	-0.130977	-0.396735	-0.558357	0.829333	0.0967339	-0.139062	0.126559	0.190327	1.44173	-0.591648	-0.0347989	-0.832505	-0.360512	-0.30326	-0.353279	0.364737	0.388778	1.04998	-0.194823	0.384027	-0.317142	0.596307	0.407837	-0.149715	0.709976	-0.0936075	0.669119	0.545635	-0.0462286	1.98986	0.0102363	0.227922	0.409069	Q32Q12	Nucleoside diphosphate kinase OS=Homo sapiens OX=9606 GN=NME1-NME2 PE=1 SV=1	>tr|Q32Q12|Q32Q12_HUMAN Nucleoside diphosphate kinase OS=Homo sapiens OX=9606 GN=NME1-NME2 PE=1 SV=1	44	8	42
-0.776905	-0.0140945	-0.663079	-0.583242	-0.782894	0.44721	-0.772446	0.0460394	-0.220531	0.195167	-0.13538	-0.187153	-0.345492	-0.199256	-0.0105821	0.673397	0.977615	0.508613	-0.953267	0.746809	-0.792527	-0.38001	-0.183602	0.567092	-0.418425	0.224256	1.08282	0.117695	0.229552	0.190284	0.0573361	0.809222	0.0195177	0.554979	-0.0281461	0.568151	0.332901	-0.0379885	0.395852	-0.0754119	1.98373	0.0103817	0.228078	0.408468	P07307	Asialoglycoprotein receptor 2 OS=Homo sapiens OX=9606 GN=ASGR2 PE=1 SV=2	>sp|P07307|ASGR2_HUMAN Asialoglycoprotein receptor 2 OS=Homo sapiens OX=9606 GN=ASGR2 PE=1 SV=2	21	4	14
1.10829	0.191536	0.552069	0.241334	-0.087496	-0.153497	0.314716	-0.349623	-0.0927058	0.0585297	0.0990125	-0.0447116	0.483915	-0.183039	0.327936	-0.606425	-0.378873	-0.591386	0.524235	-0.884782	0.227477	-0.410513	0.192874	-0.0310648	-0.156114	0.102463	-0.63642	0.39428	-0.651592	0.111293	0.550581	0.510261	0.0983909	0.11663	-0.0644273	-0.461875	-0.397277	0.0983872	0.549465	-0.462235	2.28124	0.00523305	0.228553	-0.361813	Q9UIW2	Plexin-A1 OS=Homo sapiens OX=9606 GN=PLXNA1 PE=1 SV=3	>sp|Q9UIW2|PLXA1_HUMAN Plexin-A1 OS=Homo sapiens OX=9606 GN=PLXNA1 PE=1 SV=3	13	19	79
0.663011	0.0270454	0.534448	0.511021	-0.183361	-0.394074	0.279871	-0.47657	-0.288977	-0.221672	-0.440216	0.577135	0.554129	0.705253	0.149109	-0.212928	-1.11491	-0.112465	0.606515	-0.236618	0.66978	-0.0833081	0.73147	0.927772	0.488496	0.633796	-0.142081	0.597669	0.166605	0.059401	0.74927	0.237642	0.557914	-0.51252	-0.0825578	-0.741342	-0.295242	-0.0679202	0.583517	0.323222	2.08035	0.00831099	0.228598	-0.391787	Q6P9A2	Polypeptide N-acetylgalactosaminyltransferase 18 OS=Homo sapiens OX=9606 GN=GALNT18 PE=2 SV=2	>sp|Q6P9A2|GLT18_HUMAN Polypeptide N-acetylgalactosaminyltransferase 18 OS=Homo sapiens OX=9606 GN=GALNT18 PE=2 SV=2	29	15	84
0.130808	-0.00555871	0.455485	0.668174	-0.366839	0.310933	0.484978	-0.445598	0.241336	-0.453505	1.2299	0.421103	1.24912	0.522333	0.369711	-0.343817	0.0330168	-0.660633	0.0849579	-0.599962	0.682472	0.479953	0.522011	-0.0109603	0.261874	0.211023	0.0901024	0.131272	0.214331	-0.246105	-0.111343	-0.332656	-0.782714	0.65684	0.346184	0.0740939	0.787256	-0.820366	0.222467	-1.21288	1.93275	0.0116748	0.232123	-0.41415	O60939	Sodium channel subunit beta-2 OS=Homo sapiens OX=9606 GN=SCN2B PE=1 SV=1	>sp|O60939|SCN2B_HUMAN Sodium channel subunit beta-2 OS=Homo sapiens OX=9606 GN=SCN2B PE=1 SV=1	29	6	15
NaN	NaN	NaN	NaN	NaN	NaN	NaN	NaN	NaN	NaN	0.774315	0.139275	-0.364165	-0.421674	0.128484	0.942266	0.519123	0.135661	0.51076	1.5738	0.636818	0.356239	0.481073	-0.18476	0.0343016	0.306959	1.06455	0.224038	1.15346	0.114586	-0.860859	-0.179869	-0.0519884	0.16336	0.156481	1.33436	0.222219	0.225871	-0.645741	0.132052	1.73561	0.018382	0.232541	0.467129	P15374	Ubiquitin carboxyl-terminal hydrolase isozyme L3 OS=Homo sapiens OX=9606 GN=UCHL3 PE=1 SV=1	>sp|P15374|UCHL3_HUMAN Ubiquitin carboxyl-terminal hydrolase isozyme L3 OS=Homo sapiens OX=9606 GN=UCHL3 PE=1 SV=1	7	1	4
NaN	NaN	NaN	NaN	NaN	NaN	NaN	NaN	NaN	NaN	NaN	NaN	NaN	NaN	NaN	NaN	NaN	NaN	NaN	NaN	-0.424442	-0.184561	-0.791927	0.0562624	-0.168116	-0.167377	0.168525	-0.552725	0.378006	-0.134291	-0.811896	-0.97623	-0.826885	0.0625965	-0.658914	0.861438	0.379102	-1.26399	0.283773	0.954815	1.49311	0.0321288	0.233225	0.563138	P20336	Ras-related protein Rab-3A OS=Homo sapiens OX=9606 GN=RAB3A PE=1 SV=1	>sp|P20336|RAB3A_HUMAN Ras-related protein Rab-3A OS=Homo sapiens OX=9606 GN=RAB3A PE=1 SV=1	16	3	18
0.0683197	0.99551	-0.16693	0.882016	0.473174	-0.155969	-0.247062	0.770493	1.17209	0.703824	-1.18497	0.107921	-0.335188	0.0594985	-0.344501	3.33583	0.33501	-0.216748	0.0498569	0.311159	-0.752861	-0.460133	-0.139682	-0.506471	-0.682823	-0.0390706	0.0881715	-0.107231	0.180819	-0.360187	-0.84249	-1.08426	-0.372679	-1.26652	-0.594133	-0.210088	0.0829778	-0.830989	0.0859442	-0.243198	1.57057	0.0268802	0.233364	0.542642	Q9Y2S2	Lambda-crystallin homolog OS=Homo sapiens OX=9606 GN=CRYL1 PE=1 SV=3	>sp|Q9Y2S2|CRYL1_HUMAN Lambda-crystallin homolog OS=Homo sapiens OX=9606 GN=CRYL1 PE=1 SV=3	10	3	5
0.110329	0.715628	-1.06524	-0.89815	-1.15243	0.344709	-0.446109	1.60713	-0.719166	-0.746591	0.723699	-1.26259	-0.0620887	-0.920516	-0.691277	-0.313442	-0.263281	-0.284351	0.338187	1.53587	-0.663873	0.503229	-0.965694	-0.88459	-0.390727	-0.338683	1.55645	-0.0743501	1.27862	-0.807217	0.278453	0.00370645	-0.0554968	-0.211353	-0.952685	0.992734	-0.527599	0.644873	-0.765254	-0.103323	1.54716	0.0283687	0.233529	0.537544	A0A0C4DGB5	Calpastatin OS=Homo sapiens OX=9606 GN=CAST PE=1 SV=1	>tr|A0A0C4DGB5|A0A0C4DGB5_HUMAN Calpastatin OS=Homo sapiens OX=9606 GN=CAST PE=1 SV=1	17	9	17
0.671464	0.0038785	0.886838	0.36083	-0.181651	0.0871722	0.732131	0.503638	-0.323996	0.217558	0.0130667	0.193837	0.832236	0.363736	0.537536	-0.050738	-1.17847	-0.82512	0.749056	-0.528966	0.557075	0.191257	0.24311	0.588756	0.741255	0.497293	-0.706695	0.658309	0.072709	-0.511735	1.08978	-0.239014	1.12384	-0.0856135	-0.22539	-0.71357	-0.321319	0.876182	0.0205933	-0.0685691	1.87459	0.0133478	0.233734	-0.424068	P19021	Peptidyl-glycine alpha-amidating monooxygenase OS=Homo sapiens OX=9606 GN=PAM PE=1 SV=2	>sp|P19021|AMD_HUMAN Peptidyl-glycine alpha-amidating monooxygenase OS=Homo sapiens OX=9606 GN=PAM PE=1 SV=2	55	45	720
0.855516	0.790842	0.611895	-0.0312287	-0.676844	-0.130905	0.612286	0.175957	-0.345372	0.0388304	1.39617	-0.854753	1.85339	-0.231665	0.876679	-0.939236	-1.60532	-1.8778	0.836297	-0.548529	0.691808	0.213971	-0.305277	-0.0858777	0.14051	0.363667	-0.354087	0.70918	-0.61231	-0.860418	0.787269	-0.90781	0.772976	0.963286	-0.0320389	-0.856595	-0.943253	1.75668	0.366916	-0.338079	1.49872	0.0317158	0.233807	-0.569045	P55290	Cadherin-13 OS=Homo sapiens OX=9606 GN=CDH13 PE=1 SV=1	>sp|P55290|CAD13_HUMAN Cadherin-13 OS=Homo sapiens OX=9606 GN=CDH13 PE=1 SV=1	29	20	303
0.74313	0.658908	0.384581	0.444507	-0.039263	-0.192351	0.764598	-0.541481	0.25675	-0.0994635	1.20113	0.568353	-0.239545	0.642198	0.0219541	-0.530611	-0.921791	-0.508292	0.431788	-0.510375	0.548796	-0.33107	0.00289776	0.227797	0.192209	-0.0762866	-0.291884	0.395278	0.255109	-0.0649799	0.530775	-0.313485	0.293776	0.380115	0.278493	-0.496116	-0.283171	0.550022	0.647154	-0.134451	2.08529	0.008217	0.234418	-0.37734	P26992	Ciliary neurotrophic factor receptor subunit alpha OS=Homo sapiens OX=9606 GN=CNTFR PE=1 SV=2	>sp|P26992|CNTFR_HUMAN Ciliary neurotrophic factor receptor subunit alpha OS=Homo sapiens OX=9606 GN=CNTFR PE=1 SV=2	29	8	101
0.0530934	1.09833	0.0736039	0.37513	-0.137766	-0.684752	-0.0873874	-0.235665	-0.252702	0.448837	0.724322	0.00483175	0.632225	0.418589	0.59448	-0.154227	-0.407477	0.208626	0.10871	0.0265295	0.027461	-0.577958	0.0631169	0.0281964	-0.0693672	0.0953531	-0.549284	-0.0466825	-0.308795	-0.24251	0.288671	-0.369597	0.299402	0.658775	0.193394	-0.365129	-0.388796	0.296786	0.164727	-0.0234096	2.4088	0.00390118	0.234483	-0.338809	P05026	Sodium/potassium-transporting ATPase subunit beta-1 OS=Homo sapiens OX=9606 GN=ATP1B1 PE=1 SV=1	>sp|P05026|AT1B1_HUMAN Sodium/potassium-transporting ATPase subunit beta-1 OS=Homo sapiens OX=9606 GN=ATP1B1 PE=1 SV=1	36	8	36
-0.527095	0.55388	0.431559	0.447327	-0.169022	-0.137566	0.824671	-0.587973	-0.088611	0.00733759	0.66683	0.809245	0.27824	0.770778	0.504505	-0.24547	-0.798427	-0.465013	0.846993	-0.500659	0.488572	-0.482681	0.506235	0.563564	0.502228	0.396247	-0.331737	0.555039	0.0182822	-0.102857	0.760363	-0.154271	0.558011	0.650738	0.351509	-0.334683	-0.356879	0.480732	0.632759	0.0346451	2.04703	0.00897373	0.234498	-0.383184	P40189	Interleukin-6 receptor subunit beta OS=Homo sapiens OX=9606 GN=IL6ST PE=1 SV=2	>sp|P40189|IL6RB_HUMAN Interleukin-6 receptor subunit beta OS=Homo sapiens OX=9606 GN=IL6ST PE=1 SV=2	36	26	331
1.27971	0.503265	0.405112	0.424681	0.234373	-0.35389	0.81409	-0.453236	0.0144096	-0.144776	0.341743	0.791025	0.140836	0.989957	0.189382	0.0191979	-0.813875	0.466333	0.63096	-0.119629	0.673394	-0.555812	0.69427	0.721701	-0.0305127	0.442368	-1.27196	0.866066	-0.580147	0.110388	1.23757	0.293233	0.53846	0.112355	0.974508	-0.952084	0.125622	-0.078188	1.7763	0.263751	1.75017	0.0177757	0.23458	-0.459877	Q96GW7	Brevican core protein OS=Homo sapiens OX=9606 GN=BCAN PE=1 SV=2	>sp|Q96GW7|PGCB_HUMAN Brevican core protein OS=Homo sapiens OX=9606 GN=BCAN PE=1 SV=2	51	33	685
1.03225	0.237901	0.564817	0.0950443	-0.280786	-0.653875	0.687201	-0.640537	-0.120264	0.186808	0.194579	0.961944	0.928836	0.658486	1.20194	-0.188805	-1.86868	-0.0343247	1.52247	-0.54548	1.02913	-0.778346	0.213266	0.276933	0.289097	0.269336	-0.891161	0.652612	-0.214444	-0.239799	0.683811	0.594996	0.539625	-0.220438	-0.477953	-1.26764	-0.795779	0.277291	1.23281	0.192357	1.61021	0.0245352	0.234966	-0.509252	Q86UN2	Reticulon-4 receptor-like 1 OS=Homo sapiens OX=9606 GN=RTN4RL1 PE=1 SV=1	>sp|Q86UN2|R4RL1_HUMAN Reticulon-4 receptor-like 1 OS=Homo sapiens OX=9606 GN=RTN4RL1 PE=1 SV=1	17	7	32
NaN	NaN	NaN	NaN	NaN	NaN	NaN	NaN	NaN	NaN	NaN	NaN	NaN	NaN	NaN	NaN	NaN	NaN	NaN	NaN	-1.14136	-0.241392	-1.87511	-1.249	-1.24041	-1.10047	2.23617	-1.87712	0.0883755	-1.27128	-0.749381	0.0572339	-0.943745	-0.61389	0.235507	1.09007	0.811904	2.59656	0.305038	-0.546371	1.1908	0.0644463	0.235592	1.00944	P05386	60S acidic ribosomal protein P1 OS=Homo sapiens OX=9606 GN=RPLP1 PE=1 SV=1	>sp|P05386|RLA1_HUMAN 60S acidic ribosomal protein P1 OS=Homo sapiens OX=9606 GN=RPLP1 PE=1 SV=1	14	1	3
0.155212	0.293097	-0.234829	0.0752643	0.63899	-0.263796	0.78273	-0.481444	-0.0955809	-0.877587	1.12366	0.592671	0.651054	-0.161906	-0.263441	-0.40254	0.472031	0.15269	0.245951	-0.462648	1.28458	-0.172165	0.313533	1.93174	0.575356	0.583376	-0.62179	-0.33729	-0.656494	-0.00919342	-0.586639	0.433765	-0.568034	0.0714934	-0.319509	-0.395778	0.190904	0.0251215	0.0914681	-1.13046	1.76759	0.017077	0.235727	-0.451211	Q92673	Sortilin-related receptor OS=Homo sapiens OX=9606 GN=SORL1 PE=1 SV=2	>sp|Q92673|SORL_HUMAN Sortilin-related receptor OS=Homo sapiens OX=9606 GN=SORL1 PE=1 SV=2	40	65	385
0.458503	-0.422296	0.608856	0.492582	0.479882	-0.871727	0.467573	-0.316054	-0.0588617	-0.363043	-0.465902	1.09045	0.16859	0.597827	0.496843	-0.21994	-0.665051	-0.0728436	0.140761	0.043274	0.875789	-0.294046	0.323387	1.05273	0.676785	0.316249	-0.299986	0.611538	0.203905	0.0629264	0.0317534	0.413066	0.625149	0.0989721	0.953764	-0.0405954	0.0874862	0.366332	1.08354	0.0678019	2.03688	0.00918578	0.235729	-0.38597	Q14697	Neutral alpha-glucosidase AB OS=Homo sapiens OX=9606 GN=GANAB PE=1 SV=3	>sp|Q14697|GANAB_HUMAN Neutral alpha-glucosidase AB OS=Homo sapiens OX=9606 GN=GANAB PE=1 SV=3	36	30	154
0.696159	0.253808	1.32857	0.62178	-0.492168	-0.295854	1.30994	0.550082	-0.409026	0.684156	0.639454	-0.111633	1.65257	-0.606509	1.1765	-0.59132	-1.55669	-0.460619	0.8628	-0.879691	0.0440583	0.530637	0.0336988	0.0139039	0.128124	0.410253	-1.15605	0.569422	-0.124448	-1.30901	1.20392	-0.324329	1.50824	0.465474	0.580241	-0.613962	-0.502471	1.89618	0.0243627	-0.108566	1.50963	0.0309296	0.236015	-0.55215	O15240	Neurosecretory protein VGF OS=Homo sapiens OX=9606 GN=VGF PE=1 SV=2	>sp|O15240|VGF_HUMAN Neurosecretory protein VGF OS=Homo sapiens OX=9606 GN=VGF PE=1 SV=2	59	34	914
NaN	NaN	NaN	NaN	NaN	NaN	NaN	NaN	NaN	NaN	NaN	NaN	NaN	NaN	NaN	NaN	NaN	NaN	NaN	NaN	-1.21656	-0.588595	-0.408315	-0.445573	0.381298	-0.667325	2.95703	1.25484	0.142734	0.644861	NaN	NaN	NaN	NaN	NaN	NaN	NaN	NaN	NaN	NaN	1.0935	0.0806314	0.236157	1.32198	Q7Z7L8	Uncharacterized protein C11orf96 OS=Homo sapiens OX=9606 GN=C11orf96 PE=1 SV=3	>sp|Q7Z7L8|CK096_HUMAN Uncharacterized protein C11orf96 OS=Homo sapiens OX=9606 GN=C11orf96 PE=1 SV=3	6	1	3
NaN	NaN	NaN	NaN	NaN	NaN	NaN	NaN	NaN	NaN	NaN	NaN	NaN	NaN	NaN	NaN	NaN	NaN	NaN	NaN	NaN	NaN	NaN	NaN	NaN	NaN	NaN	NaN	NaN	NaN	0.127189	1.11458	0.470299	0.22358	0.503666	-0.306163	0.0718146	-0.4042	0.141405	0.216312	1.46988	0.033894	0.236315	-0.544029	H0YC99	Latent-transforming growth factor beta-binding protein 3 (Fragment) OS=Homo sapiens OX=9606 GN=LTBP3 PE=1 SV=1	>tr|H0YC99|H0YC99_HUMAN Latent-transforming growth factor beta-binding protein 3 (Fragment) OS=Homo sapiens OX=9606 GN=LTBP3 PE=1 SV=1	18	11	29
-0.0191407	0.188652	-0.447678	-0.335076	0.0371313	0.302215	-0.335932	0.993465	-0.384135	-0.271452	0.431169	-0.222142	-0.30724	0.19542	-0.171897	0.595583	0.925629	0.404492	-0.748654	0.15963	-0.238072	0.511938	-0.169429	-0.280527	-0.612791	0.258283	1.04229	0.151809	1.77248	0.685999	-0.193567	-0.0611675	0.197148	-0.354119	-0.234547	0.933985	0.138855	0.164355	-0.599583	-0.135101	1.8935	0.0127791	0.236318	0.407007	P52209	6-phosphogluconate dehydrogenase, decarboxylating OS=Homo sapiens OX=9606 GN=PGD PE=1 SV=3	>sp|P52209|6PGD_HUMAN 6-phosphogluconate dehydrogenase, decarboxylating OS=Homo sapiens OX=9606 GN=PGD PE=1 SV=3	20	7	22
-0.896397	0.558958	-1.43487	0.0856579	-0.314036	1.68639	-0.125557	-0.972181	0.502993	1.93638	0.449484	-1.11285	-0.212479	0.398518	0.983486	-0.658736	1.07717	1.64447	0.469311	2.05389	-1.88409	-0.680001	-1.29037	0.634235	-1.08022	-0.987369	0.998432	-0.669379	1.02699	0.17578	0.30353	-0.0818392	-0.209395	0.616651	0.546896	1.16662	0.116911	-0.755425	-0.0896193	-0.724795	1.41217	0.0387109	0.236496	0.62457	P02748	Complement component C9 OS=Homo sapiens OX=9606 GN=C9 PE=1 SV=2	>sp|P02748|CO9_HUMAN Complement component C9 OS=Homo sapiens OX=9606 GN=C9 PE=1 SV=2	56	28	432
0.307473	0.484255	0.947981	0.358818	0.293073	0.0147353	1.02251	0.187805	-0.46434	-0.06813	0.181558	0.568892	0.710545	0.255255	0.510221	0.206138	-0.832525	-0.22576	0.497779	-0.415424	0.566323	-0.0697913	-0.0240448	-0.13	0.326957	0.0893907	-0.810559	0.195423	0.0253507	-0.520703	0.729302	-0.184443	1.09222	0.133554	-0.324047	-0.911013	-0.386802	0.597784	0.0579422	0.676092	1.98881	0.010261	0.236498	-0.38992	H3BLU2	Limbic system-associated membrane protein (Fragment) OS=Homo sapiens OX=9606 GN=LSAMP PE=1 SV=1	>tr|H3BLU2|H3BLU2_HUMAN Limbic system-associated membrane protein (Fragment) OS=Homo sapiens OX=9606 GN=LSAMP PE=1 SV=1	46	15	570
0.614439	0.466668	-0.428833	-0.146323	0.349247	0.742686	0.0723171	0.706502	1.26638	0.890035	NaN	NaN	NaN	NaN	NaN	NaN	NaN	NaN	NaN	NaN	0.167465	0.0889336	-0.0353278	-0.598453	-0.491755	-0.78922	0.649087	0.233784	0.305692	-0.04974	-0.586041	-0.778254	0.390196	-0.369174	-0.07628	0.0399088	0.515864	-0.181481	0.277866	0.408473	1.77609	0.0167458	0.236855	0.434776	Q9ULZ3	Apoptosis-associated speck-like protein containing a CARD OS=Homo sapiens OX=9606 GN=PYCARD PE=1 SV=2	>sp|Q9ULZ3|ASC_HUMAN Apoptosis-associated speck-like protein containing a CARD OS=Homo sapiens OX=9606 GN=PYCARD PE=1 SV=2	35	6	14
0.47385	0.157771	0.901647	0.213436	-0.217516	0.258777	0.766446	-0.130881	-0.451518	-0.225201	0.193646	1.22348	0.481998	0.841908	0.887902	-0.354007	-0.971961	-0.365909	0.345394	-0.918986	0.463225	-0.112585	0.108171	0.252729	0.665477	0.678106	-0.0260799	0.589124	0.0115785	-0.182033	0.797489	-0.758665	0.673168	0.186446	-0.0443986	-0.601296	-0.241969	0.868478	0.322286	-0.134299	1.87981	0.0131883	0.236886	-0.407656	X5DQS5	Cell adhesion molecule 1 isoform C (Fragment) OS=Homo sapiens OX=9606 GN=CADM1 PE=1 SV=1	>tr|X5DQS5|X5DQS5_HUMAN Cell adhesion molecule 1 isoform C (Fragment) OS=Homo sapiens OX=9606 GN=CADM1 PE=1 SV=1	44	12	341
0.346923	0.384054	0.211803	0.834552	0.299903	-0.118605	0.231916	-0.287674	-0.117649	-0.103216	0.566139	-0.173325	0.102636	-0.233585	0.301528	-0.0335538	-0.470176	-0.350003	0.0150466	-0.505012	0.61098	-0.102017	0.359771	0.160719	0.856201	0.52763	0.52781	0.598085	0.181066	-0.161451	0.736521	0.392526	0.853313	0.184143	0.106184	-0.568448	-0.0576787	0.573126	-0.0181273	0.288533	2.37752	0.0041926	0.23695	-0.332367	P78504	Protein jagged-1 OS=Homo sapiens OX=9606 GN=JAG1 PE=1 SV=3	>sp|P78504|JAG1_HUMAN Protein jagged-1 OS=Homo sapiens OX=9606 GN=JAG1 PE=1 SV=3	13	11	40
0.0264354	1.0777	0.697904	0.60651	0.209216	0.639972	0.500921	-0.154475	0.219741	-0.00251357	0.684708	0.236608	0.831818	0.795777	0.279222	0.48303	0.247668	0.733969	0.29145	0.136589	0.782258	-0.00446514	0.876305	-0.046716	1.08481	0.350911	-0.116995	0.48533	-0.102644	-0.116195	0.743961	0.875984	0.846388	0.229663	-0.113118	-0.577988	-0.343003	0.728775	-0.166792	0.552845	2.16775	0.00679601	0.237137	-0.346519	Q92876	Kallikrein-6 OS=Homo sapiens OX=9606 GN=KLK6 PE=1 SV=1	>sp|Q92876|KLK6_HUMAN Kallikrein-6 OS=Homo sapiens OX=9606 GN=KLK6 PE=1 SV=1	64	12	764
0.356834	0.328545	0.507362	0.402782	-0.302063	0.081796	0.770079	-0.0834035	-0.1373	0.308716	0.486132	0.222081	0.890494	0.275778	0.809602	-0.336323	-0.797783	-0.449093	0.268818	-0.659511	0.449009	-0.0723463	0.411449	0.0338194	0.699334	0.634846	-0.343369	0.460613	-0.060805	-0.522001	0.610333	-0.411687	0.638542	0.0176972	-0.0434647	-0.805803	-0.43957	0.913445	-0.167658	0.135135	2.02552	0.00942935	0.237348	-0.37697	Q8WZA1	Protein O-linked-mannose beta-1,2-N-acetylglucosaminyltransferase 1 OS=Homo sapiens OX=9606 GN=POMGNT1 PE=1 SV=2	>sp|Q8WZA1|PMGT1_HUMAN Protein O-linked-mannose beta-1,2-N-acetylglucosaminyltransferase 1 OS=Homo sapiens OX=9606 GN=POMGNT1 PE=1 SV=2	57	32	310
0.552304	0.313793	0.622104	0.332156	-0.12596	0.344172	0.893922	-0.228925	-0.225275	-0.0339012	0.358801	0.555662	0.550559	0.618775	0.758583	0.179865	-0.959606	-0.534999	0.462289	-0.614678	1.03848	-0.0769696	0.484256	0.409843	0.866367	0.682988	-0.0443872	0.773272	0.142416	-0.0480645	0.769429	-0.0879478	0.499517	0.176293	-0.169783	-0.61259	-0.536593	0.859259	0.156942	0.181922	1.98388	0.0103781	0.237417	-0.380412	K7ELL7	Glucosidase 2 subunit beta OS=Homo sapiens OX=9606 GN=PRKCSH PE=1 SV=1	>tr|K7ELL7|K7ELL7_HUMAN Glucosidase 2 subunit beta OS=Homo sapiens OX=9606 GN=PRKCSH PE=1 SV=1	41	20	213
NaN	NaN	NaN	NaN	NaN	NaN	NaN	NaN	NaN	NaN	NaN	NaN	NaN	NaN	NaN	NaN	NaN	NaN	NaN	NaN	NaN	NaN	NaN	NaN	NaN	NaN	NaN	NaN	NaN	NaN	0.626618	0.778054	0.752256	1.39507	1.18354	0.816895	0.910588	-0.615428	0.22424	-0.457634	1.24533	0.0568427	0.237575	-0.771374	P42702	Leukemia inhibitory factor receptor OS=Homo sapiens OX=9606 GN=LIFR PE=1 SV=1	>sp|P42702|LIFR_HUMAN Leukemia inhibitory factor receptor OS=Homo sapiens OX=9606 GN=LIFR PE=1 SV=1	3	2	2
0.080952	-0.204369	0.112434	-0.337589	-0.24196	0.114688	0.601841	-0.599224	-0.30536	-0.278831	0.302256	-0.0096601	0.944489	0.0194509	0.42655	-0.894836	-0.768805	-1.01091	0.460886	-0.616458	0.319895	-0.230969	0.0728416	-0.366931	0.616398	0.356058	-0.712434	0.16007	-0.638123	-0.641903	0.840004	-0.397371	0.269059	0.37451	-0.332203	-0.858861	-0.574889	0.600976	0.0569984	0.0333944	1.90971	0.012311	0.237664	-0.388676	P56817	Beta-secretase 1 OS=Homo sapiens OX=9606 GN=BACE1 PE=1 SV=3	>sp|P56817|BACE1_HUMAN Beta-secretase 1 OS=Homo sapiens OX=9606 GN=BACE1 PE=1 SV=3	10	5	27
0.0780677	-0.110216	0.442763	-0.0903864	0.442289	-0.168303	-0.408174	-0.352729	0.491043	-0.506866	0.317306	0.656166	0.447171	0.236885	0.457394	-0.295012	-0.645422	-0.791086	0.780954	-0.0702729	0.324568	-0.226197	0.545179	-0.530525	2.06372	0.634901	0.415722	0.125604	0.293363	-0.142312	0.855682	0.126114	0.892165	-0.13163	-0.287523	0.198839	-0.360714	-0.238746	-0.47351	-0.142824	1.8558	0.0139381	0.237678	-0.408227	H0YMD1	Low-density lipoprotein receptor OS=Homo sapiens OX=9606 GN=LDLR PE=1 SV=1	>tr|H0YMD1|H0YMD1_HUMAN Low-density lipoprotein receptor OS=Homo sapiens OX=9606 GN=LDLR PE=1 SV=1	21	14	44
0.274402	0.411164	0.164028	-0.0637438	-0.0775798	-0.0840383	0.270574	-0.521162	0.00282847	0.120706	0.136493	0.707742	0.12851	0.562369	0.327463	-0.423072	-0.684478	-0.00722212	0.391033	-0.453415	0.544746	-0.592353	0.310847	0.723341	0.0929683	0.245605	-0.518357	0.7168	-0.264811	0.364582	0.244734	-0.0618672	0.405322	0.354013	0.531862	-0.319902	-0.445464	0.0612093	0.234001	-0.127084	2.33157	0.00466049	0.238014	-0.328306	Q8NFZ4	Neuroligin-2 OS=Homo sapiens OX=9606 GN=NLGN2 PE=1 SV=1	>sp|Q8NFZ4|NLGN2_HUMAN Neuroligin-2 OS=Homo sapiens OX=9606 GN=NLGN2 PE=1 SV=1	29	16	86
NaN	NaN	NaN	NaN	NaN	NaN	NaN	NaN	NaN	NaN	-0.0434986	0.364817	0.275299	0.47989	0.298569	-0.390097	-0.851866	-0.0381871	0.0493947	-1.06476	0.126728	0.543918	-0.0940524	-0.0818787	0.235654	1.03971	-0.255995	-0.23139	-0.0600864	-0.402235	-1.20197	1.15414	-1.26733	0.516073	0.553978	0.3221	-0.763664	-1.49758	-1.18884	-0.710617	1.49632	0.031892	0.238357	-0.526964	Q9P244	Leucine-rich repeat and fibronectin type III domain-containing protein 1 OS=Homo sapiens OX=9606 GN=LRFN1 PE=1 SV=2	>sp|Q9P244|LRFN1_HUMAN Leucine-rich repeat and fibronectin type III domain-containing protein 1 OS=Homo sapiens OX=9606 GN=LRFN1 PE=1 SV=2	5	3	5
NaN	NaN	NaN	NaN	NaN	NaN	NaN	NaN	NaN	NaN	0.286821	0.113323	0.22711	0.381333	0.486805	0.127417	0.39077	0.680582	0.0205577	0.36559	NaN	NaN	NaN	NaN	NaN	NaN	NaN	NaN	NaN	NaN	-0.229214	0.043469	-0.0429273	-1.0904	0.0972313	1.41046	0.52927	-0.0345525	0.52037	1.26046	1.56392	0.0272946	0.238479	0.499737	Q1ZYL8	Izumo sperm-egg fusion protein 4 OS=Homo sapiens OX=9606 GN=IZUMO4 PE=2 SV=2	>sp|Q1ZYL8|IZUM4_HUMAN Izumo sperm-egg fusion protein 4 OS=Homo sapiens OX=9606 GN=IZUMO4 PE=2 SV=2	4	1	2
-0.291812	0.0530727	0.127837	-0.482483	-1.3223	-1.10261	-0.294847	-0.972697	-0.876548	-0.573217	-0.404544	0.136983	0.14648	0.345381	-0.0324512	-0.424015	-1.42804	-0.505932	1.01047	-0.478523	0.0337787	-0.122968	-0.00479486	0.674315	0.575864	-0.106476	-1.60506	0.696454	0.0935838	0.0500815	0.636993	-0.0780177	0.0947512	-0.527903	0.0825429	-0.85006	-0.837226	-0.380576	0.224079	-0.805589	1.73621	0.0183564	0.238484	-0.440373	O60888	Protein CutA OS=Homo sapiens OX=9606 GN=CUTA PE=1 SV=2	>sp|O60888|CUTA_HUMAN Protein CutA OS=Homo sapiens OX=9606 GN=CUTA PE=1 SV=2	49	7	141
0.412272	0.010564	0.548767	0.153651	0.0842634	0.105668	0.455926	0.123334	0.155799	-0.0665141	0.413255	0.341812	0.319314	0.373357	0.594188	-0.381449	-0.346964	-0.136482	0.409875	-0.602167	0.670344	-0.31082	0.517509	0.533273	0.669061	0.469781	-0.143407	0.375052	-0.205689	-0.111707	0.559893	0.0753336	0.414465	0.280115	0.213883	-0.322504	-0.219719	0.37509	0.4545	0.404448	2.61525	0.00242521	0.238558	-0.304081	Q9Y4L1	Hypoxia up-regulated protein 1 OS=Homo sapiens OX=9606 GN=HYOU1 PE=1 SV=1	>sp|Q9Y4L1|HYOU1_HUMAN Hypoxia up-regulated protein 1 OS=Homo sapiens OX=9606 GN=HYOU1 PE=1 SV=1	37	30	189
NaN	NaN	NaN	NaN	NaN	NaN	NaN	NaN	NaN	NaN	NaN	NaN	NaN	NaN	NaN	NaN	NaN	NaN	NaN	NaN	-0.385966	-0.649984	0.268885	-0.310431	-0.0735229	0.0617977	0.313906	0.14351	0.145078	0.687872	NaN	NaN	NaN	NaN	NaN	NaN	NaN	NaN	NaN	NaN	1.51139	0.0308042	0.238562	0.500636	P04629	High affinity nerve growth factor receptor OS=Homo sapiens OX=9606 GN=NTRK1 PE=1 SV=4	>sp|P04629|NTRK1_HUMAN High affinity nerve growth factor receptor OS=Homo sapiens OX=9606 GN=NTRK1 PE=1 SV=4	2	1	1
0.818219	0.0548671	0.110592	-0.0299926	0.606869	-0.817353	0.153932	-0.779386	0.447041	-0.724991	-0.174118	0.549934	0.0244547	0.803207	-0.143027	0.192827	-0.0122842	0.826966	0.263082	-0.109978	1.1516	-0.71052	1.56588	1.5646	0.111447	0.371093	-1.15329	0.395144	-0.612294	0.96165	0.169769	1.59141	0.321133	-0.331394	0.299146	-0.254619	0.241163	-1.10654	0.415003	0.126461	1.63688	0.0230741	0.238742	-0.476523	O00115	Deoxyribonuclease-2-alpha OS=Homo sapiens OX=9606 GN=DNASE2 PE=1 SV=2	>sp|O00115|DNS2A_HUMAN Deoxyribonuclease-2-alpha OS=Homo sapiens OX=9606 GN=DNASE2 PE=1 SV=2	17	6	39
0.628852	0.128095	1.02338	0.363239	-0.358006	-0.121155	1.08441	-0.516802	-0.372298	-0.415099	1.17361	0.111369	1.27837	0.0303347	0.652822	-0.519065	-1.02996	-0.237841	0.902709	-0.113782	1.28434	-0.553288	0.520606	0.485697	0.0718736	0.272888	-0.967442	0.905636	-0.616472	-0.0780257	0.428346	0.0275389	0.939275	0.506987	-1.0378	-1.03337	-0.940132	1.55968	-0.550329	0.525145	1.5593	0.0275866	0.238753	-0.498347	O15394	Neural cell adhesion molecule 2 OS=Homo sapiens OX=9606 GN=NCAM2 PE=1 SV=2	>sp|O15394|NCAM2_HUMAN Neural cell adhesion molecule 2 OS=Homo sapiens OX=9606 GN=NCAM2 PE=1 SV=2	51	34	585
-0.191574	0.672189	0.0711519	-0.117712	0.266953	-0.107451	0.643963	0.536636	0.167607	-0.0720133	0.303888	-0.756625	-0.287038	-0.807793	-0.0596399	-0.0941247	0.455756	0.726075	0.385532	0.139917	-0.0242441	-0.341881	0.0754999	0.190555	0.125727	0.52099	1.0662	0.180198	0.654792	-0.0521109	0.115254	-0.153421	0.272181	-0.00342722	-0.0288424	0.127289	0.298705	0.222745	-0.350418	0.449871	2.34325	0.00453681	0.238859	0.328948	P16152	Carbonyl reductase [NADPH] 1 OS=Homo sapiens OX=9606 GN=CBR1 PE=1 SV=3	>sp|P16152|CBR1_HUMAN Carbonyl reductase [NADPH] 1 OS=Homo sapiens OX=9606 GN=CBR1 PE=1 SV=3	72	15	78
1.1683	-0.136519	1.12271	1.23976	0.642551	0.57994	0.395181	-0.00669694	0.940569	-0.946353	0.0707222	1.91343	0.536034	-0.250479	0.22597	-0.225313	0.365596	-0.503391	0.165827	-0.695632	-0.214949	-0.831178	-0.0793009	-0.130712	-0.336344	-0.504982	-0.579046	-0.478371	-0.780547	-0.971408	0.0533326	0.269701	-0.226015	0.164426	-0.200983	-0.0182662	-0.275553	-0.366805	0.0918491	-0.206821	1.65992	0.0218817	0.238927	-0.451034	Q9P273	Teneurin-3 OS=Homo sapiens OX=9606 GN=TENM3 PE=2 SV=3	>sp|Q9P273|TEN3_HUMAN Teneurin-3 OS=Homo sapiens OX=9606 GN=TENM3 PE=2 SV=3	8	15	21
0.389858	0.262535	1.04295	0.316869	-0.23421	-0.15298	0.284139	-0.248731	-0.810191	-0.102936	-0.526446	1.22039	0.0609762	0.375664	0.592956	-0.321842	-1.1732	-0.663642	-0.100009	-0.926016	1.00074	-0.0179453	0.593979	-0.0453689	1.14653	0.965369	-0.0976377	0.550133	0.253442	-0.321223	0.535176	-0.243729	0.296945	-0.544541	-0.230935	-1.00919	-0.416458	0.708609	0.609261	0.243454	1.70748	0.0196121	0.239056	-0.436103	Q5T848	Probable G-protein coupled receptor 158 OS=Homo sapiens OX=9606 GN=GPR158 PE=1 SV=1	>sp|Q5T848|GP158_HUMAN Probable G-protein coupled receptor 158 OS=Homo sapiens OX=9606 GN=GPR158 PE=1 SV=1	3	3	32
0.912589	-0.00328701	1.67462	0.625678	-0.104968	-0.247987	0.311346	0.871522	-0.691369	1.32763	0.0877236	0.830588	1.73907	0.267705	1.96868	0.206336	-1.46036	-0.0962332	0.638608	-1.3124	-0.220031	0.266041	-0.293497	0.244669	0.458882	-0.0556648	-0.555208	0.439091	-0.395556	-0.809403	0.313518	-1.32579	1.15742	-0.137368	-0.755175	-1.31986	-0.720344	0.936069	-0.32788	-0.147164	1.45931	0.0347288	0.239126	-0.555795	Q13519	Prepronociceptin OS=Homo sapiens OX=9606 GN=PNOC PE=1 SV=1	>sp|Q13519|PNOC_HUMAN Prepronociceptin OS=Homo sapiens OX=9606 GN=PNOC PE=1 SV=1	47	5	51
-2.61776	-3.74251	-1.76772	-2.91029	-2.55768	-2.22946	-3.56268	4.83908	-2.1657	-2.4772	-3.17811	-3.29305	-3.55108	-3.2182	-3.99831	-2.21674	-2.24191	-1.41137	1.60003	6.1786	-2.31738	3.41488	-3.10125	-2.75507	-1.79133	-4.83387	2.66328	-4.55446	4.02844	-2.29408	-2.28663	1.70042	0.896375	-2.90147	-2.52521	5.53164	-1.57943	-2.01711	-4.10403	-0.776223	1.05689	0.0877221	0.239366	1.54391	P00918	Carbonic anhydrase 2 OS=Homo sapiens OX=9606 GN=CA2 PE=1 SV=2	>sp|P00918|CAH2_HUMAN Carbonic anhydrase 2 OS=Homo sapiens OX=9606 GN=CA2 PE=1 SV=2	50	10	53
-0.67981	-1.22421	0.364516	0.473743	-0.629946	0.327462	2.36111	-0.310231	-0.495133	-0.556791	-0.523749	-1.13631	-0.711032	-0.502098	-0.594151	-0.536716	-0.172266	0.305704	-0.232249	1.31398	-0.149705	0.0971691	-0.116097	-0.268664	0.358565	0.163121	0.692543	0.146987	0.406542	-0.119768	0.185902	0.0938511	0.472242	0.225641	-0.0222878	0.731477	-0.190426	0.701878	0.213999	0.197804	1.65865	0.0219458	0.239585	0.461773	Q9UNZ2	NSFL1 cofactor p47 OS=Homo sapiens OX=9606 GN=NSFL1C PE=1 SV=2	>sp|Q9UNZ2|NSF1C_HUMAN NSFL1 cofactor p47 OS=Homo sapiens OX=9606 GN=NSFL1C PE=1 SV=2	14	3	8
NaN	NaN	NaN	NaN	NaN	NaN	NaN	NaN	NaN	NaN	1.2677	0.895821	0.816494	-0.25668	1.35732	0.255403	0.0970399	0.738647	-1.18342	0.00814688	1.7248	-0.264472	0.768007	-0.497888	0.00660141	-0.426927	-0.0751548	-0.387496	0.190768	0.244106	NaN	NaN	NaN	NaN	NaN	NaN	NaN	NaN	NaN	NaN	1.33816	0.0459028	0.23972	-0.63566	P24666	Low molecular weight phosphotyrosine protein phosphatase OS=Homo sapiens OX=9606 GN=ACP1 PE=1 SV=3	>sp|P24666|PPAC_HUMAN Low molecular weight phosphotyrosine protein phosphatase OS=Homo sapiens OX=9606 GN=ACP1 PE=1 SV=3	18	2	12
0.19988	0.682172	0.294067	0.465299	-0.830087	0.183376	0.662409	0.118499	-0.520685	0.590614	1.0712	-0.282183	1.44985	-0.0806692	1.27799	-1.31823	-2.26834	-1.96917	0.680427	-0.535963	0.415514	0.117823	-0.315265	-0.365168	0.656007	0.0527361	-0.461168	0.522123	0.483838	-1.50576	0.762852	-1.07538	0.981004	1.30609	-0.490164	-1.04499	-1.60067	2.0931	0.306329	-0.417283	1.36782	0.0428725	0.240607	-0.609483	Q9BWQ8	Protein lifeguard 2 OS=Homo sapiens OX=9606 GN=FAIM2 PE=1 SV=1	>sp|Q9BWQ8|LFG2_HUMAN Protein lifeguard 2 OS=Homo sapiens OX=9606 GN=FAIM2 PE=1 SV=1	12	3	23
1.6386	0.598587	1.20966	0.0628284	-0.172421	-0.0449953	1.0353	0.335631	-0.523435	0.453108	0.390391	-0.743738	0.717564	-0.854342	-0.0980683	-0.412216	-1.7916	-0.37429	0.759743	-0.626854	0.904809	-0.138191	0.183723	-0.560731	-0.130965	-0.128273	-2.25581	0.182558	-1.27618	-1.1042	1.44312	-0.924194	0.663939	-0.415208	-0.211981	-0.980178	-0.616657	0.0676285	-0.34859	0.322418	1.45019	0.0354656	0.241368	-0.544514	A0A1X7SBT7	Neuronal pentraxin receptor OS=Homo sapiens OX=9606 GN=NPTXR PE=1 SV=1	>tr|A0A1X7SBT7|A0A1X7SBT7_HUMAN Neuronal pentraxin receptor OS=Homo sapiens OX=9606 GN=NPTXR PE=1 SV=1	38	17	300
0.241703	0.236392	0.481035	0.126493	-0.126092	-0.0409052	0.457971	-0.398029	-0.256822	0.293128	0.476101	0.110733	0.978255	-0.217972	0.574479	-0.739069	-0.643676	-0.334747	0.249042	-0.385943	0.375896	-0.0913547	0.103831	0.0167254	0.278771	0.330769	-0.196037	0.412579	-0.318296	-0.269863	0.469122	-0.227813	0.394707	0.418803	0.129654	-0.457512	-0.558528	0.954924	-0.0857897	-0.0232588	2.19178	0.0064302	0.24139	-0.337977	P10586	Receptor-type tyrosine-protein phosphatase F OS=Homo sapiens OX=9606 GN=PTPRF PE=1 SV=2	>sp|P10586|PTPRF_HUMAN Receptor-type tyrosine-protein phosphatase F OS=Homo sapiens OX=9606 GN=PTPRF PE=1 SV=2	30	39	373
-0.422806	-0.120859	0.372074	0.638208	-0.214422	-0.313013	0.0696686	-0.22541	-0.958357	-0.872744	-0.857289	-0.0998553	0.0437046	-0.0811723	-0.02359	-0.396016	-1.41337	-0.914215	-0.176568	-0.170349	-0.936618	0.690107	-1.34391	0.605966	0.0776288	0.139075	-1.70773	-0.752011	-0.650079	-0.523505	-0.0477359	-0.237137	-0.58966	-0.479454	-1.25655	-0.787256	-1.90641	-0.131608	-1.19103	-0.186498	1.67807	0.0209859	0.241438	-0.439203	Q9GZP4	PITH domain-containing protein 1 OS=Homo sapiens OX=9606 GN=PITHD1 PE=1 SV=1	>sp|Q9GZP4|PITH1_HUMAN PITH domain-containing protein 1 OS=Homo sapiens OX=9606 GN=PITHD1 PE=1 SV=1	42	8	48
0.542107	0.357016	0.616821	0.534932	-0.114942	0.0685297	0.666926	-0.0613393	-0.198654	0.0469937	0.548424	0.986642	0.188377	0.331229	0.560625	-0.420304	-0.270936	-0.365278	0.559169	-0.32838	0.444295	0.22233	0.191748	-0.152944	0.0465658	0.306179	-0.651	0.127966	0.216239	-0.446744	0.615931	0.880451	0.670295	-0.292049	-0.055478	-0.183424	-0.0475899	0.516047	0.253885	0.651206	2.17293	0.00671538	0.242132	-0.334144	Q13634	Cadherin-18 OS=Homo sapiens OX=9606 GN=CDH18 PE=2 SV=1	>sp|Q13634|CAD18_HUMAN Cadherin-18 OS=Homo sapiens OX=9606 GN=CDH18 PE=2 SV=1	12	7	22
0.388852	-0.331507	0.388997	-1.05511	0.568574	0.178959	-0.394166	0.821256	0.969499	0.202475	1.0979	-0.432167	1.34865	-0.524858	0.552595	1.10227	0.117031	0.832546	0.122144	0.75547	0.174901	-0.309501	0.572563	0.941353	0.729608	0.832928	2.05869	1.51784	0.89943	3.14751	NaN	NaN	NaN	NaN	NaN	NaN	NaN	NaN	NaN	NaN	1.35986	0.0436656	0.242169	0.603534	Q9NQ30	Endothelial cell-specific molecule 1 OS=Homo sapiens OX=9606 GN=ESM1 PE=1 SV=2	>sp|Q9NQ30|ESM1_HUMAN Endothelial cell-specific molecule 1 OS=Homo sapiens OX=9606 GN=ESM1 PE=1 SV=2	17	3	5
0.873245	2.13837	1.07361	0.983768	0.330345	-0.170106	1.07641	0.563192	0.373871	-0.331953	0.868624	-0.375564	0.751909	-0.262707	0.80833	-0.523799	-0.512326	0.678582	0.59808	0.240162	-0.135877	0.10975	-0.544883	0.426839	1.05498	0.0918429	1.55889	-0.0526187	-0.231183	-0.0934974	1.01125	0.802973	1.34621	0.416685	1.07155	0.120874	-0.042136	0.0255	-0.538409	0.870536	1.61736	0.0241345	0.242178	-0.452375	O95084	Serine protease 23 OS=Homo sapiens OX=9606 GN=PRSS23 PE=1 SV=1	>sp|O95084|PRS23_HUMAN Serine protease 23 OS=Homo sapiens OX=9606 GN=PRSS23 PE=1 SV=1	12	3	15
1.0577	-0.0647455	-0.345833	-0.437679	-0.128977	0.150842	-0.227879	0.339171	-0.196561	0.387643	4.71833	0.0871027	4.43302	1.28164	-0.626124	-1.4454	-0.819177	-1.58028	0.896406	1.15668	-0.222504	-0.228559	0.393788	0.0851926	-0.603668	-0.199801	0.642727	-0.21912	-0.196042	2.12236	1.9373	0.243977	2.73446	0.924326	1.0586	0.844785	-0.12974	-0.0448985	-0.412367	-0.110792	1.21831	0.0604903	0.24221	-0.766939	Q9Y490	Talin-1 OS=Homo sapiens OX=9606 GN=TLN1 PE=1 SV=3	>sp|Q9Y490|TLN1_HUMAN Talin-1 OS=Homo sapiens OX=9606 GN=TLN1 PE=1 SV=3	9	13	24
-0.294175	0.46199	0.798272	0.44369	0.96123	0.289496	0.356872	1.9676	0.311051	1.25631	-0.58816	-0.485987	-0.129567	-0.167342	-0.0484152	1.50598	0.765297	2.01713	-0.739819	0.601692	0.618063	-0.013616	1.44952	-0.340269	0.909686	0.667675	0.557002	0.213378	0.87693	0.531336	0.229591	-0.0900527	0.281911	0.0886014	-0.303576	0.219904	1.20816	-0.912745	0.329425	1.31375	1.57033	0.0268948	0.242267	0.477751	Q99969	Retinoic acid receptor responder protein 2 OS=Homo sapiens OX=9606 GN=RARRES2 PE=1 SV=1	>sp|Q99969|RARR2_HUMAN Retinoic acid receptor responder protein 2 OS=Homo sapiens OX=9606 GN=RARRES2 PE=1 SV=1	50	6	133
0.296602	-0.46522	0.856586	-0.0287839	-0.503602	-0.507134	0.580461	-0.62558	-0.457849	0.0557206	1.10146	0.328228	1.83462	0.161556	0.982696	-0.897824	-1.66316	-0.83702	0.677928	-0.347074	0.767083	0.0650972	0.465992	-0.032801	0.675208	0.484744	0.07469	0.903114	-0.136411	-0.509112	0.439509	-0.845337	0.345778	0.288457	-0.155464	-0.605957	-0.961683	1.51119	0.198878	-0.116143	1.52722	0.0297017	0.242291	-0.487794	H0Y4H1	Receptor-type tyrosine-protein phosphatase F (Fragment) OS=Homo sapiens OX=9606 GN=PTPRF PE=1 SV=1	>tr|H0Y4H1|H0Y4H1_HUMAN Receptor-type tyrosine-protein phosphatase F (Fragment) OS=Homo sapiens OX=9606 GN=PTPRF PE=1 SV=1	22	19	164
0.573453	0.18641	0.285896	0.194174	0.158854	-0.0523897	0.373821	-0.400768	0.321705	-0.209149	0.109324	0.546003	-0.0480247	0.178747	-0.0222215	-0.107878	-0.651167	0.324349	0.051174	-0.248561	0.463631	-0.296114	0.721628	1.04022	0.223502	0.103689	-0.420833	0.411813	-0.0472614	0.124611	-0.124853	0.683993	0.0810057	0.447669	0.330044	0.00286652	-0.158559	-0.205642	0.395903	0.000715884	2.4878	0.00325234	0.242744	-0.306245	Q9NZ94	Neuroligin-3 OS=Homo sapiens OX=9606 GN=NLGN3 PE=1 SV=2	>sp|Q9NZ94|NLGN3_HUMAN Neuroligin-3 OS=Homo sapiens OX=9606 GN=NLGN3 PE=1 SV=2	16	11	47
-0.365783	0.579746	-0.498104	0.321559	0.493843	1.5372	1.1059	0.361675	0.67614	0.161379	NaN	NaN	NaN	NaN	NaN	NaN	NaN	NaN	NaN	NaN	NaN	NaN	NaN	NaN	NaN	NaN	NaN	NaN	NaN	NaN	0.166663	-0.398719	-0.26874	-0.175676	-0.919785	-0.649988	-0.0738003	1.22586	-0.142045	0.503877	1.37326	0.0423385	0.242901	0.57712	P36897	TGF-beta receptor type-1 OS=Homo sapiens OX=9606 GN=TGFBR1 PE=1 SV=1	>sp|P36897|TGFR1_HUMAN TGF-beta receptor type-1 OS=Homo sapiens OX=9606 GN=TGFBR1 PE=1 SV=1	2	1	4
0.961565	0.239405	0.480162	-0.303009	-0.488461	0.538151	-0.759753	0.819701	-0.390784	-0.352232	-0.109324	-1.81339	-0.180348	-1.76747	0.783669	-0.735125	0.123794	-0.448454	0.742108	1.0573	-0.709355	-0.470683	-1.02348	-0.987333	-0.489278	-0.46946	1.70069	-0.437788	1.22821	1.63539	-0.0253954	0.681868	0.474917	0.602777	-0.0418513	1.30004	0.379029	1.17278	-0.654695	0.390807	1.42119	0.0379146	0.242974	0.551236	P37802	Transgelin-2 OS=Homo sapiens OX=9606 GN=TAGLN2 PE=1 SV=3	>sp|P37802|TAGL2_HUMAN Transgelin-2 OS=Homo sapiens OX=9606 GN=TAGLN2 PE=1 SV=3	54	9	34
-1.98625	1.99548	-0.604716	-2.3338	-0.786417	0.243076	2.17442	2.02215	0.557083	1.7857	-0.425132	-0.99615	0.0390102	-0.124797	-0.923971	-0.325447	3.45572	-0.985747	-0.0921295	-1.10849	-1.86624	0.642686	-0.703841	1.42023	-2.6584	-3.55749	-0.0113908	-0.875103	-0.309371	0.757501	-0.367541	-0.107269	0.0685531	-1.45486	-2.22829	2.11771	1.0367	-2.32935	1.56284	-1.81252	1.16525	0.0683515	0.243035	0.885379	A0A087WSY4	Immunoglobulin heavy variable 4-30-2 OS=Homo sapiens OX=9606 GN=IGHV4-30-2 PE=3 SV=1	>sp|A0A087WSY4|HV432_HUMAN Immunoglobulin heavy variable 4-30-2 OS=Homo sapiens OX=9606 GN=IGHV4-30-2 PE=3 SV=1	26	3	65
-0.322499	-0.151473	0.22288	-0.296008	0.152189	0.0483014	-0.105495	-0.178039	0.143684	-0.0790454	-1.45956	0.158951	-1.43665	-0.110531	0.168348	-0.247575	0.464904	0.920285	0.715092	-0.192579	0.297014	0.095415	1.0079	0.091399	0.276973	0.702093	0.795329	0.354569	0.662698	0.399583	-1.29508	0.143409	-0.104165	-0.87052	-0.7436	-0.543835	-0.00607214	-0.513447	0.354571	0.648702	1.70324	0.0198042	0.243497	0.425967	Q76M96	Coiled-coil domain-containing protein 80 OS=Homo sapiens OX=9606 GN=CCDC80 PE=1 SV=1	>sp|Q76M96|CCD80_HUMAN Coiled-coil domain-containing protein 80 OS=Homo sapiens OX=9606 GN=CCDC80 PE=1 SV=1	6	5	10
-0.036648	0.0320658	-0.241813	-0.282665	-0.187984	-0.259896	-0.075786	-0.626675	0.00795927	0.179799	-0.425386	-0.92923	-0.749256	-1.01922	-0.784016	-0.826842	-0.0607105	-0.673035	-0.785021	1.94647	-0.506875	-0.716958	-0.686535	-0.200583	-0.334521	0.0570284	-0.402059	-0.0988366	-0.751193	1.14322	-0.791944	-0.355995	-0.395015	0.101158	-0.000850234	0.0871142	2.42643	-0.413487	-0.0570679	0.126874	1.55405	0.0279225	0.243522	0.472828	Q9Y4D7	Plexin-D1 OS=Homo sapiens OX=9606 GN=PLXND1 PE=1 SV=3	>sp|Q9Y4D7|PLXD1_HUMAN Plexin-D1 OS=Homo sapiens OX=9606 GN=PLXND1 PE=1 SV=3	9	10	33
0.439402	0.68174	0.552445	0.50001	-0.369691	-0.38179	0.593385	-0.0830998	-0.809298	-0.113701	0.204574	0.547619	0.986633	1.08331	0.517622	-0.245768	-1.15617	-1.30771	0.538035	-0.555197	0.528464	-0.197435	0.232036	0.558393	0.838684	0.705689	0.382894	1.17394	0.503207	0.11012	0.827799	-0.464341	0.85958	-0.246548	0.155847	-0.510583	-0.30304	1.09513	0.483103	-0.701828	1.6298	0.023453	0.245329	-0.440942	Q9ULP0	Protein NDRG4 OS=Homo sapiens OX=9606 GN=NDRG4 PE=1 SV=2	>sp|Q9ULP0|NDRG4_HUMAN Protein NDRG4 OS=Homo sapiens OX=9606 GN=NDRG4 PE=1 SV=2	30	8	44
0.626529	0.874885	0.244674	0.0893881	-0.456362	-0.671046	0.734388	-1.03367	0.164243	0.0722273	0.497459	0.167345	0.611519	0.554587	0.282945	-0.653045	-1.04949	-0.290583	0.636388	-0.515776	0.983713	-0.638219	0.494229	0.375745	0.275339	0.498332	-0.579711	0.627051	-0.0055908	0.21945	0.991285	0.221846	0.628609	-0.0875155	-0.0442507	-0.800143	-0.594922	0.791933	0.6612	0.209137	1.71561	0.0192481	0.245525	-0.413668	Q9NT99	Leucine-rich repeat-containing protein 4B OS=Homo sapiens OX=9606 GN=LRRC4B PE=2 SV=3	>sp|Q9NT99|LRC4B_HUMAN Leucine-rich repeat-containing protein 4B OS=Homo sapiens OX=9606 GN=LRRC4B PE=2 SV=3	35	27	246
0.870401	0.437467	0.091928	-0.260589	0.259617	1.18257	0.839918	0.860841	0.0515585	0.576689	0.539375	0.0459817	0.478747	-0.359892	-0.0166712	-0.134771	1.14885	2.01193	0.739613	0.125742	-0.0389484	2.00268	0.0611123	0.028584	0.62155	0.508533	1.57412	0.950393	1.01763	0.286359	0.642429	-0.33977	0.455753	0.0818388	-0.224599	-0.0726156	0.00585161	1.29275	-0.0936048	1.11362	1.63971	0.0229239	0.250891	0.430449	Q9NP84	Tumor necrosis factor receptor superfamily member 12A OS=Homo sapiens OX=9606 GN=TNFRSF12A PE=1 SV=1	>sp|Q9NP84|TNR12_HUMAN Tumor necrosis factor receptor superfamily member 12A OS=Homo sapiens OX=9606 GN=TNFRSF12A PE=1 SV=1	23	2	11
-0.372636	-0.157797	-0.744228	-0.433702	-0.194905	0.0861658	-0.279319	1.02185	-0.315128	-0.544882	0.0977905	0.0344373	-0.428168	-0.845155	-0.266398	-0.796145	0.388359	-0.348999	-0.767691	0.180271	-0.0403949	-0.532304	0.0900638	0.346158	0.200621	0.0361368	0.610972	0.232229	1.23612	0.515611	-0.445927	-1.08867	-0.486117	-0.066761	-0.38793	0.520199	-0.103779	-0.109568	-0.142309	0.366088	1.8522	0.0140541	0.251366	0.37541	Q96HC4	PDZ and LIM domain protein 5 OS=Homo sapiens OX=9606 GN=PDLIM5 PE=1 SV=5	>sp|Q96HC4|PDLI5_HUMAN PDZ and LIM domain protein 5 OS=Homo sapiens OX=9606 GN=PDLIM5 PE=1 SV=5	14	5	10
-1.28615	0.199506	-0.763186	-0.784801	-1.82607	1.15671	-0.518123	-0.268981	-0.446844	0.341776	-0.767283	-0.334002	-1.12754	0.0113337	-0.712588	1.68961	0.568638	2.05504	-0.19348	1.09512	0.544776	-0.593805	0.990198	0.289379	-0.116807	-0.476304	0.0690132	-0.39132	-0.0918409	-0.0647965	-1.23569	-0.189395	-0.992988	-1.25354	-0.764595	-0.47869	-0.457027	-1.68557	-1.62425	0.0650773	1.37205	0.0424571	0.254111	0.55285	Q96NY7	Chloride intracellular channel protein 6 OS=Homo sapiens OX=9606 GN=CLIC6 PE=2 SV=3	>sp|Q96NY7|CLIC6_HUMAN Chloride intracellular channel protein 6 OS=Homo sapiens OX=9606 GN=CLIC6 PE=2 SV=3	17	7	13
-1.1019	0.591826	-1.32939	1.06345	0.409569	-0.265711	-1.14604	-1.39586	-1.03776	-0.510862	0.350039	-0.381435	1.37347	0.168145	2.96992	0.0577257	-0.988862	-0.497375	0.476102	-0.579795	0.19122	0.524447	0.0112087	-0.0451696	0.405689	0.490028	0.30606	0.805574	-0.164368	-0.705021	0.352174	-0.721718	0.583129	-0.243029	-1.3953	-1.28839	-0.733527	1.01792	-0.655678	-0.654462	1.35745	0.0439091	0.254178	-0.562332	Q02641	Voltage-dependent L-type calcium channel subunit beta-1 OS=Homo sapiens OX=9606 GN=CACNB1 PE=1 SV=3	>sp|Q02641|CACB1_HUMAN Voltage-dependent L-type calcium channel subunit beta-1 OS=Homo sapiens OX=9606 GN=CACNB1 PE=1 SV=3	5	2	6
0.114185	-0.244073	0.165435	0.457659	0.603302	-1.41564	0.376495	0.198679	0.279204	-0.30122	0.155457	0.673266	0.540672	1.17614	0.581809	-0.144088	-0.673551	0.199535	-0.223054	-0.254579	1.19489	0.597792	1.59126	0.119632	0.905566	1.10627	0.245979	0.621569	-1.19989	0.392823	-0.13271	1.11801	0.0314109	-0.17029	-0.193324	0.107166	0.301652	0.0699049	0.739492	0.345535	1.63186	0.0233419	0.254282	-0.425691	Q9Y240	C-type lectin domain family 11 member A OS=Homo sapiens OX=9606 GN=CLEC11A PE=1 SV=1	>sp|Q9Y240|CLC11_HUMAN C-type lectin domain family 11 member A OS=Homo sapiens OX=9606 GN=CLEC11A PE=1 SV=1	45	15	93
0.53103	0.170117	0.254093	-0.271055	-0.0187436	0.227042	-0.122142	1.05495	-0.117612	-0.140711	-0.377576	-0.137774	-0.678587	0.0378095	0.000787253	-0.0363045	0.192455	0.277258	0.598438	0.795207	0.0316779	-0.0431538	-0.43777	-0.811818	-0.0976255	0.370369	0.585967	-0.250263	0.908539	0.0901138	-0.112262	0.414726	0.0325633	-0.257851	-0.279364	0.0745	0.149692	-0.319839	-0.467274	0.856647	2.05659	0.00877836	0.254613	0.33889	P61204	ADP-ribosylation factor 3 OS=Homo sapiens OX=9606 GN=ARF3 PE=1 SV=2	>sp|P61204|ARF3_HUMAN ADP-ribosylation factor 3 OS=Homo sapiens OX=9606 GN=ARF3 PE=1 SV=2	39	5	16
1.70118	1.53671	-0.291801	0.098806	-0.578345	-0.903133	-0.0453158	-0.0773787	0.643044	-1.47355	-0.143459	-0.629378	-0.609721	-0.386603	-0.216575	-0.749252	-1.51557	-0.0738961	0.794028	0.661228	0.994938	1.28712	0.366676	1.53321	-0.217576	0.275251	-0.629724	0.941678	0.926657	1.16097	2.42927	1.32733	1.35018	0.731368	0.496319	-0.179408	-0.257622	-0.534055	0.863196	-0.366784	1.34206	0.0454928	0.25497	-0.565964	P04406	Glyceraldehyde-3-phosphate dehydrogenase OS=Homo sapiens OX=9606 GN=GAPDH PE=1 SV=3	>sp|P04406|G3P_HUMAN Glyceraldehyde-3-phosphate dehydrogenase OS=Homo sapiens OX=9606 GN=GAPDH PE=1 SV=3	63	19	295
2.38496	1.06811	0.734326	0.530833	0.751241	0.628844	-0.385023	0.561983	0.487616	0.202574	NaN	NaN	NaN	NaN	NaN	NaN	NaN	NaN	NaN	NaN	NaN	NaN	NaN	NaN	NaN	NaN	NaN	NaN	NaN	NaN	NaN	NaN	NaN	NaN	NaN	NaN	NaN	NaN	NaN	NaN	1.14744	0.0712139	0.255234	-0.794696	P07910	Heterogeneous nuclear ribonucleoproteins C1/C2 OS=Homo sapiens OX=9606 GN=HNRNPC PE=1 SV=4	>sp|P07910|HNRPC_HUMAN Heterogeneous nuclear ribonucleoproteins C1/C2 OS=Homo sapiens OX=9606 GN=HNRNPC PE=1 SV=4	15	4	5
0.408657	0.309804	1.02977	0.780146	0.553874	0.246058	1.0492	0.535611	-0.543066	-0.087668	0.454296	1.98485	0.640503	1.43632	0.370947	1.52838	-0.598788	0.064251	0.978205	0.316663	1.48131	0.328493	0.919451	0.185805	1.14881	0.890537	-0.163981	0.527681	0.352899	-0.146197	0.812159	0.34423	1.30656	0.114746	-0.285007	-0.825448	-0.222151	0.742049	-0.0967129	1.05035	1.59267	0.0255463	0.255804	-0.436392	P27797	Calreticulin OS=Homo sapiens OX=9606 GN=CALR PE=1 SV=1	>sp|P27797|CALR_HUMAN Calreticulin OS=Homo sapiens OX=9606 GN=CALR PE=1 SV=1	62	22	291
-1.84468	-2.25656	-2.9713	-1.70256	-3.23013	2.00513	-3.25332	0.710272	-2.50893	-0.509419	-0.89864	-3.97905	-0.460723	-2.37958	-2.56018	-2.60049	-1.06206	-2.18243	-2.51968	-1.34519	-4.38128	-1.96307	-2.60917	-4.49136	-2.56806	-3.8961	-1.70277	-4.55757	8.5001	-2.26416	0.857498	-3.13209	9.69045e-06	0.186519	-1.99432	2.34001	-2.17059	1.80617	-3.5352	2.34617	1.02518	0.0943672	0.255866	1.29893	P15090	Fatty acid-binding protein, adipocyte OS=Homo sapiens OX=9606 GN=FABP4 PE=1 SV=3	>sp|P15090|FABP4_HUMAN Fatty acid-binding protein, adipocyte OS=Homo sapiens OX=9606 GN=FABP4 PE=1 SV=3	31	3	25
NaN	NaN	NaN	NaN	NaN	NaN	NaN	NaN	NaN	NaN	0.146909	0.531791	0.00895655	0.204525	0.132734	0.996068	1.31027	1.40396	0.0241579	0.412044	NaN	NaN	NaN	NaN	NaN	NaN	NaN	NaN	NaN	NaN	NaN	NaN	NaN	NaN	NaN	NaN	NaN	NaN	NaN	NaN	1.25049	0.0561704	0.256568	0.624316	G0XQ39	STIM1L OS=Homo sapiens OX=9606 GN=STIM1 PE=1 SV=1	>tr|G0XQ39|G0XQ39_HUMAN STIM1L OS=Homo sapiens OX=9606 GN=STIM1 PE=1 SV=1	3	1	1
1.49036	0.490349	2.32679	1.7047	0.31877	0.532589	1.29333	1.2891	-0.283517	0.585286	-0.370328	0.27049	-0.0179626	-0.290544	0.47771	0.208429	0.00613709	0.676821	-0.306684	-0.278603	1.01726	0.54699	1.06705	0.648129	1.05322	0.620637	-0.521727	0.412053	-0.478475	-0.545914	0.630289	0.463076	1.18388	-0.483123	0.0299449	-0.310597	0.733915	-0.566314	0.17579	0.0495899	1.50602	0.0311876	0.258349	-0.46326	P23560	Brain-derived neurotrophic factor OS=Homo sapiens OX=9606 GN=BDNF PE=1 SV=1	>sp|P23560|BDNF_HUMAN Brain-derived neurotrophic factor OS=Homo sapiens OX=9606 GN=BDNF PE=1 SV=1	8	2	13
NaN	NaN	NaN	NaN	NaN	NaN	NaN	NaN	NaN	NaN	-1.32533	-1.78055	-1.43473	-2.98827	-1.10267	-0.805032	0.277183	-0.351927	-1.63936	0.266224	NaN	NaN	NaN	NaN	NaN	NaN	NaN	NaN	NaN	NaN	-0.105602	-0.758524	-0.2737	0.548732	1.06794	1.16506	0.706144	-0.367763	-0.0781829	1.57093	1.10007	0.0794198	0.263784	0.889599	A0A0B4J278	Alpha-1-antitrypsin (Fragment) OS=Homo sapiens OX=9606 GN=SERPINA1 PE=1 SV=1	>tr|A0A0B4J278|A0A0B4J278_HUMAN Alpha-1-antitrypsin (Fragment) OS=Homo sapiens OX=9606 GN=SERPINA1 PE=1 SV=1	45	3	271
NaN	NaN	NaN	NaN	NaN	NaN	NaN	NaN	NaN	NaN	0.00586317	-2.11537	-0.739567	-1.92383	-1.69973	-1.36766	-0.479669	-1.48887	0.064798	1.70951	-1.5072	-1.65189	-2.40173	-2.22607	-1.95809	-1.95441	-0.0876222	-1.14977	0.720816	0.834504	0.401003	0.0728507	-0.0592057	-0.0749347	0.251899	2.27667	-0.935917	1.02832	-2.22674	-0.39487	1.13045	0.0740551	0.264537	0.811672	B7Z6Z4	cDNA FLJ56329, highly similar to Myosin light polypeptide 6 OS=Homo sapiens OX=9606 GN=MYL6 PE=1 SV=1	>tr|B7Z6Z4|B7Z6Z4_HUMAN cDNA FLJ56329, highly similar to Myosin light polypeptide 6 OS=Homo sapiens OX=9606 GN=MYL6 PE=1 SV=1	23	4	11
-0.576435	-0.133731	-1.08755	-0.472241	-0.0657514	0.537252	0.0745497	-0.496117	0.319864	0.315944	-0.274281	-0.772762	0.0296217	-0.723581	0.421289	0.151405	0.326014	-0.0385899	-0.579654	-0.191493	-0.329642	0.621017	-0.251649	-0.229026	0.137378	0.341822	0.696898	-0.312509	0.430568	-0.460471	-0.359536	-0.376003	-0.338173	-0.158946	-0.031226	0.441155	0.203058	-0.00425808	0.036859	-0.18226	2.0471	0.00897223	0.264862	0.329063	P05362	Intercellular adhesion molecule 1 OS=Homo sapiens OX=9606 GN=ICAM1 PE=1 SV=2	>sp|P05362|ICAM1_HUMAN Intercellular adhesion molecule 1 OS=Homo sapiens OX=9606 GN=ICAM1 PE=1 SV=2	31	13	71
0.700568	0.546444	0.823697	0.191405	-0.777014	-0.0611319	0.49796	0.118094	-0.850257	0.723891	0.671902	0.326804	1.75352	0.13579	0.965309	-0.542948	-1.66786	-0.563531	1.11512	-0.415405	0.383869	-0.169298	-0.108949	-0.515502	0.312479	0.287484	-0.64605	0.488172	-0.0167622	-1.08766	0.861906	-0.845056	0.960608	0.745502	-0.219378	-1.33384	-1.0169	2.12591	-1.14	0.186744	1.36434	0.0432178	0.265131	-0.527179	O00451	GDNF family receptor alpha-2 OS=Homo sapiens OX=9606 GN=GFRA2 PE=1 SV=2	>sp|O00451|GFRA2_HUMAN GDNF family receptor alpha-2 OS=Homo sapiens OX=9606 GN=GFRA2 PE=1 SV=2	43	18	192
0.477447	-0.244571	0.48039	-0.0961251	0.980725	-0.722625	-0.277683	-0.162451	-0.00430027	-0.702271	0.030191	0.634946	0.0317954	1.39109	0.211936	0.385742	0.261097	1.17287	0.153274	0.578126	1.18049	-0.0816838	1.29033	0.910865	0.756636	0.41923	-0.192307	0.233633	-0.00330406	0.256703	0.522785	1.36729	0.488718	-0.448632	0.23686	-0.3349	0.542071	-0.824006	0.459981	0.80736	1.64203	0.0228017	0.26692	-0.403762	P07686	Beta-hexosaminidase subunit beta OS=Homo sapiens OX=9606 GN=HEXB PE=1 SV=3	>sp|P07686|HEXB_HUMAN Beta-hexosaminidase subunit beta OS=Homo sapiens OX=9606 GN=HEXB PE=1 SV=3	43	21	199
0.277416	0.271257	0.352613	0.0438826	-0.117438	-0.348816	0.382565	-0.509283	-0.0458162	-0.00529448	0.462896	0.377033	0.144255	0.363184	0.318664	-0.672984	-0.798821	-0.656466	0.319919	-0.894408	0.508697	-0.426339	0.238051	0.377942	0.560955	0.509137	-0.511841	0.506561	0.111338	0.0680595	0.414699	0.0532671	0.113966	0.146722	-0.201832	-0.432161	-0.214396	0.38318	0.535566	0.069418	2.01817	0.00959035	0.267236	-0.324222	Q10472	Polypeptide N-acetylgalactosaminyltransferase 1 OS=Homo sapiens OX=9606 GN=GALNT1 PE=1 SV=1	>sp|Q10472|GALT1_HUMAN Polypeptide N-acetylgalactosaminyltransferase 1 OS=Homo sapiens OX=9606 GN=GALNT1 PE=1 SV=1	38	17	104
0.48402	-0.0260823	0.52845	0.317233	-0.451862	-0.19119	0.731899	-0.0275628	-0.143443	0.0126924	0.118377	0.423722	0.695171	0.0849213	0.402764	-0.261696	-1.48619	-1.08584	0.643622	-0.523395	0.745918	0.0408773	0.0620265	-0.558666	0.0933687	0.0969592	-1.14602	0.162365	-0.505271	-0.541383	0.681513	-0.612111	0.529721	0.334016	-0.598048	-1.11501	-0.774873	1.35776	-0.341752	0.0560969	1.55528	0.027843	0.267683	-0.418878	Q14982	Opioid-binding protein/cell adhesion molecule OS=Homo sapiens OX=9606 GN=OPCML PE=1 SV=1	>sp|Q14982|OPCM_HUMAN Opioid-binding protein/cell adhesion molecule OS=Homo sapiens OX=9606 GN=OPCML PE=1 SV=1	38	15	491
NaN	NaN	NaN	NaN	NaN	NaN	NaN	NaN	NaN	NaN	NaN	NaN	NaN	NaN	NaN	NaN	NaN	NaN	NaN	NaN	0.0420257	0.915669	4.17822	0.66838	0.777144	0.223402	-0.302883	-0.0728238	0.132269	-0.124345	NaN	NaN	NaN	NaN	NaN	NaN	NaN	NaN	NaN	NaN	0.977241	0.10538	0.267806	-1.34516	Q92874	Deoxyribonuclease-1-like 2 OS=Homo sapiens OX=9606 GN=DNASE1L2 PE=1 SV=1	>sp|Q92874|DNSL2_HUMAN Deoxyribonuclease-1-like 2 OS=Homo sapiens OX=9606 GN=DNASE1L2 PE=1 SV=1	4	1	4
0.499074	0.264889	0.142922	0.82582	0.157356	-0.382974	0.204713	-0.571415	0.177489	-0.239483	-0.527718	1.23418	-0.72663	1.31401	0.462404	-0.342164	-0.570764	-0.634271	0.640936	-0.840436	-0.29891	-0.788685	-1.18653	1.65552	0.0989246	0.0133762	-1.73005	-0.833781	-1.0256	0.113298	-0.161952	0.326391	0.0367185	-0.876378	-0.154192	-0.284596	-0.0388426	-0.486918	0.0586801	0.0311672	1.45688	0.0349235	0.267833	-0.451944	P0C6S8	Leucine-rich repeat and immunoglobulin-like domain-containing nogo receptor-interacting protein 3 OS=Homo sapiens OX=9606 GN=LINGO3 PE=3 SV=1	>sp|P0C6S8|LIGO3_HUMAN Leucine-rich repeat and immunoglobulin-like domain-containing nogo receptor-interacting protein 3 OS=Homo sapiens OX=9606 GN=LINGO3 PE=3 SV=1	18	8	30
0.103752	-0.000415855	0.0601696	0.138556	-0.0421365	-0.248562	0.280073	-0.417872	-0.0347705	0.59232	0.838361	0.321511	1.28879	0.0464217	1.13408	-0.420513	-0.442007	0.0118102	0.716511	-0.0219229	0.318419	0.0705833	-0.0287304	-0.35886	0.601591	-0.522622	-0.402733	0.0579214	-0.283216	-0.499661	0.027133	-1.50065	-0.451616	0.591534	-0.239901	-0.857264	-1.51786	-0.0922178	-0.524946	-0.562885	1.60501	0.0248305	0.268034	-0.405451	P78310	Coxsackievirus and adenovirus receptor OS=Homo sapiens OX=9606 GN=CXADR PE=1 SV=1	>sp|P78310|CXAR_HUMAN Coxsackievirus and adenovirus receptor OS=Homo sapiens OX=9606 GN=CXADR PE=1 SV=1	24	7	34
-2.31984	-3.26265	-3.42	-2.78321	-3.13524	-1.8407	-3.08697	5.53593	-2.42233	-1.50888	-4.87521	-6.2389	-5.9764	-6.43567	-5.96635	-6.04504	-4.33017	-5.7261	1.54977	-0.164119	-2.29165	2.07493	-4.06988	-3.74777	-4.83251	-4.13871	-3.42755	-4.25421	4.65831	-3.05568	-0.548353	2.04903	-1.78304	-1.84816	-3.36072	7.57854	-2.37644	-1.0151	-4.55269	-1.96999	0.950505	0.112071	0.26809	1.60897	A0A2R8Y7X9	Uncharacterized protein OS=Homo sapiens OX=9606 PE=3 SV=1	>tr|A0A2R8Y7X9|A0A2R8Y7X9_HUMAN Uncharacterized protein OS=Homo sapiens OX=9606 PE=3 SV=1	67	10	97
0.137159	0.579652	-1.13041	-0.941012	-0.564892	1.71752	0.386886	0.845657	-1.28682	0.429428	-1.33035	0.486189	-0.542003	-1.15284	0.706531	-0.117658	0.399074	2.81577	-0.910953	2.79503	0.162106	0.306539	0.612936	0.859223	1.14484	0.0812242	0.437696	-0.851781	-1.41448	1.92075	0.33815	-1.18811	-2.50504	-0.301652	1.6007	1.59853	1.46924	-1.57939	0.718104	1.81595	1.15845	0.069431	0.268101	0.699602	P36980	Complement factor H-related protein 2 OS=Homo sapiens OX=9606 GN=CFHR2 PE=1 SV=1	>sp|P36980|FHR2_HUMAN Complement factor H-related protein 2 OS=Homo sapiens OX=9606 GN=CFHR2 PE=1 SV=1	44	10	163
0.882141	-0.259901	1.01562	0.0406586	0.372161	-0.684586	0.811057	0.072375	-0.866645	0.953653	1.24983	0.779681	1.2837	-0.0734101	0.905188	-0.967962	-1.28222	-0.507891	0.596362	-1.09867	0.9736	0.152035	-0.0653959	-0.974074	0.464005	0.397083	-0.449243	0.741312	-0.821469	-1.56605	0.064586	-0.966601	0.347009	0.269824	-0.435875	-1.34836	-0.953967	1.09427	0.708164	0.859677	1.3407	0.0456352	0.268202	-0.516895	P55286	Cadherin-8 OS=Homo sapiens OX=9606 GN=CDH8 PE=2 SV=2	>sp|P55286|CADH8_HUMAN Cadherin-8 OS=Homo sapiens OX=9606 GN=CDH8 PE=2 SV=2	15	10	63
-1.05662	-0.601426	0.278685	-1.13944	-0.426839	-0.0148848	-0.153706	-0.386272	0.309281	-0.684952	-1.05722	-0.275021	-1.53741	-0.47408	-2.27281	-0.768001	-0.641598	-1.13137	-0.851669	0.807822	-4.10536	-5.06157	-3.82236	-4.05981	-5.17729	-3.74851	-4.82146	-3.21856	-1.46795	-0.450859	-0.915784	-1.39406	-1.50475	-0.180967	-0.238337	1.50032	0.0427505	-0.458408	-0.054767	-0.797194	1.06691	0.0857215	0.268258	0.901624	P08833	Insulin-like growth factor-binding protein 1 OS=Homo sapiens OX=9606 GN=IGFBP1 PE=1 SV=1	>sp|P08833|IBP1_HUMAN Insulin-like growth factor-binding protein 1 OS=Homo sapiens OX=9606 GN=IGFBP1 PE=1 SV=1	20	4	7
0.539911	-0.262638	0.685044	0.565433	0.782269	-0.804861	0.329807	-0.0932933	0.371864	-0.717022	-0.14386	0.600234	-0.0845824	0.967902	-0.0129575	-0.217442	0.180956	0.47515	0.248083	-0.116746	0.47792	-0.144922	0.43482	0.766089	0.223045	0.190859	-0.495384	0.180434	-0.0603421	0.257526	0.329365	0.997516	0.130365	-0.361268	-0.126156	-0.56979	-0.271525	-0.349509	0.449272	0.525169	1.88383	0.0130669	0.268432	-0.342516	P07711	Cathepsin L1 OS=Homo sapiens OX=9606 GN=CTSL PE=1 SV=2	>sp|P07711|CATL1_HUMAN Cathepsin L1 OS=Homo sapiens OX=9606 GN=CTSL PE=1 SV=2	47	11	210
0.593227	0.0965031	0.821986	0.281209	-0.30376	0.00601623	0.710359	0.00326669	-0.464916	0.0683061	0.117487	0.389546	0.915338	0.0591637	0.315316	-0.181726	-1.12423	-0.356627	0.65441	-0.621972	0.340178	-0.343614	-0.0869789	-0.293569	0.520547	0.120405	-1.03452	0.14235	-0.466603	-0.87883	0.715375	-0.233875	0.562617	0.038764	-0.71097	-1.13408	-0.77478	0.629592	0.0565282	0.586276	1.63752	0.0230396	0.268599	-0.392763	P51693	Amyloid-like protein 1 OS=Homo sapiens OX=9606 GN=APLP1 PE=1 SV=3	>sp|P51693|APLP1_HUMAN Amyloid-like protein 1 OS=Homo sapiens OX=9606 GN=APLP1 PE=1 SV=3	38	24	1455
1.00009	0.567813	0.503853	0.0672701	0.219749	-0.316256	0.492506	-0.554441	0.241022	-0.695647	-0.0163054	0.345826	0.00860022	0.153405	-0.0412626	-0.207456	-0.194642	0.173173	0.253975	-0.488327	0.557495	-0.46372	0.612876	1.30585	-0.0487306	0.306513	-0.450371	0.575086	-0.308946	0.610249	0.35276	1.09784	0.189786	-0.284595	-0.263862	-0.592596	-0.204955	-0.285128	0.301283	0.112208	1.8217	0.0150765	0.268747	-0.354874	P35052	Glypican-1 OS=Homo sapiens OX=9606 GN=GPC1 PE=1 SV=2	>sp|P35052|GPC1_HUMAN Glypican-1 OS=Homo sapiens OX=9606 GN=GPC1 PE=1 SV=2	56	24	195
0.465738	0.293944	0.555418	0.137688	-0.138241	0.00251819	0.244135	0.0257354	-0.0790246	0.628829	0.726561	0.703539	1.41619	0.310227	0.913676	-0.431076	-0.701732	-0.135023	0.52822	-0.583072	0.444269	-0.184892	0.289402	-0.158328	0.226542	0.291513	-0.651085	0.566106	-0.68211	-0.531515	0.23277	-0.499297	0.405519	0.222063	-0.367557	-0.958165	-0.475365	0.846548	0.514508	-0.0077309	1.70602	0.019678	0.26913	-0.379151	Q9P232	Contactin-3 OS=Homo sapiens OX=9606 GN=CNTN3 PE=1 SV=3	>sp|Q9P232|CNTN3_HUMAN Contactin-3 OS=Homo sapiens OX=9606 GN=CNTN3 PE=1 SV=3	36	31	177
NaN	NaN	NaN	NaN	NaN	NaN	NaN	NaN	NaN	NaN	-0.46158	0.194488	-0.524915	-0.493419	-0.259566	0.559928	0.558271	0.101778	-0.0873924	-0.19775	NaN	NaN	NaN	NaN	NaN	NaN	NaN	NaN	NaN	NaN	NaN	NaN	NaN	NaN	NaN	NaN	NaN	NaN	NaN	NaN	1.35227	0.0444352	0.269723	0.495965	Q96BM9	ADP-ribosylation factor-like protein 8A OS=Homo sapiens OX=9606 GN=ARL8A PE=1 SV=1	>sp|Q96BM9|ARL8A_HUMAN ADP-ribosylation factor-like protein 8A OS=Homo sapiens OX=9606 GN=ARL8A PE=1 SV=1	39	5	16
-0.186716	0.0292979	-0.488002	-0.186686	-1.0601	0.908638	-1.14852	0.710546	-0.231007	-0.473059	0.438857	-0.811539	-1.16143	-1.03935	-0.992959	-0.576393	0.206517	-0.377979	0.22211	-0.458297	-1.27421	0.468311	-0.529759	0.795598	-0.840088	-0.233535	0.729164	-1.13485	1.04038	1.96739	-0.761072	-0.959197	0.133266	-0.0269798	0.831234	1.20406	0.300071	0.903201	-0.110365	-1.03401	1.35217	0.0444457	0.27026	0.501779	P00488	Coagulation factor XIII A chain OS=Homo sapiens OX=9606 GN=F13A1 PE=1 SV=4	>sp|P00488|F13A_HUMAN Coagulation factor XIII A chain OS=Homo sapiens OX=9606 GN=F13A1 PE=1 SV=4	37	21	98
-0.454821	0.00319976	-1.26919	-1.09521	-0.774702	-0.338075	1.23202	-0.402381	0.584576	0.0764955	NaN	NaN	NaN	NaN	NaN	NaN	NaN	NaN	NaN	NaN	NaN	NaN	NaN	NaN	NaN	NaN	NaN	NaN	NaN	NaN	-0.603456	0.537172	-0.24389	0.836321	-0.307966	1.86976	-0.0873697	-0.566438	0.969201	-0.15484	1.19618	0.0636534	0.270388	0.655548	P13727	Bone marrow proteoglycan OS=Homo sapiens OX=9606 GN=PRG2 PE=1 SV=2	>sp|P13727|PRG2_HUMAN Bone marrow proteoglycan OS=Homo sapiens OX=9606 GN=PRG2 PE=1 SV=2	14	3	4
NaN	NaN	NaN	NaN	NaN	NaN	NaN	NaN	NaN	NaN	-3.77266	0.732348	-1.67855	0.550119	-1.4702	1.09031	-0.0468812	2.91338	-0.562917	2.5218	NaN	NaN	NaN	NaN	NaN	NaN	NaN	NaN	NaN	NaN	-0.000330902	1.91968	-0.859282	-4.38807	-1.38853	-1.17178	0.661863	-1.8568	-1.89731	2.10566	0.961224	0.109339	0.270622	1.41128	P27701	CD82 antigen OS=Homo sapiens OX=9606 GN=CD82 PE=1 SV=1	>sp|P27701|CD82_HUMAN CD82 antigen OS=Homo sapiens OX=9606 GN=CD82 PE=1 SV=1	4	1	3
NaN	NaN	NaN	NaN	NaN	NaN	NaN	NaN	NaN	NaN	NaN	NaN	NaN	NaN	NaN	NaN	NaN	NaN	NaN	NaN	-0.149868	0.00406206	-0.85979	-0.38913	-0.898874	-0.817605	-0.933917	-1.0554	-1.4011	-0.650132	NaN	NaN	NaN	NaN	NaN	NaN	NaN	NaN	NaN	NaN	1.30141	0.0499558	0.270895	-0.51291	O60443	Gasdermin-E OS=Homo sapiens OX=9606 GN=GSDME PE=1 SV=2	>sp|O60443|GSDME_HUMAN Gasdermin-E OS=Homo sapiens OX=9606 GN=GSDME PE=1 SV=2	4	1	2
0.413633	0.214448	-0.114168	0.188953	-0.430483	-0.490556	-0.171413	-0.408518	0.259722	-0.0462381	-0.633676	-0.131977	-0.00874388	0.0848463	-0.133205	-0.311763	-0.868728	-0.965752	0.10984	-0.730498	0.210872	-0.323378	0.358704	0.0373277	0.082161	0.111688	-0.208531	-0.134571	0.198421	-0.366502	1.22124	-0.0927383	1.19147	-0.141267	0.0916586	-0.612717	-0.374887	0.247824	0.121079	-0.109926	1.90063	0.0125711	0.271128	-0.341885	Q9H7Y0	Deleted in autism-related protein 1 OS=Homo sapiens OX=9606 GN=CXorf36 PE=2 SV=3	>sp|Q9H7Y0|DIA1R_HUMAN Deleted in autism-related protein 1 OS=Homo sapiens OX=9606 GN=CXorf36 PE=2 SV=3	28	10	58
0.667643	0.830827	0.831287	0.247331	-0.0626358	-0.200841	0.903779	-0.422748	-0.498487	-0.682128	-0.254213	0.484828	0.0558984	0.342957	-0.385207	0.317207	-0.864064	-0.237089	0.344174	-0.396535	0.976517	-0.412251	0.707346	1.03247	0.54797	0.608243	0.207171	0.503177	0.0794345	0.329935	0.989639	0.580531	0.74132	0.332653	0.129146	-0.26776	-0.185579	0.219579	0.14248	1.00073	1.73385	0.0184566	0.271298	-0.374168	Q08629	Testican-1 OS=Homo sapiens OX=9606 GN=SPOCK1 PE=1 SV=1	>sp|Q08629|TICN1_HUMAN Testican-1 OS=Homo sapiens OX=9606 GN=SPOCK1 PE=1 SV=1	51	19	237
0.835889	0.407005	0.760137	0.424849	-0.387888	0.248291	1.02902	-0.094423	-0.0341048	0.110072	0.407559	-0.0974821	0.367191	0.00944708	0.501916	-0.745141	-0.729486	-0.533295	-0.152316	-0.566304	0.574273	-0.0621449	0.344869	-0.0924348	0.555321	0.149401	-0.26535	0.42375	-0.696206	-0.0788951	0.672581	-0.17984	0.175555	0.50086	-0.0518318	-0.766656	-0.41865	0.836048	0.471103	0.324228	1.80991	0.0154915	0.271697	-0.357737	Q06418	Tyrosine-protein kinase receptor TYRO3 OS=Homo sapiens OX=9606 GN=TYRO3 PE=1 SV=1	>sp|Q06418|TYRO3_HUMAN Tyrosine-protein kinase receptor TYRO3 OS=Homo sapiens OX=9606 GN=TYRO3 PE=1 SV=1	17	8	55
0.41362	0.613743	0.370454	0.244229	-0.616499	0.137264	0.284193	0.30573	-0.115526	-0.133407	0.571817	0.182309	0.236436	-0.0302238	-0.225312	-0.109374	-0.882091	-0.207979	-0.017449	0.202571	0.593001	0.687198	0.36699	0.213024	0.960547	0.522244	0.446326	0.864588	0.598156	0.133687	1.85903	0.138926	1.42788	1.26736	0.312904	-0.335362	-0.494872	0.988746	-0.127622	-0.306335	1.66897	0.0214304	0.271882	-0.391697	P00338	L-lactate dehydrogenase A chain OS=Homo sapiens OX=9606 GN=LDHA PE=1 SV=2	>sp|P00338|LDHA_HUMAN L-lactate dehydrogenase A chain OS=Homo sapiens OX=9606 GN=LDHA PE=1 SV=2	39	12	114
-0.115564	-0.892617	0.710044	-0.266173	0.0617959	0.605617	0.607989	-0.101137	0.205171	-0.546729	NaN	NaN	NaN	NaN	NaN	NaN	NaN	NaN	NaN	NaN	0.845742	-0.0380838	-0.34228	0.394774	-0.0458367	0.59004	0.781452	-0.324778	-0.0792099	-0.221363	-1.57581	-1.55118	-1.40304	0.559396	-0.183148	0.699804	-0.392835	1.68961	0.699688	-0.0852785	1.33226	0.0465309	0.272047	0.531334	Q9UIB8	SLAM family member 5 OS=Homo sapiens OX=9606 GN=CD84 PE=1 SV=1	>sp|Q9UIB8|SLAF5_HUMAN SLAM family member 5 OS=Homo sapiens OX=9606 GN=CD84 PE=1 SV=1	15	4	8
0.428955	2.31386	-0.291649	-0.144611	-0.901583	-0.413504	1.02271	-0.404884	-0.718427	-0.636151	1.03375	-0.605808	-0.286783	0.0512144	-0.985009	-0.853419	-0.897602	-0.618689	-0.588727	0.239348	0.757464	0.18084	0.143037	-0.185694	1.20364	0.190461	-0.922285	0.35967	0.142903	-0.414865	0.998137	0.0611378	0.290826	0.437422	-0.307365	-0.482585	-0.646755	1.47433	-0.683288	-0.528089	1.38429	0.0412768	0.272375	-0.478581	Q96KN2	Beta-Ala-His dipeptidase OS=Homo sapiens OX=9606 GN=CNDP1 PE=1 SV=4	>sp|Q96KN2|CNDP1_HUMAN Beta-Ala-His dipeptidase OS=Homo sapiens OX=9606 GN=CNDP1 PE=1 SV=4	63	29	1499
-1.38451	-1.12479	-1.55576	-2.23827	-1.70524	-0.627039	-1.74985	4.22512	-1.23676	-1.10687	-1.42892	-2.52824	-2.6543	-2.53776	-2.87465	-2.49712	-1.7264	-2.15273	0.0933988	5.1941	-1.47623	3.16045	-2.19443	-1.75961	-0.118562	-1.51148	2.97401	-1.8677	3.55397	-1.53167	-1.54531	1.70958	0.502816	-0.327243	-1.52741	4.80271	-1.70227	-0.488198	-2.32031	-1.03071	1.01765	0.096017	0.272541	1.14513	P30043	Flavin reductase (NADPH) OS=Homo sapiens OX=9606 GN=BLVRB PE=1 SV=3	>sp|P30043|BLVRB_HUMAN Flavin reductase (NADPH) OS=Homo sapiens OX=9606 GN=BLVRB PE=1 SV=3	58	8	41
NaN	NaN	NaN	NaN	NaN	NaN	NaN	NaN	NaN	NaN	0.419723	-0.22682	0.999154	-0.517547	0.786838	-0.233902	-1.30979	-1.67625	0.724235	-1.025	NaN	NaN	NaN	NaN	NaN	NaN	NaN	NaN	NaN	NaN	NaN	NaN	NaN	NaN	NaN	NaN	NaN	NaN	NaN	NaN	1.04335	0.0905007	0.272543	-0.99641	Q8IV16	Glycosylphosphatidylinositol-anchored high density lipoprotein-binding protein 1 OS=Homo sapiens OX=9606 GN=GPIHBP1 PE=1 SV=2	>sp|Q8IV16|HDBP1_HUMAN Glycosylphosphatidylinositol-anchored high density lipoprotein-binding protein 1 OS=Homo sapiens OX=9606 GN=GPIHBP1 PE=1 SV=2	14	1	5
0.615865	0.413626	0.270571	0.263128	-0.324748	-0.032798	0.583354	-0.321197	0.076142	0.0123675	0.371585	0.403187	0.524347	0.296408	0.365616	-0.539995	-0.833028	-0.352511	0.435744	-0.463001	0.586145	-0.180178	0.275031	0.514301	0.616093	0.551677	-0.209478	0.914622	-0.158994	-0.130724	0.685562	-0.072586	0.344426	0.324169	-0.269712	-0.835556	-0.513584	0.702106	0.411065	-0.00812934	1.86516	0.0136409	0.274066	-0.336738	Q92859	Neogenin OS=Homo sapiens OX=9606 GN=NEO1 PE=1 SV=2	>sp|Q92859|NEO1_HUMAN Neogenin OS=Homo sapiens OX=9606 GN=NEO1 PE=1 SV=2	36	39	403
-0.458846	-0.396046	-2.04798	0.710563	-0.756736	0.508833	0.690527	0.337224	1.49216	0.681091	-0.705722	-2.2286	1.12484	-0.515205	0.92067	1.88693	1.61532	-1.93671	-0.149703	-0.488829	-0.969915	0.71206	0.331966	-0.381237	0.570937	-1.6182	0.806299	0.67665	1.35043	1.14025	1.49608	-0.710187	-0.758287	-1.12144	1.07024	1.47878	0.0230793	-1.22515	0.715516	0.524292	1.18904	0.0647084	0.27451	0.631081	Q02985	Complement factor H-related protein 3 OS=Homo sapiens OX=9606 GN=CFHR3 PE=1 SV=2	>sp|Q02985|FHR3_HUMAN Complement factor H-related protein 3 OS=Homo sapiens OX=9606 GN=CFHR3 PE=1 SV=2	41	9	95
-0.368239	0.483378	-1.37725	-0.506135	-1.0264	0.312509	-0.787293	-0.622923	0.0689855	0.324982	-0.269595	-1.60917	-0.455722	-1.22927	0.0844145	-0.458308	0.624678	0.0768054	-0.173934	0.0176161	-0.0357542	-0.390715	-0.85563	-1.05991	-1.18773	-1.68532	1.21557	-0.449083	-0.165482	2.41985	-0.905695	-0.84572	-0.00948347	0.923369	2.12305	1.23194	1.02568	-0.0757675	1.39521	-1.32994	1.23743	0.0578855	0.274793	0.574198	P27918	Properdin OS=Homo sapiens OX=9606 GN=CFP PE=1 SV=2	>sp|P27918|PROP_HUMAN Properdin OS=Homo sapiens OX=9606 GN=CFP PE=1 SV=2	17	6	32
0.731791	-0.0466818	0.520673	0.27482	-0.205727	-0.199268	0.550852	-0.65002	-0.246866	0.11505	-0.315224	0.957408	-0.269447	0.608938	0.234544	-0.932676	-0.777675	-0.0188737	0.259728	-0.394411	1.12684	-0.451296	0.547199	0.316059	0.547662	0.601417	-0.507486	0.985558	-0.200695	0.16516	0.749553	0.170586	0.282672	-0.261278	0.0243204	-0.528008	-0.171486	-0.0867065	0.715131	-0.522058	1.67734	0.0210214	0.275089	-0.369337	Q9P0K1	Disintegrin and metalloproteinase domain-containing protein 22 OS=Homo sapiens OX=9606 GN=ADAM22 PE=1 SV=1	>sp|Q9P0K1|ADA22_HUMAN Disintegrin and metalloproteinase domain-containing protein 22 OS=Homo sapiens OX=9606 GN=ADAM22 PE=1 SV=1	34	24	196
NaN	NaN	NaN	NaN	NaN	NaN	NaN	NaN	NaN	NaN	0.210024	0.833044	-0.622437	0.102506	-0.070664	0.170579	0.235233	-0.46035	-0.746298	-1.54464	0.795656	0.239818	1.15103	0.357493	0.665483	0.156389	0.231699	0.288612	-0.0238711	0.155027	NaN	NaN	NaN	NaN	NaN	NaN	NaN	NaN	NaN	NaN	1.29102	0.0511664	0.275157	-0.519957	Q16549	Proprotein convertase subtilisin/kexin type 7 OS=Homo sapiens OX=9606 GN=PCSK7 PE=1 SV=2	>sp|Q16549|PCSK7_HUMAN Proprotein convertase subtilisin/kexin type 7 OS=Homo sapiens OX=9606 GN=PCSK7 PE=1 SV=2	5	2	5
0.632212	0.619162	0.507655	0.351012	-0.333641	-0.0372745	0.540534	-0.550135	-0.450862	-0.207038	-0.00663305	1.1475	-0.534781	0.891045	0.30978	0.638127	-1.37248	-0.943749	-0.00121904	-0.530621	0.830579	-0.382235	0.784697	0.228983	0.907795	0.120372	0.414006	0.262598	0.811277	0.670715	0.773008	-0.406207	0.966042	-0.0722207	-0.00184447	-0.286196	-0.229707	0.532036	0.00245816	-0.11366	1.57429	0.0266508	0.275379	-0.397136	P43121	Cell surface glycoprotein MUC18 OS=Homo sapiens OX=9606 GN=MCAM PE=1 SV=2	>sp|P43121|MUC18_HUMAN Cell surface glycoprotein MUC18 OS=Homo sapiens OX=9606 GN=MCAM PE=1 SV=2	46	23	384
0.316656	-0.0442029	0.449647	0.94005	1.08169	0.00998164	0.608117	0.225199	0.798473	-0.828478	0.424815	0.576983	0.240282	0.293019	0.377864	0.0907896	0.0400802	0.400016	-0.794943	-0.303674	0.402597	0.409488	0.49728	0.581498	0.0944166	0.88086	-0.105165	0.307165	-0.325752	-0.258348	-0.162453	1.69361	0.36376	0.152387	-0.271819	0.155591	0.260483	-0.415088	0.0594263	0.536684	1.73781	0.0182889	0.275401	-0.353807	P98095	Fibulin-2 OS=Homo sapiens OX=9606 GN=FBLN2 PE=1 SV=2	>sp|P98095|FBLN2_HUMAN Fibulin-2 OS=Homo sapiens OX=9606 GN=FBLN2 PE=1 SV=2	37	29	266
6.96323	2.27911	1.18298	-0.360281	-1.12363	-1.03162	-1.25354	0.990315	-1.41949	-0.857356	NaN	NaN	NaN	NaN	NaN	NaN	NaN	NaN	NaN	NaN	NaN	NaN	NaN	NaN	NaN	NaN	NaN	NaN	NaN	NaN	NaN	NaN	NaN	NaN	NaN	NaN	NaN	NaN	NaN	NaN	0.882216	0.131155	0.275482	-2.50262	P16402	Histone H1.3 OS=Homo sapiens OX=9606 GN=HIST1H1D PE=1 SV=2	>sp|P16402|H13_HUMAN Histone H1.3 OS=Homo sapiens OX=9606 GN=HIST1H1D PE=1 SV=2	18	4	11
-2.51813	-0.909298	-1.54748	-1.46256	-0.0847402	-1.76225	1.04361	0.247974	1.08236	1.80107	1.82664	2.20884	-0.176443	0.824458	0.517987	1.43287	1.34674	-1.11464	-1.28658	-0.556909	-1.74866	-0.921837	-0.672294	2.64096	-3.80756	-3.05371	0.994888	0.0432657	0.526595	1.73525	-1.57805	-0.231039	-0.68497	0.0755074	-0.509172	2.58008	0.590529	0.485837	1.68224	-0.111111	1.06789	0.0855292	0.275625	0.823298	P80748	Immunoglobulin lambda variable 3-21 OS=Homo sapiens OX=9606 GN=IGLV3-21 PE=1 SV=2	>sp|P80748|LV321_HUMAN Immunoglobulin lambda variable 3-21 OS=Homo sapiens OX=9606 GN=IGLV3-21 PE=1 SV=2	23	2	77
0.352683	0.124641	0.671298	0.151216	0.146843	0.0499721	0.224795	0.376478	0.141575	-0.494769	0.364576	-0.0822151	0.169069	-0.169711	0.196574	0.14179	0.679019	0.256427	0.445708	0.850787	1.38067	2.36308	0.519639	1.28112	1.32165	-0.301804	-0.0604082	-0.277212	-0.680509	-0.622976	0.923941	-0.127754	0.403382	-0.338748	-0.250206	-0.349975	-0.0598581	0.51261	-0.0961063	0.491298	1.5377	0.0289937	0.275923	-0.408745	P68036	Ubiquitin-conjugating enzyme E2 L3 OS=Homo sapiens OX=9606 GN=UBE2L3 PE=1 SV=1	>sp|P68036|UB2L3_HUMAN Ubiquitin-conjugating enzyme E2 L3 OS=Homo sapiens OX=9606 GN=UBE2L3 PE=1 SV=1	73	10	58
-0.22317	0.428291	1.1981	1.46848	0.945715	-0.32384	-1.07881	0.674433	1.2356	-1.30818	-0.273125	0.902755	-1.02744	0.960889	-0.397356	0.933095	1.37418	1.60884	-1.12823	-0.554669	1.88415	0.598494	1.36893	0.225477	1.51092	0.221911	0.356036	0.110349	-1.69991	-0.238641	-0.405904	2.58112	0.667155	-0.922465	1.39842	-0.968303	0.287411	-1.20106	0.512847	1.86902	1.19479	0.0638573	0.275968	-0.610368	Q9UBX7	Kallikrein-11 OS=Homo sapiens OX=9606 GN=KLK11 PE=1 SV=2	>sp|Q9UBX7|KLK11_HUMAN Kallikrein-11 OS=Homo sapiens OX=9606 GN=KLK11 PE=1 SV=2	50	9	81
0.332146	0.143575	0.76826	0.635649	0.0976983	0.192325	0.696867	0.0228278	-0.747025	-0.686029	-0.0450371	0.325355	0.263099	0.491555	0.415116	0.491328	-0.349471	-0.0337179	0.149903	0.611395	0.0377338	0.264566	0.328333	0.0749549	0.870613	0.571056	-0.0998608	0.480683	0.185569	-0.1459	1.90294	-0.0410003	1.27614	-0.0920075	0.064911	-0.771892	-0.288781	0.622736	-0.255502	0.186698	1.67465	0.021152	0.278383	-0.364069	P09972	Fructose-bisphosphate aldolase C OS=Homo sapiens OX=9606 GN=ALDOC PE=1 SV=2	>sp|P09972|ALDOC_HUMAN Fructose-bisphosphate aldolase C OS=Homo sapiens OX=9606 GN=ALDOC PE=1 SV=2	74	23	386
0.730713	0.607717	0.872506	0.388809	-0.488576	0.289642	1.24368	-0.0204311	-0.676303	0.355531	0.614235	0.396502	0.658251	0.58105	0.97273	-0.527874	-1.76461	-1.52138	1.04829	-0.249382	0.53943	0.248528	-0.0108969	-0.131842	1.03121	0.442698	0.0563162	0.818286	0.525218	-0.837588	0.971774	-0.864412	0.516887	0.375965	0.00898682	-0.761363	-0.857949	1.31039	-0.027476	-0.121407	1.3774	0.0419369	0.278528	-0.464764	A0A087WWT2	Neuritin OS=Homo sapiens OX=9606 GN=NRN1 PE=1 SV=1	>tr|A0A087WWT2|A0A087WWT2_HUMAN Neuritin OS=Homo sapiens OX=9606 GN=NRN1 PE=1 SV=1	29	3	33
0.545098	0.592181	0.855193	0.505441	-0.440438	-0.227441	0.814844	-0.0398592	-0.600608	0.363248	0.617725	-0.0454955	1.30347	0.272826	0.41971	0.229095	-1.10652	-0.78604	0.851815	-0.496488	0.702127	0.427524	0.193385	0.0706511	0.495964	0.515082	-0.269406	0.550388	0.66444	-0.517342	0.826146	-0.459478	1.19039	0.891783	0.133439	-0.375963	-0.37666	1.35333	0.323802	0.250345	1.53577	0.0291223	0.278828	-0.398879	Q92520	Protein FAM3C OS=Homo sapiens OX=9606 GN=FAM3C PE=1 SV=1	>sp|Q92520|FAM3C_HUMAN Protein FAM3C OS=Homo sapiens OX=9606 GN=FAM3C PE=1 SV=1	68	16	859
0.206635	-0.0789297	-0.324783	-0.452614	-0.596761	0.315702	-0.0831359	0.251891	0.150612	-0.404983	0.3477	-1.62286	-0.840841	-1.16763	-0.971828	-1.41231	-0.510969	-1.06052	-0.646882	1.02322	-0.00851405	-0.425352	-0.542514	-0.307947	-1.02776	-0.536756	0.59229	0.21144	0.204504	0.584339	-0.41073	-1.03625	-0.15861	0.377067	-0.0472948	0.0947018	-0.67365	0.228062	0.0208231	0.714911	1.50326	0.031386	0.27934	0.407656	P31946	14-3-3 protein beta/alpha OS=Homo sapiens OX=9606 GN=YWHAB PE=1 SV=3	>sp|P31946|1433B_HUMAN 14-3-3 protein beta/alpha OS=Homo sapiens OX=9606 GN=YWHAB PE=1 SV=3	50	10	92
0.573314	0.574865	0.125727	-0.129174	-0.472548	0.325947	0.451397	-0.267559	-0.24793	0.442985	0.563908	0.405021	0.509566	0.163077	0.670156	-0.511347	-0.764499	0.0263802	0.607714	-0.509714	0.796613	-0.270467	0.309407	0.269787	0.509468	0.468533	-0.0792056	0.400566	-0.343754	0.0259146	0.899293	0.0465349	0.641749	0.284077	-0.054996	-0.854639	-0.216394	0.898413	-0.536539	0.263385	1.77939	0.0166191	0.279481	-0.341786	P23470	Receptor-type tyrosine-protein phosphatase gamma OS=Homo sapiens OX=9606 GN=PTPRG PE=1 SV=4	>sp|P23470|PTPRG_HUMAN Receptor-type tyrosine-protein phosphatase gamma OS=Homo sapiens OX=9606 GN=PTPRG PE=1 SV=4	11	12	68
-0.0257543	-0.320526	0.295254	0.443838	0.406112	0.436864	0.00753252	-0.0955161	0.0969089	0.6824	NaN	NaN	NaN	NaN	NaN	NaN	NaN	NaN	NaN	NaN	NaN	NaN	NaN	NaN	NaN	NaN	NaN	NaN	NaN	NaN	2.07308	0.925701	1.98638	0.658866	0.698149	0.725718	-0.309099	0.377912	-0.906098	0.337386	1.20163	0.0628591	0.279759	-0.578709	P54760	Ephrin type-B receptor 4 OS=Homo sapiens OX=9606 GN=EPHB4 PE=1 SV=2	>sp|P54760|EPHB4_HUMAN Ephrin type-B receptor 4 OS=Homo sapiens OX=9606 GN=EPHB4 PE=1 SV=2	9	6	11
-0.493247	0.201706	-1.64755	-1.19849	-1.96784	-0.240392	-0.983864	-1.06246	1.29468	0.914646	1.19534	-1.64281	-1.16556	-1.47306	-0.452844	0.114111	0.816352	0.867431	0.915731	0.172976	-1.74672	-0.297874	-0.830175	-0.352008	-1.72248	-1.63644	0.27352	-0.959439	-0.656136	3.11187	-1.43665	-0.616373	0.0632634	1.07384	2.83636	1.51716	0.227831	-0.918664	0.367585	-1.91325	1.11498	0.0767397	0.280052	0.694821	P15169	Carboxypeptidase N catalytic chain OS=Homo sapiens OX=9606 GN=CPN1 PE=1 SV=1	>sp|P15169|CBPN_HUMAN Carboxypeptidase N catalytic chain OS=Homo sapiens OX=9606 GN=CPN1 PE=1 SV=1	25	9	55
NaN	NaN	NaN	NaN	NaN	NaN	NaN	NaN	NaN	NaN	-0.931318	-0.906002	-1.00043	-0.843898	-2.23347	-0.543759	-0.0999759	-0.921675	1.16074	0.176923	-0.525436	-0.369324	-0.609484	-0.108013	-0.72159	-0.736828	-0.698488	-0.599312	-0.758803	4.7713	NaN	NaN	NaN	NaN	NaN	NaN	NaN	NaN	NaN	NaN	1.00149	0.0996584	0.280064	0.999908	J3KNB4	Cathelicidin antimicrobial peptide OS=Homo sapiens OX=9606 GN=CAMP PE=1 SV=1	>tr|J3KNB4|J3KNB4_HUMAN Cathelicidin antimicrobial peptide OS=Homo sapiens OX=9606 GN=CAMP PE=1 SV=1	10	2	3
NaN	NaN	NaN	NaN	NaN	NaN	NaN	NaN	NaN	NaN	0.0666181	-0.0213884	0.492106	-0.731085	0.228389	1.033	1.06197	0.778434	-0.914879	1.49398	0.51143	-0.0440599	0.763174	0.753111	0.657176	1.56228	1.40068	1.01514	0.0405198	0.532674	-0.831997	-0.149996	0.368012	0.00909331	0.563179	0.552367	0.37677	-0.0992868	0.24244	0.416309	1.37813	0.0418671	0.280379	0.457242	Q92935	Exostosin-like 1 OS=Homo sapiens OX=9606 GN=EXTL1 PE=2 SV=2	>sp|Q92935|EXTL1_HUMAN Exostosin-like 1 OS=Homo sapiens OX=9606 GN=EXTL1 PE=2 SV=2	6	3	6
1.16483	0.599263	0.122743	-0.188998	-0.0676123	0.618087	-0.159441	2.4736	-0.133838	0.145726	-0.939705	-1.55984	-1.9061	-1.36885	0.522975	-0.194816	-0.770451	-0.28098	1.02103	3.62276	-0.726335	-0.326492	-1.69835	-0.494589	-0.721027	-1.14817	-0.460551	-1.38454	0.233495	-0.96507	-1.08736	-0.298122	-0.345369	0.566955	-0.42136	2.19183	-0.307785	0.899696	-1.15154	-0.597096	1.14612	0.0714296	0.281621	0.641265	J3KQE5	GTP-binding nuclear protein Ran (Fragment) OS=Homo sapiens OX=9606 GN=RAN PE=1 SV=1	>tr|J3KQE5|J3KQE5_HUMAN GTP-binding nuclear protein Ran (Fragment) OS=Homo sapiens OX=9606 GN=RAN PE=1 SV=1	10	2	8
0.376589	0.644837	-0.627749	-2.74106	0.370442	2.08865	-0.0320477	-1.41513	0.885231	1.55185	-0.0643243	0.422087	-0.646386	0.0637656	-0.550742	1.75443	0.805176	-1.17648	-0.73657	-1.38661	-1.17267	0.592922	-1.30677	-0.993584	-1.83709	-0.327158	0.784703	-3.5276	0.997001	0.749013	-0.557308	-2.72353	-1.68157	-0.61922	0.493274	1.67724	0.0897423	1.00291	0.506393	-2.35433	1.09419	0.0805019	0.281917	0.724725	P01602	Immunoglobulin kappa variable 1-5 OS=Homo sapiens OX=9606 GN=IGKV1-5 PE=1 SV=2	>sp|P01602|KV105_HUMAN Immunoglobulin kappa variable 1-5 OS=Homo sapiens OX=9606 GN=IGKV1-5 PE=1 SV=2	27	3	61
0.787868	-0.130875	0.174366	0.2012	1.57183	-1.38781	-0.275809	-0.0900636	0.608872	-1.59672	-0.140476	0.775848	-0.467491	1.74175	-0.551944	0.00313487	0.344336	1.12363	0.967634	0.349573	1.10226	-0.449332	0.695795	0.538068	0.152468	0.107254	-0.27512	0.175003	-0.310949	-0.113477	0.596484	2.46111	0.0862367	-0.203135	-0.052973	-0.506967	0.192809	-1.02385	0.745749	0.129535	1.31627	0.0482762	0.282124	-0.486114	Q8NHP8	Putative phospholipase B-like 2 OS=Homo sapiens OX=9606 GN=PLBD2 PE=1 SV=2	>sp|Q8NHP8|PLBL2_HUMAN Putative phospholipase B-like 2 OS=Homo sapiens OX=9606 GN=PLBD2 PE=1 SV=2	20	11	50
0.741098	-0.188631	0.752686	0.342912	0.170881	-0.222188	0.090175	-0.0487211	-0.181499	-0.208816	0.184733	0.536189	0.470905	0.641846	0.632802	0.0900749	-0.736495	0.445132	0.306846	-0.585124	0.489702	-0.380732	0.375602	0.272597	0.0189249	0.472114	-0.497698	0.576722	-0.251878	-0.387577	0.279032	0.265623	0.347949	0.255658	-0.17454	0.324055	-0.405073	0.251674	0.410156	0.480241	1.98795	0.0102814	0.282941	-0.305656	Q99784	Noelin OS=Homo sapiens OX=9606 GN=OLFM1 PE=1 SV=4	>sp|Q99784|NOE1_HUMAN Noelin OS=Homo sapiens OX=9606 GN=OLFM1 PE=1 SV=4	30	11	85
0.829727	0.0168281	0.986254	0.473882	-0.481738	-0.153731	0.564227	0.0941308	-0.531022	0.15138	-0.469308	0.56393	1.07816	0.168204	0.762057	-0.545863	-1.43677	-0.652072	0.39101	-0.446792	0.267479	-0.0856006	-0.291607	-0.426759	0.429987	0.233768	-0.758591	0.302189	-0.810134	-1.00947	0.104322	-0.491155	0.517151	0.000326924	-0.357827	-0.79744	-0.621541	1.26499	0.172739	0.0541338	1.48511	0.0327258	0.28333	-0.406459	O60241	Adhesion G protein-coupled receptor B2 OS=Homo sapiens OX=9606 GN=ADGRB2 PE=1 SV=2	>sp|O60241|AGRB2_HUMAN Adhesion G protein-coupled receptor B2 OS=Homo sapiens OX=9606 GN=ADGRB2 PE=1 SV=2	3	5	83
0.179594	0.449636	1.04854	0.0855075	0.463135	-0.0790331	0.563014	1.02704	-0.141326	0.334867	0.623968	0.834033	0.702857	1.10276	0.797314	0.242202	-0.163904	0.01516	1.92225	0.153985	0.677413	0.673504	1.21259	1.74632	2.4713	1.48519	0.469584	0.816005	0.450955	-0.00831129	1.0922	0.0229442	0.894505	0.33716	0.15716	-0.505678	-0.063743	1.00845	-0.901299	0.389319	1.42925	0.0372174	0.28337	-0.427886	P17900	Ganglioside GM2 activator OS=Homo sapiens OX=9606 GN=GM2A PE=1 SV=4	>sp|P17900|SAP3_HUMAN Ganglioside GM2 activator OS=Homo sapiens OX=9606 GN=GM2A PE=1 SV=4	63	12	131
0.231432	-0.137546	0.420383	0.162092	-0.587198	-0.239906	0.0365056	-0.348722	-0.326826	0.21953	0.304331	0.580114	0.353059	0.332756	0.502394	0.0963	-0.0756406	0.308945	0.0682719	-0.170684	0.593143	0.195806	0.506324	0.674257	0.14178	0.437719	-0.0620267	0.172301	-0.0673792	-0.352797	0.194465	-0.694703	0.52529	0.394786	0.209458	-0.359562	-0.156825	0.38188	0.113509	-0.470703	2.15707	0.00696513	0.284141	-0.284927	Q8WYK1	Contactin-associated protein-like 5 OS=Homo sapiens OX=9606 GN=CNTNAP5 PE=2 SV=1	>sp|Q8WYK1|CNTP5_HUMAN Contactin-associated protein-like 5 OS=Homo sapiens OX=9606 GN=CNTNAP5 PE=2 SV=1	17	17	94
-0.150845	-0.280456	0.5431	0.329114	0.326185	0.0675055	0.610259	0.0288985	0.650241	-0.00690972	-0.431604	1.15632	-0.258606	0.690193	0.510846	1.09496	1.02516	1.41974	0.462552	0.373432	0.688597	-0.136529	0.875871	0.140809	0.525331	1.00665	0.710535	0.589261	-0.0486869	0.54277	-0.140493	0.551601	-0.331917	-0.45796	0.0297269	0.506842	1.07746	-0.217972	0.756695	0.513254	1.68885	0.0204717	0.284224	0.349168	Q9UJH8	Meteorin OS=Homo sapiens OX=9606 GN=METRN PE=2 SV=2	>sp|Q9UJH8|METRN_HUMAN Meteorin OS=Homo sapiens OX=9606 GN=METRN PE=2 SV=2	22	5	29
-1.28059	-0.571431	-0.914393	-0.722819	-0.791854	0.230475	-0.393532	-0.799352	-0.683962	-0.155816	NaN	NaN	NaN	NaN	NaN	NaN	NaN	NaN	NaN	NaN	NaN	NaN	NaN	NaN	NaN	NaN	NaN	NaN	NaN	NaN	NaN	NaN	NaN	NaN	NaN	NaN	NaN	NaN	NaN	NaN	1.25922	0.0550531	0.284255	0.49578	Q13724	Mannosyl-oligosaccharide glucosidase OS=Homo sapiens OX=9606 GN=MOGS PE=1 SV=5	>sp|Q13724|MOGS_HUMAN Mannosyl-oligosaccharide glucosidase OS=Homo sapiens OX=9606 GN=MOGS PE=1 SV=5	4	3	4
0.322643	1.51186	-0.790084	0.85372	0.10528	-0.161839	-0.533992	0.0499675	0.736267	1.82613	0.0925091	0.0118971	-0.812752	-0.601828	-0.841146	0.0155185	0.197542	0.802129	-0.915826	-0.20515	-0.814663	-0.220249	-0.543284	-0.566016	-1.29855	-0.720415	-0.415917	-0.229433	-0.30619	3.43484	-0.62685	0.0787443	-1.41916	0.218986	0.796892	0.646259	0.460104	0.156829	0.616071	0.714161	1.23374	0.0583796	0.284491	0.535455	A0A0B4J2H0	Immunoglobulin heavy variable 1-69D OS=Homo sapiens OX=9606 GN=IGHV1-69D PE=3 SV=1	>sp|A0A0B4J2H0|HV69D_HUMAN Immunoglobulin heavy variable 1-69D OS=Homo sapiens OX=9606 GN=IGHV1-69D PE=3 SV=1	67	5	91
-0.0121511	0.153486	0.395994	0.373906	1.1651	0.285112	-0.0250213	0.198589	1.03301	-0.465478	0.630788	-0.15416	0.464813	0.372692	0.143876	0.425046	0.253496	-0.663357	0.302946	-0.446146	0.477675	0.343368	-0.208455	0.839779	0.108904	0.549701	0.348011	0.154094	-0.155661	1.31625	0.948912	0.635624	0.298476	2.12978	0.418447	0.759335	-0.539991	-0.930721	-0.0571094	-0.706004	1.50402	0.0313314	0.284516	-0.394538	Q68BL8	Olfactomedin-like protein 2B OS=Homo sapiens OX=9606 GN=OLFML2B PE=2 SV=2	>sp|Q68BL8|OLM2B_HUMAN Olfactomedin-like protein 2B OS=Homo sapiens OX=9606 GN=OLFML2B PE=2 SV=2	10	6	18
-0.137132	-0.155333	-1.7797	-0.594385	-0.630678	-0.281465	-1.06269	-0.909149	1.19981	1.40363	0.620474	-2.63128	-0.34767	-0.920281	0.29969	-0.0194488	0.803059	1.31721	0.123063	1.16992	-1.39844	-0.280987	-1.19157	-0.114842	-1.18128	-1.60309	0.309864	-0.0929654	-0.0320623	1.57742	-0.661832	0.296658	0.212356	0.447955	1.93158	1.08366	0.782909	-1.29506	0.388307	-1.28829	1.16983	0.067635	0.284525	0.589566	P13671	Complement component C6 OS=Homo sapiens OX=9606 GN=C6 PE=1 SV=3	>sp|P13671|CO6_HUMAN Complement component C6 OS=Homo sapiens OX=9606 GN=C6 PE=1 SV=3	51	39	437
0.457081	-1.2512	-1.55904	-1.69815	-1.55958	-2.56656	-1.16939	-1.49025	0.861818	-1.08578	-0.954739	-0.971179	-2.12337	-1.02067	0.336565	-0.400589	0.969402	0.1699	0.614182	1.68094	-1.35515	-1.79611	-2.00207	0.119054	-1.08181	-1.94234	1.72751	0.7084	0.525561	4.74105	-1.90658	-0.556167	-1.11027	-1.81828	4.10264	2.23026	0.292807	-1.50533	-2.49144	-2.08362	1.01122	0.0974506	0.284742	0.876778	P00739	Haptoglobin-related protein OS=Homo sapiens OX=9606 GN=HPR PE=2 SV=2	>sp|P00739|HPTR_HUMAN Haptoglobin-related protein OS=Homo sapiens OX=9606 GN=HPR PE=2 SV=2	64	22	846
1.03933	0.917588	0.974194	0.865995	-0.336137	-0.830366	0.997737	-0.344599	-0.062176	-0.5119	-0.926413	0.497492	0.445346	0.406359	0.205065	-0.140123	-1.66802	-0.452655	0.938941	-0.666719	0.841166	-0.630264	1.03133	1.12683	1.01122	0.256261	-0.661328	0.932419	0.291958	0.991764	0.604709	0.342692	0.349659	-0.927319	-0.597417	-0.928801	-0.712701	0.107324	0.426698	0.0197948	1.33832	0.0458864	0.284812	-0.462896	P52803	Ephrin-A5 OS=Homo sapiens OX=9606 GN=EFNA5 PE=1 SV=1	>sp|P52803|EFNA5_HUMAN Ephrin-A5 OS=Homo sapiens OX=9606 GN=EFNA5 PE=1 SV=1	40	6	47
NaN	NaN	NaN	NaN	NaN	NaN	NaN	NaN	NaN	NaN	-0.270531	-0.515922	0.74126	-0.1667	0.356045	-0.262351	-0.741694	-0.606398	0.260746	0.0229223	0.694627	1.45527	1.29971	1.22848	0.659297	0.593175	-0.531148	2.27108	-0.448897	-0.330974	1.07324	-0.589092	0.435027	0.914694	1.24471	-0.097854	-0.949126	1.15882	0.727229	-0.779873	1.20253	0.0627289	0.284824	-0.551629	P22794	Protein EVI2A OS=Homo sapiens OX=9606 GN=EVI2A PE=2 SV=2	>sp|P22794|EVI2A_HUMAN Protein EVI2A OS=Homo sapiens OX=9606 GN=EVI2A PE=2 SV=2	11	3	10
-0.7976	0.599467	-0.63162	0.0557175	-0.182423	0.741079	-0.0290524	0.129883	0.790872	-0.00963599	-0.599336	-0.481518	-0.298698	-0.707078	-0.974892	-0.452254	0.309689	-0.236513	-0.400478	0.251692	-0.956912	0.455493	-0.521707	-0.589646	-1.04047	-0.379491	-0.636618	-0.620735	-0.552641	0.707286	-0.978949	-0.314877	-0.822219	-0.398838	-0.831291	0.225353	-0.794384	-0.703676	-0.592672	-0.563054	1.61956	0.0240127	0.28503	0.360102	P10153	Non-secretory ribonuclease OS=Homo sapiens OX=9606 GN=RNASE2 PE=1 SV=2	>sp|P10153|RNAS2_HUMAN Non-secretory ribonuclease OS=Homo sapiens OX=9606 GN=RNASE2 PE=1 SV=2	19	2	14
0.720516	-0.67369	0.537977	-0.112226	2.05122	-0.562646	-0.272344	-0.221996	1.01368	-1.11366	1.34701	1.43537	0.420265	1.46794	-0.0250015	0.992534	1.57378	2.98571	0.617418	0.919035	1.83068	1.09069	1.07866	2.02843	1.20261	0.690872	0.828163	0.793452	-0.0677846	0.345194	0.465391	2.63208	0.32689	1.21092	0.248674	0.145532	0.176452	-1.5049	-0.211242	1.05941	1.21152	0.0614438	0.285128	-0.554887	P38571	Lysosomal acid lipase/cholesteryl ester hydrolase OS=Homo sapiens OX=9606 GN=LIPA PE=1 SV=2	>sp|P38571|LICH_HUMAN Lysosomal acid lipase/cholesteryl ester hydrolase OS=Homo sapiens OX=9606 GN=LIPA PE=1 SV=2	24	7	35
-1.39436	-1.28075	-1.09625	-1.13301	-0.32895	-1.18383	6.477	0.487091	-0.457797	0.239944	-1.04826	-1.32869	-1.8153	-2.23131	-1.56627	-1.76767	-0.673555	-1.6147	-1.41468	-0.714809	0.000844625	-0.0363636	1.29491	-0.352174	-0.257497	-0.0254623	-0.439307	-0.346036	0.0744323	0.316474	-0.948051	-1.24789	-0.746779	-1.02277	-0.546507	-0.0104605	-0.936833	-1.1058	0.26342	0.481014	1.06409	0.086279	0.285147	0.736693	Q6ZU80	Centrosomal protein of 128 kDa OS=Homo sapiens OX=9606 GN=CEP128 PE=1 SV=2	>sp|Q6ZU80|CE128_HUMAN Centrosomal protein of 128 kDa OS=Homo sapiens OX=9606 GN=CEP128 PE=1 SV=2	2	2	6
-0.803777	1.03378	-1.75691	-0.267374	0.380416	1.11052	0.314337	-0.788121	2.13072	1.76368	1.44731	-1.31358	-0.106697	-1.10521	1.56041	1.02892	1.25956	0.796426	-0.757927	0.501532	0.18673	-0.914874	0.972916	-0.0298767	0.129217	0.346808	1.68101	1.08908	2.11474	0.822844	-0.194296	-0.494447	1.88057	2.26396	3.23329	1.53128	0.96014	1.70514	1.71106	-0.454489	1.12172	0.0755573	0.285264	0.638285	A0A0U1RQE8	Putative glycine N-acyltransferase-like protein 1B OS=Homo sapiens OX=9606 GN=GLYATL1B PE=3 SV=1	>sp|A0A0U1RQE8|GLYLB_HUMAN Putative glycine N-acyltransferase-like protein 1B OS=Homo sapiens OX=9606 GN=GLYATL1B PE=3 SV=1	2	1	10
0.341698	-1.9228	-1.30904	-0.453831	0.332564	3.2066	-0.17691	0.357828	0.133867	-0.229109	-1.30391	-0.540826	-1.27759	-0.634484	-0.281378	-2.06957	1.04153	0.486276	-0.427895	-1.02439	-2.69915	0.600048	2.97468	0.53372	-1.89864	-1.48321	0.585654	0.595753	-0.114302	1.97163	-0.648071	-0.634921	-2.72293	1.78811	-0.985203	2.31155	1.43209	-2.30361	0.794843	-0.528309	1.0438	0.0904059	0.285435	0.765113	A0A075B7E8	Immunoglobulin heavy variable 3/OR16-13 (non-functional) (Fragment) OS=Homo sapiens OX=9606 GN=IGHV3OR16-13 PE=1 SV=1	>tr|A0A075B7E8|A0A075B7E8_HUMAN Immunoglobulin heavy variable 3/OR16-13 (non-functional) (Fragment) OS=Homo sapiens OX=9606 GN=IGHV3OR16-13 PE=1 SV=1	29	5	115
0.363407	0.447209	-0.00893338	0.266393	-0.385693	-0.484867	0.227092	-0.775969	-0.0537671	-0.539439	-0.165763	0.409326	-0.209463	0.175576	0.271069	-0.130937	-0.851176	-0.216534	0.239533	0.0550359	0.596211	-0.360775	0.496775	0.5084	0.587528	0.367538	-0.213847	0.905653	0.127568	0.47481	1.5127	0.0337459	0.918626	0.443788	0.355702	-0.417264	-0.388516	0.164765	0.756418	0.0850222	1.66863	0.0214474	0.285778	-0.346235	P09104	Gamma-enolase OS=Homo sapiens OX=9606 GN=ENO2 PE=1 SV=3	>sp|P09104|ENOG_HUMAN Gamma-enolase OS=Homo sapiens OX=9606 GN=ENO2 PE=1 SV=3	74	20	339
0.738855	0.204397	-0.0208972	-0.585461	-0.000965647	0.101473	-0.508109	0.828293	0.193912	-0.436879	-0.331754	0.279469	-0.395308	0.0652853	-0.269804	0.523811	0.709435	0.23336	0.0774653	1.39891	0.391853	0.224538	-0.0498436	-0.46699	-0.21654	-0.0596366	0.244863	-0.418289	1.21777	-0.0135803	-0.417639	-0.158397	-0.461751	-0.53331	-0.843119	0.0444448	-0.129487	0.0565963	-0.202326	0.18262	1.67426	0.0211707	0.285921	0.344601	P29401	Transketolase OS=Homo sapiens OX=9606 GN=TKT PE=1 SV=3	>sp|P29401|TKT_HUMAN Transketolase OS=Homo sapiens OX=9606 GN=TKT PE=1 SV=3	36	19	53
-0.0778221	0.240578	0.366269	-0.0496132	-0.549601	-0.0838337	0.488245	-0.399253	-0.404063	0.551669	0.401662	0.398571	0.973986	0.342776	0.932076	0.691339	-2.21678	-0.228122	0.386911	-0.66588	0.200047	-0.0271314	-0.127856	-0.109927	0.215388	0.260764	-0.630765	0.191369	0.30726	-0.69582	0.170965	-0.295988	0.562385	0.937329	0.650141	-0.374735	0.060816	-0.418357	0.531422	0.028774	1.4998	0.0316372	0.286238	-0.388664	Q4G0I0	Protein CCSMST1 OS=Homo sapiens OX=9606 GN=CCSMST1 PE=2 SV=1	>sp|Q4G0I0|CSMT1_HUMAN Protein CCSMST1 OS=Homo sapiens OX=9606 GN=CCSMST1 PE=2 SV=1	25	4	15
0.341506	0.350076	0.643529	0.345021	-0.054031	0.419075	0.779144	-0.331999	-0.187848	-0.221033	-0.29052	0.75441	-0.332281	0.666702	0.294753	-0.137746	-1.13736	-0.707925	-0.184702	-0.852652	0.694948	-0.0758175	0.543874	0.660142	1.05614	0.753201	-0.12855	0.735897	0.399253	-0.0310987	0.722575	-0.249858	0.646911	-0.34114	0.0958376	-0.476711	-0.060567	0.316214	0.296233	0.128541	1.61676	0.0241677	0.286873	-0.35517	P11362	Fibroblast growth factor receptor 1 OS=Homo sapiens OX=9606 GN=FGFR1 PE=1 SV=3	>sp|P11362|FGFR1_HUMAN Fibroblast growth factor receptor 1 OS=Homo sapiens OX=9606 GN=FGFR1 PE=1 SV=3	13	11	208
0.181414	0.312713	0.159177	-0.0238412	0.436428	0.146898	-0.0536376	0.0307385	0.725082	0.699403	0.272871	-1.54223	-0.40826	-1.18489	-0.213087	-0.73322	0.129968	-0.40619	-0.482578	0.136444	-0.928886	-0.311941	-0.820734	-0.875154	-1.07981	-0.555212	0.578677	0.149816	-0.129957	-0.397088	-0.558748	-0.471923	-0.183033	0.0418329	0.114171	0.0474445	0.094417	-0.154073	0.191058	0.0687833	1.60024	0.025105	0.286895	0.358535	P23381	Tryptophan--tRNA ligase, cytoplasmic OS=Homo sapiens OX=9606 GN=WARS PE=1 SV=2	>sp|P23381|SYWC_HUMAN Tryptophan--tRNA ligase, cytoplasmic OS=Homo sapiens OX=9606 GN=WARS PE=1 SV=2	23	8	24
-0.804459	-0.0201586	0.216815	1.00903	0.12451	-0.249528	0.113956	1.36211	-0.28433	-0.312207	-0.904697	1.37987	-1.07253	0.815744	0.849529	-0.663255	-0.466282	-0.975016	1.33702	-1.01146	3.29058	-0.163038	0.153076	1.10038	-1.1062	0.0548705	0.207352	-0.797332	-1.23211	-0.897534	1.85583	-0.815467	-0.283323	1.92597	-1.13218	-1.16308	-0.29468	0.214101	-1.06147	0.674567	1.15331	0.0702578	0.286938	-0.59318	Q8TEU8	WAP, Kazal, immunoglobulin, Kunitz and NTR domain-containing protein 2 OS=Homo sapiens OX=9606 GN=WFIKKN2 PE=1 SV=1	>sp|Q8TEU8|WFKN2_HUMAN WAP, Kazal, immunoglobulin, Kunitz and NTR domain-containing protein 2 OS=Homo sapiens OX=9606 GN=WFIKKN2 PE=1 SV=1	51	23	232
0.271642	0.60475	-0.0395829	0.104875	-0.134141	-0.088957	0.378503	-1.10806	0.312163	0.266011	0.739742	-0.0575871	0.602529	0.0394014	0.453252	0.028306	-0.505623	0.0829316	0.685291	0.0111565	0.523802	-0.559981	0.136113	0.243503	0.164279	-0.133054	-0.643239	0.530184	-0.494019	-0.548579	0.623382	-0.178921	0.223163	0.782239	0.163834	-0.781339	-0.845221	0.53963	0.489519	-0.248851	1.67854	0.0209631	0.287084	-0.338977	Q16620	BDNF/NT-3 growth factors receptor OS=Homo sapiens OX=9606 GN=NTRK2 PE=1 SV=1	>sp|Q16620|NTRK2_HUMAN BDNF/NT-3 growth factors receptor OS=Homo sapiens OX=9606 GN=NTRK2 PE=1 SV=1	15	7	140
0.523155	0.152192	1.2823	0.807591	0.151912	1.05755	0.711359	0.471737	-0.252399	-0.202393	-0.150264	1.19806	0.128485	0.909199	0.703212	-0.466123	-1.38303	-0.755262	0.217319	-0.410392	0.479459	-0.0869761	0.0503149	0.0099219	0.417314	0.443356	-0.272417	0.269761	-0.0861352	-0.582712	0.849933	-0.605831	0.54101	-0.134897	-0.550216	-0.829787	-0.469031	1.002	0.120348	0.115172	1.44994	0.0354864	0.287476	-0.398848	Q8N126	Cell adhesion molecule 3 OS=Homo sapiens OX=9606 GN=CADM3 PE=1 SV=1	>sp|Q8N126|CADM3_HUMAN Cell adhesion molecule 3 OS=Homo sapiens OX=9606 GN=CADM3 PE=1 SV=1	50	14	207
NaN	NaN	NaN	NaN	NaN	NaN	NaN	NaN	NaN	NaN	NaN	NaN	NaN	NaN	NaN	NaN	NaN	NaN	NaN	NaN	-1.22868	-0.212585	-0.553459	-1.26759	-0.93359	-0.929023	0.514114	-0.775655	3.47196	0.478442	NaN	NaN	NaN	NaN	NaN	NaN	NaN	NaN	NaN	NaN	0.897895	0.126504	0.287643	1.39115	P17661	Desmin OS=Homo sapiens OX=9606 GN=DES PE=1 SV=3	>sp|P17661|DESM_HUMAN Desmin OS=Homo sapiens OX=9606 GN=DES PE=1 SV=3	8	4	20
NaN	NaN	NaN	NaN	NaN	NaN	NaN	NaN	NaN	NaN	0.838058	0.637036	1.85623	0.0525252	1.18537	-0.223965	-0.800095	-0.209136	1.1532	-0.729619	NaN	NaN	NaN	NaN	NaN	NaN	NaN	NaN	NaN	NaN	0.493631	-0.360307	1.1151	0.764128	0.00950897	-1.33678	-1.884	2.44629	0.0588538	0.305179	1.02229	0.0949972	0.287663	-0.781135	Q96A83	Collagen alpha-1(XXVI) chain OS=Homo sapiens OX=9606 GN=COL26A1 PE=1 SV=1	>sp|Q96A83|COQA1_HUMAN Collagen alpha-1(XXVI) chain OS=Homo sapiens OX=9606 GN=COL26A1 PE=1 SV=1	3	1	6
-0.290466	-0.0512339	-0.593148	-0.425087	0.0919961	1.21248	-0.457434	-0.0234125	0.900969	0.642342	-0.356106	-0.75226	-0.951998	-0.218494	-1.22777	-0.350291	1.02198	-1.06495	-0.271939	-0.178784	-0.41177	0.0751897	-0.122956	-0.338138	-0.34875	0.0765171	-0.0524609	0.13968	-0.164429	-0.160835	0.264358	0.280168	0.00198344	-0.133605	-0.243062	0.481352	0.6704	-0.630843	0.434312	-0.66034	1.55115	0.0281093	0.287933	0.365773	P81172	Hepcidin OS=Homo sapiens OX=9606 GN=HAMP PE=1 SV=2	>sp|P81172|HEPC_HUMAN Hepcidin OS=Homo sapiens OX=9606 GN=HAMP PE=1 SV=2	19	1	11
-0.1854	0.0878643	-0.288756	0.33801	0.105403	0.597431	-0.258006	-0.175917	1.28242	0.209147	0.602929	-0.645721	-0.260466	-1.237	0.293189	-0.0189121	1.54567	0.264437	0.398654	0.258229	0.772303	0.279787	0.153342	0.166876	0.729698	0.708444	0.380065	0.241424	0.989506	-0.0699444	-0.382003	-0.575082	-0.691509	-0.399916	0.415312	0.987387	-0.216888	-0.0979438	-0.295786	0.0459861	1.51495	0.0305529	0.287971	0.374827	Q13683	Integrin alpha-7 OS=Homo sapiens OX=9606 GN=ITGA7 PE=1 SV=3	>sp|Q13683|ITA7_HUMAN Integrin alpha-7 OS=Homo sapiens OX=9606 GN=ITGA7 PE=1 SV=3	4	3	19
0.498537	0.00501897	-0.226465	0.461726	0.190047	-0.30343	-0.639299	-0.804003	0.388766	-0.34911	NaN	NaN	NaN	NaN	NaN	NaN	NaN	NaN	NaN	NaN	NaN	NaN	NaN	NaN	NaN	NaN	NaN	NaN	NaN	NaN	NaN	NaN	NaN	NaN	NaN	NaN	NaN	NaN	NaN	NaN	1.18845	0.0647968	0.288127	-0.527188	Q14703	Membrane-bound transcription factor site-1 protease OS=Homo sapiens OX=9606 GN=MBTPS1 PE=1 SV=1	>sp|Q14703|MBTP1_HUMAN Membrane-bound transcription factor site-1 protease OS=Homo sapiens OX=9606 GN=MBTPS1 PE=1 SV=1	2	2	2
1.53633	0.984324	0.916943	0.386725	-0.354069	-0.780658	1.00542	-1.55048	-0.680212	-1.88583	-1.18535	1.81865	-1.85195	1.69624	0.230137	0.137875	-0.822314	-0.51576	-0.013948	-1.04978	0.978609	-1.10022	0.937423	2.21648	0.452992	1.32378	0.0507926	1.04376	0.389248	0.636883	1.09611	0.246952	0.318366	-1.00507	-0.01154	-0.56484	-0.0596365	-0.208828	0.63486	-0.336704	1.1553	0.0699362	0.288146	-0.577723	Q6UW01	Cerebellin-3 OS=Homo sapiens OX=9606 GN=CBLN3 PE=1 SV=1	>sp|Q6UW01|CBLN3_HUMAN Cerebellin-3 OS=Homo sapiens OX=9606 GN=CBLN3 PE=1 SV=1	37	8	58
0.723643	0.421812	0.744331	0.39012	-0.0555017	-0.0378609	0.92189	-0.0957065	-0.119989	-0.0562361	-0.0762532	0.402174	0.329737	0.507038	0.141978	-0.0189166	-0.863447	-0.523004	0.703617	-0.469734	0.509574	-0.281733	0.517202	0.38679	0.742093	0.508024	-0.372446	0.665522	-0.136968	-0.0871599	0.896257	0.176197	0.488971	-0.255196	-0.207998	-0.599571	-0.368726	0.542303	0.0907011	0.265967	1.7418	0.0181218	0.288281	-0.327649	O43505	Beta-1,4-glucuronyltransferase 1 OS=Homo sapiens OX=9606 GN=B4GAT1 PE=1 SV=1	>sp|O43505|B4GA1_HUMAN Beta-1,4-glucuronyltransferase 1 OS=Homo sapiens OX=9606 GN=B4GAT1 PE=1 SV=1	56	19	792
NaN	NaN	NaN	NaN	NaN	NaN	NaN	NaN	NaN	NaN	8.0001	-3.0409	-0.547843	-3.80357	-4.51153	8.31545	-3.26857	-1.70764	-4.63102	-4.18433	-3.54669	-3.30747	6.95005	-3.32327	-0.703879	-3.64816	-4.09022	-2.79673	-3.71235	-3.71412	-5.24014	-6.41756	9.58948	-4.49845	-1.06086	-4.78927	-5.71581	-5.14577	-5.8307	-6.04686	0.837555	0.14536	0.289891	-2.3669	F5H7G1	Complement component C8 beta chain OS=Homo sapiens OX=9606 GN=C8B PE=1 SV=1	>tr|F5H7G1|F5H7G1_HUMAN Complement component C8 beta chain OS=Homo sapiens OX=9606 GN=C8B PE=1 SV=1	57	25	311
NaN	NaN	NaN	NaN	NaN	NaN	NaN	NaN	NaN	NaN	NaN	NaN	NaN	NaN	NaN	NaN	NaN	NaN	NaN	NaN	0.40214	-1.14494	0.884314	-0.109591	-0.950366	0.872676	2.47669	0.102843	1.05148	-0.143598	NaN	NaN	NaN	NaN	NaN	NaN	NaN	NaN	NaN	NaN	0.931021	0.117214	0.290413	1.05571	A0A087WYF1	Laminin subunit alpha-2 OS=Homo sapiens OX=9606 GN=LAMA2 PE=1 SV=1	>tr|A0A087WYF1|A0A087WYF1_HUMAN Laminin subunit alpha-2 OS=Homo sapiens OX=9606 GN=LAMA2 PE=1 SV=1	39	101	588
-0.572609	-0.509094	-1.47029	-0.314735	0.0488529	0.0174882	-0.400659	-1.01019	0.915098	1.23909	NaN	NaN	NaN	NaN	NaN	NaN	NaN	NaN	NaN	NaN	-1.14578	-0.236953	-0.323205	0.187015	-0.609569	-0.408809	0.142282	-0.535605	-0.00624729	0.351867	NaN	NaN	NaN	NaN	NaN	NaN	NaN	NaN	NaN	NaN	1.18677	0.0650469	0.290436	0.525068	D6RE86	Ceruloplasmin (Fragment) OS=Homo sapiens OX=9606 GN=CP PE=1 SV=8	>tr|D6RE86|D6RE86_HUMAN Ceruloplasmin (Fragment) OS=Homo sapiens OX=9606 GN=CP PE=1 SV=8	49	9	101
NaN	NaN	NaN	NaN	NaN	NaN	NaN	NaN	NaN	NaN	NaN	NaN	NaN	NaN	NaN	NaN	NaN	NaN	NaN	NaN	-3.40033	-1.7569	-3.2221	-1.78352	-3.31243	-1.02035	-2.44739	12.3012	-2.16043	1.61994	NaN	NaN	NaN	NaN	NaN	NaN	NaN	NaN	NaN	NaN	0.806355	0.156187	0.290549	4.35365	Q9GZZ8	Extracellular glycoprotein lacritin OS=Homo sapiens OX=9606 GN=LACRT PE=1 SV=1	>sp|Q9GZZ8|LACRT_HUMAN Extracellular glycoprotein lacritin OS=Homo sapiens OX=9606 GN=LACRT PE=1 SV=1	23	3	6
0.138389	0.276773	0.23466	0.107475	-0.279444	0.00948436	0.700105	-0.339469	-0.159117	-0.085086	0.492061	0.216448	0.327122	0.0714035	0.560812	-0.539445	-0.43994	-0.587984	0.171941	-0.281009	0.504982	-0.253799	-0.234587	-0.0868999	0.441181	0.174967	-0.112381	0.329466	-0.288148	-0.547704	0.496722	-1.24881	0.110335	0.682302	-0.219969	-0.670339	-1.01506	0.334834	-0.486387	-0.375563	1.71918	0.0190905	0.290676	-0.327199	P29218	Inositol monophosphatase 1 OS=Homo sapiens OX=9606 GN=IMPA1 PE=1 SV=1	>sp|P29218|IMPA1_HUMAN Inositol monophosphatase 1 OS=Homo sapiens OX=9606 GN=IMPA1 PE=1 SV=1	53	12	68
0.523559	-0.202641	0.516108	0.162998	-0.130997	-0.00109295	0.756937	-0.344125	-0.363371	-0.0527916	-0.473858	1.43304	0.406704	0.417007	0.907056	-0.266233	-1.27523	-0.999309	0.239582	-0.914401	0.599015	-0.128773	0.468546	0.157808	0.854353	0.943275	-0.316463	0.475392	0.0325575	0.0136966	0.245908	-0.592979	0.585504	0.094684	-0.135752	-0.251201	-0.537584	0.410519	0.377621	0.267533	1.49918	0.0316823	0.290793	-0.375599	Q9UQ52	Contactin-6 OS=Homo sapiens OX=9606 GN=CNTN6 PE=1 SV=1	>sp|Q9UQ52|CNTN6_HUMAN Contactin-6 OS=Homo sapiens OX=9606 GN=CNTN6 PE=1 SV=1	43	31	223
0.109913	0.500675	0.425426	0.11702	-0.644333	0.274371	0.698019	-0.273068	-0.991498	0.346516	0.534541	0.408602	1.28337	0.460236	1.18239	-0.672979	-1.45963	-0.908678	0.658572	-0.850152	NaN	NaN	NaN	NaN	NaN	NaN	NaN	NaN	NaN	NaN	0.814749	-1.43857	1.28521	0.601511	-0.635736	-0.979258	-1.14162	1.81846	0.452756	-0.516409	1.14023	0.0724045	0.291002	-0.569973	A0A0G2JLL6	Uncharacterized protein OS=Homo sapiens OX=9606 PE=4 SV=1	>tr|A0A0G2JLL6|A0A0G2JLL6_HUMAN Uncharacterized protein OS=Homo sapiens OX=9606 PE=4 SV=1	14	2	10
-0.362537	0.514489	-0.682427	0.496785	0.235454	1.23585	-0.598634	-0.196473	0.939476	1.28137	0.163785	0.177163	0.248642	-0.112081	1.02892	-0.077817	1.08022	1.20788	-0.53477	1.19695	-0.2705	-2.17695	-0.139779	-0.928454	-0.477522	-1.47069	0.716275	0.537435	0.39107	0.432161	-0.369676	-0.225267	-0.337306	-0.340063	1.06346	0.481546	0.636713	-0.617043	0.0495668	0.0741136	1.27856	0.052655	0.291585	0.462953	Q9NZP8	Complement C1r subcomponent-like protein OS=Homo sapiens OX=9606 GN=C1RL PE=1 SV=2	>sp|Q9NZP8|C1RL_HUMAN Complement C1r subcomponent-like protein OS=Homo sapiens OX=9606 GN=C1RL PE=1 SV=2	27	11	127
0.968549	0.497174	0.59585	0.291877	-0.0495857	-0.227462	0.700811	-0.445564	-0.488486	0.0692705	0.0414248	0.728902	0.630048	0.440173	0.65906	-0.062382	-0.546738	0.207172	0.54553	-0.312772	0.370561	-0.405138	0.681755	0.643731	-0.149731	0.401172	-0.236583	0.742525	-0.0802321	-0.0361874	0.702418	-0.00711976	0.710686	0.178604	0.133361	-0.549281	0.121528	0.713922	0.809214	-0.0646209	1.73641	0.0183482	0.291619	-0.320088	P58417	Neurexophilin-1 OS=Homo sapiens OX=9606 GN=NXPH1 PE=2 SV=1	>sp|P58417|NXPH1_HUMAN Neurexophilin-1 OS=Homo sapiens OX=9606 GN=NXPH1 PE=2 SV=1	26	6	47
-1.13192	-0.754138	-0.727809	-0.287976	0.461348	-0.28951	-0.112024	-1.27285	-0.321861	1.76663	1.15251	0.385503	-1.51198	-0.320825	0.140548	0.175738	2.02195	-0.119888	1.07171	0.358548	-1.19599	0.539252	-0.671999	0.337815	-1.62134	-2.47723	1.17091	-0.0370166	0.499776	0.190825	-1.64149	-0.359057	-1.7404	0.219519	0.185931	2.02112	0.0545499	-1.08327	1.50367	-1.66074	1.11036	0.0775602	0.291832	0.600177	A0A0B4J231	Immunoglobulin lambda-like polypeptide 5 OS=Homo sapiens OX=9606 GN=IGLL5 PE=1 SV=1	>tr|A0A0B4J231|A0A0B4J231_HUMAN Immunoglobulin lambda-like polypeptide 5 OS=Homo sapiens OX=9606 GN=IGLL5 PE=1 SV=1	46	11	733
NaN	NaN	NaN	NaN	NaN	NaN	NaN	NaN	NaN	NaN	0.313092	0.0406639	0.169523	-0.146005	0.459588	-0.821565	-1.35866	-0.752018	0.144229	-0.701537	0.980638	-0.40661	0.0840419	-0.228084	0.633563	0.356763	-0.520253	0.506281	0.159671	-0.23984	-0.104587	-0.440361	0.713554	-0.0333726	-0.01295	-0.670912	-1.09738	1.24549	-0.148322	-0.523365	1.33326	0.0464241	0.292009	-0.429607	157	BID_HUMAN	>gi|157| BID_HUMAN;>sp|P55957|BID_HUMAN BH3-interacting domain death agonist OS=Homo sapiens OX=9606 GN=BID PE=1 SV=1	29	3	7
0.0528518	0.283237	0.509353	0.123813	-0.51181	-0.0144646	0.294157	-0.234311	-0.723644	-0.314188	-0.101524	0.406326	0.890543	0.521856	0.68101	-0.0161011	-1.12309	-0.508664	0.434981	-0.369278	0.354569	0.0342496	-0.0914042	-0.421476	0.323243	0.389161	-0.305833	0.468924	-0.189669	-0.319201	0.872303	-0.948151	0.729813	0.178811	-0.313504	-0.822463	-0.787084	0.866707	0.00704328	-0.250726	1.55576	0.0278125	0.292111	-0.354593	P17174	Aspartate aminotransferase, cytoplasmic OS=Homo sapiens OX=9606 GN=GOT1 PE=1 SV=3	>sp|P17174|AATC_HUMAN Aspartate aminotransferase, cytoplasmic OS=Homo sapiens OX=9606 GN=GOT1 PE=1 SV=3	55	22	248
0.423159	0.278554	0.452085	-0.886899	-0.261792	-0.404198	0.210655	-0.34592	-0.408263	0.254733	0.440325	0.511155	0.66685	0.621644	0.996512	0.192603	-0.646584	-0.463881	0.523918	-0.607985	0.563682	-0.200061	0.273167	-0.182598	0.850897	0.359813	-0.324438	0.568679	0.164214	-0.310243	0.657262	-0.41565	0.660939	0.2315	0.128762	-0.50826	-0.268831	0.718322	0.348451	0.0177104	1.63756	0.0230378	0.292436	-0.33695	Q9UBQ6	Exostosin-like 2 OS=Homo sapiens OX=9606 GN=EXTL2 PE=1 SV=1	>sp|Q9UBQ6|EXTL2_HUMAN Exostosin-like 2 OS=Homo sapiens OX=9606 GN=EXTL2 PE=1 SV=1	42	10	124
-0.518756	-0.708113	-1.07342	-0.45124	-0.466974	0.381845	-1.03592	-0.567498	0.268549	0.282377	0.265888	-0.409312	0.40822	0.162334	0.076181	0.327124	0.915534	1.05121	-0.0790518	0.954299	-1.03535	-0.500708	0.00989772	-1.10853	-0.887598	-0.942026	1.3322	0.763822	-0.193047	2.08442	-0.913931	0.14415	0.253564	0.398794	1.79407	0.552709	0.660334	-1.55541	0.536034	-0.506297	1.23047	0.0588211	0.292628	0.489603	G3V2W1	Protein Z-dependent protease inhibitor OS=Homo sapiens OX=9606 GN=SERPINA10 PE=1 SV=1	>tr|G3V2W1|G3V2W1_HUMAN Protein Z-dependent protease inhibitor OS=Homo sapiens OX=9606 GN=SERPINA10 PE=1 SV=1	28	11	58
-0.869392	-0.788574	0.574469	0.295658	1.0797	7.16416	-0.69976	2.00427	-1.33216	-0.793927	NaN	NaN	NaN	NaN	NaN	NaN	NaN	NaN	NaN	NaN	-0.75943	0.505022	0.41161	1.04007	-1.18286	0.373792	1.28063	-0.103553	0.692362	0.0487901	-0.783785	0.0339166	-0.981825	0.173712	0.434731	0.669501	6.41331	-0.657601	0.37519	-0.0455636	0.922459	0.119548	0.293367	1.08043	Q9NZT1	Calmodulin-like protein 5 OS=Homo sapiens OX=9606 GN=CALML5 PE=1 SV=2	>sp|Q9NZT1|CALL5_HUMAN Calmodulin-like protein 5 OS=Homo sapiens OX=9606 GN=CALML5 PE=1 SV=2	29	3	5
-0.0849508	-0.97721	-3.42335	-2.56187	-4.05189	-3.0393	-4.02499	-3.46261	-1.69431	-1.24237	-0.186312	-3.17779	-1.70233	-2.80764	-1.83513	-0.979947	-1.45358	-0.987276	3.16325	0.544431	-2.68816	-1.69781	-1.48945	-0.773366	-2.01682	-3.38642	3.37816	-0.20768	2.09114	8.64851	-3.20851	-2.37514	-0.305286	1.91561	4.0384	2.28751	-0.58604	-0.358717	0.228024	-3.34753	0.895016	0.127346	0.29553	1.24896	P04003	C4b-binding protein alpha chain OS=Homo sapiens OX=9606 GN=C4BPA PE=1 SV=2	>sp|P04003|C4BPA_HUMAN C4b-binding protein alpha chain OS=Homo sapiens OX=9606 GN=C4BPA PE=1 SV=2	36	18	127
-0.365785	-0.0128997	-1.59629	-0.23645	-0.576523	-0.587101	-0.686693	-1.01839	1.03271	0.482766	0.375061	-1.21713	-0.464244	-0.601925	0.488484	0.125851	1.70967	1.05983	0.248263	0.91101	-1.42377	-0.0914817	-0.397488	-0.132257	-0.625182	-1.1135	1.12358	0.254488	-0.0476388	1.52036	-0.796962	-0.325632	0.1394	0.784255	2.0815	1.0511	1.00375	-1.18917	0.68974	-1.11495	1.17004	0.0676028	0.29726	0.52255	P01031	Complement C5 OS=Homo sapiens OX=9606 GN=C5 PE=1 SV=4	>sp|P01031|CO5_HUMAN Complement C5 OS=Homo sapiens OX=9606 GN=C5 PE=1 SV=4	53	76	949
-0.812764	-2.01819	-0.301081	-1.49632	0.0927448	-0.960831	-1.25615	1.51681	-2.44759	-0.962489	-3.40108	-0.28875	-0.83518	-0.875054	-0.690523	-0.891764	1.3017	-1.08544	1.78298	-2.11856	-1.14643	-0.684321	-1.9621	-1.06828	-1.39044	-1.14419	-1.064	-0.566215	-1.07926	-0.154799	-0.783049	-1.75254	-1.58204	-1.30987	0.34824	1.03204	-0.0978072	-0.753891	-0.641217	-0.918917	1.1137	0.0769655	0.300018	0.572372	P06312	Immunoglobulin kappa variable 4-1 OS=Homo sapiens OX=9606 GN=IGKV4-1 PE=1 SV=1	>sp|P06312|KV401_HUMAN Immunoglobulin kappa variable 4-1 OS=Homo sapiens OX=9606 GN=IGKV4-1 PE=1 SV=1	36	4	32
0.590324	0.469477	0.828565	0.368125	-0.138231	0.167126	0.702297	0.0950222	-0.147952	0.301775	0.554745	0.14639	0.721728	0.275215	0.10063	0.00843476	-0.664899	0.0807014	0.537593	-0.399144	0.412276	0.133409	0.300512	0.306578	0.592964	0.429423	-0.306834	0.545556	0.0277158	-0.343792	0.684992	-0.337199	0.539728	0.722198	-0.119625	-0.73102	-0.689516	0.930174	0.355274	0.0126481	1.73155	0.0185546	0.302847	-0.312111	P19022	Cadherin-2 OS=Homo sapiens OX=9606 GN=CDH2 PE=1 SV=4	>sp|P19022|CADH2_HUMAN Cadherin-2 OS=Homo sapiens OX=9606 GN=CDH2 PE=1 SV=4	31	24	404
0.474192	0.176946	0.736263	0.112441	-0.289939	-0.0872664	0.20219	-0.208899	-0.184203	0.193517	-0.237495	0.584824	0.568972	0.266193	0.301882	-0.322263	-0.786696	-0.0193993	-0.230919	-0.520816	0.457165	-0.337212	0.459267	0.20389	0.204231	0.308372	-0.11893	0.500703	0.0467833	-0.139173	0.302151	-0.0678558	0.459965	-0.0347243	0.145002	-0.446748	-0.0779134	0.393043	0.56416	-0.130072	2.01127	0.00974374	0.303644	-0.277534	B1B0D4	ADAMTS-like protein 2 OS=Homo sapiens OX=9606 GN=ADAMTSL2 PE=1 SV=1	>tr|B1B0D4|B1B0D4_HUMAN ADAMTS-like protein 2 OS=Homo sapiens OX=9606 GN=ADAMTSL2 PE=1 SV=1	18	12	61
-0.598255	-0.00694859	-0.837016	-1.85078	-0.44251	0.638521	-0.61961	0.415187	-1.69471	0.740652	-0.310825	0.632086	-0.0201644	1.20831	0.0716779	0.588993	1.08437	1.46303	1.49358	0.678233	-3.46006	0.0821554	-2.4471	-1.78408	-0.54903	-2.03689	1.05512	-2.96161	0.907517	0.704008	-0.267934	-0.853143	-1.28006	0.866932	2.3146	0.139402	1.71495	0.383582	1.37696	-1.5396	1.01725	0.0961052	0.3039	0.703192	P01599	Immunoglobulin kappa variable 1-17 OS=Homo sapiens OX=9606 GN=IGKV1-17 PE=1 SV=2	>sp|P01599|KV117_HUMAN Immunoglobulin kappa variable 1-17 OS=Homo sapiens OX=9606 GN=IGKV1-17 PE=1 SV=2	26	3	23
0.396325	0.241626	-0.159273	-0.0302473	-0.387325	-1.88569	0.405703	-1.21062	-0.722685	-1.40251	-1.07143	0.436621	-0.322917	0.921956	-0.427691	-0.46679	-0.650327	0.533432	0.81225	-0.543602	0.7456	-1.52592	1.84979	1.82383	-0.152317	0.730104	-0.920007	0.894485	0.0259957	0.474376	1.23727	1.92848	0.497831	-1.11333	-0.464579	-1.03846	-1.0373	-0.707934	0.0314194	0.467248	1.14182	0.0721399	0.304018	-0.531761	Q9UM22	Mammalian ependymin-related protein 1 OS=Homo sapiens OX=9606 GN=EPDR1 PE=1 SV=2	>sp|Q9UM22|EPDR1_HUMAN Mammalian ependymin-related protein 1 OS=Homo sapiens OX=9606 GN=EPDR1 PE=1 SV=2	40	8	52
0.138785	0.501171	1.32629	1.17249	1.27141	-0.168637	0.0830508	0.548612	-0.222083	-0.519929	-0.284658	1.1485	0.255833	0.677464	-0.0193747	1.14668	0.247977	0.876263	0.162716	0.372786	0.815761	-0.065684	1.39678	0.380933	0.596954	0.70715	0.388144	0.0904717	-0.166026	-0.309358	0.101827	0.636096	0.503763	-0.178914	0.257279	-0.314328	0.552614	-0.528489	0.0155741	0.621958	1.51383	0.0306318	0.304145	-0.352378	P09486	SPARC OS=Homo sapiens OX=9606 GN=SPARC PE=1 SV=1	>sp|P09486|SPRC_HUMAN SPARC OS=Homo sapiens OX=9606 GN=SPARC PE=1 SV=1	55	13	307
0.336324	0.150566	0.022156	-0.411963	-0.576276	-0.463106	0.138164	-0.581144	-0.243069	-0.581925	0.230862	0.258389	0.256509	-0.224761	0.513803	-0.766543	-0.811303	-0.532113	0.0848148	-0.4161	0.230985	0.0524677	-0.142505	-0.138076	0.451324	0.426266	0.210948	0.186977	-0.0132025	-0.393577	0.688542	-0.992963	0.489558	0.521199	-0.166296	-0.822745	-0.9293	0.680252	0.0555519	-0.180223	1.62624	0.0236464	0.305933	-0.325061	P60983	Glia maturation factor beta OS=Homo sapiens OX=9606 GN=GMFB PE=1 SV=2	>sp|P60983|GMFB_HUMAN Glia maturation factor beta OS=Homo sapiens OX=9606 GN=GMFB PE=1 SV=2	63	8	50
0.245698	0.738855	0.08879	0.121288	0.453828	0.0865802	0.531801	-1.58532	-0.0742817	0.110259	NaN	NaN	NaN	NaN	NaN	NaN	NaN	NaN	NaN	NaN	0.493268	-0.000586896	-0.299828	0.65121	-0.37252	-0.363087	-0.540988	-0.539284	0.180706	-0.148344	NaN	NaN	NaN	NaN	NaN	NaN	NaN	NaN	NaN	NaN	1.24578	0.0567826	0.306154	-0.446196	Q6PK18	2-oxoglutarate and iron-dependent oxygenase domain-containing protein 3 OS=Homo sapiens OX=9606 GN=OGFOD3 PE=1 SV=2	>sp|Q6PK18|OGFD3_HUMAN 2-oxoglutarate and iron-dependent oxygenase domain-containing protein 3 OS=Homo sapiens OX=9606 GN=OGFOD3 PE=1 SV=2	3	1	2
NaN	NaN	NaN	NaN	NaN	NaN	NaN	NaN	NaN	NaN	NaN	NaN	NaN	NaN	NaN	NaN	NaN	NaN	NaN	NaN	NaN	NaN	NaN	NaN	NaN	NaN	NaN	NaN	NaN	NaN	-1.42715	-1.24825	-2.38707	-1.77136	0.282178	1.20193	0.260194	-0.944148	0.771641	-1.84218	0.878152	0.132388	0.306405	1.19982	P01767	Immunoglobulin heavy variable 3-53 OS=Homo sapiens OX=9606 GN=IGHV3-53 PE=1 SV=2	>sp|P01767|HV353_HUMAN Immunoglobulin heavy variable 3-53 OS=Homo sapiens OX=9606 GN=IGHV3-53 PE=1 SV=2	61	6	176
-0.143851	0.575714	-0.117193	-0.154631	0.444358	0.688884	0.0277393	0.149054	0.928952	1.11305	-0.650841	0.088288	-0.287187	-0.830085	-0.352502	0.646915	-0.114695	-0.167605	0.375134	1.15351	0.340558	0.39828	0.102565	0.227115	0.359555	0.530799	0.802617	0.252155	0.426351	0.729693	-0.240274	1.38652	-1.1924	0.189742	-0.554927	0.21757	-0.894227	-0.112755	1.07675	-0.615825	1.4034	0.0395	0.306465	0.381263	P46821	Microtubule-associated protein 1B OS=Homo sapiens OX=9606 GN=MAP1B PE=1 SV=2	>sp|P46821|MAP1B_HUMAN Microtubule-associated protein 1B OS=Homo sapiens OX=9606 GN=MAP1B PE=1 SV=2	6	10	16
1.08322	-1.09041	0.786445	0.115776	0.197373	0.00476078	0.156047	0.544524	-0.548365	-1.54872	0.0128303	0.0608693	-0.624518	1.47555	-0.872558	-0.166754	-0.247659	-0.12041	1.18599	0.580312	1.04052	-0.35223	0.206847	0.0109302	1.49461	-1.83761	0.326224	-0.108367	-0.354002	-1.34293	-0.00281614	1.05482	1.12602	-0.0183855	0.259823	0.328072	0.0162065	0.00527929	-0.221943	0.24912	1.23143	0.0586912	0.308619	-0.453246	P04066	Tissue alpha-L-fucosidase OS=Homo sapiens OX=9606 GN=FUCA1 PE=1 SV=4	>sp|P04066|FUCO_HUMAN Tissue alpha-L-fucosidase OS=Homo sapiens OX=9606 GN=FUCA1 PE=1 SV=4	44	17	146
-0.78393	-0.413856	-0.912305	-0.681574	0.51307	0.481257	-0.425559	-0.434201	0.499695	-0.435761	0.403308	0.170856	-0.0914096	-0.764381	-0.846548	0.330555	0.983472	0.0855935	-0.270318	0.553107	-0.023109	-0.00951233	0.19266	0.183604	0.157733	-0.235551	0.723046	-0.177768	0.415016	0.713829	NaN	NaN	NaN	NaN	NaN	NaN	NaN	NaN	NaN	NaN	1.38473	0.0412354	0.308641	0.380787	P05107	Integrin beta-2 OS=Homo sapiens OX=9606 GN=ITGB2 PE=1 SV=2	>sp|P05107|ITB2_HUMAN Integrin beta-2 OS=Homo sapiens OX=9606 GN=ITGB2 PE=1 SV=2	16	10	17
0.828183	0.443414	0.426184	0.345091	-0.409589	-0.0426817	0.706649	-0.606235	-0.0920297	-0.268163	-0.345938	0.296446	0.596782	0.0620326	0.202957	-0.930337	-1.64576	-0.79467	1.1274	-0.532548	0.987526	-0.76556	0.277435	0.325077	0.274541	0.462994	-0.943689	0.7967	-0.71835	-0.386882	0.631578	-0.0124964	0.0922382	-0.539847	-0.569201	-1.11619	-0.754665	0.666268	0.424043	-0.286874	1.32766	0.0470259	0.308875	-0.404094	Q8IW52	SLIT and NTRK-like protein 4 OS=Homo sapiens OX=9606 GN=SLITRK4 PE=1 SV=1	>sp|Q8IW52|SLIK4_HUMAN SLIT and NTRK-like protein 4 OS=Homo sapiens OX=9606 GN=SLITRK4 PE=1 SV=1	19	13	90
0.444999	0.447926	0.640923	0.190152	-0.420213	0.0416749	1.01091	-0.0386776	-0.813435	0.212205	0.617459	-0.113062	1.21635	0.156793	0.833602	-0.349189	-1.18888	-0.624378	0.557193	-0.529078	0.236493	0.186475	0.456435	0.0275376	1.14641	0.653791	-0.163782	0.841879	0.38533	-0.66368	0.943828	-0.661155	0.527386	0.346465	-0.233383	-1.14592	-0.750279	1.71718	-0.228344	-0.138459	1.31451	0.0484717	0.30894	-0.410268	Q8TCZ2	CD99 antigen-like protein 2 OS=Homo sapiens OX=9606 GN=CD99L2 PE=1 SV=1	>sp|Q8TCZ2|C99L2_HUMAN CD99 antigen-like protein 2 OS=Homo sapiens OX=9606 GN=CD99L2 PE=1 SV=1	47	9	122
0.414905	0.0751249	0.625628	0.0669994	-0.408025	-0.0944268	0.63295	-0.15358	-0.296148	0.271139	0.153952	0.290049	0.842187	-0.0426211	0.715724	-0.44272	-1.27164	-0.475755	0.417059	-0.566971	0.528539	-0.132815	0.0604468	-0.0634843	0.39697	0.437557	-0.335989	0.574417	-0.315841	-0.613105	0.595738	-0.55743	0.569318	0.455844	-0.257198	-0.838857	-0.744674	0.924872	0.24648	0.0993212	1.50736	0.0310916	0.309877	-0.343788	Q08174	Protocadherin-1 OS=Homo sapiens OX=9606 GN=PCDH1 PE=1 SV=2	>sp|Q08174|PCDH1_HUMAN Protocadherin-1 OS=Homo sapiens OX=9606 GN=PCDH1 PE=1 SV=2	22	18	135
0.5185	0.326432	0.876463	0.338291	-0.227481	0.123281	1.24111	-0.0353585	0.174172	0.386722	0.951707	0.174764	0.806193	0.491099	0.684179	-0.0660576	-1.32788	-0.68615	0.781722	-0.597292	0.58559	0.346938	0.393685	0.410184	0.748391	0.763088	-0.346795	0.934274	0.63514	-0.466817	0.971479	-0.111092	1.07823	0.744062	-0.0685451	-0.668688	-0.382557	1.30738	0.0725802	0.625728	1.39094	0.0406498	0.309956	-0.378574	P04156	Major prion protein OS=Homo sapiens OX=9606 GN=PRNP PE=1 SV=1	>sp|P04156|PRIO_HUMAN Major prion protein OS=Homo sapiens OX=9606 GN=PRNP PE=1 SV=1	31	6	180
0.293487	0.289166	-0.800069	-0.534692	-0.491211	0.0224444	-0.136567	0.336141	0.571923	0.291195	0.0969216	-0.698795	-1.01799	-1.01688	-0.28513	-0.1807	0.787636	-0.138446	-1.37705	0.0276174	-1.29442	-0.797241	-1.34956	-1.10324	-1.15852	-1.20986	-0.317553	-1.18277	0.333884	-0.550502	-0.711398	-0.244956	-0.613746	0.105013	0.106493	0.636937	-0.237221	-0.280638	-0.696604	-0.333325	1.38145	0.0415484	0.310481	0.379666	P22314	Ubiquitin-like modifier-activating enzyme 1 OS=Homo sapiens OX=9606 GN=UBA1 PE=1 SV=3	>sp|P22314|UBA1_HUMAN Ubiquitin-like modifier-activating enzyme 1 OS=Homo sapiens OX=9606 GN=UBA1 PE=1 SV=3	19	13	36
-0.721499	-0.423803	-1.10744	-0.143082	-1.76771	-2.42372	-1.12263	-1.78157	0.628418	-2.0021	-1.408	-1.50248	-2.69056	-0.794374	-1.39211	-1.68799	0.164939	-0.302849	0.933743	0.994964	-0.701032	-2.32484	-0.0278678	0.312904	-0.886963	-1.46556	0.413717	-0.958961	-0.921751	2.48101	-1.46858	-0.103169	-1.59116	-3.39052	0.892647	-0.0546936	1.42563	-0.944533	-0.406274	-1.52108	1.0264	0.0941013	0.310684	0.634418	Q13790	Apolipoprotein F OS=Homo sapiens OX=9606 GN=APOF PE=1 SV=2	>sp|Q13790|APOF_HUMAN Apolipoprotein F OS=Homo sapiens OX=9606 GN=APOF PE=1 SV=2	18	4	26
0.0660407	0.453658	-0.752949	-0.278188	-0.156773	0.165166	-0.876332	-0.333168	1.01844	1.20625	0.553088	-0.607075	0.553652	-0.27773	0.490662	0.415256	1.05503	0.761738	-0.141449	0.554668	-0.489944	0.157732	0.0393863	-0.680712	-0.512304	-0.300009	0.606921	-0.00181973	0.737232	0.727205	-0.651198	-0.834902	0.437341	0.0642068	0.821904	0.18015	0.582961	-0.328424	0.196267	-0.455323	1.41676	0.0383034	0.310699	0.368743	P01024	Complement C3 OS=Homo sapiens OX=9606 GN=C3 PE=1 SV=2	>sp|P01024|CO3_HUMAN Complement C3 OS=Homo sapiens OX=9606 GN=C3 PE=1 SV=2	85	145	12008
-0.229197	0.474652	-1.10363	-0.375202	-0.106235	0.508156	-0.72175	0.644795	0.935398	0.202536	0.348728	-0.938369	-0.194423	-1.56655	-0.193057	-0.133737	2.04842	0.512273	-0.761171	0.184855	0.0930973	0.468634	0.0587228	-0.492042	-0.521956	-0.138479	1.64398	0.827451	-0.861305	1.23889	-0.230222	0.0443131	0.593925	0.666121	0.953224	0.331497	0.606429	-0.511875	0.0330611	-0.0830291	1.24193	0.0572889	0.310822	0.437793	P05154	Plasma serine protease inhibitor OS=Homo sapiens OX=9606 GN=SERPINA5 PE=1 SV=3	>sp|P05154|IPSP_HUMAN Plasma serine protease inhibitor OS=Homo sapiens OX=9606 GN=SERPINA5 PE=1 SV=3	45	17	176
0.591977	0.0384422	0.520809	0.346304	0.115081	-0.363857	0.467598	0.0216408	-0.315285	0.128268	0.37394	0.225824	0.468903	0.392514	0.270653	-7.69199e-05	-0.551526	-0.135505	0.391106	-0.267399	0.721588	-0.0907478	0.589273	0.154296	0.431413	0.357905	-0.11916	0.636225	0.136981	-0.474753	0.60711	0.122263	0.366918	-0.149816	-0.193994	-0.838337	-0.239443	0.5803	0.410004	0.41413	1.86475	0.0136538	0.310865	-0.283197	Q8WVQ1	Soluble calcium-activated nucleotidase 1 OS=Homo sapiens OX=9606 GN=CANT1 PE=1 SV=1	>sp|Q8WVQ1|CANT1_HUMAN Soluble calcium-activated nucleotidase 1 OS=Homo sapiens OX=9606 GN=CANT1 PE=1 SV=1	46	16	167
0.679465	0.181644	0.227912	0.206718	-1.08817	-1.24432	0.536191	-0.847954	-1.22025	0.153209	-0.988237	0.221279	-0.502748	-0.75138	-0.27295	-0.727299	-1.16403	-1.2564	-0.559231	-1.28394	0.294917	-0.376289	0.481229	-0.289963	0.52489	0.294387	-0.26409	0.628965	-0.467073	-0.366616	0.312255	-0.137984	0.657531	0.510249	0.809135	-0.186598	-0.00919646	0.6888	0.371501	-0.38574	1.32708	0.0470895	0.311131	-0.40046	Q9ULH4	Leucine-rich repeat and fibronectin type-III domain-containing protein 2 OS=Homo sapiens OX=9606 GN=LRFN2 PE=1 SV=2	>sp|Q9ULH4|LRFN2_HUMAN Leucine-rich repeat and fibronectin type-III domain-containing protein 2 OS=Homo sapiens OX=9606 GN=LRFN2 PE=1 SV=2	8	5	22
0.443774	0.207586	0.0257214	-0.0374207	-0.401939	-0.526782	0.141256	-0.800821	-0.178492	-0.0349913	-0.0753811	0.135314	0.275014	0.0476639	-0.0103822	-0.947154	-1.26175	-1.1212	0.555883	-0.752288	0.0280604	-0.926153	-0.36325	-0.256592	-0.0683852	0.00658537	-1.14236	0.0683431	-0.484913	-0.616394	0.256209	-0.36442	0.321601	0.226345	-0.284594	-0.433348	-0.718309	0.437967	0.599202	-0.244556	1.5508	0.0281319	0.311335	-0.331644	Q7Z553	MAM domain-containing glycosylphosphatidylinositol anchor protein 2 OS=Homo sapiens OX=9606 GN=MDGA2 PE=1 SV=2	>sp|Q7Z553|MDGA2_HUMAN MAM domain-containing glycosylphosphatidylinositol anchor protein 2 OS=Homo sapiens OX=9606 GN=MDGA2 PE=1 SV=2	37	26	120
1.20753	0.612069	0.433804	0.351621	0.328718	-0.285894	0.793081	-0.312877	0.738754	-0.398382	0.125803	0.2095	0.146196	1.1219	-0.430376	-0.426386	-0.995495	0.575352	0.996124	-0.219713	1.30908	-0.35443	1.24678	0.45366	0.934236	0.196212	-0.58594	0.566114	-0.441556	0.867726	0.770444	1.3062	0.424212	0.371557	-0.61496	-0.858616	-0.0715704	0.225128	1.10539	0.579544	1.32438	0.0473825	0.311409	-0.395328	P20827	Ephrin-A1 OS=Homo sapiens OX=9606 GN=EFNA1 PE=1 SV=2	>sp|P20827|EFNA1_HUMAN Ephrin-A1 OS=Homo sapiens OX=9606 GN=EFNA1 PE=1 SV=2	13	3	22
-4.78807	-3.94937	-0.00622259	1.80908	-3.77883	4.93903	-2.42683	-2.51517	-6.5656	4.54776	0.540066	1.46954	2.97037	-2.06818	3.89501	4.32173	-1.68992	-2.90716	-2.06276	0.508081	-0.423635	2.95702	-2.23202	-10.4019	2.15818	-2.14178	-7.66209	-12.0012	2.99867	-9.91362	0.456855	1.51802	1.00781	-7.27367	3.56402	-5.11783	4.00578	-6.28024	-5.4368	-8.07955	0.807585	0.155745	0.311658	-2.04518	A0A0J9YXX1	Immunoglobulin heavy variable 5-10-1 OS=Homo sapiens OX=9606 GN=IGHV5-10-1 PE=3 SV=1	>sp|A0A0J9YXX1|HV5X1_HUMAN Immunoglobulin heavy variable 5-10-1 OS=Homo sapiens OX=9606 GN=IGHV5-10-1 PE=3 SV=1	31	4	67
-0.595492	0.713905	-1.47119	-0.815869	-0.588424	0.128341	-0.562703	-0.203835	0.726326	0.54479	0.456812	-1.38294	-0.0938506	-0.989007	-0.379431	-0.0290431	1.61015	0.22423	-0.673044	0.838705	-0.996175	0.0529736	-0.358556	-0.406372	-0.494013	-0.684314	1.41631	-0.232898	-0.362017	0.759925	-0.646538	-0.0798279	0.189946	1.11982	1.38207	1.06222	0.471449	-0.86581	0.101391	-0.612652	1.20505	0.062366	0.312182	0.451984	P02760	Protein AMBP OS=Homo sapiens OX=9606 GN=AMBP PE=1 SV=1	>sp|P02760|AMBP_HUMAN Protein AMBP OS=Homo sapiens OX=9606 GN=AMBP PE=1 SV=1	49	14	781
0.414214	0.304626	0.792973	1.00842	0.186615	-0.35184	0.917386	0.174803	-0.0758243	0.172889	0.143342	0.429214	0.0913676	0.667851	0.464688	0.229246	-1.00863	-0.644777	0.948157	-0.313379	0.63418	-0.425262	0.0129242	0.201503	0.626769	0.258234	-0.0981091	0.271421	0.0945181	-0.192254	0.817782	0.75653	0.511023	-0.368538	-0.528495	-1.16227	-0.574241	0.499296	-0.369805	0.912956	1.43471	0.0367526	0.312195	-0.352697	Q7KYR7	Butyrophilin subfamily 2 member A1 OS=Homo sapiens OX=9606 GN=BTN2A1 PE=1 SV=3	>sp|Q7KYR7|BT2A1_HUMAN Butyrophilin subfamily 2 member A1 OS=Homo sapiens OX=9606 GN=BTN2A1 PE=1 SV=3	7	4	21
0.840037	0.925732	0.20795	0.530671	-0.533958	-0.488807	1.06262	-0.924555	-0.969817	-0.490393	-0.228364	-0.148881	-0.00483915	-0.170311	0.100872	-0.820749	-0.88548	-0.696916	0.959802	-1.00483	0.998353	-0.564349	0.290019	0.244263	0.605022	0.497522	-0.396849	-0.525361	-0.090172	-0.00134514	0.581795	-0.383661	0.612582	-0.361179	0.118647	0.136194	-0.288227	0.659659	0.621376	-0.285919	1.3544	0.0442186	0.3123	-0.379632	P48551	Interferon alpha/beta receptor 2 OS=Homo sapiens OX=9606 GN=IFNAR2 PE=1 SV=1	>sp|P48551|INAR2_HUMAN Interferon alpha/beta receptor 2 OS=Homo sapiens OX=9606 GN=IFNAR2 PE=1 SV=1	3	2	20
0.510833	0.186288	0.689577	0.183469	0.298895	-0.134905	0.585622	0.314683	-0.359035	0.442834	-0.172267	0.21862	0.600834	0.428218	0.796109	-0.148759	-1.03596	-0.459242	0.234087	0.505489	0.302872	0.0760817	0.357138	-0.0313427	0.839501	0.652699	0.10105	0.66675	0.129537	-0.538299	0.85126	-0.198262	0.819756	0.413659	-0.0982034	-0.518376	-0.709196	0.584959	0.283164	0.149476	1.60341	0.0249226	0.312359	-0.316323	P61970	Nuclear transport factor 2 OS=Homo sapiens OX=9606 GN=NUTF2 PE=1 SV=1	>sp|P61970|NTF2_HUMAN Nuclear transport factor 2 OS=Homo sapiens OX=9606 GN=NUTF2 PE=1 SV=1	69	5	69
0.151504	1.09017	-0.303958	-1.03287	0.42664	-0.605185	-0.142716	0.374847	0.41053	0.349622	-0.00506496	-0.463866	-0.258932	0.209275	-0.361684	0.0710989	0.461951	0.874908	0.478286	0.43581	-0.431096	-2.6062	0.699699	0.174507	-2.02952	0.486603	2.31012	2.24991	-0.108618	-1.0932	1.17521	-1.60165	-0.658774	-0.00914209	0.502881	0.846039	0.488683	-3.29691	0.6088	1.24297	1.04515	0.0901261	0.312495	0.58882	Q9Y336	Sialic acid-binding Ig-like lectin 9 OS=Homo sapiens OX=9606 GN=SIGLEC9 PE=1 SV=2	>sp|Q9Y336|SIGL9_HUMAN Sialic acid-binding Ig-like lectin 9 OS=Homo sapiens OX=9606 GN=SIGLEC9 PE=1 SV=2	10	5	15
0.101044	-0.0692463	1.58347	0.317774	0.347078	0.145669	0.519462	-0.462991	-0.0407597	-0.356666	0.684248	0.0886234	0.448412	0.737474	0.47847	-0.29795	-0.443048	0.0475807	0.558423	-0.194564	0.383159	-0.121023	0.383683	-0.0336927	0.488289	0.285262	-0.330765	0.288614	0.225546	-0.13978	0.697404	-0.772306	0.438171	-0.0489693	0.031485	-0.154727	-0.351401	0.475626	0.147445	0.118308	1.6776	0.0210087	0.312555	-0.306213	P49257	Protein ERGIC-53 OS=Homo sapiens OX=9606 GN=LMAN1 PE=1 SV=2	>sp|P49257|LMAN1_HUMAN Protein ERGIC-53 OS=Homo sapiens OX=9606 GN=LMAN1 PE=1 SV=2	29	10	65
0.652593	-0.0298673	0.225798	0.0412829	0.241385	-0.348553	0.271659	-0.327779	0.454294	-0.113589	0.189937	0.41487	0.254793	0.136002	0.0431668	-0.127124	-0.386727	0.14404	0.317646	-0.596318	0.903812	-0.871024	0.76769	0.539558	0.300656	0.252821	-0.598208	0.487823	-0.292024	-0.068151	0.303091	0.621384	0.316436	-0.222784	-0.0394452	-0.41939	-0.0623968	-0.208189	0.494057	0.094123	1.76156	0.0173159	0.312698	-0.291066	E9PGC5	Receptor-type tyrosine-protein phosphatase kappa OS=Homo sapiens OX=9606 GN=PTPRK PE=1 SV=1	>tr|E9PGC5|E9PGC5_HUMAN Receptor-type tyrosine-protein phosphatase kappa OS=Homo sapiens OX=9606 GN=PTPRK PE=1 SV=1	13	15	61
NaN	NaN	NaN	NaN	NaN	NaN	NaN	NaN	NaN	NaN	NaN	NaN	NaN	NaN	NaN	NaN	NaN	NaN	NaN	NaN	-0.208007	-0.547859	0.181374	0.652555	-0.0182565	0.252162	0.0606638	0.644151	0.52104	0.109845	-1.08696	-1.29985	-0.750153	-0.698744	-0.135266	-0.620198	0.105447	-0.756396	0.258007	0.0993521	1.17415	0.066966	0.312729	0.458525	Q16827	Receptor-type tyrosine-protein phosphatase O OS=Homo sapiens OX=9606 GN=PTPRO PE=1 SV=2	>sp|Q16827|PTPRO_HUMAN Receptor-type tyrosine-protein phosphatase O OS=Homo sapiens OX=9606 GN=PTPRO PE=1 SV=2	3	2	9
-0.421702	0.0368984	-0.67687	-0.337804	-0.221796	0.00721507	0.112737	-0.69426	-0.457309	0.182074	-0.139787	0.180761	-0.274211	-0.216265	-0.0836728	0.435446	1.70491	0.633567	-0.46629	-0.0444841	-0.158005	-0.0171995	0.278278	-0.348562	0.42545	0.35157	1.09159	0.203117	0.0153288	0.36097	-0.652431	0.693573	0.205209	0.491896	0.0738082	0.837375	0.743901	-0.654473	0.964894	0.47547	1.45906	0.0347486	0.31273	0.348289	P01189	Pro-opiomelanocortin OS=Homo sapiens OX=9606 GN=POMC PE=1 SV=2	>sp|P01189|COLI_HUMAN Pro-opiomelanocortin OS=Homo sapiens OX=9606 GN=POMC PE=1 SV=2	23	5	10
-1.11665	-0.816811	-0.748027	-0.661269	-0.755091	-0.799104	-0.85136	3.18064	-0.807871	-0.618861	-1.34742	-1.5874	-1.784	-2.28733	-1.64726	-1.92408	-0.991223	-1.4412	0.92595	4.29017	-1.16163	2.38441	-1.90396	-1.40041	-0.373399	-1.71547	2.10377	-2.11018	3.01976	-1.04011	-1.12468	0.663532	-0.707097	-1.66522	-2.25127	3.35988	-1.86611	-1.61976	-2.91639	-1.3739	0.92525	0.118782	0.312981	0.854777	P04040	Catalase OS=Homo sapiens OX=9606 GN=CAT PE=1 SV=3	>sp|P04040|CATA_HUMAN Catalase OS=Homo sapiens OX=9606 GN=CAT PE=1 SV=3	45	19	68
0.498771	0.85138	0.277693	0.517229	-0.0865319	0.315441	0.730631	0.223568	0.535069	0.524626	0.333384	-0.473388	0.637965	-0.00346694	0.454183	-0.712076	-1.44081	-0.673289	0.41421	-0.967268	0.451149	-0.739228	0.0459745	-0.422023	0.509553	0.229063	-1.04863	0.0575405	-0.317609	-0.0320721	0.780436	-0.300571	0.635608	0.495843	0.410515	0.806582	-0.418816	0.261533	-0.224415	-0.754824	1.37625	0.0420486	0.31304	-0.368301	Q9NZN1	Interleukin-1 receptor accessory protein-like 1 OS=Homo sapiens OX=9606 GN=IL1RAPL1 PE=1 SV=2	>sp|Q9NZN1|IRPL1_HUMAN Interleukin-1 receptor accessory protein-like 1 OS=Homo sapiens OX=9606 GN=IL1RAPL1 PE=1 SV=2	10	5	11
-0.513008	-0.511381	0.623178	0.331464	-0.0289755	-0.389894	-0.798462	0.12323	0.0681573	-0.506043	-2.32755	0.569711	-1.18137	-0.314186	-0.278855	3.43489	0.947391	3.04643	-1.00105	2.10144	0.402679	-1.04092	1.7852	-1.05645	2.09952	-0.00758878	1.31475	0.792255	-1.24315	0.88566	0.335375	1.98193	-0.772206	-0.700759	-0.459176	0.964199	1.27452	-1.06621	-0.101432	2.35534	1.00171	0.0996079	0.313302	0.66251	Q504Y0	Zinc transporter ZIP12 OS=Homo sapiens OX=9606 GN=SLC39A12 PE=2 SV=3	>sp|Q504Y0|S39AC_HUMAN Zinc transporter ZIP12 OS=Homo sapiens OX=9606 GN=SLC39A12 PE=2 SV=3	10	5	25
0.395354	0.19251	0.587506	0.329116	0.0936057	0.0913726	0.502229	-0.190343	0.00808781	0.408031	0.348844	0.979437	0.315665	0.289424	0.624035	-0.302904	-1.00608	-0.651553	0.723369	-0.28808	0.300056	0.132147	-0.247205	-0.121596	0.320734	-0.173573	-0.381145	0.0307288	-0.0457297	-0.148203	0.104337	-0.144895	0.42865	0.461275	0.092267	0.26204	-0.297943	0.552162	0.485507	0.160565	1.76383	0.0172254	0.3134	-0.287136	Q8IZA0	Dyslexia-associated protein KIAA0319-like protein OS=Homo sapiens OX=9606 GN=KIAA0319L PE=1 SV=2	>sp|Q8IZA0|K319L_HUMAN Dyslexia-associated protein KIAA0319-like protein OS=Homo sapiens OX=9606 GN=KIAA0319L PE=1 SV=2	16	13	38
NaN	NaN	NaN	NaN	NaN	NaN	NaN	NaN	NaN	NaN	-0.323613	-0.603603	-0.280647	-0.731729	-0.161493	-0.0694961	0.528934	0.00941978	-0.168935	1.17359	-0.869859	0.30535	0.403932	-0.213896	-0.712631	-0.195801	1.12038	-0.190524	0.434579	0.681429	-0.0326065	0.12036	0.526072	1.14258	0.939155	1.81763	0.664961	-0.0788457	0.151434	0.103616	1.21941	0.0603373	0.313426	0.431666	Q86VP6	Cullin-associated NEDD8-dissociated protein 1 OS=Homo sapiens OX=9606 GN=CAND1 PE=1 SV=2	>sp|Q86VP6|CAND1_HUMAN Cullin-associated NEDD8-dissociated protein 1 OS=Homo sapiens OX=9606 GN=CAND1 PE=1 SV=2	7	7	18
-0.18811	0.469914	0.422367	-0.000669178	0.338799	0.312124	0.137928	0.470279	0.297723	0.341451	-0.078939	0.146774	-0.134073	0.0412878	-0.19424	-0.00965618	0.447483	0.543991	0.380291	0.519095	-0.713768	-0.2196	0.0196636	-0.476045	0.386675	0.340642	0.238684	-0.134661	0.671067	-0.247107	-0.129366	-0.282708	0.105508	0.015516	-0.167759	0.377182	0.0353934	-0.269189	-0.0821403	0.0566928	2.10947	0.00777187	0.313477	0.253302	Q96AQ6	Pre-B-cell leukemia transcription factor-interacting protein 1 OS=Homo sapiens OX=9606 GN=PBXIP1 PE=1 SV=1	>sp|Q96AQ6|PBIP1_HUMAN Pre-B-cell leukemia transcription factor-interacting protein 1 OS=Homo sapiens OX=9606 GN=PBXIP1 PE=1 SV=1	27	17	92
NaN	NaN	NaN	NaN	NaN	NaN	NaN	NaN	NaN	NaN	0.196249	-0.0952082	0.37045	0.204879	0.755933	0.297979	-0.0975132	-0.2338	-0.172355	-0.350215	NaN	NaN	NaN	NaN	NaN	NaN	NaN	NaN	NaN	NaN	NaN	NaN	NaN	NaN	NaN	NaN	NaN	NaN	NaN	NaN	1.25487	0.0556069	0.313595	-0.397641	O43665	Regulator of G-protein signaling 10 OS=Homo sapiens OX=9606 GN=RGS10 PE=1 SV=2	>sp|O43665|RGS10_HUMAN Regulator of G-protein signaling 10 OS=Homo sapiens OX=9606 GN=RGS10 PE=1 SV=2	26	3	5
0.360324	0.584115	-0.08632	-0.250084	-0.16195	-0.196177	0.0125145	-0.354984	0.301829	-0.187801	0.400708	-0.101423	0.604956	0.0408233	0.306615	-0.344858	-0.526369	0.0910338	0.347843	-0.107155	0.505204	-0.200358	0.124112	0.124721	-0.292485	0.194402	-1.05751	0.493298	-0.228257	0.164212	1.1655	0.071744	1.13867	0.511635	0.200185	-0.280546	-0.331646	0.283585	1.10353	-0.749102	1.54346	0.0286113	0.313681	-0.320942	Q5VV63	Attractin-like protein 1 OS=Homo sapiens OX=9606 GN=ATRNL1 PE=2 SV=2	>sp|Q5VV63|ATRN1_HUMAN Attractin-like protein 1 OS=Homo sapiens OX=9606 GN=ATRNL1 PE=2 SV=2	4	4	17
0.682917	0.0178298	-0.512037	-0.256445	-0.701009	0.214455	-0.634114	0.298629	-0.27198	-0.897197	0.886903	-1.04089	-0.266732	-1.54472	-0.863839	-0.239106	0.285419	-0.355178	-0.398845	0.823809	-1.02948	-0.62788	-1.36629	-0.861594	0.0382281	-0.80438	3.33763	1.0178	0.995055	0.724603	0.636415	-0.154059	0.688392	0.0857	0.568279	0.0304243	-0.361144	0.056586	0.250013	-0.0275054	1.13006	0.0741216	0.313702	0.483264	O75083	WD repeat-containing protein 1 OS=Homo sapiens OX=9606 GN=WDR1 PE=1 SV=4	>sp|O75083|WDR1_HUMAN WD repeat-containing protein 1 OS=Homo sapiens OX=9606 GN=WDR1 PE=1 SV=4	32	13	46
0.561972	0.065819	0.902968	0.366997	-0.0880253	0.358611	0.890455	0.48802	-0.643406	0.25901	-0.139494	0.558299	1.33191	0.332973	0.599899	-0.259249	-1.66767	-0.766717	0.874778	-0.597573	0.52236	0.466265	0.475101	0.366287	1.0545	1.03185	0.375565	0.263323	0.377907	-0.530999	0.803941	0.181879	0.494891	0.634612	-0.372821	-1.21952	-0.883932	1.59975	0.138982	0.750499	1.27197	0.0534604	0.313737	-0.414032	184	PDGFB_HUMAN	>gi|184| PDGFB_HUMAN;>sp|P01127|PDGFB_HUMAN Platelet-derived growth factor subunit B OS=Homo sapiens OX=9606 GN=PDGFB PE=1 SV=1	16	3	20
0.296653	0.133263	0.541206	0.0345165	-0.371667	-0.695088	0.687186	-0.013254	-0.517154	0.304712	0.572394	0.530177	0.743348	0.229152	0.738781	-0.264551	-0.689768	-0.274606	0.744696	-0.420032	0.124334	-0.350959	0.149267	0.0515642	0.399536	0.455567	-0.310959	0.447839	-0.297481	-0.36664	0.590756	-0.543617	0.737426	-0.0371991	0.161642	-0.674539	-0.335132	0.659344	0.0312311	-0.0221315	1.58273	0.026138	0.313938	-0.314067	O43529	Carbohydrate sulfotransferase 10 OS=Homo sapiens OX=9606 GN=CHST10 PE=1 SV=1	>sp|O43529|CHSTA_HUMAN Carbohydrate sulfotransferase 10 OS=Homo sapiens OX=9606 GN=CHST10 PE=1 SV=1	35	11	71
NaN	NaN	NaN	NaN	NaN	NaN	NaN	NaN	NaN	NaN	0.722868	0.219066	0.831685	-0.575736	0.492161	-2.26259	-1.61802	-0.298545	-1.00045	1.26476	-0.143411	1.03758	-0.06351	-0.875453	-0.207537	-0.310823	-0.933894	0.476587	-0.453115	-0.326771	-0.679627	-0.935833	-0.354238	1.56076	-0.390129	-0.108027	-1.29921	0.986391	-0.796209	-0.920347	1.06537	0.0860261	0.314004	-0.549261	P08254	Stromelysin-1 OS=Homo sapiens OX=9606 GN=MMP3 PE=1 SV=2	>sp|P08254|MMP3_HUMAN Stromelysin-1 OS=Homo sapiens OX=9606 GN=MMP3 PE=1 SV=2	6	3	6
0.763471	1.01989	-3.81722	2.13411	1.58019	0.0503757	1.49601	1.00598	-0.665978	4.02362	-1.40689	0.0493724	-1.83138	-1.04382	-1.07236	0.378739	0.336931	0.20618	3.40024	1.29774	-0.887275	-1.60482	0.186675	-2.21308	-0.148792	-1.4117	-1.40774	-1.58366	-0.717274	-0.505168	3.37182	-3.16582	-2.96193	-3.00814	-2.85313	1.33229	-2.04469	-2.05291	2.74588	-3.75011	0.883565	0.130748	0.314041	0.952194	A0M8Q6	Immunoglobulin lambda constant 7 OS=Homo sapiens OX=9606 GN=IGLC7 PE=1 SV=3	>sp|A0M8Q6|IGLC7_HUMAN Immunoglobulin lambda constant 7 OS=Homo sapiens OX=9606 GN=IGLC7 PE=1 SV=3	60	7	634
1.2014	1.20053	2.07986	1.29985	-0.0902532	-0.101797	-0.209654	0.769767	-0.188869	-0.0274201	0.024133	0.266831	-0.303638	0.321059	-0.455371	0.403409	0.138185	0.491876	0.661868	-0.554188	1.21432	0.920388	-0.158424	2.35674	-0.731368	-0.0393444	-1.25406	-0.0882719	0.96162	0.048335	-0.0361716	0.746219	-0.273358	0.926993	0.0111876	0.584792	-0.131521	-0.233847	1.14945	-0.680605	1.19891	0.0632542	0.314109	-0.44106	Q86Y22	Collagen alpha-1(XXIII) chain OS=Homo sapiens OX=9606 GN=COL23A1 PE=1 SV=1	>sp|Q86Y22|CONA1_HUMAN Collagen alpha-1(XXIII) chain OS=Homo sapiens OX=9606 GN=COL23A1 PE=1 SV=1	7	4	10
0.183419	-0.0978597	0.241443	-0.146345	-0.313526	-0.0306066	0.435756	0.274304	-0.506093	0.689323	0.476159	-0.298063	0.940849	-0.225007	0.703148	-0.480075	-0.498456	-0.393045	-0.0685315	-0.75644	-0.108942	-0.0346101	-0.0801866	0.730077	-0.0753957	-0.0964998	-0.938874	0.48315	-0.749251	-1.08584	0.378456	-0.184434	0.326411	0.551209	0.223913	-0.8118	-1.20428	1.54127	-0.0947105	0.179026	1.37946	0.0417383	0.314408	-0.36512	Q9ULZ9	Matrix metalloproteinase-17 OS=Homo sapiens OX=9606 GN=MMP17 PE=1 SV=4	>sp|Q9ULZ9|MMP17_HUMAN Matrix metalloproteinase-17 OS=Homo sapiens OX=9606 GN=MMP17 PE=1 SV=4	20	8	47
0.34584	0.256252	0.303922	0.113927	1.09139	-0.324131	-0.167243	-1.39028	0.360511	-0.693135	-0.0774109	0.501046	-0.0066182	1.17603	-0.128966	0.428699	0.298984	1.07416	0.170376	0.374153	0.735438	-0.0192041	0.851182	0.652915	0.605887	0.467936	-0.407651	0.542132	-0.26018	0.142248	0.327209	2.22927	0.993189	-0.413475	-0.288407	-0.408791	0.540817	-0.861604	0.0178363	1.36037	1.27165	0.0535001	0.314433	-0.39921	Q9UBR2	Cathepsin Z OS=Homo sapiens OX=9606 GN=CTSZ PE=1 SV=1	>sp|Q9UBR2|CATZ_HUMAN Cathepsin Z OS=Homo sapiens OX=9606 GN=CTSZ PE=1 SV=1	31	8	76
0.184682	0.207324	0.404663	0.534304	-0.0136881	0.166174	0.346549	0.047501	-0.414061	0.497603	-0.0314748	-0.194102	1.65165	-0.221098	1.16034	-1.29778	-2.21485	-0.942464	0.634888	-0.834089	0.57255	0.22446	-0.0294013	-0.311246	0.121591	0.548567	-0.528642	0.288059	-0.766241	-0.680648	0.675007	-1.03971	0.572212	-0.944581	-0.437644	-1.55587	-1.13475	1.45388	0.452236	-0.178908	1.17042	0.0675427	0.314479	-0.459934	J3KQG3	EPH receptor A10, isoform CRA_b OS=Homo sapiens OX=9606 GN=EPHA10 PE=1 SV=1	>tr|J3KQG3|J3KQG3_HUMAN EPH receptor A10, isoform CRA_b OS=Homo sapiens OX=9606 GN=EPHA10 PE=1 SV=1	17	14	65
0.486099	1.14816	0.226024	0.280526	-0.362317	0.298656	0.419676	-0.492634	0.12005	-0.0124426	0.0505568	0.0949573	0.568574	0.459087	0.0860319	0.228789	-0.169215	-0.190009	0.436117	-0.250727	0.549792	-0.106187	-0.136484	0.596359	0.0469188	0.31822	0.0368485	0.31557	-0.337271	0.0674286	0.380637	0.668367	0.159882	0.0647796	-0.193444	-0.773738	-0.388316	0.0864651	-0.0385448	-0.119947	1.83574	0.0145968	0.315039	-0.275667	Q9NS98	Semaphorin-3G OS=Homo sapiens OX=9606 GN=SEMA3G PE=2 SV=1	>sp|Q9NS98|SEM3G_HUMAN Semaphorin-3G OS=Homo sapiens OX=9606 GN=SEMA3G PE=2 SV=1	43	24	193
0.594371	0.658311	0.629595	0.294374	-0.653009	-0.0049843	0.777942	-0.170485	-0.818037	0.0469218	0.519744	0.211059	1.31055	0.378523	0.902735	0.12122	-1.50243	-0.643759	0.919987	-0.642279	0.728002	0.253051	0.325277	-0.151443	0.679461	0.654132	-0.167159	0.892156	0.57189	-0.354334	0.747643	-0.514266	0.757715	0.552281	-0.132676	-0.813921	-0.644165	1.53831	0.326528	0.112114	1.27562	0.0530125	0.315402	-0.394583	O75093	Slit homolog 1 protein OS=Homo sapiens OX=9606 GN=SLIT1 PE=2 SV=4	>sp|O75093|SLIT1_HUMAN Slit homolog 1 protein OS=Homo sapiens OX=9606 GN=SLIT1 PE=2 SV=4	4	4	51
0.0419336	-0.166723	1.22389	0.477658	0.358301	0.0813265	0.509193	0.603567	0.310544	0.135995	0.108501	0.786859	0.729988	0.484303	-0.117663	-0.281867	-1.16085	-0.341533	0.193917	-0.539499	0.570048	0.274901	0.248417	-0.0887555	0.884102	0.583	-0.19221	0.631614	0.0252849	-0.788353	1.26057	0.117849	1.50718	0.36277	-0.0353956	-0.718335	-0.091115	1.54409	0.404755	0.775986	1.33805	0.045915	0.316146	-0.367162	A0A0J9YW36	Stathmin-3 (Fragment) OS=Homo sapiens OX=9606 GN=STMN3 PE=1 SV=1	>tr|A0A0J9YW36|A0A0J9YW36_HUMAN Stathmin-3 (Fragment) OS=Homo sapiens OX=9606 GN=STMN3 PE=1 SV=1	16	4	20
-0.500145	1.37022	-0.904097	0.422568	-0.22593	-0.493837	-0.569832	-1.55277	0.508432	0.42339	0.0126038	0.445186	0.110205	1.29462	1.30801	0.00433022	-1.39939	-0.307084	0.854435	-0.524761	-0.46931	0.0613711	-0.593675	0.909841	0.634993	0.381614	-1.46447	-0.148168	0.832853	-0.151683	-0.21292	-0.417075	-0.0478524	0.422548	0.00611204	-0.94519	-1.15627	0.441435	0.278373	0.0375594	1.19847	0.0633183	0.316399	-0.428916	Q9P2K9	Protein dispatched homolog 3 OS=Homo sapiens OX=9606 GN=DISP3 PE=2 SV=2	>sp|Q9P2K9|DISP3_HUMAN Protein dispatched homolog 3 OS=Homo sapiens OX=9606 GN=DISP3 PE=2 SV=2	2	2	9
0.483629	0.330446	-0.354472	0.884716	-1.24408	0.215005	1.61784	1.80202	0.366536	0.437007	1.2497	-0.176898	1.52711	-0.408306	-0.724016	1.52528	1.53153	0.355286	0.781566	-0.512146	2.53953	0.513055	1.27509	-0.150693	-1.20084	1.04058	0.0426373	1.57499	0.93069	0.822357	-0.155301	-0.073355	-0.176721	-1.82222	-0.122365	-1.34051	-1.29499	1.73197	-0.54205	2.43174	1.03315	0.0926501	0.316545	0.566166	A0A1W2PPR8	HLA class I histocompatibility antigen, B-46 alpha chain OS=Homo sapiens OX=9606 GN=HLA-B PE=1 SV=1	>tr|A0A1W2PPR8|A0A1W2PPR8_HUMAN HLA class I histocompatibility antigen, B-46 alpha chain OS=Homo sapiens OX=9606 GN=HLA-B PE=1 SV=1	29	8	52
0.300169	0.963284	0.250737	1.42784	0.982082	0.0422224	-0.180856	-0.256331	0.461871	0.259566	1.26706	0.118832	-0.0314668	0.700341	0.630337	0.34913	0.646433	0.63975	0.294392	0.236449	-0.284917	0.525263	-0.492028	-0.312967	-0.546768	-0.426605	-0.318925	-0.469193	-0.437095	-0.165244	0.683484	0.887443	0.519599	1.09246	1.15519	0.486647	0.629081	-0.170094	0.948182	0.286948	1.39786	0.0400077	0.316633	-0.348983	O60512	Beta-1,4-galactosyltransferase 3 OS=Homo sapiens OX=9606 GN=B4GALT3 PE=1 SV=2	>sp|O60512|B4GT3_HUMAN Beta-1,4-galactosyltransferase 3 OS=Homo sapiens OX=9606 GN=B4GALT3 PE=1 SV=2	28	7	20
-0.385639	-0.220016	-0.271521	-1.00086	0.122671	0.750639	-1.1084	-0.0644231	-0.251704	-0.712786	-1.05983	-0.987615	-1.31257	-0.780386	-0.894076	0.385703	-0.389333	-1.13018	-0.819954	-0.0652396	-0.892231	-0.331368	-0.199945	-0.147031	-1.05574	-0.0376782	-0.144943	-0.126562	-0.469012	0.160138	-0.430143	-0.136302	-0.603347	-0.826938	-0.0672831	0.356098	-0.185907	-0.823518	-0.477992	0.166586	1.50226	0.0314583	0.316735	0.324585	P46926	Glucosamine-6-phosphate isomerase 1 OS=Homo sapiens OX=9606 GN=GNPDA1 PE=1 SV=1	>sp|P46926|GNPI1_HUMAN Glucosamine-6-phosphate isomerase 1 OS=Homo sapiens OX=9606 GN=GNPDA1 PE=1 SV=1	31	6	13
NaN	NaN	NaN	NaN	NaN	NaN	NaN	NaN	NaN	NaN	-0.500877	-0.844846	-1.19673	-0.471335	-0.584802	-0.610658	0.147486	-0.182109	-1.38647	0.41543	-1.13082	0.878137	-1.66641	-0.4215	-2.2929	-0.122717	3.99524	-1.07362	-0.220116	-0.52118	-1.74483	-0.622409	-1.56668	-0.580026	0.649904	0.183965	-1.02438	-0.464373	-1.00663	-0.399306	0.976595	0.105537	0.316802	0.655113	A0A0C4DH32	Immunoglobulin heavy variable 3-20 OS=Homo sapiens OX=9606 GN=IGHV3-20 PE=3 SV=2	>sp|A0A0C4DH32|HV320_HUMAN Immunoglobulin heavy variable 3-20 OS=Homo sapiens OX=9606 GN=IGHV3-20 PE=3 SV=2	57	5	124
0.638471	0.279914	0.762748	0.18519	0.0727192	0.20834	0.795765	0.145595	-0.300236	0.961281	0.624768	0.815308	1.08976	0.905049	1.22684	-0.445808	-0.972637	0.0873753	0.239734	-0.287614	0.50884	0.274663	0.00743232	-0.358655	0.602689	0.439101	-0.239285	0.701382	-0.589395	-0.661726	0.757541	-1.05404	0.334581	0.417591	-0.327184	-1.16052	-0.733269	1.02588	0.588612	0.354249	1.29481	0.0507211	0.317581	-0.38037	Q15256	Receptor-type tyrosine-protein phosphatase R OS=Homo sapiens OX=9606 GN=PTPRR PE=1 SV=2	>sp|Q15256|PTPRR_HUMAN Receptor-type tyrosine-protein phosphatase R OS=Homo sapiens OX=9606 GN=PTPRR PE=1 SV=2	8	5	34
-0.316348	0.396041	-0.0375911	-0.689622	-0.317266	-0.316355	0.329838	-0.478705	0.26712	0.131562	0.668577	-0.0830547	0.8627	0.224112	0.459167	-0.524285	-1.64192	-0.496515	-0.251498	-0.580161	0.348561	-0.152301	0.127793	0.300176	0.436139	0.261435	-0.294817	0.497505	-0.284341	-0.318059	0.708859	-0.257488	0.447623	0.867003	0.186435	-0.226259	-0.198143	0.954917	0.431824	0.206588	1.44276	0.036078	0.317851	-0.335489	Q9Y2G1	Myelin regulatory factor OS=Homo sapiens OX=9606 GN=MYRF PE=1 SV=3	>sp|Q9Y2G1|MYRF_HUMAN Myelin regulatory factor OS=Homo sapiens OX=9606 GN=MYRF PE=1 SV=3	4	4	16
1.02984	0.436731	-0.0441037	0.154739	0.177806	-0.25326	0.537199	-0.579712	0.750448	-0.443995	0.758895	-0.0626756	0.238598	0.389009	0.0722895	-0.364613	0.250524	0.314173	0.357366	-0.154474	0.684983	-0.790685	0.534342	0.73228	0.453446	0.0177168	-0.840785	0.246235	-0.478619	0.0698705	0.761465	0.467739	0.195922	0.0680865	-0.141316	-0.175314	-0.053841	0.123872	0.51826	0.208832	1.59282	0.0255378	0.319107	-0.303375	Q08345	Epithelial discoidin domain-containing receptor 1 OS=Homo sapiens OX=9606 GN=DDR1 PE=1 SV=1	>sp|Q08345|DDR1_HUMAN Epithelial discoidin domain-containing receptor 1 OS=Homo sapiens OX=9606 GN=DDR1 PE=1 SV=1	18	16	106
0.100232	0.734375	-0.549289	0.823857	-0.0302786	-0.379779	0.321905	-0.0765983	-0.0343497	0.138964	1.90925	-1.54771	0.0650892	0.0748216	1.26537	0.0552749	0.113439	-0.571351	-0.0810171	0.565357	1.68492	1.01711	0.0752375	0.304179	-1.4999	-0.75508	-0.912728	-0.23942	-0.476684	-0.7673	0.755319	0.081274	-0.0804534	0.863616	0.156196	0.732453	-0.234697	0.262152	0.0714836	0.0531527	1.1948	0.063856	0.319968	-0.420901	P01891	HLA class I histocompatibility antigen, A-68 alpha chain OS=Homo sapiens OX=9606 GN=HLA-A PE=1 SV=4	>sp|P01891|1A68_HUMAN HLA class I histocompatibility antigen, A-68 alpha chain OS=Homo sapiens OX=9606 GN=HLA-A PE=1 SV=4	38	10	46
-0.774578	-0.203507	-0.422555	-0.666972	0.0669544	-0.180092	-0.330964	0.626628	-0.287318	0.0237379	-0.170793	-0.734195	0.146001	-0.892252	-0.758122	0.120976	0.638115	0.482494	-0.340465	-0.430384	-1.0365	-0.845945	-0.416883	-0.655679	-0.811407	-0.482341	-0.544107	-0.248062	-0.78141	-0.619647	-0.698508	-1.55442	-0.129018	-0.622247	-1.21952	0.120604	-1.13993	-0.313263	-1.02272	-1.12121	1.45787	0.0348439	0.320361	0.328539	P13861	cAMP-dependent protein kinase type II-alpha regulatory subunit OS=Homo sapiens OX=9606 GN=PRKAR2A PE=1 SV=2	>sp|P13861|KAP2_HUMAN cAMP-dependent protein kinase type II-alpha regulatory subunit OS=Homo sapiens OX=9606 GN=PRKAR2A PE=1 SV=2	13	3	8
0.245081	0.154654	0.0214555	0.0534418	-0.00747787	-0.535527	-0.0615161	-0.708331	-0.206943	-0.00459462	-0.221395	-0.475049	-0.0408544	-0.071159	-0.391618	-0.0240264	-0.275871	0.206167	-0.241337	-0.124069	0.388444	-0.583291	0.610678	0.686198	-0.288516	0.0448415	-0.882332	0.100958	-0.926461	-0.185467	0.675968	1.19724	0.541776	0.521818	0.372057	-0.258756	0.100977	0.333746	0.852401	-0.0553125	1.53769	0.0289938	0.320586	-0.312045	O94933	SLIT and NTRK-like protein 3 OS=Homo sapiens OX=9606 GN=SLITRK3 PE=2 SV=2	>sp|O94933|SLIK3_HUMAN SLIT and NTRK-like protein 3 OS=Homo sapiens OX=9606 GN=SLITRK3 PE=2 SV=2	15	11	31
0.000513826	0.93672	0.778408	0.834859	0.192495	-0.695788	1.18168	-0.385892	0.236822	0.466799	0.635569	-0.246141	1.14688	-0.39062	0.687938	-0.520029	0.0874233	0.450348	0.665307	-0.571894	0.894631	0.0711961	0.393361	0.293505	0.655432	0.750627	-0.612882	0.503043	0.0437137	-0.606301	0.834269	0.700563	0.513201	0.141802	-0.426663	-0.650309	-0.164925	0.654852	-0.540421	1.16908	1.33477	0.0462621	0.32313	-0.359333	A0A0G2JHM8	Myelin-oligodendrocyte glycoprotein OS=Homo sapiens OX=9606 GN=MOG PE=1 SV=1	>tr|A0A0G2JHM8|A0A0G2JHM8_HUMAN Myelin-oligodendrocyte glycoprotein OS=Homo sapiens OX=9606 GN=MOG PE=1 SV=1	15	4	54
-0.0247867	-0.649659	-0.100672	-0.619579	0.475156	-0.15189	0.346806	-0.329644	0.356126	-0.289439	-0.509736	-0.546027	-0.568619	-0.678886	-0.240634	-0.623309	1.69072	0.256343	0.462705	0.149615	0.188531	-0.593402	0.546691	2.34355	0.0602159	0.259047	1.92797	1.94612	0.0607532	0.208723	0.316894	0.923647	0.327182	-0.0887041	0.370491	1.48239	0.797337	-0.412459	0.615967	0.932389	1.15361	0.0702085	0.324231	0.437731	Q4G148	Glucoside xylosyltransferase 1 OS=Homo sapiens OX=9606 GN=GXYLT1 PE=1 SV=2	>sp|Q4G148|GXLT1_HUMAN Glucoside xylosyltransferase 1 OS=Homo sapiens OX=9606 GN=GXYLT1 PE=1 SV=2	6	3	6
0.6046	0.157694	1.36415	-0.107557	-0.298064	-0.0414356	0.16968	0.248495	-0.126229	0.702059	0.781479	0.315138	1.47553	0.110499	0.633218	-0.369746	-1.1357	0.233983	0.22117	-0.716444	-0.123123	-0.250807	-0.426821	0.0944807	-0.231113	0.0229971	-0.143335	0.186976	-0.669962	-0.233023	0.285512	-0.433453	0.820953	0.497457	0.106328	-0.282277	-0.485705	0.8898	-0.0207194	0.0839119	1.38653	0.0410648	0.324797	-0.342081	Q5VWW1	Complement C1q-like protein 3 OS=Homo sapiens OX=9606 GN=C1QL3 PE=2 SV=1	>sp|Q5VWW1|C1QL3_HUMAN Complement C1q-like protein 3 OS=Homo sapiens OX=9606 GN=C1QL3 PE=2 SV=1	28	5	30
0.494153	0.616066	-0.52629	0.165097	-0.349309	0.0942293	0.367376	-0.54837	0.155544	-0.00117031	-0.384504	-0.326715	0.468617	-0.271474	0.00264263	0.769556	0.426587	1.08231	-0.0169492	0.0640771	-0.217455	-0.46925	0.327688	-0.0584506	0.139027	0.670069	0.276894	1.07922	0.910937	0.335066	-0.317131	0.660678	-0.298992	0.310556	0.0878526	0.378711	0.357755	-0.293839	0.0211912	-0.0992344	1.58425	0.0260464	0.325405	0.298858	Q9BZ76	Contactin-associated protein-like 3 OS=Homo sapiens OX=9606 GN=CNTNAP3 PE=2 SV=3	>sp|Q9BZ76|CNTP3_HUMAN Contactin-associated protein-like 3 OS=Homo sapiens OX=9606 GN=CNTNAP3 PE=2 SV=3	16	19	60
-1.6175	-0.755351	-1.46588	-1.69751	-0.666305	0.0657093	-1.41455	-1.37859	-0.283091	-0.692176	NaN	NaN	NaN	NaN	NaN	NaN	NaN	NaN	NaN	NaN	-0.899396	0.332122	-1.08784	0.239739	-1.94815	-0.360485	-0.594814	-0.754459	-0.122381	0.316802	-0.876282	-0.190969	-0.981958	0.280006	-0.502658	0.47626	-0.100465	-0.574478	0.283993	-0.09024	1.13152	0.0738718	0.326398	0.440998	Q8IVA1	Purkinje cell protein 2 homolog OS=Homo sapiens OX=9606 GN=PCP2 PE=1 SV=2	>sp|Q8IVA1|PCP2_HUMAN Purkinje cell protein 2 homolog OS=Homo sapiens OX=9606 GN=PCP2 PE=1 SV=2	15	1	3
-0.152896	-0.0522909	-0.0132472	0.0733251	0.0899985	0.348507	0.0495019	0.110109	0.542456	0.446538	0.477626	0.556003	1.42733	0.751323	1.05177	0.471773	-0.458894	-0.0159735	0.595748	-0.533528	0.49135	1.92399	0.149076	0.209438	0.378474	0.306885	-0.208668	0.346528	-0.40846	-0.43961	0.404814	-0.002852	0.478314	0.27755	-0.316125	-0.263085	-0.292959	0.788909	0.436005	-0.174278	1.42117	0.0379166	0.326896	-0.327773	C9J2B6	Netrin receptor UNC5D OS=Homo sapiens OX=9606 GN=UNC5D PE=1 SV=1	>tr|C9J2B6|C9J2B6_HUMAN Netrin receptor UNC5D OS=Homo sapiens OX=9606 GN=UNC5D PE=1 SV=1	9	5	45
0.174983	0.109275	0.552602	0.363741	-0.318547	-0.653233	0.49221	-0.409819	-0.683697	0.294137	0.760533	1.05754	-0.107951	0.667783	0.64988	0.179679	0.0187733	0.0302601	0.229029	-0.582121	0.484214	-0.371081	0.401638	-0.0111853	0.563464	0.589036	0.098526	0.460742	0.1839	-0.0651579	1.01977	-0.293938	0.536886	0.760654	0.00217904	-0.430387	-0.0930556	0.772464	0.208624	0.277148	1.53559	0.0291344	0.326973	-0.304269	O95390	Growth/differentiation factor 11 OS=Homo sapiens OX=9606 GN=GDF11 PE=1 SV=1	>sp|O95390|GDF11_HUMAN Growth/differentiation factor 11 OS=Homo sapiens OX=9606 GN=GDF11 PE=1 SV=1	21	7	45
-0.831184	-0.592528	-0.366147	-0.961115	0.684662	0.0468346	-0.204653	0.101119	-0.132847	-0.020541	-0.0160217	-0.742573	0.474098	-0.363603	-0.0511213	-0.297587	0.732082	0.8592	0.602353	0.840638	0.130493	0.134861	0.559486	0.529762	0.667791	0.163067	0.50805	-0.123767	0.516976	0.425635	0.502051	0.393908	0.1521	-0.0731189	-0.772234	0.451994	-0.188661	-0.10071	0.430334	1.64911	1.3661	0.0430429	0.327309	0.339953	Q9BW30	Tubulin polymerization-promoting protein family member 3 OS=Homo sapiens OX=9606 GN=TPPP3 PE=1 SV=1	>sp|Q9BW30|TPPP3_HUMAN Tubulin polymerization-promoting protein family member 3 OS=Homo sapiens OX=9606 GN=TPPP3 PE=1 SV=1	34	5	19
0.656884	0.419232	0.8641	0.685033	-0.242198	0.475493	-0.0286793	-1.20375	-1.15347	0.122024	0.578505	-0.308085	0.468223	1.3815	0.512271	-1.15355	-0.888837	0.532123	-0.903621	0.678203	-0.536814	-1.83005	0.17316	1.50939	1.31154	0.917572	0.0419539	1.69504	-0.416418	-1.22714	0.451733	-0.594971	0.0702025	1.18036	-0.0151095	-1.00881	-0.130558	0.0403529	2.09782	-2.04006	1.0482	0.0894958	0.32732	-0.514461	P41217	OX-2 membrane glycoprotein OS=Homo sapiens OX=9606 GN=CD200 PE=1 SV=4	>sp|P41217|OX2G_HUMAN OX-2 membrane glycoprotein OS=Homo sapiens OX=9606 GN=CD200 PE=1 SV=4	23	4	29
0.0674881	0.615973	0.39638	0.272589	-0.256194	0.0822408	0.70864	-0.115119	-0.169043	-0.339471	0.224964	-0.149514	0.444576	0.274247	0.343224	-0.337752	-0.40792	-0.259305	0.41483	0.208949	0.551231	0.15146	-0.00617365	0.308289	0.576876	0.0833738	0.26418	0.2352	-0.104174	-0.221162	1.32466	-0.966363	0.480726	0.846538	0.113217	-0.642072	-0.862236	0.773359	-0.00303096	0.139508	1.51528	0.0305295	0.327363	-0.30826	P30086	Phosphatidylethanolamine-binding protein 1 OS=Homo sapiens OX=9606 GN=PEBP1 PE=1 SV=3	>sp|P30086|PEBP1_HUMAN Phosphatidylethanolamine-binding protein 1 OS=Homo sapiens OX=9606 GN=PEBP1 PE=1 SV=3	82	13	209
0.913637	-0.266166	1.66697	0.79189	0.149584	-0.225416	1.51273	0.736305	-0.710667	0.264276	0.066315	0.578727	1.36008	0.141003	1.18322	-0.186321	-1.39632	-0.226398	0.688727	-0.763836	-0.0251774	-0.211923	-0.314506	-0.19964	0.671569	0.296088	-1.34851	0.66699	-0.407092	-1.06561	0.886151	-0.559793	0.837603	-0.927868	-0.783408	-1.45844	-1.18635	1.11894	-0.210073	0.624831	1.09921	0.0795782	0.327603	-0.461721	Q16849	Receptor-type tyrosine-protein phosphatase-like N OS=Homo sapiens OX=9606 GN=PTPRN PE=1 SV=1	>sp|Q16849|PTPRN_HUMAN Receptor-type tyrosine-protein phosphatase-like N OS=Homo sapiens OX=9606 GN=PTPRN PE=1 SV=1	17	14	148
0.835073	0.458905	1.09551	0.75253	-0.366697	-0.0960527	1.13735	0.0666348	-0.673037	0.684803	0.653294	0.462441	1.80234	0.212334	1.32207	-0.0458595	-1.79986	-0.513104	1.34321	-0.506233	0.0823083	-0.380433	0.0705142	0.29961	-0.626004	0.622144	-0.395697	0.529494	-0.24907	-0.266221	0.632433	-0.218713	0.872558	0.781741	-0.503515	-1.00308	-1.06849	1.4244	0.244684	0.106604	1.14958	0.0708636	0.327651	-0.434784	A0A0C4DGI5	Protein FAM19A2 OS=Homo sapiens OX=9606 GN=FAM19A2 PE=1 SV=1	>tr|A0A0C4DGI5|A0A0C4DGI5_HUMAN Protein FAM19A2 OS=Homo sapiens OX=9606 GN=FAM19A2 PE=1 SV=1	47	5	35
-0.676252	-0.75546	-0.463443	-0.160222	-0.351477	0.0862392	-1.1402	0.0448646	0.00399191	0.153325	-0.806512	-0.299496	-0.826538	-0.245913	0.0741021	1.09525	0.688761	0.873549	-0.570079	1.38755	-0.0464619	0.0487831	0.354732	0.78702	-0.587637	-0.238941	0.337585	-0.35803	1.46498	0.00163585	0.0441636	1.12523	1.05718	0.0208354	0.555655	0.555886	0.423994	0.520248	-0.0504973	1.45267	1.22395	0.0597103	0.327661	0.394225	P30044	Peroxiredoxin-5, mitochondrial OS=Homo sapiens OX=9606 GN=PRDX5 PE=1 SV=4	>sp|P30044|PRDX5_HUMAN Peroxiredoxin-5, mitochondrial OS=Homo sapiens OX=9606 GN=PRDX5 PE=1 SV=4	16	3	14
0.568789	0.974436	1.58717	0.757093	0.022489	-0.891056	1.27647	0.713597	-0.447186	0.100793	-0.207542	1.78718	0.788048	1.12679	0.382811	2.03993	-0.703801	0.537803	1.07156	0.34311	0.593712	0.548921	0.625167	0.480737	0.888479	0.628937	-0.504193	0.530017	0.440231	-0.647178	1.14677	0.303006	1.2469	0.299673	-0.115465	-0.513425	-0.343046	1.04775	0.259418	0.81734	1.20468	0.0624189	0.327929	-0.402405	P05408	Neuroendocrine protein 7B2 OS=Homo sapiens OX=9606 GN=SCG5 PE=1 SV=2	>sp|P05408|7B2_HUMAN Neuroendocrine protein 7B2 OS=Homo sapiens OX=9606 GN=SCG5 PE=1 SV=2	54	10	298
0.60452	-0.0138146	0.712646	0.921166	0.248423	-0.26474	0.248778	0.482924	-0.614395	-0.275302	0.444343	-0.327635	-0.181386	-0.518571	0.107267	-0.707136	-0.806704	-0.912803	0.479777	-0.540637	-0.24906	-0.0832306	0.129885	-0.256837	0.100349	0.227725	-0.795557	0.384867	0.0299836	-0.522749	0.118338	-0.71881	-0.510555	0.336567	0.612689	-0.0203272	-0.114674	0.106061	-0.78422	-0.437997	1.46835	0.0340131	0.327969	-0.315671	Q9H467	CUE domain-containing protein 2 OS=Homo sapiens OX=9606 GN=CUEDC2 PE=1 SV=1	>sp|Q9H467|CUED2_HUMAN CUE domain-containing protein 2 OS=Homo sapiens OX=9606 GN=CUEDC2 PE=1 SV=1	18	3	6
NaN	NaN	NaN	NaN	NaN	NaN	NaN	NaN	NaN	NaN	-0.0383272	-0.548132	0.761267	-0.158717	0.590281	0.405216	0.912512	0.981568	0.167906	0.837344	NaN	NaN	NaN	NaN	NaN	NaN	NaN	NaN	NaN	NaN	NaN	NaN	NaN	NaN	NaN	NaN	NaN	NaN	NaN	NaN	0.998922	0.100248	0.330282	0.539635	P11940	Polyadenylate-binding protein 1 OS=Homo sapiens OX=9606 GN=PABPC1 PE=1 SV=2	>sp|P11940|PABP1_HUMAN Polyadenylate-binding protein 1 OS=Homo sapiens OX=9606 GN=PABPC1 PE=1 SV=2	2	1	3
0.487288	0.345072	0.16007	0.00354171	-0.534612	-0.169175	0.402348	-0.43058	-0.25618	0.231183	0.206374	-0.0574168	0.681042	-0.205701	0.581615	-0.217953	-0.702278	-0.36659	0.529783	-0.330448	0.683606	-0.217544	-0.0138588	-0.298393	0.242602	-0.051643	-1.02328	0.454753	-0.376956	-0.914891	0.509678	-0.604292	0.321159	0.781098	-0.304121	-0.922911	-0.919246	1.22226	0.249621	-0.346265	1.37498	0.042172	0.33031	-0.335283	O60245	Protocadherin-7 OS=Homo sapiens OX=9606 GN=PCDH7 PE=1 SV=2	>sp|O60245|PCDH7_HUMAN Protocadherin-7 OS=Homo sapiens OX=9606 GN=PCDH7 PE=1 SV=2	26	20	112
0.938988	-0.556297	-1.02594	-0.785196	-0.338168	-0.951085	-0.682289	-0.89327	-1.2351	-0.825827	NaN	NaN	NaN	NaN	NaN	NaN	NaN	NaN	NaN	NaN	-0.949367	0.992899	-0.853694	0.119305	0.163747	-0.0184882	-0.0654138	-1.18698	-0.851207	-0.483542	NaN	NaN	NaN	NaN	NaN	NaN	NaN	NaN	NaN	NaN	1.0512	0.0888785	0.331228	-0.489948	Q15417	Calponin-3 OS=Homo sapiens OX=9606 GN=CNN3 PE=1 SV=1	>sp|Q15417|CNN3_HUMAN Calponin-3 OS=Homo sapiens OX=9606 GN=CNN3 PE=1 SV=1	16	4	7
-0.19155	-0.301838	-1.081	-0.184259	0.0531536	1.21802	-0.344389	-0.0880239	0.973736	1.00816	0.441988	-0.377093	0.308362	-0.246862	1.0325	0.182733	1.06664	0.817255	-0.338389	0.941042	-0.389419	-0.21092	-0.254419	-0.576995	-0.607514	0.213071	0.851003	0.342604	-0.0696021	0.870221	-0.643877	-0.171722	0.732532	0.928856	1.16041	-1.11636	0.546944	-0.465427	0.420889	0.013603	1.23035	0.0588367	0.331399	0.38117	P06681	Complement C2 OS=Homo sapiens OX=9606 GN=C2 PE=1 SV=2	>sp|P06681|CO2_HUMAN Complement C2 OS=Homo sapiens OX=9606 GN=C2 PE=1 SV=2	54	35	620
-0.621429	-0.0240584	-1.56586	-1.26002	-1.28259	-0.507973	-0.723529	-0.82343	1.15434	0.276326	1.41256	-1.42735	-0.982694	-1.30453	-0.258958	-0.0520803	0.515427	0.835774	1.36233	0.397457	-1.50678	-0.199939	-0.46055	-0.178683	-1.71663	-1.68607	0.520469	-0.925593	0.0683635	2.6811	-1.62076	0.051244	0.320369	0.850134	2.33011	1.7223	0.215468	-1.05159	0.372636	-2.06687	0.969567	0.107259	0.332054	0.586564	P22792	Carboxypeptidase N subunit 2 OS=Homo sapiens OX=9606 GN=CPN2 PE=1 SV=3	>sp|P22792|CPN2_HUMAN Carboxypeptidase N subunit 2 OS=Homo sapiens OX=9606 GN=CPN2 PE=1 SV=3	25	11	104
-0.188994	-2.04434	-1.74981	-0.37255	-1.18964	-1.3756	1.19793	-1.03697	3.71914	-0.842377	2.88618	-0.263931	0.334533	0.21969	-0.399122	-0.543044	2.32667	-1.04738	1.20372	-1.09181	-3.18683	-0.544872	-0.8977	1.17407	-3.19474	-1.9139	-0.031943	-3.33903	2.03144	-0.710024	-2.16706	0.26225	-2.61109	0.806705	-0.280106	1.19169	1.43989	0.666492	1.16964	-0.827084	0.880665	0.131624	0.332269	0.77974	P01876	Immunoglobulin heavy constant alpha 1 OS=Homo sapiens OX=9606 GN=IGHA1 PE=1 SV=2	>sp|P01876|IGHA1_HUMAN Immunoglobulin heavy constant alpha 1 OS=Homo sapiens OX=9606 GN=IGHA1 PE=1 SV=2	64	19	1434
0.790798	0.761177	0.703694	0.599276	-0.0542738	-0.0579454	0.634467	-0.227942	-0.0325845	-0.300916	-0.773562	-0.0507269	0.979533	0.592969	0.220435	0.334864	-1.10001	0.133407	0.617826	-0.372129	1.02944	0.235651	0.61441	1.1262	0.527481	0.77205	-0.537355	0.822135	0.268059	0.0122952	0.846771	0.523065	0.774383	0.105424	0.00865008	-0.438635	0.0759659	0.641192	0.54579	1.08085	1.35613	0.0440418	0.334682	-0.33447	Q9UPU3	VPS10 domain-containing receptor SorCS3 OS=Homo sapiens OX=9606 GN=SORCS3 PE=1 SV=2	>sp|Q9UPU3|SORC3_HUMAN VPS10 domain-containing receptor SorCS3 OS=Homo sapiens OX=9606 GN=SORCS3 PE=1 SV=2	24	27	174
NaN	NaN	NaN	NaN	NaN	NaN	NaN	NaN	NaN	NaN	NaN	NaN	NaN	NaN	NaN	NaN	NaN	NaN	NaN	NaN	0.554201	0.0988843	0.435103	0.317568	1.19549	0.86483	1.53209	0.988191	0.851083	0.628221	-0.526499	-0.712645	-0.46658	-1.80841	-1.22467	-0.664226	-0.33418	-0.139228	-0.0560631	0.198259	0.948941	0.112476	0.335034	0.600654	P61956	Small ubiquitin-related modifier 2 OS=Homo sapiens OX=9606 GN=SUMO2 PE=1 SV=3	>sp|P61956|SUMO2_HUMAN Small ubiquitin-related modifier 2 OS=Homo sapiens OX=9606 GN=SUMO2 PE=1 SV=3	23	2	7
1.40533	0.536084	0.229694	-0.513386	-0.407042	0.0763344	-1.01496	0.882922	0.00759017	-0.541469	-0.464869	-0.733971	-0.914704	-0.751743	-0.370291	0.496526	0.0617005	-0.253112	-0.37148	1.01023	-0.504458	-0.603808	-0.266977	-0.63933	-0.622309	-0.536412	0.398092	-0.145621	0.972602	0.0490915	-0.251966	0.139854	-0.103525	-0.259953	-0.0329324	0.550235	0.209494	0.0715086	-0.440935	0.277533	1.3157	0.0483395	0.335093	0.344508	A0A087WYT3	Prostaglandin E synthase 3 OS=Homo sapiens OX=9606 GN=PTGES3 PE=1 SV=1	>tr|A0A087WYT3|A0A087WYT3_HUMAN Prostaglandin E synthase 3 OS=Homo sapiens OX=9606 GN=PTGES3 PE=1 SV=1	26	4	16
NaN	NaN	NaN	NaN	NaN	NaN	NaN	NaN	NaN	NaN	NaN	NaN	NaN	NaN	NaN	NaN	NaN	NaN	NaN	NaN	-0.929527	0.828828	-2.58258	-0.667972	-0.043824	0.565982	0.199419	-0.0277042	0.825352	-0.19819	NaN	NaN	NaN	NaN	NaN	NaN	NaN	NaN	NaN	NaN	0.829547	0.148065	0.335473	0.951988	Q14246	Adhesion G protein-coupled receptor E1 OS=Homo sapiens OX=9606 GN=ADGRE1 PE=2 SV=3	>sp|Q14246|AGRE1_HUMAN Adhesion G protein-coupled receptor E1 OS=Homo sapiens OX=9606 GN=ADGRE1 PE=2 SV=3	2	1	1
0.463858	0.606852	-0.57614	-0.109094	-0.201295	0.294683	-0.501588	0.406585	0.0761909	0.143709	0.257688	-1.22226	-0.626745	-0.975858	-0.391994	-0.622886	0.304094	-0.45818	-0.679997	0.575265	-0.39435	-0.10222	-0.381637	-0.506808	-0.498776	-0.265145	0.723672	-0.612612	1.18233	0.0264019	-0.380464	0.0512107	0.0978831	0.757111	0.385915	1.24845	0.4461	0.92535	-0.0396078	0.102113	1.29591	0.0505935	0.335801	0.351103	Q09666	Neuroblast differentiation-associated protein AHNAK OS=Homo sapiens OX=9606 GN=AHNAK PE=1 SV=2	>sp|Q09666|AHNK_HUMAN Neuroblast differentiation-associated protein AHNAK OS=Homo sapiens OX=9606 GN=AHNAK PE=1 SV=2	20	32	70
0.174478	0.181746	0.499979	0.25632	-0.146658	0.0759625	0.420216	0.313876	-0.3079	0.254772	0.646161	0.339372	0.651599	0.0633501	0.607621	-0.396526	-0.837808	-0.58193	0.48227	-0.576111	0.328798	0.275695	0.104252	0.361273	0.926716	0.52699	-0.160334	0.484359	0.264661	-0.157898	0.308585	-0.520824	0.428068	0.379991	-0.446526	-0.299273	-0.672282	0.839226	0.182716	-0.348973	1.51801	0.0303385	0.336265	-0.295699	Q9H8J5	MANSC domain-containing protein 1 OS=Homo sapiens OX=9606 GN=MANSC1 PE=2 SV=1	>sp|Q9H8J5|MANS1_HUMAN MANSC domain-containing protein 1 OS=Homo sapiens OX=9606 GN=MANSC1 PE=2 SV=1	21	6	68
-0.548788	-0.819928	-1.10376	-0.281429	-0.771386	-1.14008	-1.50467	-1.19058	1.64576	-1.08935	3.29802	-1.09955	0.286953	-2.05663	-0.710231	-1.20344	1.50083	0.429893	3.04438	-0.235555	-3.2197	-1.04459	-0.75053	0.917975	-2.80434	-0.622774	-0.599485	-1.70984	2.48649	-0.736519	-2.56837	1.00056	-2.27297	0.817583	-1.62351	1.12991	-0.142966	-0.844305	2.5799	-2.11811	0.880843	0.13157	0.336319	0.751704	A0A0G2JMB2	Immunoglobulin heavy constant alpha 2 (Fragment) OS=Homo sapiens OX=9606 GN=IGHA2 PE=1 SV=1	>tr|A0A0G2JMB2|A0A0G2JMB2_HUMAN Immunoglobulin heavy constant alpha 2 (Fragment) OS=Homo sapiens OX=9606 GN=IGHA2 PE=1 SV=1	71	16	799
0.502373	0.199486	1.09056	0.840285	0.92194	0.397432	0.654227	0.767394	0.337677	-0.175428	-0.22017	1.04028	-0.177576	0.754604	-0.179972	0.373358	-0.100509	0.402606	-0.0608086	-0.165282	0.561822	0.0770288	0.693602	0.910046	0.515806	-0.324105	0.106585	0.116958	0.352459	-0.168687	0.227184	0.911351	0.392943	-0.460371	-0.335753	-0.432687	-0.0139027	-0.075081	-0.0865544	0.465669	1.48405	0.032806	0.336364	-0.294707	Q9BRK5	45 kDa calcium-binding protein OS=Homo sapiens OX=9606 GN=SDF4 PE=1 SV=1	>sp|Q9BRK5|CAB45_HUMAN 45 kDa calcium-binding protein OS=Homo sapiens OX=9606 GN=SDF4 PE=1 SV=1	53	17	148
0.747707	-0.376213	1.30652	0.370227	0.00230195	0.161615	1.02289	0.493066	-0.517682	0.620687	0.370134	0.406071	1.45952	0.222166	1.34508	-0.386025	-1.84907	-0.278235	0.738597	-0.478899	0.0565145	0.0924429	-0.298521	0.155719	0.631979	0.290377	-0.620138	0.452456	-0.503334	-0.811583	0.0766299	-1.02372	0.456593	0.440224	-0.318532	-0.706817	-0.875809	1.17515	0.355957	-0.218532	1.15931	0.0692931	0.336392	-0.402908	Q92932	Receptor-type tyrosine-protein phosphatase N2 OS=Homo sapiens OX=9606 GN=PTPRN2 PE=1 SV=2	>sp|Q92932|PTPR2_HUMAN Receptor-type tyrosine-protein phosphatase N2 OS=Homo sapiens OX=9606 GN=PTPRN2 PE=1 SV=2	37	25	177
0.226919	0.234167	-0.040466	-0.0228776	0.517346	-0.737946	-0.554985	-0.816736	0.772482	-0.517657	-0.34082	0.148787	-0.220455	0.669417	-0.450737	-0.223099	0.0888821	0.327476	0.554067	0.0759574	1.54754	-0.807972	0.564353	0.94732	-0.371138	-0.411922	-0.883773	-0.0337885	-0.0967703	0.106259	0.307897	0.427794	0.477347	0.605246	-0.217072	-0.0811362	-0.215476	-0.451297	0.558732	0.0896646	1.34918	0.0447524	0.336508	-0.332683	P34059	N-acetylgalactosamine-6-sulfatase OS=Homo sapiens OX=9606 GN=GALNS PE=1 SV=1	>sp|P34059|GALNS_HUMAN N-acetylgalactosamine-6-sulfatase OS=Homo sapiens OX=9606 GN=GALNS PE=1 SV=1	33	14	62
NaN	NaN	NaN	NaN	NaN	NaN	NaN	NaN	NaN	NaN	NaN	NaN	NaN	NaN	NaN	NaN	NaN	NaN	NaN	NaN	-0.31919	9.46092	0.380585	2.01223	1.90858	-0.340135	1.24239	-0.272483	-0.365056	0.371738	NaN	NaN	NaN	NaN	NaN	NaN	NaN	NaN	NaN	NaN	0.726585	0.187679	0.336798	-2.56133	P19013	Keratin, type II cytoskeletal 4 OS=Homo sapiens OX=9606 GN=KRT4 PE=1 SV=4	>sp|P19013|K2C4_HUMAN Keratin, type II cytoskeletal 4 OS=Homo sapiens OX=9606 GN=KRT4 PE=1 SV=4	18	9	54
0.346118	0.370471	0.227099	-0.0434593	-0.206507	0.460837	1.09928	-0.00750621	0.468625	0.827104	NaN	NaN	NaN	NaN	NaN	NaN	NaN	NaN	NaN	NaN	NaN	NaN	NaN	NaN	NaN	NaN	NaN	NaN	NaN	NaN	NaN	NaN	NaN	NaN	NaN	NaN	NaN	NaN	NaN	NaN	1.07265	0.0845962	0.336854	0.430924	Q99805	Transmembrane 9 superfamily member 2 OS=Homo sapiens OX=9606 GN=TM9SF2 PE=1 SV=1	>sp|Q99805|TM9S2_HUMAN Transmembrane 9 superfamily member 2 OS=Homo sapiens OX=9606 GN=TM9SF2 PE=1 SV=1	2	1	1
0.187606	-0.463512	0.867472	0.928109	0.644305	-0.0629884	0.135522	0.325587	-0.668069	0.242565	-1.0084	0.89059	0.56885	0.705276	0.550685	0.0786406	-0.236083	0.32964	-0.348799	0.0651112	0.432016	-0.345422	1.06481	0.105114	1.27577	0.721329	-0.102669	-0.0233924	-0.411342	-0.335826	-0.0188254	0.00393652	0.148674	-0.483838	-0.317104	-0.580605	-0.294413	0.0761381	-0.111334	0.436482	1.34586	0.0450962	0.336892	-0.325031	Q9H772	Gremlin-2 OS=Homo sapiens OX=9606 GN=GREM2 PE=1 SV=1	>sp|Q9H772|GREM2_HUMAN Gremlin-2 OS=Homo sapiens OX=9606 GN=GREM2 PE=1 SV=1	11	2	15
0.0204055	0.301813	0.425276	-0.116194	-0.345159	0.175953	0.593164	0.246886	0.0291235	0.0113987	-0.40607	-0.565665	-0.107352	-0.638957	0.160688	-0.472324	-0.285106	-0.123539	0.506069	0.335075	-0.133288	-0.158612	-0.372179	-0.671889	0.0719792	0.416153	0.597529	0.609415	0.330214	-0.281504	0.489248	-0.8852	0.0868845	-0.112195	-0.651976	-0.536478	-0.727287	0.578175	0.291305	-0.14141	1.55344	0.0279616	0.337066	0.288063	E9PL57	NEDD8-MDP1 readthrough (Fragment) OS=Homo sapiens OX=9606 GN=NEDD8-MDP1 PE=4 SV=1	>tr|E9PL57|E9PL57_HUMAN NEDD8-MDP1 readthrough (Fragment) OS=Homo sapiens OX=9606 GN=NEDD8-MDP1 PE=4 SV=1	17	3	7
0.262169	0.153183	-0.165253	-0.133461	0.50245	0.687751	1.12511	0.102097	0.0137624	-0.107022	0.395341	-0.806156	-0.032579	-0.0786075	-0.175584	0.427308	0.518745	0.50004	-0.179905	0.817952	0.232812	0.220408	0.132256	-0.209803	0.157389	0.565814	0.49139	-0.112446	0.189252	0.299152	-0.271466	-0.0381822	0.367839	-0.0035898	0.231494	0.591051	0.274154	-0.00650825	-0.0685584	-0.159763	1.76053	0.0173568	0.337331	0.261436	O95881	Thioredoxin domain-containing protein 12 OS=Homo sapiens OX=9606 GN=TXNDC12 PE=1 SV=1	>sp|O95881|TXD12_HUMAN Thioredoxin domain-containing protein 12 OS=Homo sapiens OX=9606 GN=TXNDC12 PE=1 SV=1	31	4	13
0.305731	0.772215	0.61567	0.772819	0.187646	-0.106765	0.79117	0.18286	-0.477997	-0.174817	-0.13778	0.238342	0.525946	0.22932	0.0962736	-0.327852	-0.772893	-0.582624	0.17767	0.137387	0.381931	-0.0318017	0.0126123	-0.0932799	0.619001	0.397661	-0.470825	0.200431	0.160238	-0.409137	1.07596	-0.41555	0.315178	-0.533202	-0.222094	-1.03125	-0.8713	0.871798	0.248033	0.426324	1.37715	0.0419616	0.33737	-0.317341	P14621	Acylphosphatase-2 OS=Homo sapiens OX=9606 GN=ACYP2 PE=1 SV=2	>sp|P14621|ACYP2_HUMAN Acylphosphatase-2 OS=Homo sapiens OX=9606 GN=ACYP2 PE=1 SV=2	57	8	55
NaN	NaN	NaN	NaN	NaN	NaN	NaN	NaN	NaN	NaN	NaN	NaN	NaN	NaN	NaN	NaN	NaN	NaN	NaN	NaN	NaN	NaN	NaN	NaN	NaN	NaN	NaN	NaN	NaN	NaN	1.28478	-0.0584744	1.09771	-0.445601	-0.788308	-0.984794	-0.894754	0.549705	-0.922382	-0.760834	0.8424	0.143747	0.337937	-0.820633	O76080	AN1-type zinc finger protein 5 OS=Homo sapiens OX=9606 GN=ZFAND5 PE=1 SV=1	>sp|O76080|ZFAN5_HUMAN AN1-type zinc finger protein 5 OS=Homo sapiens OX=9606 GN=ZFAND5 PE=1 SV=1	19	2	3
NaN	NaN	NaN	NaN	NaN	NaN	NaN	NaN	NaN	NaN	-0.0205607	-0.575036	-0.166759	-0.323279	-0.403757	0.829922	0.428809	0.693187	-0.861525	0.226022	NaN	NaN	NaN	NaN	NaN	NaN	NaN	NaN	NaN	NaN	NaN	NaN	NaN	NaN	NaN	NaN	NaN	NaN	NaN	NaN	0.948635	0.112555	0.337963	0.561162	Q96JP9	Cadherin-related family member 1 OS=Homo sapiens OX=9606 GN=CDHR1 PE=1 SV=2	>sp|Q96JP9|CDHR1_HUMAN Cadherin-related family member 1 OS=Homo sapiens OX=9606 GN=CDHR1 PE=1 SV=2	3	2	2
0.249294	0.238737	0.338923	0.548486	0.123871	0.267112	0.830161	0.424822	-0.548958	-0.330615	0.497794	0.123266	0.152342	0.37394	0.6922	-0.453026	-1.26127	-0.737792	0.0618154	-0.371456	0.161023	0.0800864	-0.356409	-0.401966	0.355593	0.0768856	-0.389846	0.225266	0.360072	-0.674649	0.368123	-1.30571	-0.0503481	-0.098943	-0.742167	-1.47096	-1.48356	0.566295	-0.488693	-0.326119	1.25134	0.0560607	0.337982	-0.353632	E9PR17	CD59 glycoprotein OS=Homo sapiens OX=9606 PE=1 SV=1	>tr|E9PR17|E9PR17_HUMAN CD59 glycoprotein OS=Homo sapiens OX=9606 PE=1 SV=1	37	5	94
-0.232642	0.0988217	-0.558365	-0.943276	-1.13557	0.55973	-0.384613	0.293535	0.0831011	1.68706	NaN	NaN	NaN	NaN	NaN	NaN	NaN	NaN	NaN	NaN	0.368313	0.414828	-0.153743	0.681748	0.802654	0.669449	0.672342	0.226192	0.239578	0.0022847	-0.52983	-0.0741974	-0.208841	0.151717	-0.108085	0.713113	0.0158445	-0.645535	0.231505	-0.0368173	1.18788	0.0648809	0.338262	0.383549	P54920	Alpha-soluble NSF attachment protein OS=Homo sapiens OX=9606 GN=NAPA PE=1 SV=3	>sp|P54920|SNAA_HUMAN Alpha-soluble NSF attachment protein OS=Homo sapiens OX=9606 GN=NAPA PE=1 SV=3	19	4	10
0.662497	0.302676	0.941659	-0.024089	-0.78361	-0.784709	0.0451089	-0.373844	-0.738128	-0.35481	-0.20209	0.812512	1.60356	-0.25887	0.185585	-0.52833	-0.931792	-0.450828	-0.503372	-1.10327	-0.117035	-0.450953	0.22992	-0.576977	-0.24358	0.184726	0.00900114	0.525547	0.350676	-0.893718	0.0357332	0.24786	2.26801	1.20135	0.875545	0.606924	0.279649	-0.279616	2.22304	0.725955	1.08713	0.0818213	0.338362	-0.435074	P55289	Cadherin-12 OS=Homo sapiens OX=9606 GN=CDH12 PE=2 SV=2	>sp|P55289|CAD12_HUMAN Cadherin-12 OS=Homo sapiens OX=9606 GN=CDH12 PE=2 SV=2	12	7	12
0.323886	0.483552	0.812376	0.648296	0.679169	0.349981	0.814893	0.810279	0.153656	0.333112	0.741559	0.680795	0.478928	0.431142	0.772172	0.0708622	0.0156768	-0.0445619	0.384524	-0.0872747	0.0841585	0.107819	0.494698	0.140943	0.434435	0.487284	0.320163	0.293298	0.308274	-0.414266	0.966873	0.471643	1.06868	-0.0478535	-0.247726	-0.374248	0.129528	0.401133	-0.211159	0.521932	1.72713	0.0187445	0.338421	-0.263123	Q14118	Dystroglycan OS=Homo sapiens OX=9606 GN=DAG1 PE=1 SV=2	>sp|Q14118|DAG1_HUMAN Dystroglycan OS=Homo sapiens OX=9606 GN=DAG1 PE=1 SV=2	33	23	335
-0.029688	0.746924	0.430099	0.552444	0.0191188	-0.131487	0.58818	0.623704	0.674685	-0.0600479	0.393731	-0.00334504	1.02851	0.228695	0.250508	-0.160282	-0.0858763	-0.698573	-0.587207	-0.0427495	1.06091	0.507024	0.144855	-0.0310596	0.745765	0.673271	0.89233	0.289355	-0.138683	-0.711596	0.237767	0.386007	0.559877	0.415217	-0.337969	-0.541594	-0.385142	0.532391	-0.000189883	0.503604	1.4572	0.0348978	0.338557	-0.303565	P02751	Fibronectin OS=Homo sapiens OX=9606 GN=FN1 PE=1 SV=4	>sp|P02751|FINC_HUMAN Fibronectin OS=Homo sapiens OX=9606 GN=FN1 PE=1 SV=4	57	96	3010
0.13516	-0.0446479	0.110966	0.781374	-0.803493	0.0880019	-0.0457058	-0.591624	-0.0762409	-0.349984	-0.223436	0.206638	-0.426505	-0.607606	-0.275817	-0.501886	-0.217301	-0.50936	-0.728537	-0.494469	0.724957	-0.0269245	0.976412	0.203225	0.0655929	0.459437	-0.410266	0.188484	-0.294296	-0.458468	0.654896	0.259215	-0.496762	0.476244	-0.842392	-0.847938	0.0288561	-0.449575	-0.0312052	0.0305605	1.45838	0.0348029	0.338612	-0.302931	Q86WC4	Osteopetrosis-associated transmembrane protein 1 OS=Homo sapiens OX=9606 GN=OSTM1 PE=1 SV=1	>sp|Q86WC4|OSTM1_HUMAN Osteopetrosis-associated transmembrane protein 1 OS=Homo sapiens OX=9606 GN=OSTM1 PE=1 SV=1	10	3	9
0.198422	-0.176026	-1.28425	-0.11191	-0.136119	0.288714	-1.08143	-0.789678	1.38616	0.56077	0.449731	-1.23842	0.0931064	-0.891357	-0.237102	0.453495	1.46405	1.29353	0.239663	0.368413	-1.34321	-1.9023	0.174272	-0.229768	-1.12729	-1.06607	-0.63578	-0.222997	-0.882861	0.91087	-1.7194	0.234542	0.245174	0.426877	0.962298	0.405781	0.763025	-0.947768	0.133692	-1.01407	1.05442	0.0882219	0.338736	0.462011	P07357	Complement component C8 alpha chain OS=Homo sapiens OX=9606 GN=C8A PE=1 SV=2	>sp|P07357|CO8A_HUMAN Complement component C8 alpha chain OS=Homo sapiens OX=9606 GN=C8A PE=1 SV=2	56	21	277
0.307935	0.535405	0.139216	0.316122	0.104029	0.245569	0.159667	0.55399	-1.02563	0.144998	-0.219581	1.19249	0.307969	0.336067	-0.449163	1.59414	-0.764428	-0.0306221	0.180202	0.115917	NaN	NaN	NaN	NaN	NaN	NaN	NaN	NaN	NaN	NaN	0.435529	0.321726	0.350852	0.717499	1.73724	0.0779305	-0.0375516	-0.318941	0.0667152	-0.721854	1.15774	0.069544	0.338965	-0.392882	Q8TCD5	5'(3')-deoxyribonucleotidase, cytosolic type OS=Homo sapiens OX=9606 GN=NT5C PE=1 SV=2	>sp|Q8TCD5|NT5C_HUMAN 5'(3')-deoxyribonucleotidase, cytosolic type OS=Homo sapiens OX=9606 GN=NT5C PE=1 SV=2	26	4	6
0.271249	0.26732	-0.87667	-1.11769	-0.465528	-0.16728	0.213692	-0.29381	1.81195	-1.36787	-1.04529	-0.853014	-1.50866	-0.681238	1.37394	0.485413	-0.853941	0.864353	-0.419018	-0.409778	-0.965224	-1.12998	-1.54047	-0.894827	-0.590007	-1.81371	-0.120105	-1.71532	0.61453	1.95372	NaN	NaN	NaN	NaN	NaN	NaN	NaN	NaN	NaN	NaN	0.934044	0.116401	0.339069	0.569262	Q92496	Complement factor H-related protein 4 OS=Homo sapiens OX=9606 GN=CFHR4 PE=1 SV=3	>sp|Q92496|FHR4_HUMAN Complement factor H-related protein 4 OS=Homo sapiens OX=9606 GN=CFHR4 PE=1 SV=3	20	8	36
-0.269326	-0.837932	-0.846043	0.0908503	-0.183869	-1.2421	-0.5316	0.125293	-0.178658	-0.688197	1.4057	-0.459146	-1.06818	-0.788575	-0.89282	-1.85727	0.171884	-1.40264	-2.02849	-0.544365	-0.558926	-0.222475	-0.955758	0.997173	-0.220389	-0.178823	-0.424148	-0.688871	-0.955051	0.133309	-1.54838	0.390603	-0.623053	2.31841	-0.359605	0.561311	-0.474777	-1.30529	-1.41504	-0.686612	1.04746	0.0896473	0.339094	-0.44892	Q8WWA0	Intelectin-1 OS=Homo sapiens OX=9606 GN=ITLN1 PE=1 SV=1	>sp|Q8WWA0|ITLN1_HUMAN Intelectin-1 OS=Homo sapiens OX=9606 GN=ITLN1 PE=1 SV=1	14	3	6
0.2682	0.77549	-0.125326	-0.170742	-0.0254451	-0.102549	0.158343	0.140062	0.439177	0.744495	1.42971	-0.715941	-0.222394	-1.42863	-0.228578	0.704079	3.67215	-0.463892	1.04407	0.0526635	-0.464133	0.0364964	-0.276773	-0.589508	-0.475573	-0.602052	0.130337	-0.517119	-0.0405641	-0.489637	0.448052	-0.351223	-0.908214	0.307868	-0.24775	0.715871	-0.189131	-0.0236511	0.360069	0.0914225	1.08181	0.0828302	0.339148	0.439427	O43396	Thioredoxin-like protein 1 OS=Homo sapiens OX=9606 GN=TXNL1 PE=1 SV=3	>sp|O43396|TXNL1_HUMAN Thioredoxin-like protein 1 OS=Homo sapiens OX=9606 GN=TXNL1 PE=1 SV=3	37	7	16
0.924552	0.0939874	2.05097	0.84248	0.26567	0.504225	1.03783	0.215286	-0.749898	0.446863	-0.404626	1.56145	0.261077	1.43423	0.917735	0.510802	-1.07298	-0.383653	0.313805	-0.648939	-0.190747	-0.336186	-0.162827	0.282611	0.392697	0.168696	-0.316757	0.199432	0.020617	0.0387946	1.25749	-0.591488	0.77346	0.513628	0.298845	-0.224267	-0.390021	1.00587	0.989631	0.76826	1.15584	0.0698495	0.339154	-0.38757	P21554	Cannabinoid receptor 1 OS=Homo sapiens OX=9606 GN=CNR1 PE=1 SV=1	>sp|P21554|CNR1_HUMAN Cannabinoid receptor 1 OS=Homo sapiens OX=9606 GN=CNR1 PE=1 SV=1	11	5	21
0.141352	0.119513	0.954794	0.722221	0.209712	-0.0958694	0.358129	-0.0712142	-0.210953	-0.0661405	-0.39873	0.341081	1.19302	-0.373532	0.435355	-0.186559	-0.00584057	1.16579	0.66537	-0.100587	0.430745	-0.232047	0.830494	-0.00594191	0.945938	0.658182	-0.317005	0.168426	-0.369893	0.000643031	1.02286	0.442732	0.693989	0.0711918	0.145054	-0.644403	-0.298942	0.392085	0.0282476	0.531074	1.40878	0.0390139	0.339234	-0.304463	O75173	A disintegrin and metalloproteinase with thrombospondin motifs 4 OS=Homo sapiens OX=9606 GN=ADAMTS4 PE=1 SV=3	>sp|O75173|ATS4_HUMAN A disintegrin and metalloproteinase with thrombospondin motifs 4 OS=Homo sapiens OX=9606 GN=ADAMTS4 PE=1 SV=3	14	7	66
-1.58871	-0.781155	-0.770499	-1.74697	-0.139084	0.502811	0.0231566	0.219634	-1.11878	-0.547533	NaN	NaN	NaN	NaN	NaN	NaN	NaN	NaN	NaN	NaN	NaN	NaN	NaN	NaN	NaN	NaN	NaN	NaN	NaN	NaN	-0.0770295	1.16846	-0.930296	-1.21832	-0.8525	-0.787634	0.0203096	0.338044	-0.539639	0.315787	0.957825	0.110198	0.339314	0.536226	M0R0P0	CD209 antigen, isoform CRA_b OS=Homo sapiens OX=9606 GN=CD209 PE=1 SV=1	>tr|M0R0P0|M0R0P0_HUMAN CD209 antigen, isoform CRA_b OS=Homo sapiens OX=9606 GN=CD209 PE=1 SV=1	19	4	7
1.18901	0.629808	0.854421	0.676356	0.540523	0.225173	0.641548	-0.244737	0.778092	0.250713	0.399929	-0.461574	0.00953521	0.328806	0.0231268	-0.357643	-0.26852	0.0948292	0.217057	-0.476239	0.451449	-0.790126	0.524243	0.414481	0.178428	-0.168107	-0.70621	-0.021183	-0.590661	-0.215948	0.282056	0.215099	0.357286	0.128537	0.21618	0.0709681	0.132836	0.379402	0.415126	0.230412	1.48313	0.0328753	0.339552	-0.289034	Q9ULL4	Plexin-B3 OS=Homo sapiens OX=9606 GN=PLXNB3 PE=1 SV=2	>sp|Q9ULL4|PLXB3_HUMAN Plexin-B3 OS=Homo sapiens OX=9606 GN=PLXNB3 PE=1 SV=2	17	19	67
NaN	NaN	NaN	NaN	NaN	NaN	NaN	NaN	NaN	NaN	NaN	NaN	NaN	NaN	NaN	NaN	NaN	NaN	NaN	NaN	-0.987008	-0.00906102	-0.414702	-0.524976	-1.02488	-0.140013	0.136461	-0.519007	-0.407484	0.31939	NaN	NaN	NaN	NaN	NaN	NaN	NaN	NaN	NaN	NaN	1.02888	0.0935669	0.339562	0.469995	A0A0D9SGF6	Spectrin alpha chain, non-erythrocytic 1 OS=Homo sapiens OX=9606 GN=SPTAN1 PE=1 SV=1	>tr|A0A0D9SGF6|A0A0D9SGF6_HUMAN Spectrin alpha chain, non-erythrocytic 1 OS=Homo sapiens OX=9606 GN=SPTAN1 PE=1 SV=1	2	4	6
0.521988	-0.544255	0.598951	0.602584	0.112325	-0.199556	-0.0434227	-1.01573	0.808239	-1.15784	1.30232	0.495406	0.0780428	0.746478	-0.551317	-0.389948	0.307787	0.738131	0.0399355	0.277471	0.970572	-0.231377	1.22656	0.166764	0.49832	0.924608	-0.360021	0.497549	-0.512188	0.598926	0.781877	0.941695	0.554356	-0.384992	0.0458204	-0.178593	-0.0810859	-0.294215	0.511993	0.45705	1.24785	0.056513	0.33958	-0.350151	A0A1W2PQ11	Contactin-2 OS=Homo sapiens OX=9606 GN=CNTN2 PE=1 SV=1	>tr|A0A1W2PQ11|A0A1W2PQ11_HUMAN Contactin-2 OS=Homo sapiens OX=9606 GN=CNTN2 PE=1 SV=1	49	37	627
4.86242	-0.29253	0.635213	-0.171216	-0.208241	-0.387824	-0.330874	-0.574303	-0.835839	-0.566025	-0.0117991	-0.180359	-0.333318	-0.257902	0.396626	-0.549804	-0.183677	-0.848286	-0.415867	-0.900321	-0.250315	-0.604325	-0.0942024	-0.51458	0.0105874	-0.148131	-0.285499	-0.202263	-0.360216	-0.56874	-0.740376	-0.289105	-0.584517	-1.46877	-1.2726	-1.06981	-1.10121	-0.552075	-0.252916	-1.04461	1.00921	0.0979014	0.339767	-0.49045	Q9BS26	Endoplasmic reticulum resident protein 44 OS=Homo sapiens OX=9606 GN=ERP44 PE=1 SV=1	>sp|Q9BS26|ERP44_HUMAN Endoplasmic reticulum resident protein 44 OS=Homo sapiens OX=9606 GN=ERP44 PE=1 SV=1	27	9	45
0.377834	4.14661	-1.20654	-0.886184	-1.43445	-0.105108	-1.53047	1.60435	-1.91035	-1.01386	-0.305374	-2.36372	-1.21721	-1.00272	-0.824291	-1.73867	0.503293	-2.24552	-1.18617	-0.4887	-1.04999	-1.73108	-1.72297	-2.40679	-2.85038	-1.56148	-0.881754	-0.663227	2.50102	1.69709	-1.66236	-0.637781	-0.490336	-0.926113	-1.33685	1.67331	-1.84745	5.02903	-2.10734	0.542819	0.842887	0.143586	0.339835	0.790074	P08670	Vimentin OS=Homo sapiens OX=9606 GN=VIM PE=1 SV=4	>sp|P08670|VIME_HUMAN Vimentin OS=Homo sapiens OX=9606 GN=VIM PE=1 SV=4	57	27	129
0.777416	0.23685	0.778771	0.19918	-0.280828	-0.423424	0.987297	-0.297644	-0.429316	0.225703	-0.625111	0.664415	0.00503242	0.16392	0.404863	-1.23	-1.89962	-0.987659	0.227247	-0.513507	0.14046	-0.923911	-0.461927	-0.277783	-0.235757	0.103855	-1.37594	-0.133667	-0.955787	-0.637511	-0.401389	-0.750404	-0.513226	-0.246718	-0.654879	-0.955485	-1.25092	-0.112433	0.272057	0.00493584	1.19496	0.063832	0.339892	-0.36904	Q9Y6N8	Cadherin-10 OS=Homo sapiens OX=9606 GN=CDH10 PE=1 SV=2	>sp|Q9Y6N8|CAD10_HUMAN Cadherin-10 OS=Homo sapiens OX=9606 GN=CDH10 PE=1 SV=2	21	14	101
-2.75675	-0.468884	-0.431589	-0.665012	1.39115	-2.47121	-2.58632	-0.232515	-2.43183	-0.980271	-1.12131	2.13028	1.05841	1.71768	1.72129	1.24041	-1.32533	0.949315	-0.734484	1.71149	-0.126395	1.57959	1.29791	2.47553	0.556529	1.41686	-0.264854	-1.48801	-1.24542	0.121619	1.65195	1.45863	-0.21569	-0.658221	-1.6332	-1.31394	4.78808	0.0681927	-1.63549	0.191906	0.853162	0.140229	0.339964	-0.759186	P13647	Keratin, type II cytoskeletal 5 OS=Homo sapiens OX=9606 GN=KRT5 PE=1 SV=3	>sp|P13647|K2C5_HUMAN Keratin, type II cytoskeletal 5 OS=Homo sapiens OX=9606 GN=KRT5 PE=1 SV=3	45	35	290
-0.0256739	-1.41133	-1.00491	-0.0635674	-0.626994	0.913284	-1.07722	0.489262	-0.0936017	0.885302	-1.54288	-1.8681	0.856262	-0.526875	-0.360976	0.461777	0.794516	1.24263	-0.0189084	0.401587	-0.65647	-0.0199678	0.0740747	-1.26801	-0.272704	-0.272837	1.22172	0.467792	-0.0983415	2.07393	-0.805211	0.89522	0.286669	0.261744	1.71932	0.228005	-0.0957783	-1.06755	-0.728285	-2.20397	0.998783	0.100281	0.340108	0.494185	P55103	Inhibin beta C chain OS=Homo sapiens OX=9606 GN=INHBC PE=2 SV=1	>sp|P55103|INHBC_HUMAN Inhibin beta C chain OS=Homo sapiens OX=9606 GN=INHBC PE=2 SV=1	8	2	11
NaN	NaN	NaN	NaN	NaN	NaN	NaN	NaN	NaN	NaN	-0.204428	-0.920183	-1.00284	-0.57985	-0.1455	-0.074621	0.421446	-0.173367	0.307717	0.524089	NaN	NaN	NaN	NaN	NaN	NaN	NaN	NaN	NaN	NaN	-1.07049	0.288985	-1.01998	-0.184189	-0.340344	0.0722103	0.227236	-0.531502	-0.0544295	-1.53055	1.06712	0.08568	0.340109	0.436706	A0A087WVQ6	Clathrin heavy chain OS=Homo sapiens OX=9606 GN=CLTC PE=1 SV=1	>tr|A0A087WVQ6|A0A087WVQ6_HUMAN Clathrin heavy chain OS=Homo sapiens OX=9606 GN=CLTC PE=1 SV=1	5	6	9
-0.898699	-0.480353	-0.116759	-0.500536	0.368689	0.938236	-0.778332	0.540717	0.0671793	-0.249081	-0.0886983	-0.200726	-0.707556	0.714935	-0.39456	0.668606	0.863779	0.534096	-0.432887	0.261487	NaN	NaN	NaN	NaN	NaN	NaN	NaN	NaN	NaN	NaN	0.693205	0.801579	0.923391	-0.679107	-0.0129431	0.886229	0.776123	0.100368	0.146158	0.948395	1.14435	0.0717208	0.340512	0.389947	O14657	Torsin-1B OS=Homo sapiens OX=9606 GN=TOR1B PE=1 SV=2	>sp|O14657|TOR1B_HUMAN Torsin-1B OS=Homo sapiens OX=9606 GN=TOR1B PE=1 SV=2	10	3	6
0.192687	0.73499	-0.500835	0.676822	-0.491262	-0.0544217	0.1007	-0.124407	0.391116	0.689659	-0.204897	0.448549	-1.48796	-0.461014	0.878704	-1.09336	1.12875	0.797242	0.878672	-0.200679	-0.338111	-0.338646	-0.570411	-0.00240614	0.275452	0.258423	-0.0323872	0.0782453	-0.280968	0.985519	-0.391933	-0.351792	-0.24039	0.877935	0.42106	0.0401076	1.51588	0.462159	1.01359	-0.148801	1.17987	0.0660886	0.341766	0.363925	P11597	Cholesteryl ester transfer protein OS=Homo sapiens OX=9606 GN=CETP PE=1 SV=2	>sp|P11597|CETP_HUMAN Cholesteryl ester transfer protein OS=Homo sapiens OX=9606 GN=CETP PE=1 SV=2	20	9	47
-0.699799	-0.401928	0.350948	-0.242078	0.548408	-0.308582	-0.892091	0.183692	0.490842	0.0452555	-0.470783	0.471208	-0.579734	0.741241	-0.75427	1.20667	1.12594	2.31539	-0.184189	0.677857	0.705745	0.246237	0.901436	-0.399705	0.00710161	0.809706	0.513618	-0.0389772	0.0833181	0.674379	-0.250357	0.590313	-0.277172	-0.467375	0.0541324	-0.0253757	0.952084	-1.05966	0.267797	0.889305	1.13958	0.0725137	0.342039	0.382671	P61812	Transforming growth factor beta-2 OS=Homo sapiens OX=9606 GN=TGFB2 PE=1 SV=1	>sp|P61812|TGFB2_HUMAN Transforming growth factor beta-2 OS=Homo sapiens OX=9606 GN=TGFB2 PE=1 SV=1	18	6	28
0.193598	-0.315024	0.739678	0.219504	-0.177536	-0.394938	0.0458415	-0.158331	-0.746356	0.665918	-0.0943633	1.47063	1.07412	0.547859	1.23824	-0.10581	-0.650824	-0.604242	0.710958	-0.155374	-0.203946	0.386872	-0.325748	0.745161	0.593615	-0.267682	-0.63975	-0.115847	0.0281427	0.0645321	-0.0613777	-1.42869	-0.100875	0.103107	-0.422189	-1.02964	-1.5873	1.17379	0.729232	-0.475358	1.13372	0.0734982	0.342245	-0.384784	A0A2R8YD46	Amino acid transporter OS=Homo sapiens OX=9606 GN=SLC1A2 PE=1 SV=1	>tr|A0A2R8YD46|A0A2R8YD46_HUMAN Amino acid transporter OS=Homo sapiens OX=9606 GN=SLC1A2 PE=1 SV=1	5	3	10
0.364354	0.162932	-0.105237	-0.71196	0.432126	0.26887	0.354283	-0.00574114	0.27339	0.50065	0.423856	-0.138837	0.00333483	0.116423	0.46256	-0.379713	0.499819	0.080292	-1.02382	0.66056	-0.592856	-1.34826	-0.199475	-0.114063	-1.31896	0.494809	0.869747	0.611106	1.27142	0.0480685	-0.100622	-0.627065	0.227536	0.649033	0.914307	0.397692	0.253105	-0.204996	0.348508	-0.0393688	1.25086	0.0561232	0.342267	0.338978	171	GSTP1_HUMAN	>gi|171| GSTP1_HUMAN	65	12	95
1.2005	0.506612	1.04118	0.607447	-0.263934	-0.739639	0.759561	0.739217	-0.418695	-0.232479	-0.0956883	-0.0764042	-0.165988	0.407054	0.225627	0.693552	-1.65875	-0.684247	1.21426	-0.122836	0.442581	-0.03121	0.296714	0.243749	0.995949	0.848179	-0.0339829	0.372116	0.194842	-0.549436	0.127797	0.742828	0.560254	-0.175272	0.662528	-0.751891	0.285739	-0.0763302	0.242628	0.160213	1.21208	0.0613653	0.342272	-0.350515	Q08431	Lactadherin OS=Homo sapiens OX=9606 GN=MFGE8 PE=1 SV=2	>sp|Q08431|MFGM_HUMAN Lactadherin OS=Homo sapiens OX=9606 GN=MFGE8 PE=1 SV=2	65	19	146
-0.090186	-0.0758151	0.190693	0.278565	0.189763	-0.0819113	-0.0221197	-0.221469	0.0548763	-0.109191	0.363847	0.115335	0.0961664	0.0916252	0.174493	-0.433047	0.100106	-0.143295	0.00416826	-0.395508	0.268893	-0.187041	0.231887	0.19707	0.361225	0.160531	-0.0589949	0.336774	-0.31497	-0.0450057	-0.109397	-0.145371	-0.153183	-0.267652	0.0447968	-0.482317	-0.0337957	-0.494105	0.0104021	-0.432352	2.45465	0.00351034	0.342305	-0.208847	P11717	Cation-independent mannose-6-phosphate receptor OS=Homo sapiens OX=9606 GN=IGF2R PE=1 SV=3	>sp|P11717|MPRI_HUMAN Cation-independent mannose-6-phosphate receptor OS=Homo sapiens OX=9606 GN=IGF2R PE=1 SV=3	31	63	221
-0.448487	0.221219	-0.937463	-1.03534	-0.0563857	-0.0292186	-0.160851	-0.0685774	-0.0955701	-0.337502	-0.40007	-0.687434	-1.19037	0.216528	-0.743367	-0.824813	0.601245	0.244738	-0.757746	0.389941	-0.48211	-0.116731	-0.144143	-0.105078	-0.185861	-0.410979	0.171988	0.188713	0.56223	0.24203	0.257753	0.416884	-0.222395	0.843381	0.365617	1.23285	-0.251077	-0.329983	0.358731	2.06151	1.19522	0.063794	0.342591	0.361075	H0Y8X4	2'-deoxynucleoside 5'-phosphate N-hydrolase 1 (Fragment) OS=Homo sapiens OX=9606 GN=DNPH1 PE=1 SV=1	>tr|H0Y8X4|H0Y8X4_HUMAN 2'-deoxynucleoside 5'-phosphate N-hydrolase 1 (Fragment) OS=Homo sapiens OX=9606 GN=DNPH1 PE=1 SV=1	21	4	9
-0.0976774	-0.4938	-1.37412	0.718084	0.096288	1.15021	-0.708214	-0.476055	1.22731	1.45183	0.0792179	-0.420046	0.182104	0.261945	0.644302	-0.0763983	1.25722	1.05846	0.118345	1.05794	-0.821238	-0.39526	-0.303656	-0.355853	-0.63168	-0.137374	0.882882	0.39168	0.0209116	0.757887	-0.29306	-0.00135236	1.1483	0.172515	0.6686	-0.460327	0.602076	-0.65297	-0.13942	-0.753383	1.13041	0.0740604	0.342643	0.389449	B4E1Z4	cDNA FLJ55673, highly similar to Complement factor B (EC 3.4.21.47) OS=Homo sapiens OX=9606 PE=1 SV=1	>tr|B4E1Z4|B4E1Z4_HUMAN cDNA FLJ55673, highly similar to Complement factor B (EC 3.4.21.47) OS=Homo sapiens OX=9606 PE=1 SV=1	56	67	1776
-0.541252	-0.322346	-0.726967	-0.398123	-0.582907	0.249282	-0.721352	-0.459883	0.361253	0.164834	NaN	NaN	NaN	NaN	NaN	NaN	NaN	NaN	NaN	NaN	NaN	NaN	NaN	NaN	NaN	NaN	NaN	NaN	NaN	NaN	NaN	NaN	NaN	NaN	NaN	NaN	NaN	NaN	NaN	NaN	1.03925	0.0913588	0.342791	0.433146	Q6UXN8	C-type lectin domain family 9 member A OS=Homo sapiens OX=9606 GN=CLEC9A PE=1 SV=1	>sp|Q6UXN8|CLC9A_HUMAN C-type lectin domain family 9 member A OS=Homo sapiens OX=9606 GN=CLEC9A PE=1 SV=1	17	3	5
0.029833	0.394405	-0.431907	0.152006	-0.610675	-0.132231	0.196131	-0.71523	-0.181304	0.401862	-0.239867	0.597173	0.0161075	1.14782	0.189522	0.230625	0.407775	-0.0832089	-0.786252	-0.150893	-0.369113	0.409768	-0.820396	-0.00217182	-0.987253	-0.664076	-0.413164	-1.86889	-0.466604	-0.932724	-0.0285378	0.40332	0.178239	1.05371	0.458903	0.26297	0.174523	-0.489487	0.288859	-0.395558	1.22517	0.0595428	0.343136	-0.342888	Q9Y219	Protein jagged-2 OS=Homo sapiens OX=9606 GN=JAG2 PE=1 SV=3	>sp|Q9Y219|JAG2_HUMAN Protein jagged-2 OS=Homo sapiens OX=9606 GN=JAG2 PE=1 SV=3	6	6	13
NaN	NaN	NaN	NaN	NaN	NaN	NaN	NaN	NaN	NaN	-2.55367	0.947154	-0.00233051	0.282398	-0.771983	0.479758	2.22073	2.3473	-0.089583	-0.563949	NaN	NaN	NaN	NaN	NaN	NaN	NaN	NaN	NaN	NaN	-0.372758	-0.020416	-0.0379926	0.548114	0.23037	1.17954	0.572054	-0.558978	0.228886	-0.496233	0.856826	0.139051	0.343225	0.707064	E7EUC7	UTP--glucose-1-phosphate uridylyltransferase OS=Homo sapiens OX=9606 GN=UGP2 PE=1 SV=1	>tr|E7EUC7|E7EUC7_HUMAN UTP--glucose-1-phosphate uridylyltransferase OS=Homo sapiens OX=9606 GN=UGP2 PE=1 SV=1	13	5	9
-0.411836	-0.913864	-0.777921	-0.653714	-0.219073	-0.567116	-0.612404	-0.749047	0.0948717	0.386726	1.14187	-0.117948	0.824748	0.512501	-0.0908884	-0.817554	0.0428458	-0.983737	-0.725635	-0.608533	1.02701	0.291393	1.07531	0.0226242	-0.243702	-0.420394	-0.550042	-0.0902518	-0.477688	-0.500676	-0.608935	0.251572	-0.605568	0.386818	-0.498956	0.337633	-0.985461	1.03595	-0.214603	-0.249465	1.19966	0.0631457	0.343315	-0.352301	P16284	Platelet endothelial cell adhesion molecule OS=Homo sapiens OX=9606 GN=PECAM1 PE=1 SV=2	>sp|P16284|PECA1_HUMAN Platelet endothelial cell adhesion molecule OS=Homo sapiens OX=9606 GN=PECAM1 PE=1 SV=2	11	6	17
1.50105	-0.869829	0.441034	1.23314	-0.594376	-1.46	0.69712	-1.78889	-1.49286	-1.16934	-1.37562	3.22478	-0.822596	2.97191	0.727953	-0.0676729	-0.89788	-0.0902477	0.488306	-0.88896	0.288376	-1.96168	0.25957	0.452019	1.06602	0.650677	-1.27627	0.939141	0.341591	-0.90973	0.582718	-1.09682	1.92679	-1.72874	-0.105632	0.0850966	0.364604	-0.349166	0.398694	0.731894	0.906324	0.124073	0.343471	-0.590699	Q05996	Zona pellucida sperm-binding protein 2 OS=Homo sapiens OX=9606 GN=ZP2 PE=1 SV=1	>sp|Q05996|ZP2_HUMAN Zona pellucida sperm-binding protein 2 OS=Homo sapiens OX=9606 GN=ZP2 PE=1 SV=1	19	13	75
-0.712781	0.147239	-0.580656	-0.436714	0.281167	1.43009	0.479128	0.437678	0.264153	1.68407	0.599432	-0.245488	-0.0265969	0.0447148	0.297845	0.57293	0.985755	0.663945	-0.343157	-0.128539	0.00365616	0.386931	0.815225	0.483841	0.7457	0.845187	0.437156	0.293324	0.372634	-0.391429	0.0245243	0.00740968	0.0151658	0.285769	0.502888	0.363383	0.291279	-0.0944776	0.194633	0.472214	1.36011	0.0436404	0.343577	0.309534	P50281	Matrix metalloproteinase-14 OS=Homo sapiens OX=9606 GN=MMP14 PE=1 SV=3	>sp|P50281|MMP14_HUMAN Matrix metalloproteinase-14 OS=Homo sapiens OX=9606 GN=MMP14 PE=1 SV=3	5	3	28
0.459043	0.129115	-0.0696453	-0.242753	-0.835178	-0.692544	0.334699	-1.01898	-1.01992	-0.361719	0.476724	0.128731	0.721336	0.137567	0.431274	-0.0574529	-0.776056	-0.218161	0.578408	-0.412239	-0.0372875	-0.637227	-0.495654	-0.109359	-0.00745535	-0.327841	-0.726018	0.260506	-0.476429	-0.204184	-0.187319	-0.302908	-0.284845	0.352878	0.333947	-0.180325	-0.224452	0.228426	-0.043665	-0.467608	1.44635	0.0357809	0.343861	-0.288327	H7BY57	Neurofascin (Fragment) OS=Homo sapiens OX=9606 GN=NFASC PE=1 SV=1	>tr|H7BY57|H7BY57_HUMAN Neurofascin (Fragment) OS=Homo sapiens OX=9606 GN=NFASC PE=1 SV=1	45	39	467
NaN	NaN	NaN	NaN	NaN	NaN	NaN	NaN	NaN	NaN	NaN	NaN	NaN	NaN	NaN	NaN	NaN	NaN	NaN	NaN	-0.341877	0.0846991	-1.58007	0.418276	-0.809373	-1.00412	-1.63642	-1.76821	-0.435512	-1.2163	-0.204745	0.808648	-0.330335	0.853319	-0.53103	-1.06678	-0.534455	-0.0138567	0.536236	0.0181125	0.924271	0.11905	0.343863	-0.548882	Q8N539	Fibrinogen C domain-containing protein 1 OS=Homo sapiens OX=9606 GN=FIBCD1 PE=1 SV=2	>sp|Q8N539|FBCD1_HUMAN Fibrinogen C domain-containing protein 1 OS=Homo sapiens OX=9606 GN=FIBCD1 PE=1 SV=2	2	1	2
0.208405	0.505468	0.329348	0.22637	0.403464	-0.20813	0.447807	-0.0580377	-0.205999	-0.450163	0.165786	0.568692	0.0937225	1.0185	0.369273	-0.428044	0.117836	0.270902	0.0699631	-0.587582	0.469909	-0.0186439	0.515898	0.885225	0.303018	0.749461	-0.312094	0.384181	0.071652	0.415714	0.267212	0.0956552	-0.139078	0.2568	-0.411182	0.0561319	-0.363791	0.607996	-0.256698	0.509766	1.59985	0.0251277	0.343986	-0.264148	P13611	Versican core protein OS=Homo sapiens OX=9606 GN=VCAN PE=1 SV=3	>sp|P13611|CSPG2_HUMAN Versican core protein OS=Homo sapiens OX=9606 GN=VCAN PE=1 SV=3	11	35	184
NaN	NaN	NaN	NaN	NaN	NaN	NaN	NaN	NaN	NaN	NaN	NaN	NaN	NaN	NaN	NaN	NaN	NaN	NaN	NaN	0.278589	0.188373	0.0428024	-0.356574	-0.0479142	0.0754925	-0.74397	-0.359015	-0.439196	-0.629691	-0.265208	0.76175	0.129138	0.920138	0.744085	0.346568	-0.311331	-0.262683	0.861389	-0.0047288	1.11096	0.077454	0.344014	-0.386234	Q9P2B2	Prostaglandin F2 receptor negative regulator OS=Homo sapiens OX=9606 GN=PTGFRN PE=1 SV=2	>sp|Q9P2B2|FPRP_HUMAN Prostaglandin F2 receptor negative regulator OS=Homo sapiens OX=9606 GN=PTGFRN PE=1 SV=2	6	4	6
-2.5398	-1.74129	0.462483	-0.126151	-0.967274	-2.73731	-2.7866	0.82814	-1.97932	-1.12995	-2.33901	0.943076	1.32344	1.23161	2.26086	1.94147	-1.73891	2.42645	-1.19767	1.60597	-0.647243	2.63636	2.16252	3.56383	-0.141643	0.203792	-0.512263	-2.13628	-1.5373	0.187199	0.159393	2.23384	-0.548939	-0.395408	-2.79668	-1.58186	1.52693	-0.772747	-1.96569	0.222118	0.825128	0.149579	0.344028	-0.793389	110	K1C9_HUMAN	>gi|110| K1C9_HUMAN	63	37	465
0.142837	0.0850442	0.0459995	-0.0723618	-0.275874	-0.506279	0.0855629	-0.280243	-0.282764	0.0703122	0.262041	0.0899608	1.15671	0.0735721	0.390662	-0.0418261	-0.688796	0.00760887	0.652831	-0.0645597	1.07881	0.167271	0.48015	-0.012366	0.581962	0.454985	-0.102836	0.502051	-0.220773	-0.50612	0.368782	-0.185079	-0.0175882	0.194123	-0.29989	-0.689635	-0.677201	0.584471	0.30596	0.0144375	1.47214	0.0337178	0.344151	-0.281879	O43300	Leucine-rich repeat transmembrane neuronal protein 2 OS=Homo sapiens OX=9606 GN=LRRTM2 PE=2 SV=3	>sp|O43300|LRRT2_HUMAN Leucine-rich repeat transmembrane neuronal protein 2 OS=Homo sapiens OX=9606 GN=LRRTM2 PE=2 SV=3	24	12	67
-0.324636	-0.356884	0.0233376	-0.597277	0.242358	0.0480812	0.406148	0.586248	0.122194	0.132856	NaN	NaN	NaN	NaN	NaN	NaN	NaN	NaN	NaN	NaN	NaN	NaN	NaN	NaN	NaN	NaN	NaN	NaN	NaN	NaN	-0.310634	0.266187	0.599818	0.696268	-0.670971	-0.237858	1.03227	-0.282136	0.973454	0.713935	1.08953	0.0813704	0.347582	0.392763	P28907	ADP-ribosyl cyclase/cyclic ADP-ribose hydrolase 1 OS=Homo sapiens OX=9606 GN=CD38 PE=1 SV=2	>sp|P28907|CD38_HUMAN ADP-ribosyl cyclase/cyclic ADP-ribose hydrolase 1 OS=Homo sapiens OX=9606 GN=CD38 PE=1 SV=2	7	2	4
0.688484	-0.220643	-1.45756	-0.37192	-1.82559	0.46296	-1.68064	-1.16849	0.442059	0.155793	NaN	NaN	NaN	NaN	NaN	NaN	NaN	NaN	NaN	NaN	-0.00012629	0.2023	-1.20735	-0.280535	-0.106721	-0.0912838	0.0219003	0.538525	0.703024	1.47535	-1.3522	-0.660297	-1.37933	-0.456416	0.207448	0.200191	-0.575527	-0.887522	0.193561	-0.851383	0.978091	0.105174	0.347644	0.477264	C9JU00	Fibrinogen gamma chain (Fragment) OS=Homo sapiens OX=9606 GN=FGG PE=1 SV=1	>tr|C9JU00|C9JU00_HUMAN Fibrinogen gamma chain (Fragment) OS=Homo sapiens OX=9606 GN=FGG PE=1 SV=1	77	8	157
1.02543	0.917991	0.230071	1.03987	0.225804	-0.740637	1.12396	-1.02755	0.247352	-0.280844	-0.477087	0.471578	-0.0847066	0.560175	0.543264	-0.116584	-0.46872	-0.00944519	0.655014	-0.711488	0.605646	-0.671409	0.858484	0.47966	0.836315	0.579597	-0.327349	0.314752	0.228534	0.706626	1.32675	-0.160225	0.486909	-0.223183	0.283867	-0.125213	-0.402944	0.32483	1.05301	0.400289	1.20625	0.0621945	0.347768	-0.3426	P14415	Sodium/potassium-transporting ATPase subunit beta-2 OS=Homo sapiens OX=9606 GN=ATP1B2 PE=1 SV=3	>sp|P14415|AT1B2_HUMAN Sodium/potassium-transporting ATPase subunit beta-2 OS=Homo sapiens OX=9606 GN=ATP1B2 PE=1 SV=3	14	3	20
NaN	NaN	NaN	NaN	NaN	NaN	NaN	NaN	NaN	NaN	NaN	NaN	NaN	NaN	NaN	NaN	NaN	NaN	NaN	NaN	-0.392577	-0.660293	-1.13994	0.0104558	-1.70223	-0.229978	-0.391823	-2.02087	2.82278	1.0067	-0.591768	1.85038	-0.197879	2.29321	0.404655	1.60477	2.31089	1.96077	-0.0367688	1.88611	0.789064	0.162531	0.348123	0.903857	Q71U36	Tubulin alpha-1A chain OS=Homo sapiens OX=9606 GN=TUBA1A PE=1 SV=1	>sp|Q71U36|TBA1A_HUMAN Tubulin alpha-1A chain OS=Homo sapiens OX=9606 GN=TUBA1A PE=1 SV=1	49	15	51
-1.76458	1.26095	-0.155874	-0.963126	-0.124346	1.67431	0.806564	0.320729	-1.01388	1.68633	0.459731	1.27894	-0.772322	-0.0740399	-1.04448	1.44216	1.28837	-0.527892	-1.6687	-0.818958	-1.83477	0.06783	-2.38915	0.252614	0.579521	-2.95775	0.813176	-2.29549	-0.975618	2.2165	-2.13302	-2.95345	-3.08325	-0.732452	-0.17027	0.132291	-1.04782	0.224125	1.63294	-1.87851	0.853277	0.140192	0.348414	0.667421	A0A0A0MT89	Immunoglobulin kappa joining 1 OS=Homo sapiens OX=9606 GN=IGKJ1 PE=4 SV=2	>sp|A0A0A0MT89|KJ01_HUMAN Immunoglobulin kappa joining 1 OS=Homo sapiens OX=9606 GN=IGKJ1 PE=4 SV=2	67	1	15
0.0414849	0.772635	0.616185	0.271429	0.0433496	0.349546	0.617736	-0.164937	0.142876	0.240541	0.17561	0.351101	0.8851	0.780928	0.801299	0.651579	-0.591956	-0.181415	1.15891	-0.233588	0.554564	-0.0562684	0.352089	1.08727	0.858332	0.767919	0.184072	0.408868	0.484826	0.00969978	0.961981	-0.0850371	0.649902	0.712921	-0.139087	-0.545029	-0.441344	0.810769	0.158462	-0.0170876	1.39816	0.0399799	0.348878	-0.291267	O00461	Golgi integral membrane protein 4 OS=Homo sapiens OX=9606 GN=GOLIM4 PE=1 SV=1	>sp|O00461|GOLI4_HUMAN Golgi integral membrane protein 4 OS=Homo sapiens OX=9606 GN=GOLIM4 PE=1 SV=1	33	16	109
0.885657	0.322651	0.700842	0.0143071	-0.623787	-0.238734	0.755759	0.215747	-1.06208	0.656718	0.506592	0.304933	1.61379	-0.201888	0.648118	-0.256969	-1.36838	-0.691593	1.02428	-0.691155	0.403413	0.072823	0.250239	-0.0744456	0.255935	0.580438	-0.640223	0.669506	-0.165121	-0.718569	0.665297	-0.582544	0.253532	0.339967	-0.602837	-1.01138	-0.678143	1.32303	0.0943182	-0.182767	1.11091	0.0774619	0.350932	-0.376896	Q8IZP7	Heparan-sulfate 6-O-sulfotransferase 3 OS=Homo sapiens OX=9606 GN=HS6ST3 PE=2 SV=3	>sp|Q8IZP7|H6ST3_HUMAN Heparan-sulfate 6-O-sulfotransferase 3 OS=Homo sapiens OX=9606 GN=HS6ST3 PE=2 SV=3	43	21	149
-0.375141	-0.216503	-0.270759	-0.143088	-0.230234	-0.434527	0.181931	-0.295279	1.06033	-0.143472	-1.79451	-0.163512	-1.11936	-0.906343	-1.6373	0.25168	-1.06761	-0.676746	-1.10743	-0.300713	-0.607121	-0.351446	-0.805321	-0.685109	-0.881943	-0.236419	-0.777574	-0.314018	-0.376211	-0.514367	NaN	NaN	NaN	NaN	NaN	NaN	NaN	NaN	NaN	NaN	1.14209	0.0720962	0.350956	0.362484	B7WPA5	Pleckstrin homology domain-containing family B member 2 OS=Homo sapiens OX=9606 GN=PLEKHB2 PE=1 SV=1	>tr|B7WPA5|B7WPA5_HUMAN Pleckstrin homology domain-containing family B member 2 OS=Homo sapiens OX=9606 GN=PLEKHB2 PE=1 SV=1	14	4	8
0.809871	0.604967	0.0403308	1.22196	0.0769194	-0.133838	-0.187099	-0.795122	0.0644626	-0.0586721	-1.44339	-0.74099	-1.07365	-1.45205	-0.486072	-0.68214	-0.683812	-0.780895	-0.550927	-0.732684	0.268704	0.659312	0.193708	1.16195	-0.246124	-0.0490983	-0.290049	-0.255443	-0.353126	-0.000113047	-0.249062	0.0449333	0.1331	0.279126	-0.00759394	-0.509097	-0.430682	0.257848	-0.632787	-0.305821	1.18352	0.065536	0.351352	-0.345252	Q9HCM2	Plexin-A4 OS=Homo sapiens OX=9606 GN=PLXNA4 PE=1 SV=4	>sp|Q9HCM2|PLXA4_HUMAN Plexin-A4 OS=Homo sapiens OX=9606 GN=PLXNA4 PE=1 SV=4	10	14	28
-0.00955504	0.350435	0.711014	0.614877	0.586465	1.41444	1.10737	0.820921	0.322526	0.471367	0.210041	-0.321669	0.304023	0.0758357	-1.68549	0.134583	0.975272	0.296067	-0.748003	1.35372	-2.05293	-0.0166561	-2.05033	-0.847869	0.501228	0.711895	-0.591557	-1.46417	0.770172	0.200076	-1.83297	0.411832	0.914419	0.238251	-0.59605	-0.189527	0.963403	-1.47864	-1.27444	1.56122	0.953715	0.111246	0.351445	0.492589	Q7Z5L0	Vitelline membrane outer layer protein 1 homolog OS=Homo sapiens OX=9606 GN=VMO1 PE=1 SV=1	>sp|Q7Z5L0|VMO1_HUMAN Vitelline membrane outer layer protein 1 homolog OS=Homo sapiens OX=9606 GN=VMO1 PE=1 SV=1	27	4	21
NaN	NaN	NaN	NaN	NaN	NaN	NaN	NaN	NaN	NaN	0.379546	-0.963054	-0.632043	-0.778742	-0.0440126	-0.50762	2.43606	0.120816	0.0565412	0.444619	-0.917458	-0.429917	-1.00273	-0.259751	-0.00205074	-0.0531739	0.849009	-0.320599	0.219003	-0.187921	-0.341389	0.42548	-0.231143	1.21455	1.33044	1.22922	0.712522	-0.803902	0.306596	0.190648	0.976794	0.105489	0.352666	0.46294	Q99536	Synaptic vesicle membrane protein VAT-1 homolog OS=Homo sapiens OX=9606 GN=VAT1 PE=1 SV=2	>sp|Q99536|VAT1_HUMAN Synaptic vesicle membrane protein VAT-1 homolog OS=Homo sapiens OX=9606 GN=VAT1 PE=1 SV=2	6	2	4
0.781837	-0.325862	0.0188888	-0.381903	-0.0962472	-0.594974	-0.733761	-0.557774	-0.15607	0.268387	-0.277394	-0.517153	0.237359	-0.0266935	0.26167	-0.0613544	-0.596458	-0.556232	-0.121215	-0.387667	0.139015	-0.490257	0.274067	0.0481563	-0.481281	0.00156306	-0.768092	0.450313	-1.19825	0.298842	-0.525128	0.376443	0.719676	-0.0796503	-0.432731	-0.791356	-0.261945	-0.270465	0.266601	-0.693948	1.41302	0.038635	0.353111	-0.284333	Q9Y5W5	Wnt inhibitory factor 1 OS=Homo sapiens OX=9606 GN=WIF1 PE=1 SV=3	>sp|Q9Y5W5|WIF1_HUMAN Wnt inhibitory factor 1 OS=Homo sapiens OX=9606 GN=WIF1 PE=1 SV=3	19	5	18
0.241713	-0.467371	0.182096	-0.791359	-0.309804	1.76623	1.205	0.0611768	0.378717	0.536432	0.603314	-0.475237	0.669681	-0.404631	-0.0613855	-0.610319	0.423295	0.693045	-0.232758	-0.631473	0.776654	-0.0465809	0.225604	-0.277912	0.036665	1.4207	-0.223005	0.650833	0.318103	-0.373281	0.0254169	-0.023218	-0.0870396	0.0581479	-0.255332	-0.642125	-0.0327253	1.21182	0.231812	0.282209	1.18732	0.0649653	0.353872	0.340713	Q7Z6M3	Allergin-1 OS=Homo sapiens OX=9606 GN=MILR1 PE=1 SV=2	>sp|Q7Z6M3|MILR1_HUMAN Allergin-1 OS=Homo sapiens OX=9606 GN=MILR1 PE=1 SV=2	6	2	7
-0.77479	-0.574986	-0.688899	-0.965686	-0.475674	-0.468846	-0.940628	1.60965	-0.788556	-0.886606	-0.696694	0.0664611	-1.07069	-0.641087	-0.392282	-0.025353	-0.243702	-0.365092	0.286717	1.31915	-0.052128	0.0465179	-0.434102	-0.545892	-0.784107	-0.740381	1.20437	-0.548863	1.89675	-0.479791	0.129933	0.99439	0.231449	0.369023	0.0615273	1.38804	-0.159652	-0.604622	0.0689056	0.409482	1.04715	0.0897115	0.354131	0.406435	Q5T9B7	Adenylate kinase isoenzyme 1 OS=Homo sapiens OX=9606 GN=AK1 PE=1 SV=1	>tr|Q5T9B7|Q5T9B7_HUMAN Adenylate kinase isoenzyme 1 OS=Homo sapiens OX=9606 GN=AK1 PE=1 SV=1	45	9	32
NaN	NaN	NaN	NaN	NaN	NaN	NaN	NaN	NaN	NaN	5.72177	0.0894298	0.230686	0.273111	-1.20516	3.57428	0.912814	-1.38379	-1.59893	-1.52935	7.40545	-1.06404	0.799279	0.00555255	-2.28547	-1.91338	-1.35089	-0.191564	-0.979772	-0.570951	NaN	NaN	NaN	NaN	NaN	NaN	NaN	NaN	NaN	NaN	0.713731	0.193316	0.355425	-1.50021	A0A075B6K2	Immunoglobulin lambda variable 3-12 OS=Homo sapiens OX=9606 GN=IGLV3-12 PE=3 SV=2	>sp|A0A075B6K2|LV312_HUMAN Immunoglobulin lambda variable 3-12 OS=Homo sapiens OX=9606 GN=IGLV3-12 PE=3 SV=2	23	2	15
0.24945	0.174853	-0.551488	0.444013	0.377214	0.449272	-0.905096	-0.269144	0.644688	1.40649	0.414487	-0.792269	0.0830374	-0.772076	0.266082	0.75281	1.75871	1.7033	-0.485788	0.793833	-0.217242	-1.0426	0.166237	-0.78403	-0.294894	-0.148682	0.829064	0.504252	0.0342896	0.977788	-0.824698	0.0723267	0.700905	0.51013	1.8723	0.624547	1.31292	-1.68538	0.714382	-0.436549	1.01354	0.0969312	0.35598	0.426198	P08697	Alpha-2-antiplasmin OS=Homo sapiens OX=9606 GN=SERPINF2 PE=1 SV=3	>sp|P08697|A2AP_HUMAN Alpha-2-antiplasmin OS=Homo sapiens OX=9606 GN=SERPINF2 PE=1 SV=3	53	21	344
0.366911	0.7361	-0.0337048	-0.451825	0.145991	-0.369085	0.278581	-0.62094	0.129133	-0.513234	0.909135	-0.303044	0.786545	0.0539049	-0.178845	-0.759802	-0.279355	0.618572	0.262827	-0.223056	0.98915	-0.859641	0.696607	0.540357	0.495422	0.527972	-1.05988	0.742801	-0.670511	-0.241432	0.849686	0.288238	0.134607	0.189766	-0.36429	-0.682668	-0.187952	0.863909	0.14055	0.494723	1.21856	0.0604564	0.356107	-0.326996	P20916	Myelin-associated glycoprotein OS=Homo sapiens OX=9606 GN=MAG PE=1 SV=1	>sp|P20916|MAG_HUMAN Myelin-associated glycoprotein OS=Homo sapiens OX=9606 GN=MAG PE=1 SV=1	18	9	36
-1.4453	-1.95827	1.15891	-0.0941246	-0.518318	-1.09542	-0.998799	-2.74233	-2.28646	-1.43498	NaN	NaN	NaN	NaN	NaN	NaN	NaN	NaN	NaN	NaN	-0.121314	0.132155	0.034588	0.857625	-1.74656	-0.225081	-0.770253	-0.335653	-1.20376	0.372466	-1.51223	0.77969	0.454015	-0.73057	0.153448	-0.320847	-1.49772	-1.14513	-1.73627	1.95371	0.867623	0.135637	0.357537	-0.594017	Q9BZV3	Interphotoreceptor matrix proteoglycan 2 OS=Homo sapiens OX=9606 GN=IMPG2 PE=1 SV=3	>sp|Q9BZV3|IMPG2_HUMAN Interphotoreceptor matrix proteoglycan 2 OS=Homo sapiens OX=9606 GN=IMPG2 PE=1 SV=3	2	1	7
-0.210031	-0.20728	-0.33673	0.638802	-0.00726654	-0.155987	-0.280405	-0.407922	-0.96102	-0.504196	0.578071	-0.0249684	0.82694	-0.154496	0.273971	-0.510047	-0.305925	0.12932	0.461226	-0.263743	-0.0322037	0.831133	0.100467	0.163939	0.219146	0.66243	0.0544838	0.711999	0.00948138	-0.591441	1.48113	-0.0453609	0.789806	0.487855	0.0386451	-0.333467	-0.307512	1.74316	-0.0732534	-0.157909	1.21705	0.0606672	0.359043	-0.324615	P31321	cAMP-dependent protein kinase type I-beta regulatory subunit OS=Homo sapiens OX=9606 GN=PRKAR1B PE=1 SV=4	>sp|P31321|KAP1_HUMAN cAMP-dependent protein kinase type I-beta regulatory subunit OS=Homo sapiens OX=9606 GN=PRKAR1B PE=1 SV=4	21	7	22
-0.26797	0.277525	-0.0228532	-0.214094	-0.255694	-0.703961	0.939387	-0.59935	0.197068	-0.103995	1.17011	0.163006	1.23241	0.126657	0.475807	-0.114332	-0.0866591	0.013108	-0.53734	-0.658334	0.042381	-0.640187	-0.0646149	0.0393848	-0.0201345	-0.307198	-0.749232	0.259006	-0.0900287	-0.344604	-0.150546	-0.744446	0.0463501	0.47501	0.248866	-0.171691	-0.358108	0.1735	0.011482	-0.75176	1.32646	0.0471564	0.359616	-0.295	P07333	Macrophage colony-stimulating factor 1 receptor OS=Homo sapiens OX=9606 GN=CSF1R PE=1 SV=2	>sp|P07333|CSF1R_HUMAN Macrophage colony-stimulating factor 1 receptor OS=Homo sapiens OX=9606 GN=CSF1R PE=1 SV=2	12	8	121
-0.0797757	-0.0476642	0.0361711	-0.0886308	-0.100085	0.40678	0.317369	-0.285373	0.504266	0.331251	NaN	NaN	NaN	NaN	NaN	NaN	NaN	NaN	NaN	NaN	NaN	NaN	NaN	NaN	NaN	NaN	NaN	NaN	NaN	NaN	NaN	NaN	NaN	NaN	NaN	NaN	NaN	NaN	NaN	NaN	1.22973	0.0589213	0.359755	0.310856	H7C3J4	Neurexin-2 (Fragment) OS=Homo sapiens OX=9606 GN=NRXN2 PE=1 SV=1	>tr|H7C3J4|H7C3J4_HUMAN Neurexin-2 (Fragment) OS=Homo sapiens OX=9606 GN=NRXN2 PE=1 SV=1	54	8	68
0.128942	0.606421	-0.333358	-0.0872407	-0.665791	-0.768234	-0.503326	-1.19336	-0.407985	0.108597	0.132226	0.672284	0.36416	0.247838	0.3389	-0.121678	-0.685853	0.882255	0.330611	0.107558	0.672469	-0.728075	0.53234	0.585433	0.420072	0.199617	-0.791299	0.724406	-0.681028	0.0217853	1.23091	1.51601	1.02774	-1.65672	-0.903105	-1.33466	0.0133074	0.422613	0.303483	-0.125498	1.04949	0.0892289	0.360248	-0.380008	A2RU67	Protein FAM234B OS=Homo sapiens OX=9606 GN=FAM234B PE=1 SV=1	>sp|A2RU67|F234B_HUMAN Protein FAM234B OS=Homo sapiens OX=9606 GN=FAM234B PE=1 SV=1	16	6	18
0.833272	0.747212	1.12158	-1.19379	0.429329	-1.50368	0.531448	-1.56465	0.0299144	2.01217	-0.267985	0.779902	-0.729693	0.400915	-0.421831	-0.834471	-1.45969	0.219011	1.18921	1.62257	1.04923	1.63499	1.8692	-0.783422	0.0728612	0.756103	-0.235532	-0.209177	0.6572	-0.0414077	0.738177	1.34671	0.938975	0.751955	0.0208033	0.141017	0.291304	-1.93161	-1.18988	0.985667	0.926589	0.118416	0.360461	-0.493644	A2AEA2	HLA class I histocompatibility antigen, Cw-6 alpha chain OS=Homo sapiens OX=9606 GN=HLA-C PE=1 SV=2	>tr|A2AEA2|A2AEA2_HUMAN HLA class I histocompatibility antigen, Cw-6 alpha chain OS=Homo sapiens OX=9606 GN=HLA-C PE=1 SV=2	37	11	63
0.439514	0.295389	-0.126449	-0.049127	-0.172512	-0.158336	-0.220715	0.726318	-0.0378086	-0.248004	0.281408	-0.541064	0.159834	-0.50598	0.168	0.190716	0.176193	0.0101625	0.0447966	1.18469	-0.353363	-0.412695	-0.306651	-0.36375	-0.182196	-0.107241	1.0812	0.274415	0.735113	0.0112336	0.443935	-0.320209	0.532582	0.107639	-0.386685	-0.0243584	-0.364901	0.746015	-0.319025	0.478706	1.39486	0.0402845	0.360701	0.273577	185	PPIA_HUMAN	>gi|185| PPIA_HUMAN	72	11	124
NaN	NaN	NaN	NaN	NaN	NaN	NaN	NaN	NaN	NaN	0.250857	1.17045	0.162279	0.576774	0.1623	-0.388332	-0.721723	0.302643	0.475972	-0.507522	0.446084	-0.0830325	0.514618	-0.0216735	0.16528	0.0989577	-0.459315	0.294239	-0.0579433	-0.168234	0.384038	0.334538	0.280359	0.239452	0.380737	-0.0846496	0.348003	-0.045386	1.25979	0.149261	1.28343	0.0520674	0.360729	-0.29782	Q96CW9	Netrin-G2 OS=Homo sapiens OX=9606 GN=NTNG2 PE=1 SV=2	>sp|Q96CW9|NTNG2_HUMAN Netrin-G2 OS=Homo sapiens OX=9606 GN=NTNG2 PE=1 SV=2	18	6	13
-0.0757571	0.385495	-1.73205	-1.01906	-0.326496	0.168723	-1.07795	-0.866709	1.33672	1.01337	1.07392	-1.06559	0.367796	-0.976203	-0.23912	0.67261	1.60248	1.17148	0.443167	0.209082	-1.44862	-1.57846	0.5256	0.165384	-1.26765	-0.714851	-0.294068	0.117726	-0.345846	0.983652	-1.56985	0.276714	0.411497	1.42814	1.54087	0.506685	0.771972	-0.645119	0.367691	-1.16419	0.92189	0.119704	0.361	0.469003	P07360	Complement component C8 gamma chain OS=Homo sapiens OX=9606 GN=C8G PE=1 SV=3	>sp|P07360|CO8G_HUMAN Complement component C8 gamma chain OS=Homo sapiens OX=9606 GN=C8G PE=1 SV=3	69	12	148
-5.23073	-9.27655	-8.37076	-11.5247	-11.1455	-5.04258	-10.3466	4.86358	-9.81723	-5.64513	-4.86552	-2.82199	-7.60603	-2.19199	-7.86788	-6.51016	-5.15115	-5.4549	5.97907	6.66272	-2.24459	5.88028	-8.68441	-3.87348	-1.24193	-6.62355	3.20727	-6.505	4.69221	-3.72742	-1.99007	2.88786	-1.14171	-3.1318	-5.19807	6.15172	-4.71482	-2.93269	-7.05628	-0.618155	0.68309	0.207448	0.361008	2.05252	E9PEW8	Hemoglobin subunit delta (Fragment) OS=Homo sapiens OX=9606 GN=HBD PE=1 SV=1	>tr|E9PEW8|E9PEW8_HUMAN Hemoglobin subunit delta (Fragment) OS=Homo sapiens OX=9606 GN=HBD PE=1 SV=1	86	8	189
-0.284765	0.687762	-0.293733	0.767706	0.627228	-0.387934	-1.03259	-0.125965	0.974398	-0.374532	1.00779	0.0853271	-0.748132	0.542539	0.197358	0.530309	0.882792	0.471062	-0.722785	-0.406206	1.7417	0.398359	0.118936	0.937001	1.87549	-0.349303	1.37422	0.985108	-0.270981	-0.614848	-0.0407235	0.843234	0.481044	-0.687029	0.311884	-0.502515	0.567279	-0.112144	-0.0891737	0.293428	1.05562	0.0879786	0.361152	-0.373968	O43240	Kallikrein-10 OS=Homo sapiens OX=9606 GN=KLK10 PE=1 SV=3	>sp|O43240|KLK10_HUMAN Kallikrein-10 OS=Homo sapiens OX=9606 GN=KLK10 PE=1 SV=3	32	6	31
0.636523	0.405886	0.128985	0.209112	0.126763	-0.192181	0.271602	-0.714195	0.319107	0.339224	-0.933638	0.50571	0.490122	0.896167	-0.000902947	-0.246745	-0.859313	0.479861	0.570861	-0.188778	0.836486	-0.774281	0.433337	0.51654	0.385831	0.276992	-0.475037	0.473189	-0.749846	-0.155058	0.606104	0.626304	0.50496	0.459058	0.132921	-0.229796	-0.25321	0.468599	0.922476	0.125976	1.27667	0.052885	0.361215	-0.300413	Q9H156	SLIT and NTRK-like protein 2 OS=Homo sapiens OX=9606 GN=SLITRK2 PE=1 SV=1	>sp|Q9H156|SLIK2_HUMAN SLIT and NTRK-like protein 2 OS=Homo sapiens OX=9606 GN=SLITRK2 PE=1 SV=1	9	7	26
-4.26573	-5.58584	2.49867	-5.66772	2.10502	-4.79293	2.98703	2.29051	-5.28309	-4.61449	NaN	NaN	NaN	NaN	NaN	NaN	NaN	NaN	NaN	NaN	-2.94423	-3.9241	-3.15037	-3.24199	-3.58323	-2.86327	5.17853	5.06499	-1.98087	2.18806	2.13207	-2.73813	-2.95776	-2.58142	3.33844	2.67191	-2.42672	-2.70063	1.85062	-3.90277	0.699379	0.199812	0.361254	1.61554	Q6UW78	Ubiquinol-cytochrome-c reductase complex assembly factor 3 OS=Homo sapiens OX=9606 GN=UQCC3 PE=1 SV=2	>sp|Q6UW78|UQCC3_HUMAN Ubiquinol-cytochrome-c reductase complex assembly factor 3 OS=Homo sapiens OX=9606 GN=UQCC3 PE=1 SV=2	14	1	3
0.808115	0.505073	0.162747	0.212184	0.143863	-0.801975	0.888347	-0.713644	0.161112	-0.127184	0.602367	0.516169	0.244381	0.0354895	0.391493	-0.0801427	-0.196838	0.268261	0.737907	-0.306281	0.297638	-0.178551	0.325986	0.205099	0.631298	0.627631	-0.521176	0.585689	-0.484567	0.12201	0.81337	-0.175185	0.529743	0.0808579	-0.128137	-0.854267	-0.286247	0.517533	0.547655	0.272221	1.34189	0.0455108	0.361276	-0.283398	Q0P6D2	Protein FAM69C OS=Homo sapiens OX=9606 GN=FAM69C PE=2 SV=3	>sp|Q0P6D2|FA69C_HUMAN Protein FAM69C OS=Homo sapiens OX=9606 GN=FAM69C PE=2 SV=3	16	6	31
0.107527	0.477761	-1.61543	-0.532389	-0.559204	0.180911	-1.05192	-1.05104	1.43366	1.10607	1.01498	-1.46569	0.0822146	-1.09266	-0.434896	0.308022	1.50446	1.18583	0.10239	0.223064	-1.39596	-2.04816	0.501231	-0.00968784	-1.10059	-0.843646	-0.150506	0.122867	-0.743265	1.06802	-2.16248	0.138665	0.363846	1.8912	1.48762	1.04326	0.555467	-0.660424	0.602029	-1.22325	0.904496	0.124596	0.361346	0.503203	P07358	Complement component C8 beta chain OS=Homo sapiens OX=9606 GN=C8B PE=1 SV=3	>sp|P07358|CO8B_HUMAN Complement component C8 beta chain OS=Homo sapiens OX=9606 GN=C8B PE=1 SV=3	51	25	314
NaN	NaN	NaN	NaN	NaN	NaN	NaN	NaN	NaN	NaN	NaN	NaN	NaN	NaN	NaN	NaN	NaN	NaN	NaN	NaN	1.65362	2.01439	2.06033	1.75294	2.69624	1.7377	2.29207	1.01894	1.72385	-0.178067	NaN	NaN	NaN	NaN	NaN	NaN	NaN	NaN	NaN	NaN	0.795924	0.159984	0.361368	-0.716605	P46109	Crk-like protein OS=Homo sapiens OX=9606 GN=CRKL PE=1 SV=1	>sp|P46109|CRKL_HUMAN Crk-like protein OS=Homo sapiens OX=9606 GN=CRKL PE=1 SV=1	13	3	3
NaN	NaN	NaN	NaN	NaN	NaN	NaN	NaN	NaN	NaN	1.19613	-0.275021	0.973395	0.0964328	0.698298	-0.834692	-0.208771	0.453476	0.307819	-0.822558	0.458795	0.334378	-0.0106194	-0.485211	-0.154754	0.972709	-0.408538	0.224902	0.479012	-0.419084	0.797775	0.292532	0.320362	0.764841	0.210871	0.521262	-0.767256	0.212526	-0.21237	0.457112	1.11884	0.0760611	0.361387	-0.350844	Q8N3Z0	Inactive serine protease 35 OS=Homo sapiens OX=9606 GN=PRSS35 PE=2 SV=2	>sp|Q8N3Z0|PRS35_HUMAN Inactive serine protease 35 OS=Homo sapiens OX=9606 GN=PRSS35 PE=2 SV=2	3	1	5
-0.504071	0.320823	-0.685567	-0.0757447	0.270822	0.778145	0.277185	0.764921	0.160106	-0.240668	NaN	NaN	NaN	NaN	NaN	NaN	NaN	NaN	NaN	NaN	NaN	NaN	NaN	NaN	NaN	NaN	NaN	NaN	NaN	NaN	NaN	NaN	NaN	NaN	NaN	NaN	NaN	NaN	NaN	NaN	0.912565	0.122302	0.361421	0.482685	O95817	BAG family molecular chaperone regulator 3 OS=Homo sapiens OX=9606 GN=BAG3 PE=1 SV=3	>sp|O95817|BAG3_HUMAN BAG family molecular chaperone regulator 3 OS=Homo sapiens OX=9606 GN=BAG3 PE=1 SV=3	5	2	3
NaN	NaN	NaN	NaN	NaN	NaN	NaN	NaN	NaN	NaN	-0.534642	-0.765172	-0.117636	-0.868854	-0.827754	-1.02818	-0.0731388	-0.858687	-0.465014	-0.327855	-0.615633	-0.365365	-0.426788	-0.492576	-0.820963	-0.531602	0.660172	-0.682957	0.0528505	0.131988	-0.0588081	-0.64121	-0.194051	0.134165	-0.260579	0.0469638	0.441934	-0.0443516	0.29017	-0.0319219	1.26286	0.0545939	0.361521	0.295749	O14737	Programmed cell death protein 5 OS=Homo sapiens OX=9606 GN=PDCD5 PE=1 SV=3	>sp|O14737|PDCD5_HUMAN Programmed cell death protein 5 OS=Homo sapiens OX=9606 GN=PDCD5 PE=1 SV=3	19	2	6
-0.26255	0.893997	-1.26277	-0.820631	-0.494689	0.470456	-0.401284	-0.627325	0.598615	0.0153243	0.479715	-0.773888	-0.876287	-2.10978	-0.321373	0.082619	-0.0380897	-0.182423	-0.212389	0.537624	-0.705895	0.53266	-0.609228	0.326067	-0.422036	-1.0197	1.47204	-0.668254	-0.0181754	3.50832	-1.51282	-0.883804	-0.669544	0.394155	1.22442	1.03046	-0.358365	-0.83238	-0.626162	-1.0024	0.939734	0.114886	0.361527	0.48014	P07359	Platelet glycoprotein Ib alpha chain OS=Homo sapiens OX=9606 GN=GP1BA PE=1 SV=2	>sp|P07359|GP1BA_HUMAN Platelet glycoprotein Ib alpha chain OS=Homo sapiens OX=9606 GN=GP1BA PE=1 SV=2	3	2	7
0.0629475	-0.0493811	-1.94669	-0.505498	-2.75811	-1.15316	-1.05722	-1.9182	0.688613	0.288364	0.817176	-1.2313	-1.82648	-1.20402	-0.675601	0.0417478	1.52713	0.427005	0.529126	0.61278	-0.723526	-2.68217	0.249151	0.674252	-1.42648	-1.50381	-0.312316	-0.0294434	-1.33869	3.46344	-1.4512	0.381546	-0.478856	-1.26785	3.97213	1.34317	1.39854	-0.993169	0.937748	-1.89041	0.814971	0.153119	0.361566	0.656561	O95445	Apolipoprotein M OS=Homo sapiens OX=9606 GN=APOM PE=1 SV=2	>sp|O95445|APOM_HUMAN Apolipoprotein M OS=Homo sapiens OX=9606 GN=APOM PE=1 SV=2	57	7	79
-0.387265	0.363631	-0.714375	-0.161364	-0.734381	0.246553	-0.529657	-0.0460193	-0.105311	-0.491321	-0.0929871	-0.577414	0.030425	-0.381903	-0.566317	0.00105931	0.166461	-0.383836	-0.169045	0.590085	-0.429486	-0.310325	-0.835467	-0.343537	0.171801	-0.274419	1.30985	0.427684	1.10534	0.0652826	0.221942	0.293128	-0.136705	0.529959	-0.267775	0.0932665	-0.34608	0.145838	-0.382655	-0.00801949	1.33152	0.04661	0.361623	0.287174	P13797	Plastin-3 OS=Homo sapiens OX=9606 GN=PLS3 PE=1 SV=4	>sp|P13797|PLST_HUMAN Plastin-3 OS=Homo sapiens OX=9606 GN=PLS3 PE=1 SV=4	33	20	84
NaN	NaN	NaN	NaN	NaN	NaN	NaN	NaN	NaN	NaN	-2.14639	-0.606628	-0.966739	-0.182572	1.00532	0.584922	0.169757	-0.04927	-0.46805	-0.555325	0.0566511	0.253186	-0.0737625	-0.411857	3.69317	1.80254	2.79641	0.725565	1.20038	0.0749912	-0.963288	-1.14342	-1.09186	-1.85953	1.94695	1.01001	0.672328	-0.421986	0.805246	-0.754771	0.814226	0.153382	0.361736	0.672235	A0A087WXD1	Sodium/hydrogen exchanger OS=Homo sapiens OX=9606 GN=SLC9A7 PE=1 SV=1	>tr|A0A087WXD1|A0A087WXD1_HUMAN Sodium/hydrogen exchanger OS=Homo sapiens OX=9606 GN=SLC9A7 PE=1 SV=1	1	1	3
-0.18577	0.381319	-0.15584	-0.405913	-0.130887	1.36478	-1.431	1.21044	-0.476717	-0.627096	0.0922966	-0.0518624	-0.213699	0.0312993	0.0950631	0.134853	0.671471	0.0937065	-0.781466	0.274128	-0.687336	-0.295514	-0.549686	-0.968384	-0.721652	-0.531618	0.0712744	-0.826929	0.894906	-0.303261	-0.188772	0.861532	-0.0254507	-0.0531189	0.106631	1.00656	2.21637	2.33522	-0.963518	1.00415	0.987598	0.102897	0.361751	0.4201	P07355	Annexin A2 OS=Homo sapiens OX=9606 GN=ANXA2 PE=1 SV=2	>sp|P07355|ANXA2_HUMAN Annexin A2 OS=Homo sapiens OX=9606 GN=ANXA2 PE=1 SV=2	37	12	34
-0.0959873	0.29264	0.427965	-0.164825	-0.14745	0.429405	0.410144	-0.192783	0.0221737	-0.368853	-0.341852	-0.374293	-0.10711	-0.724265	-0.35433	0.334712	-0.386602	-0.217923	0.14349	0.855493	0.444333	0.682616	0.112216	1.08739	0.525738	0.991257	1.24009	1.34885	1.65899	0.587018	NaN	NaN	NaN	NaN	NaN	NaN	NaN	NaN	NaN	NaN	1.06982	0.0851484	0.361793	0.372846	A6NCE7	Microtubule-associated proteins 1A/1B light chain 3 beta 2 OS=Homo sapiens OX=9606 GN=MAP1LC3B2 PE=2 SV=1	>sp|A6NCE7|MP3B2_HUMAN Microtubule-associated proteins 1A/1B light chain 3 beta 2 OS=Homo sapiens OX=9606 GN=MAP1LC3B2 PE=2 SV=1	17	2	4
1.06327	0.00484989	1.40094	1.75275	0.525851	0.651856	0.831839	0.659379	-0.0992591	-0.676058	-2.0674	1.44786	1.01588	0.821094	-0.114571	0.615064	-1.06524	0.00607257	0.314705	0.398504	1.08543	0.373978	0.754049	-0.56559	0.981785	0.723427	-0.122711	0.283788	-0.183782	-0.509995	1.08505	-0.180303	0.8144	-0.512798	-0.345426	-1.28329	-0.834529	1.03566	-0.209305	0.383268	0.99533	0.101081	0.361909	-0.421085	Q96AP7	Endothelial cell-selective adhesion molecule OS=Homo sapiens OX=9606 GN=ESAM PE=1 SV=1	>sp|Q96AP7|ESAM_HUMAN Endothelial cell-selective adhesion molecule OS=Homo sapiens OX=9606 GN=ESAM PE=1 SV=1	17	5	36
0.0863851	0.202464	0.687315	0.130896	-0.140188	0.473807	0.694346	0.136965	-0.36798	-0.0634467	0.399284	0.358988	0.671546	0.763842	0.333869	0.278817	-0.510389	-0.0574966	0.307361	-0.557925	0.923504	0.196938	0.777035	-0.0310643	1.1066	0.95151	-0.311816	0.53749	0.0467425	-0.154186	0.500791	-0.182803	0.440961	0.224784	0.0532207	-0.505974	-0.20029	1.11209	0.0705694	0.0878429	1.35631	0.0440239	0.361969	-0.276816	E7EQR8	Protein YIPF3 OS=Homo sapiens OX=9606 GN=YIPF3 PE=1 SV=1	>tr|E7EQR8|E7EQR8_HUMAN Protein YIPF3 OS=Homo sapiens OX=9606 GN=YIPF3 PE=1 SV=1	5	2	39
1.73072	0.905459	-0.631447	-0.2557	-0.651178	-0.00418942	-0.953409	0.0728979	0.169237	0.347162	0.000251028	-1.66067	-1.21908	-1.28621	-1.01439	-0.821788	0.407716	-1.21185	-0.922822	0.515066	-0.9067	-0.324823	-1.17101	-0.783627	-1.03409	-1.09027	-0.162228	-0.800658	1.23502	2.15141	-0.692631	-0.402046	-0.559295	-0.0200842	0.599222	0.627308	0.440115	-0.0722562	-0.263484	-0.474608	0.962362	0.109053	0.362006	0.428285	P35579	Myosin-9 OS=Homo sapiens OX=9606 GN=MYH9 PE=1 SV=4	>sp|P35579|MYH9_HUMAN Myosin-9 OS=Homo sapiens OX=9606 GN=MYH9 PE=1 SV=4	20	30	55
0.785427	0.197452	1.75305	0.762133	-0.230093	-0.30728	1.13522	0.79762	-0.750425	0.245939	-0.556288	0.836315	1.5514	0.0810996	0.719869	0.561854	-1.08254	-0.137968	0.82022	-0.440394	0.440594	0.0595837	0.00147744	0.266671	0.224449	0.341516	-1.2802	0.277252	0.380408	-1.67041	0.59182	-0.860875	0.927342	-0.475083	-0.51185	-1.69191	-1.34072	1.63685	-0.044528	0.491462	0.966735	0.107961	0.36206	-0.431126	P29120	Neuroendocrine convertase 1 OS=Homo sapiens OX=9606 GN=PCSK1 PE=1 SV=2	>sp|P29120|NEC1_HUMAN Neuroendocrine convertase 1 OS=Homo sapiens OX=9606 GN=PCSK1 PE=1 SV=2	33	20	120
2.99987	1.5151	-1.38246	-0.563229	-1.92261	-0.187123	-2.45608	2.16909	-0.588642	-1.4677	-0.447506	-2.21139	-0.778086	-2.10962	-0.0789183	-0.106691	-0.0921868	-1.00183	-0.0847698	1.98077	-4.06809	-0.0536487	-3.3704	-3.38423	-2.47271	-1.98425	3.75719	-1.26095	1.73439	-0.391805	-0.80104	0.537256	1.55665	1.66894	-0.0329549	2.60857	-1.27198	1.88902	-2.09351	-0.34966	0.78154	0.165371	0.362079	0.810046	P26447	Protein S100-A4 OS=Homo sapiens OX=9606 GN=S100A4 PE=1 SV=1	>sp|P26447|S10A4_HUMAN Protein S100-A4 OS=Homo sapiens OX=9606 GN=S100A4 PE=1 SV=1	17	2	8
-2.33674	-1.03248	-0.405097	-0.925026	2.86759	-2.41908	-2.3205	0.28091	-2.54941	-0.92082	-0.652139	3.00597	1.25894	2.11117	1.98071	1.65535	-1.00247	1.53825	-0.202413	2.15924	0.107786	1.69982	1.9134	1.48213	1.24254	2.12568	-0.374433	-1.23532	-1.30763	0.556877	1.65816	1.12085	-0.736776	-0.472235	-1.6229	-1.30037	4.66519	-0.631956	-1.53943	0.0202487	0.776119	0.167448	0.362121	-0.753388	P02533	Keratin, type I cytoskeletal 14 OS=Homo sapiens OX=9606 GN=KRT14 PE=1 SV=4	>sp|P02533|K1C14_HUMAN Keratin, type I cytoskeletal 14 OS=Homo sapiens OX=9606 GN=KRT14 PE=1 SV=4	51	26	188
0.208639	0.175407	0.550767	0.349967	-0.0787334	-0.0366933	0.408997	-0.258182	-0.729783	-0.0495852	0.573291	0.54798	-0.194076	0.486278	1.27611	-0.0811418	-0.352766	-0.064728	-0.293214	-1.15597	0.211524	-0.264475	0.132245	-0.12423	0.285679	0.26959	0.584763	0.232525	0.134688	-0.157599	0.369099	0.0543036	0.339339	-0.246468	0.129673	-0.0637296	0.197204	0.0979504	0.325821	0.474919	1.43972	0.0363311	0.362127	-0.264963	Q9UJ99	Cadherin-22 OS=Homo sapiens OX=9606 GN=CDH22 PE=2 SV=2	>sp|Q9UJ99|CAD22_HUMAN Cadherin-22 OS=Homo sapiens OX=9606 GN=CDH22 PE=2 SV=2	17	10	44
1.07266	0.263813	0.652404	0.336343	-0.828922	-0.505537	0.577967	0.00372263	-0.386152	0.00777243	-0.581378	0.557673	0.347647	0.947183	0.283496	-0.108436	-1.05559	0.0601424	0.240191	0.16658	0.00229824	0.226574	0.164643	0.598306	0.651084	0.443713	-0.194337	0.283315	0.548808	-0.0900354	1.02857	0.242131	0.922883	0.365733	0.218232	-0.371748	-0.157328	1.13874	0.464667	0.438477	1.24737	0.0565754	0.36218	-0.298322	P61604	10 kDa heat shock protein, mitochondrial OS=Homo sapiens OX=9606 GN=HSPE1 PE=1 SV=2	>sp|P61604|CH10_HUMAN 10 kDa heat shock protein, mitochondrial OS=Homo sapiens OX=9606 GN=HSPE1 PE=1 SV=2	40	4	21
0.0373479	0.475626	0.0168291	0.308539	-0.431728	0.208609	0.258017	0.369423	0.0644394	-0.180595	-0.808098	-0.716705	-0.908557	-0.469526	-0.449284	-0.700435	-0.504448	-0.848332	-0.469342	0.429516	0.178256	0.0656479	0.326579	-0.429713	0.134924	0.682492	0.22102	0.382607	0.370726	-0.361853	-0.46149	-0.6736	-0.383743	-0.445904	-0.607849	0.204731	-0.219611	1.4825	-0.29963	-0.277098	1.27055	0.0536356	0.362211	0.302759	P35754	Glutaredoxin-1 OS=Homo sapiens OX=9606 GN=GLRX PE=1 SV=2	>sp|P35754|GLRX1_HUMAN Glutaredoxin-1 OS=Homo sapiens OX=9606 GN=GLRX PE=1 SV=2	43	4	21
0.913704	0.659047	0.174265	-0.108062	-0.402209	-0.691392	1.39308	-1.3395	0.638295	-0.623367	0.65163	-0.575678	0.0964041	-0.452131	0.0170845	-1.07697	-0.0425488	0.232462	1.00746	-0.42421	0.964118	-0.0283174	0.559197	0.817369	0.85579	0.284215	-0.437215	1.22404	-0.996214	-0.101472	1.49853	0.578678	0.507061	0.0378081	-0.0762991	-0.612571	-0.205798	-0.196763	0.512509	0.649328	1.07352	0.0844273	0.362301	-0.37473	P13473	Lysosome-associated membrane glycoprotein 2 OS=Homo sapiens OX=9606 GN=LAMP2 PE=1 SV=2	>sp|P13473|LAMP2_HUMAN Lysosome-associated membrane glycoprotein 2 OS=Homo sapiens OX=9606 GN=LAMP2 PE=1 SV=2	14	5	82
-0.0260567	-2.01755	-0.173888	0.00796352	-0.603707	1.04566	-0.550379	-1.30523	-0.540792	1.32062	-1.64854	-0.288207	-0.97002	1.51836	1.10101	2.24064	1.24996	-0.527691	-0.492963	-0.934898	-2.59809	1.27797	-3.2472	0.689031	-1.01971	0.332362	-0.652502	-0.310033	-1.85664	-0.876329	-1.97129	-1.39343	-2.66257	0.409497	0.645913	1.02763	0.320386	0.890596	0.0533865	-1.60415	0.839258	0.144791	0.362361	0.590008	A0A0B4J1X5	Immunoglobulin heavy variable 3-74 OS=Homo sapiens OX=9606 GN=IGHV3-74 PE=3 SV=1	>sp|A0A0B4J1X5|HV374_HUMAN Immunoglobulin heavy variable 3-74 OS=Homo sapiens OX=9606 GN=IGHV3-74 PE=3 SV=1	45	6	177
-1.59145	-0.0989188	-0.602577	-0.298034	0.131823	-0.827779	-1.30947	0.0560957	-0.272997	-0.436531	0.359097	0.299601	0.153394	0.0716233	0.741775	0.991214	0.58161	1.41	0.190811	0.601039	-0.343456	-0.659944	-0.944389	-1.00939	-0.682584	-0.0562906	0.0782998	-0.0451371	-0.557543	0.178473	0.108827	-0.402984	-0.125712	0.652381	0.322921	0.810078	0.462365	0.0981998	0.589399	0.543386	1.09326	0.0806744	0.362477	0.350161	Q9UQP3	Tenascin-N OS=Homo sapiens OX=9606 GN=TNN PE=1 SV=2	>sp|Q9UQP3|TENN_HUMAN Tenascin-N OS=Homo sapiens OX=9606 GN=TNN PE=1 SV=2	5	4	8
0.178364	-0.0606529	0.554562	0.0223191	-0.0599198	0.113369	0.514412	-0.0535934	-0.170717	0.232395	0.564932	0.390689	0.568885	0.535189	0.654783	-0.122267	-0.362201	-0.163784	0.00954346	-0.445407	0.490216	-0.163477	0.203828	0.0951566	0.74241	0.675352	-0.164205	0.714332	-0.0849363	-0.463792	0.662786	-0.379936	0.457824	0.393989	0.15583	-0.59833	-0.130146	0.950743	0.100589	0.251287	1.50078	0.0315657	0.362528	-0.260257	O75752	UDP-GalNAc:beta-1,3-N-acetylgalactosaminyltransferase 1 OS=Homo sapiens OX=9606 GN=B3GALNT1 PE=1 SV=1	>sp|O75752|B3GL1_HUMAN UDP-GalNAc:beta-1,3-N-acetylgalactosaminyltransferase 1 OS=Homo sapiens OX=9606 GN=B3GALNT1 PE=1 SV=1	40	11	60
0.502519	0.222796	0.191095	0.207781	-0.0255856	-0.15833	0.496907	0.103099	0.0655022	0.177698	0.490632	0.080991	0.120387	0.0703692	0.443543	-0.414492	-0.227949	-0.245252	-0.00978092	-0.429174	0.368831	-0.270155	0.483774	0.0239527	0.283712	0.160808	-0.119326	0.411087	-0.189139	-0.124289	0.368706	0.123934	0.370631	0.176189	0.363394	-0.262752	0.258543	0.227541	0.200158	0.428342	2.07632	0.00838849	0.362575	-0.212415	Q9UNW1	Multiple inositol polyphosphate phosphatase 1 OS=Homo sapiens OX=9606 GN=MINPP1 PE=1 SV=1	>sp|Q9UNW1|MINP1_HUMAN Multiple inositol polyphosphate phosphatase 1 OS=Homo sapiens OX=9606 GN=MINPP1 PE=1 SV=1	31	14	156
0.166337	-0.994824	-0.721719	0.360331	0.384372	0.454687	0.101011	1.66226	0.849568	0.499891	0.0860282	-0.0674244	0.0335887	0.125521	-0.179318	0.636505	0.880483	0.739101	-0.0973563	0.729677	0.371239	0.400259	-1.86162	1.48043	0.367268	0.433042	0.877161	-2.18932	1.54835	0.567664	0.25276	0.826561	0.49232	0.0585848	0.424774	0.200368	0.91966	-0.203778	0.174522	1.19607	1.00721	0.0983531	0.362667	0.398705	P17931	Galectin-3 OS=Homo sapiens OX=9606 GN=LGALS3 PE=1 SV=5	>sp|P17931|LEG3_HUMAN Galectin-3 OS=Homo sapiens OX=9606 GN=LGALS3 PE=1 SV=5	26	6	30
0.976767	0.658621	0.321797	-0.00554988	-0.524297	-0.374514	0.16893	-0.473394	0.0365809	-0.251951	-0.151671	0.458651	0.204815	0.549593	0.177014	-0.0886537	0.232853	0.313396	-0.0780052	0.256229	0.391619	-0.0450048	0.317361	0.243264	0.245276	0.166737	-0.303794	0.601512	0.338826	0.390819	0.780477	0.363353	0.770473	0.176444	0.174312	-0.258294	-0.0741481	0.47628	0.322409	-0.231225	1.62668	0.0236224	0.362854	-0.245636	P40926	Malate dehydrogenase, mitochondrial OS=Homo sapiens OX=9606 GN=MDH2 PE=1 SV=3	>sp|P40926|MDHM_HUMAN Malate dehydrogenase, mitochondrial OS=Homo sapiens OX=9606 GN=MDH2 PE=1 SV=3	54	14	103
0.141383	0.270023	0.549508	0.347173	0.147824	0.545063	0.393164	0.858467	0.105119	0.409438	NaN	NaN	NaN	NaN	NaN	NaN	NaN	NaN	NaN	NaN	NaN	NaN	NaN	NaN	NaN	NaN	NaN	NaN	NaN	NaN	0.271641	-0.644292	0.213093	-0.252614	-0.819564	0.0704488	0.257662	-0.085584	0.354106	0.575412	1.18179	0.065798	0.362989	0.325912	Q96A11	Galactose-3-O-sulfotransferase 3 OS=Homo sapiens OX=9606 GN=GAL3ST3 PE=1 SV=1	>sp|Q96A11|G3ST3_HUMAN Galactose-3-O-sulfotransferase 3 OS=Homo sapiens OX=9606 GN=GAL3ST3 PE=1 SV=1	4	1	4
0.392963	0.666647	0.00446816	0.0651212	-0.210412	-0.264284	-0.276328	-0.975883	0.213696	0.266181	-0.277583	0.636633	1.38464	0.437372	0.655075	0.0374663	-0.423775	-0.0363001	-0.656639	-0.192833	-0.372537	0.0972772	0.350119	0.661965	0.307371	0.669251	-0.225524	0.719475	0.0407718	0.256576	-0.16039	0.212214	-0.0490887	0.0121022	-0.0871888	-0.35243	-0.355232	0.210833	0.278127	0.238	1.35318	0.0443425	0.363043	-0.277781	A0A0C4DG49	Poliovirus receptor, isoform CRA_c OS=Homo sapiens OX=9606 GN=PVR PE=1 SV=1	>tr|A0A0C4DG49|A0A0C4DG49_HUMAN Poliovirus receptor, isoform CRA_c OS=Homo sapiens OX=9606 GN=PVR PE=1 SV=1	12	5	39
0.532713	2.24318	-0.660827	-0.0670528	0.0909811	0.279286	0.264024	-0.824069	0.678111	0.452275	0.317387	1.68054	-0.254785	1.15201	-0.224531	1.04907	0.113154	0.405985	-0.0504394	0.337821	0.739514	-0.329812	0.666627	0.486337	0.0252866	-0.0306054	-1.05865	-0.631816	-0.670891	-0.126045	0.118453	0.989193	0.617162	-0.383033	-0.359427	-0.143311	0.323137	-0.710042	0.100588	0.391499	1.06203	0.0866911	0.363176	-0.361542	Q9H3T2	Semaphorin-6C OS=Homo sapiens OX=9606 GN=SEMA6C PE=2 SV=4	>sp|Q9H3T2|SEM6C_HUMAN Semaphorin-6C OS=Homo sapiens OX=9606 GN=SEMA6C PE=2 SV=4	14	8	29
0.676431	0.378253	0.374616	0.0969137	-0.277322	0.219266	0.586795	-0.0401839	-0.0744348	-0.504687	0.91151	0.303775	0.981184	0.315453	0.600547	-0.268452	-0.698546	-0.185336	0.46641	0.657261	0.265396	-0.0614042	0.196528	0.287298	0.4559	0.676829	0.514503	0.691245	0.144	0.0164955	1.29106	0.0910756	0.827854	0.552293	-0.216156	-0.722599	-0.601281	1.17638	-0.0677758	0.212313	1.26626	0.0541677	0.363336	-0.29265	E7EMB3	Calmodulin-2 OS=Homo sapiens OX=9606 GN=CALM2 PE=1 SV=1	>tr|E7EMB3|E7EMB3_HUMAN Calmodulin-2 OS=Homo sapiens OX=9606 GN=CALM2 PE=1 SV=1	39	10	59
NaN	NaN	NaN	NaN	NaN	NaN	NaN	NaN	NaN	NaN	-0.410761	-1.11947	-0.235266	-1.35268	-0.709115	-1.59175	-1.79211	-2.07371	-0.810105	-0.828252	-0.997793	-1.22398	-1.74504	-1.64425	-1.44087	-1.28842	-1.94255	-1.23159	-1.48129	-1.82262	-1.23962	-1.66605	-0.249962	-0.653975	-1.09506	-1.73168	-1.19645	-0.113751	-1.53041	-1.43177	1.11008	0.0776097	0.363357	-0.338837	C9JJR8	SPARC-like protein 1 (Fragment) OS=Homo sapiens OX=9606 GN=SPARCL1 PE=1 SV=1	>tr|C9JJR8|C9JJR8_HUMAN SPARC-like protein 1 (Fragment) OS=Homo sapiens OX=9606 GN=SPARCL1 PE=1 SV=1	25	5	112
0.276997	0.245295	0.646876	0.176645	-0.518711	-0.00697161	0.375179	0.139141	-0.423538	0.167982	0.340102	-0.0692916	1.1425	0.246431	0.53774	-0.0384386	-0.729786	-0.117163	0.614801	-0.191034	-0.0961923	0.23746	0.0774143	-0.0290764	0.219622	-0.0662678	-0.228409	0.152553	0.0417319	-0.0937388	0.870696	0.15453	1.04635	0.466419	-0.0684613	-0.374324	-0.42551	0.802748	0.520572	0.43141	1.41186	0.038738	0.36342	-0.26762	Q9HCU4	Cadherin EGF LAG seven-pass G-type receptor 2 OS=Homo sapiens OX=9606 GN=CELSR2 PE=1 SV=1	>sp|Q9HCU4|CELR2_HUMAN Cadherin EGF LAG seven-pass G-type receptor 2 OS=Homo sapiens OX=9606 GN=CELSR2 PE=1 SV=1	13	24	115
-0.467146	-0.024581	-0.714114	-0.344472	-0.193902	1.45508	-0.552144	-0.0384011	-0.122865	0.447119	0.724776	0.420906	0.0374892	0.147746	0.0777482	1.78407	0.607183	0.670113	-0.255133	0.133718	NaN	NaN	NaN	NaN	NaN	NaN	NaN	NaN	NaN	NaN	NaN	NaN	NaN	NaN	NaN	NaN	NaN	NaN	NaN	NaN	0.931146	0.11718	0.36371	0.446429	Q9BT88	Synaptotagmin-11 OS=Homo sapiens OX=9606 GN=SYT11 PE=1 SV=2	>sp|Q9BT88|SYT11_HUMAN Synaptotagmin-11 OS=Homo sapiens OX=9606 GN=SYT11 PE=1 SV=2	6	2	7
0.402667	0.309812	0.841977	0.168378	-0.388159	-0.134647	1.03153	-0.411178	0.183576	0.160372	0.422065	0.513222	0.336041	0.455606	0.60887	-0.360341	-1.12244	-0.564473	0.676942	-0.796983	0.455461	-0.414172	0.000878024	0.0209415	0.601785	0.598008	-0.458022	0.707747	-0.325569	0.022982	0.660278	-0.508808	0.443006	0.399476	-0.350226	-0.857688	-0.549155	0.788154	0.194084	0.0326996	1.19796	0.0633925	0.364783	-0.308175	Q9P121	Neurotrimin OS=Homo sapiens OX=9606 GN=NTM PE=1 SV=1	>sp|Q9P121|NTRI_HUMAN Neurotrimin OS=Homo sapiens OX=9606 GN=NTM PE=1 SV=1	37	12	376
NaN	NaN	NaN	NaN	NaN	NaN	NaN	NaN	NaN	NaN	NaN	NaN	NaN	NaN	NaN	NaN	NaN	NaN	NaN	NaN	-0.0731379	-0.10527	-0.0652091	-0.0756799	-0.0943154	0.202627	1.15074	0.253847	0.11285	0.142114	-0.826883	-0.937414	0.412641	0.307676	0.0670797	0.787315	-0.245	-0.658242	0.316522	0.236312	1.03451	0.0923613	0.365495	0.36896	Q07812	Apoptosis regulator BAX OS=Homo sapiens OX=9606 GN=BAX PE=1 SV=1	>sp|Q07812|BAX_HUMAN Apoptosis regulator BAX OS=Homo sapiens OX=9606 GN=BAX PE=1 SV=1	17	2	6
0.749699	0.02678	1.08091	-0.0475401	1.77383	-3.01384	1.25092	0.0457352	-0.156905	-0.247091	-0.288328	0.301941	0.228554	0.849803	-0.0833651	-0.247799	-0.0673446	0.33839	0.883253	0.345262	0.514448	0.389736	0.900215	0.698021	0.752255	0.643811	0.351887	0.00462143	0.570875	0.0308707	0.660956	0.635139	-0.139769	-0.602765	-0.537638	-1.17255	-0.233069	0.10563	-0.124385	0.650766	0.992661	0.101704	0.366243	-0.395192	P61916	NPC intracellular cholesterol transporter 2 OS=Homo sapiens OX=9606 GN=NPC2 PE=1 SV=1	>sp|P61916|NPC2_HUMAN NPC intracellular cholesterol transporter 2 OS=Homo sapiens OX=9606 GN=NPC2 PE=1 SV=1	66	8	450
0.111953	0.211338	0.304788	0.387033	0.154698	-0.571712	0.852654	-0.110785	0.217789	-0.276909	0.850434	0.819647	-0.789164	0.758176	0.213692	-0.885163	0.0172817	-0.29997	-1.13756	-0.50977	0.601597	-0.190554	0.748196	0.421102	0.390151	0.258674	0.329774	0.918126	-0.194822	-0.215372	0.505785	0.372703	0.25013	-0.787017	0.251134	-0.051258	0.146028	0.190717	0.432374	0.494687	1.22262	0.0598929	0.366736	-0.299052	O75354	Ectonucleoside triphosphate diphosphohydrolase 6 OS=Homo sapiens OX=9606 GN=ENTPD6 PE=1 SV=3	>sp|O75354|ENTP6_HUMAN Ectonucleoside triphosphate diphosphohydrolase 6 OS=Homo sapiens OX=9606 GN=ENTPD6 PE=1 SV=3	22	9	43
-0.858944	0.140423	-1.47727	-0.00414991	-0.337312	3.54507	-1.53601	0.23209	0.0432751	1.86386	0.420801	0.88608	-0.0631686	-0.787693	0.304963	0.64032	1.46793	1.36404	-0.186462	0.0868801	-1.48321	1.23021	-0.0887103	-0.00868769	-0.0851635	-0.116017	0.725603	-0.214961	-0.587083	0.753183	0.00785732	0.19389	0.0157057	-0.975397	1.09626	0.609594	1.03146	-0.872161	0.506796	-1.5956	0.884985	0.130321	0.372447	0.481765	P05543	Thyroxine-binding globulin OS=Homo sapiens OX=9606 GN=SERPINA7 PE=1 SV=2	>sp|P05543|THBG_HUMAN Thyroxine-binding globulin OS=Homo sapiens OX=9606 GN=SERPINA7 PE=1 SV=2	61	22	442
NaN	NaN	NaN	NaN	NaN	NaN	NaN	NaN	NaN	NaN	NaN	NaN	NaN	NaN	NaN	NaN	NaN	NaN	NaN	NaN	-0.196275	1.03394	0.00945393	-0.164444	-0.456124	-0.618685	0.17187	-0.0373602	0.735665	-0.273256	0.503749	1.05829	0.690882	1.11401	1.48778	0.620269	0.23577	0.0986276	-0.314379	0.290163	0.946732	0.113049	0.372624	-0.417258	P21980	Protein-glutamine gamma-glutamyltransferase 2 OS=Homo sapiens OX=9606 GN=TGM2 PE=1 SV=2	>sp|P21980|TGM2_HUMAN Protein-glutamine gamma-glutamyltransferase 2 OS=Homo sapiens OX=9606 GN=TGM2 PE=1 SV=2	4	2	3
0.878976	0.349164	0.609609	0.0962509	-0.300169	0.130458	0.445912	-0.245105	-0.401262	0.230202	0.210228	0.241894	0.697579	0.116871	0.426935	0.202448	-0.328847	-0.107437	0.444435	-0.112497	0.390407	-0.215304	0.566471	0.0373545	0.193397	0.270689	0.0294289	0.460095	-0.303521	0.178426	0.519398	-0.170878	0.508003	0.267669	0.850085	-0.235632	0.0208393	0.510175	0.601208	-0.236108	1.57541	0.0265819	0.37277	-0.236002	P42262	Glutamate receptor 2 OS=Homo sapiens OX=9606 GN=GRIA2 PE=1 SV=3	>sp|P42262|GRIA2_HUMAN Glutamate receptor 2 OS=Homo sapiens OX=9606 GN=GRIA2 PE=1 SV=3	20	16	61
8.31426	4.12457	1.69868	-0.98097	-2.80364	-3.22028	-3.36317	1.67082	-4.32675	-3.16631	-2.00442	-1.21951	-2.14611	-1.47889	5.23819	0.746692	-0.331269	-1.47104	-1.93626	-1.54975	-0.760043	-0.959252	-2.27866	-1.82771	-3.21072	-1.98915	-1.66983	-3.29857	-3.13895	-2.1767	-0.719249	0.121524	-0.37836	-0.478113	0.10896	-0.0574978	3.22015	2.57743	1.50224	-0.836027	0.705421	0.197051	0.372846	-1.05874	P62805	Histone H4 OS=Homo sapiens OX=9606 GN=HIST1H4A PE=1 SV=2	>sp|P62805|H4_HUMAN Histone H4 OS=Homo sapiens OX=9606 GN=HIST1H4A PE=1 SV=2	39	4	23
-0.478151	-0.0326963	-0.981742	0.488613	-0.327418	-0.654402	0.0231222	-1.16524	0.163308	-0.179262	NaN	NaN	NaN	NaN	NaN	NaN	NaN	NaN	NaN	NaN	-0.416815	-1.41479	-0.445675	-0.0793163	-0.15123	0.0982814	-0.289792	0.169101	-0.448341	-0.367028	-2.37356	-1.06743	-1.13541	-0.996497	-0.844928	0.343728	-0.492753	-1.61451	0.939475	-0.769801	0.966418	0.108039	0.373021	0.400862	H3BQ86	Protein NDRG4 (Fragment) OS=Homo sapiens OX=9606 GN=NDRG4 PE=1 SV=1	>tr|H3BQ86|H3BQ86_HUMAN Protein NDRG4 (Fragment) OS=Homo sapiens OX=9606 GN=NDRG4 PE=1 SV=1	42	4	13
-0.542358	0.0606614	-0.820029	-0.449859	-0.268649	0.0786132	-0.444852	-0.555114	0.715003	0.728527	NaN	NaN	NaN	NaN	NaN	NaN	NaN	NaN	NaN	NaN	NaN	NaN	NaN	NaN	NaN	NaN	NaN	NaN	NaN	NaN	NaN	NaN	NaN	NaN	NaN	NaN	NaN	NaN	NaN	NaN	0.853446	0.140137	0.373244	0.508482	Q9NQ66	1-phosphatidylinositol 4,5-bisphosphate phosphodiesterase beta-1 OS=Homo sapiens OX=9606 GN=PLCB1 PE=1 SV=1	>sp|Q9NQ66|PLCB1_HUMAN 1-phosphatidylinositol 4,5-bisphosphate phosphodiesterase beta-1 OS=Homo sapiens OX=9606 GN=PLCB1 PE=1 SV=1	4	3	3
-0.217974	-3.4348	-1.25987	-1.77423	-0.746865	-1.43353	-0.788656	-0.605043	0.551576	2.38718	0.826757	-0.394745	-0.940593	0.392039	-0.14796	-0.944505	2.67525	-1.39103	2.54731	-0.598513	-0.941672	1.61993	-0.191412	-2.05202	-0.799384	-0.0783539	0.0422992	-0.603594	-1.61239	0.93025	-0.390288	-0.467555	-3.67781	-0.154564	2.68677	2.19284	1.60753	-3.55992	5.59293	-2.98503	0.743713	0.180421	0.373265	0.799644	A0A075B7D8	Immunoglobulin heavy variable 3/OR15-7 (pseudogene) (Fragment) OS=Homo sapiens OX=9606 GN=IGHV3OR15-7 PE=1 SV=1	>tr|A0A075B7D8|A0A075B7D8_HUMAN Immunoglobulin heavy variable 3/OR15-7 (pseudogene) (Fragment) OS=Homo sapiens OX=9606 GN=IGHV3OR15-7 PE=1 SV=1	20	2	23
0.634105	0.292327	0.276743	0.656697	0.317896	-0.264192	-0.79317	0.867973	0.0789371	-0.106043	-1.10312	-0.515912	-0.49932	-0.380484	0.0818913	0.630547	-0.0800582	0.714441	-0.265736	1.28447	0.341066	-0.318021	0.43266	-0.935353	0.547938	-0.127974	1.11434	0.306972	1.2651	0.755044	-0.149482	0.454992	0.748513	-0.530788	0.596274	0.882978	0.795834	-0.278636	-0.00823627	0.806823	1.10121	0.0792114	0.37339	0.331539	O00299	Chloride intracellular channel protein 1 OS=Homo sapiens OX=9606 GN=CLIC1 PE=1 SV=4	>sp|O00299|CLIC1_HUMAN Chloride intracellular channel protein 1 OS=Homo sapiens OX=9606 GN=CLIC1 PE=1 SV=4	54	9	53
0.550768	0.439402	0.513827	0.751483	0.0483589	0.0625245	-0.0704781	-0.193989	0.125231	-0.496414	0.203606	1.07643	-1.45674	1.3294	-0.0955784	-0.41283	-0.632158	0.260413	0.54005	-0.671538	0.89588	-0.72121	0.539011	1.1077	-0.0028019	0.778118	-0.527069	0.554095	-0.474062	-0.0171793	0.341376	0.540332	-0.138926	-0.786663	0.136118	-0.814042	-0.160468	-0.216238	0.725529	0.210928	1.09305	0.0807144	0.373521	-0.335068	P12109	Collagen alpha-1(VI) chain OS=Homo sapiens OX=9606 GN=COL6A1 PE=1 SV=3	>sp|P12109|CO6A1_HUMAN Collagen alpha-1(VI) chain OS=Homo sapiens OX=9606 GN=COL6A1 PE=1 SV=3	59	43	515
0.0660468	0.0311217	-0.164456	0.122734	0.767882	-0.842167	-0.231157	-0.308879	0.492392	-0.195152	0.212273	1.0521	0.105838	1.14687	-0.557958	0.342574	0.880103	1.33944	0.0388603	0.327288	0.653465	-0.152675	1.32732	1.23029	0.497953	-0.042189	-0.219437	0.0197587	-0.175738	0.340318	-0.0436024	1.74835	-0.0902511	-0.206447	0.1817	-0.178875	0.185405	-1.26249	0.35592	0.373173	1.08271	0.0826599	0.375909	-0.334471	P17050	Alpha-N-acetylgalactosaminidase OS=Homo sapiens OX=9606 GN=NAGA PE=1 SV=2	>sp|P17050|NAGAB_HUMAN Alpha-N-acetylgalactosaminidase OS=Homo sapiens OX=9606 GN=NAGA PE=1 SV=2	34	11	51
-1.00059	0.613229	-2.32195	-0.90408	-1.42669	0.48724	-1.11679	-1.29143	0.718064	0.925113	NaN	NaN	NaN	NaN	NaN	NaN	NaN	NaN	NaN	NaN	NaN	NaN	NaN	NaN	NaN	NaN	NaN	NaN	NaN	NaN	NaN	NaN	NaN	NaN	NaN	NaN	NaN	NaN	NaN	NaN	0.711029	0.194523	0.376724	0.952457	A0A0G2JK28	Complement C2 (Fragment) OS=Homo sapiens OX=9606 GN=C2 PE=1 SV=1	>tr|A0A0G2JK28|A0A0G2JK28_HUMAN Complement C2 (Fragment) OS=Homo sapiens OX=9606 GN=C2 PE=1 SV=1	54	17	301
0.182825	0.390307	-0.261258	1.32202	-0.887388	-0.0194728	0.907002	2.27246	-1.29383	-0.263816	0.080997	-0.807225	-1.00109	-0.315299	0.388384	0.270447	0.30097	-0.697537	-1.20748	-0.403096	0.789305	0.387135	-0.430102	0.4795	-0.0239386	-0.0997626	2.82439	1.03256	1.22484	0.835155	-0.379507	-1.2229	-0.907532	0.494373	-0.423026	-0.0160828	1.10596	0.158214	-0.455235	0.118127	0.911448	0.122617	0.376811	0.436912	Q15828	Cystatin-M OS=Homo sapiens OX=9606 GN=CST6 PE=1 SV=1	>sp|Q15828|CYTM_HUMAN Cystatin-M OS=Homo sapiens OX=9606 GN=CST6 PE=1 SV=1	63	7	64
-0.193567	-0.220567	1.48274	0.613278	0.892274	0.160347	-0.362178	0.467584	-0.985294	0.131084	NaN	NaN	NaN	NaN	NaN	NaN	NaN	NaN	NaN	NaN	NaN	NaN	NaN	NaN	NaN	NaN	NaN	NaN	NaN	NaN	NaN	NaN	NaN	NaN	NaN	NaN	NaN	NaN	NaN	NaN	0.782611	0.164964	0.377317	-0.632523	Q9Y5H3	Protocadherin gamma-A10 OS=Homo sapiens OX=9606 GN=PCDHGA10 PE=2 SV=1	>sp|Q9Y5H3|PCDGA_HUMAN Protocadherin gamma-A10 OS=Homo sapiens OX=9606 GN=PCDHGA10 PE=2 SV=1	7	5	9
0.598449	0.166414	0.108693	0.372504	0.14305	-0.596454	0.595274	-0.535306	0.579542	-0.430133	0.237967	0.970713	-0.313953	0.207518	-0.409684	0.144509	-0.0861964	0.377833	1.04026	0.0557231	0.235715	-0.315	0.680715	0.64148	0.68394	0.707761	-0.699195	0.0485989	0.0814732	-0.171848	0.599289	0.973044	0.470782	0.734782	0.168231	-0.0860201	-0.040983	-0.200675	0.585608	0.094285	1.28136	0.0523161	0.377539	-0.274529	P01019	Angiotensinogen OS=Homo sapiens OX=9606 GN=AGT PE=1 SV=1	>sp|P01019|ANGT_HUMAN Angiotensinogen OS=Homo sapiens OX=9606 GN=AGT PE=1 SV=1	49	22	1679
-0.557385	-0.671188	-2.03314	-0.695198	0.478556	-0.946437	-0.270503	-0.753522	-1.37377	0.933217	-0.419945	0.0598365	-0.552099	-0.767165	-0.4821	1.42893	2.03559	-0.329904	-1.00819	-0.366188	-1.30804	1.6767	-0.569572	1.59863	0.0387827	-1.06792	1.19076	-0.291123	0.203754	0.826016	-1.26035	-0.517622	-1.31529	0.0284224	0.415691	0.949194	1.28882	1.10862	0.0817574	-1.09141	0.878121	0.132397	0.377553	0.470009	P01700	Immunoglobulin lambda variable 1-47 OS=Homo sapiens OX=9606 GN=IGLV1-47 PE=1 SV=2	>sp|P01700|LV147_HUMAN Immunoglobulin lambda variable 1-47 OS=Homo sapiens OX=9606 GN=IGLV1-47 PE=1 SV=2	50	3	89
-0.0573949	-0.142244	0.0264774	-0.218971	-0.382827	0.331866	0.206877	0.271582	1.6706	-0.348241	0.141574	-0.264398	0.288677	0.0448479	0.116071	-0.0980649	-0.18984	0.163302	0.43093	0.789278	-0.183284	0.102324	0.0545771	-0.297427	0.437179	0.362023	0.77155	0.512974	0.291868	-0.297589	0.575586	-0.883773	0.3456	0.147712	-0.212584	-0.0731698	-0.534223	0.628791	-0.178847	0.342586	1.30569	0.049466	0.377747	0.270826	E5RJD8	Tubulin-specific chaperone A OS=Homo sapiens OX=9606 GN=TBCA PE=1 SV=1	>tr|E5RJD8|E5RJD8_HUMAN Tubulin-specific chaperone A OS=Homo sapiens OX=9606 GN=TBCA PE=1 SV=1	39	5	25
NaN	NaN	NaN	NaN	NaN	NaN	NaN	NaN	NaN	NaN	1.05136	-0.414615	0.602308	-0.180484	0.23408	0.783953	0.697303	0.0913107	0.72439	0.32745	-0.478073	-0.759802	-0.246648	-0.515593	-0.875117	-0.822826	-0.860923	-0.837092	-1.52449	-0.395791	-0.767386	-0.749663	-0.816924	-0.410208	-0.555508	0.0792886	3.88527	-0.219013	2.06638	-0.606539	0.813338	0.153696	0.378537	0.551396	Q53RT3	Retroviral-like aspartic protease 1 OS=Homo sapiens OX=9606 GN=ASPRV1 PE=1 SV=1	>sp|Q53RT3|APRV1_HUMAN Retroviral-like aspartic protease 1 OS=Homo sapiens OX=9606 GN=ASPRV1 PE=1 SV=1	4	1	8
-0.556763	-0.255364	-0.0266097	0.0802376	0.295589	0.0686958	-0.174675	0.168668	0.795671	0.155525	0.501176	0.13837	0.278895	0.161507	-0.0370453	0.50072	-0.129894	0.761454	-0.363238	0.128948	0.362281	-0.400153	0.280801	-0.674723	-0.104295	-0.0189469	0.665461	-0.407037	0.398316	-0.170361	-1.72426	0.769208	-0.118755	-0.862628	-0.306256	0.232821	0.275021	-0.681709	0.578325	0.972159	1.16811	0.0679029	0.378978	0.297736	Q05707	Collagen alpha-1(XIV) chain OS=Homo sapiens OX=9606 GN=COL14A1 PE=1 SV=3	>sp|Q05707|COEA1_HUMAN Collagen alpha-1(XIV) chain OS=Homo sapiens OX=9606 GN=COL14A1 PE=1 SV=3	29	39	191
0.195489	-0.376381	0.328829	-0.564353	-0.335068	-0.303195	-1.51801	0.312816	0.608569	-0.245275	NaN	NaN	NaN	NaN	NaN	NaN	NaN	NaN	NaN	NaN	0.410463	0.078488	0.519841	-0.290518	0.0820888	-0.498757	-1.01815	-0.68925	-0.959074	-0.154384	0.134382	2.22747	-0.561947	0.19368	0.333455	-0.472155	0.512545	-0.539056	0.129964	1.13024	0.935628	0.115977	0.37945	-0.405272	Q6P4A8	Phospholipase B-like 1 OS=Homo sapiens OX=9606 GN=PLBD1 PE=1 SV=2	>sp|Q6P4A8|PLBL1_HUMAN Phospholipase B-like 1 OS=Homo sapiens OX=9606 GN=PLBD1 PE=1 SV=2	5	2	5
-0.292387	1.19454	-0.15405	0.317937	1.44439	1.01064	-0.0782395	1.62344	0.042308	1.25048	0.521837	-0.826377	-1.01623	-0.657241	-0.147821	-1.05573	2.10832	-0.411257	1.06045	-0.314433	0.795949	0.196269	0.0446723	0.417202	-0.228655	0.152837	0.0613654	-0.0144869	1.57699	-0.417064	-0.964435	-1.07593	-0.812299	-0.292975	0.44309	1.08877	-0.206111	-0.724507	0.563502	-0.246773	0.933669	0.116501	0.379526	0.408151	C9JF17	Apolipoprotein D (Fragment) OS=Homo sapiens OX=9606 GN=APOD PE=1 SV=1	>tr|C9JF17|C9JF17_HUMAN Apolipoprotein D (Fragment) OS=Homo sapiens OX=9606 GN=APOD PE=1 SV=1	51	14	1512
0.0491152	0.362803	-1.78664	-1.07269	-1.53036	-2.4117	-1.96913	-1.01574	1.40245	0.809441	-0.0925244	-1.14437	-0.904314	-0.764764	-0.299015	0.55891	1.43534	0.70095	-0.054856	0.0488709	-1.60301	-0.853789	-0.486136	-1.0901	-0.402839	-1.38636	0.613348	-0.190112	-0.242893	2.55964	-1.49549	-0.469784	0.113943	1.00349	2.68071	1.1786	0.936678	-1.02263	1.54941	-2.16289	0.809435	0.155083	0.379558	0.556154	P19827	Inter-alpha-trypsin inhibitor heavy chain H1 OS=Homo sapiens OX=9606 GN=ITIH1 PE=1 SV=3	>sp|P19827|ITIH1_HUMAN Inter-alpha-trypsin inhibitor heavy chain H1 OS=Homo sapiens OX=9606 GN=ITIH1 PE=1 SV=3	44	30	623
-0.256329	0.55232	0.442262	0.851295	1.18147	-0.00110502	-0.353567	1.19087	0.48561	0.729921	-0.679372	-1.30319	-0.104295	-0.687857	-0.457865	-0.46931	1.36404	0.455369	-0.909368	1.87016	-2.46175	-3.06948	-1.424	-2.97007	-1.22905	-0.775271	-1.3098	-1.44706	-1.7207	-1.22394	0.250207	1.12926	-0.811445	-1.37664	-0.941102	-0.735974	0.685634	-0.955574	-1.30114	2.16368	0.815943	0.152777	0.379857	0.555405	P03950	Angiogenin OS=Homo sapiens OX=9606 GN=ANG PE=1 SV=1	>sp|P03950|ANGI_HUMAN Angiogenin OS=Homo sapiens OX=9606 GN=ANG PE=1 SV=1	58	8	65
0.297412	-0.298987	0.234267	-0.0139076	-0.248751	-0.238346	0.537227	-0.377855	-0.247783	0.0788775	0.337677	0.410277	0.661737	1.09586	0.42491	-0.0183701	-0.459556	-0.270797	0.464058	0.143883	0.51723	-0.469419	0.277261	0.659165	-0.0236644	0.724216	-0.514452	0.425592	-0.0638413	-0.0502383	0.543227	-0.0225597	0.592538	0.648187	-0.231375	-0.504858	-0.59215	0.612848	0.496779	-0.0229345	1.31447	0.0484764	0.379883	-0.263439	Q8N3T6	Transmembrane protein 132C OS=Homo sapiens OX=9606 GN=TMEM132C PE=2 SV=3	>sp|Q8N3T6|T132C_HUMAN Transmembrane protein 132C OS=Homo sapiens OX=9606 GN=TMEM132C PE=2 SV=3	38	31	220
1.53362	0.504788	0.606181	0.446286	-0.0877086	-0.287367	1.03623	-1.26001	-0.59104	-0.0529716	0.33849	0.992468	-1.00236	1.05346	0.749047	-1.03357	-0.839517	-0.77735	0.514505	-0.876414	0.709611	-0.490245	-0.385541	-0.0996717	0.960423	0.217587	-0.156637	1.10523	0.673893	0.212846	0.455542	-0.31461	0.877371	-0.461454	0.489633	0.319067	0.187247	0.353407	1.17998	-0.39334	0.999219	0.10018	0.379887	-0.367178	P04180	Phosphatidylcholine-sterol acyltransferase OS=Homo sapiens OX=9606 GN=LCAT PE=1 SV=1	>sp|P04180|LCAT_HUMAN Phosphatidylcholine-sterol acyltransferase OS=Homo sapiens OX=9606 GN=LCAT PE=1 SV=1	40	12	152
-0.526992	-1.11807	-1.29645	-1.37759	-0.951294	-0.162567	-1.45199	2.22783	-1.33057	-0.658298	0.294926	-1.01951	-1.44642	-0.606312	-1.2435	-0.128886	-0.00831022	-0.687358	0.261603	2.02162	-0.0352173	0.00591382	-0.32836	0.104842	-0.641341	-0.782001	0.543349	-0.627556	0.854248	-0.387243	-0.72253	1.06343	-0.645895	-0.736753	-0.897236	2.55995	-1.01603	-1.51714	-0.394642	-1.91688	0.864669	0.136562	0.379994	0.476175	P13716	Delta-aminolevulinic acid dehydratase OS=Homo sapiens OX=9606 GN=ALAD PE=1 SV=1	>sp|P13716|HEM2_HUMAN Delta-aminolevulinic acid dehydratase OS=Homo sapiens OX=9606 GN=ALAD PE=1 SV=1	12	3	5
-0.340726	0.603522	0.158047	0.428097	-0.577325	-0.390666	0.69694	0.0257829	-0.33823	0.0941526	0.948218	0.765354	0.285945	0.660777	-0.57483	-0.312225	0.160893	0.460754	-0.0970441	-0.221773	0.615477	0.357982	-0.267824	0.184873	-0.212049	0.121034	-0.0655709	0.271128	-1.2329	0.0452907	-0.0533155	-0.391541	0.0177722	0.245082	0.346415	-0.345516	-0.573742	-0.273863	-0.0111031	-0.218865	1.2786	0.0526508	0.380212	-0.270274	Q9Y3Q3	Transmembrane emp24 domain-containing protein 3 OS=Homo sapiens OX=9606 GN=TMED3 PE=1 SV=1	>sp|Q9Y3Q3|TMED3_HUMAN Transmembrane emp24 domain-containing protein 3 OS=Homo sapiens OX=9606 GN=TMED3 PE=1 SV=1	19	3	7
-1.34876	0.431818	-0.639043	-0.583735	-0.316728	3.77154	-1.00551	0.341869	-1.06278	-0.530805	-0.378181	-0.830019	-0.426397	-0.0330944	-0.693382	-0.0753681	-0.0475379	-0.0167596	-1.16442	-0.224155	-0.0902575	0.119507	0.0242712	-0.456799	-0.367469	0.191102	0.698242	-1.08429	-0.660612	-0.675172	-1.07349	-0.983157	-1.62616	-1.02652	-1.29062	-0.126298	1.92517	-0.62861	-1.26505	-0.895042	0.887177	0.129665	0.380262	0.452686	P31944	Caspase-14 OS=Homo sapiens OX=9606 GN=CASP14 PE=1 SV=2	>sp|P31944|CASPE_HUMAN Caspase-14 OS=Homo sapiens OX=9606 GN=CASP14 PE=1 SV=2	31	7	21
-0.556249	0.193826	-0.771316	-0.360728	-0.37238	0.250334	-0.531268	-0.636012	0.0826672	-0.0676589	0.170899	0.276514	0.605426	-0.0606776	0.116036	1.09309	0.87949	1.5806	-0.173241	0.562167	-0.360931	-0.0163542	-0.0914007	-0.611065	-0.313151	-0.131572	0.393681	-0.288055	-0.188346	-0.0128269	-0.360712	0.106138	0.0488003	0.0489259	0.551714	0.761401	0.643493	0.0335623	0.1788	-0.367533	1.19695	0.0635405	0.380304	0.290973	Q16853	Membrane primary amine oxidase OS=Homo sapiens OX=9606 GN=AOC3 PE=1 SV=3	>sp|Q16853|AOC3_HUMAN Membrane primary amine oxidase OS=Homo sapiens OX=9606 GN=AOC3 PE=1 SV=3	8	6	22
-0.880095	-1.81568	-0.821454	-0.154303	-0.479494	-0.370494	-1.06073	-1.28362	-0.498578	0.349682	1.45811	-1.61138	0.53894	0.218706	-0.712545	0.178916	2.11211	-0.126618	0.495961	3.18676	-2.02988	1.80492	-1.22861	-0.337099	0.295723	1.18218	-1.26446	-1.24833	-0.0768735	0.213902	-0.378702	-1.92138	-2.54527	0.122457	1.76876	2.02314	0.60358	-0.158611	0.396059	-1.89664	0.803514	0.157212	0.380452	0.573281	A0A075B7B8	Immunoglobulin heavy variable 3/OR16-12 (non-functional) (Fragment) OS=Homo sapiens OX=9606 GN=IGHV3OR16-12 PE=1 SV=1	>tr|A0A075B7B8|A0A075B7B8_HUMAN Immunoglobulin heavy variable 3/OR16-12 (non-functional) (Fragment) OS=Homo sapiens OX=9606 GN=IGHV3OR16-12 PE=1 SV=1	26	3	138
0.503612	0.157881	0.283634	0.293405	-0.40464	0.175255	0.737588	-0.226984	0.0371282	-0.269946	0.469929	0.0739521	0.698038	0.0157889	0.230228	-0.478609	-0.577935	-0.404427	0.140794	-0.611513	0.301056	0.0629349	0.243686	0.350587	0.545596	0.468747	-0.0744451	0.365188	-0.187094	-0.280156	0.624307	-0.503027	0.435659	0.243272	-0.0713104	-0.571597	-0.381531	1.0818	0.0344847	0.421444	1.34204	0.0454946	0.381214	-0.25782	P23468	Receptor-type tyrosine-protein phosphatase delta OS=Homo sapiens OX=9606 GN=PTPRD PE=1 SV=2	>sp|P23468|PTPRD_HUMAN Receptor-type tyrosine-protein phosphatase delta OS=Homo sapiens OX=9606 GN=PTPRD PE=1 SV=2	37	51	409
-1.62532	-0.599053	-1.48026	-0.88944	1.30258	1.13389	-1.46175	0.08074	0.533166	0.25524	0.431744	-0.535475	-0.599853	0.0237854	-0.277871	0.120604	1.00348	0.181543	-0.160898	0.495241	1.23618	0.806091	-0.183293	0.0135799	-0.145291	-0.445757	1.76276	-0.742737	0.593084	0.653749	-0.712198	-0.226943	-0.846029	0.45223	0.431321	0.985539	0.678225	-0.674047	0.0420541	-0.552756	0.93878	0.115138	0.382684	0.395244	Q07507	Dermatopontin OS=Homo sapiens OX=9606 GN=DPT PE=1 SV=2	>sp|Q07507|DERM_HUMAN Dermatopontin OS=Homo sapiens OX=9606 GN=DPT PE=1 SV=2	51	6	36
0.562602	-0.0653688	0.826945	0.323352	0.0958272	-0.435421	0.464209	0.174368	0.0254394	-0.898674	-0.225742	0.414995	0.013569	0.301727	0.345435	-0.188307	-0.73013	-0.495152	0.921658	-0.576324	0.592511	-0.0439689	0.481383	0.62595	0.6129	0.690587	-0.245577	0.647132	-0.179318	0.157719	0.688424	-0.0620233	0.503358	-0.631551	-0.80352	-0.931925	-0.4734	0.497841	0.030327	0.244533	1.16982	0.0676361	0.383063	-0.292861	P98153	Integral membrane protein DGCR2/IDD OS=Homo sapiens OX=9606 GN=DGCR2 PE=1 SV=1	>sp|P98153|IDD_HUMAN Integral membrane protein DGCR2/IDD OS=Homo sapiens OX=9606 GN=DGCR2 PE=1 SV=1	14	7	46
-0.549206	-0.160749	-0.549094	-0.0687251	-0.338245	-0.277414	-0.869449	-1.01548	0.408212	0.185339	0.849759	0.141366	1.09865	0.835243	0.687519	0.285372	0.0290844	-0.0279822	0.445764	-0.219266	0.96256	-0.148788	0.465431	0.356235	0.2727	0.829602	-0.117249	0.724339	-0.0278828	-0.524707	0.721346	-0.106609	1.0166	0.0889582	0.632625	-0.729777	-0.454357	1.05659	-0.0766836	0.380883	1.10472	0.0785746	0.383559	-0.310132	A0A2R8Y4Z1	Protein HEG homolog 1 (Fragment) OS=Homo sapiens OX=9606 GN=HEG1 PE=1 SV=1	>tr|A0A2R8Y4Z1|A0A2R8Y4Z1_HUMAN Protein HEG homolog 1 (Fragment) OS=Homo sapiens OX=9606 GN=HEG1 PE=1 SV=1	18	4	28
-0.921845	-0.177352	-1.48158	-1.37803	-1.38622	0.203945	-1.13743	-0.173295	0.587083	0.873771	0.1104	0.0728731	-0.566079	0.225318	0.494144	-0.801284	0.370994	0.0573217	-0.475717	0.23653	NaN	NaN	NaN	NaN	NaN	NaN	NaN	NaN	NaN	NaN	NaN	NaN	NaN	NaN	NaN	NaN	NaN	NaN	NaN	NaN	0.85158	0.140741	0.383574	0.47503	A0A1W2PRW1	N-acetyllactosaminide beta-1,6-N-acetylglucosaminyl-transferase OS=Homo sapiens OX=9606 GN=GCNT2 PE=1 SV=1	>tr|A0A1W2PRW1|A0A1W2PRW1_HUMAN N-acetyllactosaminide beta-1,6-N-acetylglucosaminyl-transferase OS=Homo sapiens OX=9606 GN=GCNT2 PE=1 SV=1	12	4	10
-0.192693	-0.0448674	-0.475342	-0.119011	0.172322	-0.132788	-0.3659	-0.545941	0.53756	0.250348	0.330527	0.756784	0.308189	0.348727	0.413776	-0.186779	-0.122595	-0.248355	0.215476	0.0790544	0.429221	-0.374647	0.34064	0.613774	0.2372	0.178745	-0.597867	0.356907	-0.345427	0.0912071	-0.00944994	0.396357	0.123827	0.358727	0.0997484	-0.466649	-0.246611	0.237588	0.396784	0.0200745	1.53232	0.0293546	0.384064	-0.230449	P98155	Very low-density lipoprotein receptor OS=Homo sapiens OX=9606 GN=VLDLR PE=1 SV=1	>sp|P98155|VLDLR_HUMAN Very low-density lipoprotein receptor OS=Homo sapiens OX=9606 GN=VLDLR PE=1 SV=1	32	20	54
0.379521	0.743254	0.176335	0.0661675	-0.349404	0.0324362	0.550863	-0.387076	0.109743	0.245409	0.907386	-0.515245	1.07267	-0.0163458	0.380326	-0.531463	-0.775628	-0.525776	0.994009	-0.57234	0.184042	-0.330249	0.119774	0.530112	0.350253	0.288392	-0.329057	0.677766	-0.201974	-0.237922	0.540428	-0.771339	0.391944	0.667927	-0.0122661	-0.682129	-0.575217	0.885641	-0.0758084	-0.288446	1.15219	0.0704392	0.38439	-0.295693	P22607	Fibroblast growth factor receptor 3 OS=Homo sapiens OX=9606 GN=FGFR3 PE=1 SV=1	>sp|P22607|FGFR3_HUMAN Fibroblast growth factor receptor 3 OS=Homo sapiens OX=9606 GN=FGFR3 PE=1 SV=1	13	7	58
-0.152787	0.473067	0.137564	-0.206336	-0.0258157	-0.146307	0.247936	0.212651	0.560312	-0.121101	1.03849	0.154173	0.266964	0.0782642	0.765284	-0.0281782	0.0824475	0.340855	0.292679	0.139431	0.442046	0.417954	0.704591	0.898461	0.368346	-0.135144	0.19573	-0.169232	0.288018	-0.505104	-0.0949764	-0.609256	-0.573074	-0.875266	-0.388066	-0.758045	-0.920945	-0.870909	-1.7221	-0.304154	1.10865	0.0778663	0.384775	-0.307039	A6NFX8	ADP-sugar pyrophosphatase OS=Homo sapiens OX=9606 GN=NUDT5 PE=1 SV=1	>tr|A6NFX8|A6NFX8_HUMAN ADP-sugar pyrophosphatase OS=Homo sapiens OX=9606 GN=NUDT5 PE=1 SV=1	25	5	16
-1.73166	2.47336	-0.0327765	-0.597267	0.0291224	-1.13877	-0.00073122	0.688715	0.0879649	-0.558228	0.184567	-1.20825	0.0765374	1.02693	0.0287924	-0.555186	2.02279	-0.813463	-0.731303	-0.536994	-0.11027	-1.05684	-0.649593	-0.0358894	-0.865508	0.470756	-0.25047	-0.0424014	2.82977	0.974231	-1.16056	-1.85055	-0.122074	-0.614614	0.0993887	1.36898	-0.843968	0.633481	-0.731757	0.526971	0.850748	0.141011	0.384793	0.475877	P29762	Cellular retinoic acid-binding protein 1 OS=Homo sapiens OX=9606 GN=CRABP1 PE=1 SV=2	>sp|P29762|RABP1_HUMAN Cellular retinoic acid-binding protein 1 OS=Homo sapiens OX=9606 GN=CRABP1 PE=1 SV=2	41	5	17
[truncated: 2,165 more rows]
[truncated: 7 more columns]
